# Supplementary material for: Role of MicroRNAs in Protective Effects of Forsythoside A Against Lipopolysaccharide-Induced Inflammation in Bovine Endometrial Stromal Cells
Source: Front Vet Sci. 2021 Feb 24;8:642913. doi: 10.3389/fvets.2021.642913 (PMC7943879; doi:10.3389/fvets.2021.642913)
Supplement: Supplementary Table 4 — Gene Ontology (GO) enrichment analysis of the differentially expressed miRNA target genes. [file Table_4.XLSX]

## Sheet: Sheet1
Supplementary Table 4. Gene Ontology (GO) enrichment analysis of the differentially expressed miRNA target genes.
Category	GO.ID	Term	Pvalue	FDR	Gene
MF	GO:0005488	binding	< 1e-30	1.835e-28	ENSBTAG00000000005(GRK3),ENSBTAG00000000009(FOXF1),ENSBTAG00000000010(UBL7),ENSBTAG00000000011(TDH),ENSBTAG00000000012(TTC33),ENSBTAG00000000013(PRKAA1),ENSBTAG00000000016(LTA),ENSBTAG00000000020(TRPV3),ENSBTAG00000000022(NUP37),ENSBTAG00000000023(RNF2),ENSBTAG00000000025(RAB6A),ENSBTAG00000000027(IGFL1),ENSBTAG00000000030(RDM1),ENSBTAG00000000031(TRPV4),ENSBTAG00000000032(ABI3),ENSBTAG0000000003…
MF	GO:0005515	protein binding	< 1e-30	1.835e-28	ENSBTAG00000000010(UBL7),ENSBTAG00000000011(TDH),ENSBTAG00000000012(TTC33),ENSBTAG00000000016(LTA),ENSBTAG00000000020(TRPV3),ENSBTAG00000000022(NUP37),ENSBTAG00000000023(RNF2),ENSBTAG00000000025(RAB6A),ENSBTAG00000000027(IGFL1),ENSBTAG00000000031(TRPV4),ENSBTAG00000000032(ABI3),ENSBTAG00000000040(MAFG),ENSBTAG00000000042(PYCR1),ENSBTAG00000000056(STRADA),ENSBTAG00000000073(LRPAP1),ENSBTAG00000000…
MF	GO:0019899	enzyme binding	< 1e-30	1.835e-28	ENSBTAG00000000031(TRPV4),ENSBTAG00000000056(STRADA),ENSBTAG00000000085(CYP1A2),ENSBTAG00000000113(ARHGEF2),ENSBTAG00000000146(FARP1),ENSBTAG00000000147(RIC8B),ENSBTAG00000000152(RANBP2),ENSBTAG00000000184(EIF2AK3),ENSBTAG00000000203(ATP6V1G1),ENSBTAG00000000215(GNB1),ENSBTAG00000000224(TSPAN15),ENSBTAG00000000225(POLB),ENSBTAG00000000240(AKAP7),ENSBTAG00000000259(CHIA),ENSBTAG00000000267(SMG6),E…
MF	GO:0003824	catalytic activity	< 1e-30	1.835e-28	ENSBTAG00000000005(GRK3),ENSBTAG00000000011(TDH),ENSBTAG00000000013(PRKAA1),ENSBTAG00000000014(TXN2),ENSBTAG00000000023(RNF2),ENSBTAG00000000025(RAB6A),ENSBTAG00000000029(LYZL6),ENSBTAG00000000033(PHOSPHO1),ENSBTAG00000000037(CWC27),ENSBTAG00000000039(SIRT7),ENSBTAG00000000042(PYCR1),ENSBTAG00000000056(STRADA),ENSBTAG00000000062(RASL12),ENSBTAG00000000064(FEN1),ENSBTAG00000000065(CRLS1),ENSBTAG00…
MF	GO:0043167	ion binding	< 1e-30	1.835e-28	ENSBTAG00000000005(GRK3),ENSBTAG00000000013(PRKAA1),ENSBTAG00000000023(RNF2),ENSBTAG00000000025(RAB6A),ENSBTAG00000000039(SIRT7),ENSBTAG00000000056(STRADA),ENSBTAG00000000057(THBS3),ENSBTAG00000000061(PCDH7),ENSBTAG00000000062(RASL12),ENSBTAG00000000064(FEN1),ENSBTAG00000000071(PMP2),ENSBTAG00000000073(LRPAP1),ENSBTAG00000000081(COL4A3BP),ENSBTAG00000000085(CYP1A2),ENSBTAG00000000087(HSD17B12),EN…
MF	GO:0042802	identical protein binding	< 1e-30	1.835e-28	ENSBTAG00000000011(TDH),ENSBTAG00000000031(TRPV4),ENSBTAG00000000032(ABI3),ENSBTAG00000000042(PYCR1),ENSBTAG00000000078(GLIPR2),ENSBTAG00000000088(ALCAM),ENSBTAG00000000092(HIF1AN),ENSBTAG00000000111(UGP2),ENSBTAG00000000184(EIF2AK3),ENSBTAG00000000231(BMPR1A),ENSBTAG00000000251(ALAD),ENSBTAG00000000257(MRAP2),ENSBTAG00000000271(MNS1),ENSBTAG00000000283(CSF1),ENSBTAG00000000286(PFKM),ENSBTAG00000…
MF	GO:0016740	transferase activity	< 1e-30	1.835e-28	ENSBTAG00000000005(GRK3),ENSBTAG00000000013(PRKAA1),ENSBTAG00000000023(RNF2),ENSBTAG00000000056(STRADA),ENSBTAG00000000065(CRLS1),ENSBTAG00000000072(TFB2M),ENSBTAG00000000081(COL4A3BP),ENSBTAG00000000098(SETDB1),ENSBTAG00000000099(CERS2),ENSBTAG00000000111(UGP2),ENSBTAG00000000170(GSTT4),ENSBTAG00000000184(EIF2AK3),ENSBTAG00000000188(HS3ST5),ENSBTAG00000000197(TRMT10A),ENSBTAG00000000201(LTN1),EN…
MF	GO:0043168	anion binding	< 1e-30	1.835e-28	ENSBTAG00000000005(GRK3),ENSBTAG00000000013(PRKAA1),ENSBTAG00000000025(RAB6A),ENSBTAG00000000039(SIRT7),ENSBTAG00000000056(STRADA),ENSBTAG00000000057(THBS3),ENSBTAG00000000062(RASL12),ENSBTAG00000000071(PMP2),ENSBTAG00000000073(LRPAP1),ENSBTAG00000000081(COL4A3BP),ENSBTAG00000000087(HSD17B12),ENSBTAG00000000092(HIF1AN),ENSBTAG00000000105(RIT1),ENSBTAG00000000123(HAO2),ENSBTAG00000000132(EIF4A1),E…
BP	GO:0044237	cellular metabolic process	< 1e-30	1.835e-28	ENSBTAG00000000005(GRK3),ENSBTAG00000000009(FOXF1),ENSBTAG00000000010(UBL7),ENSBTAG00000000011(TDH),ENSBTAG00000000013(PRKAA1),ENSBTAG00000000019(SERINC1),ENSBTAG00000000023(RNF2),ENSBTAG00000000025(RAB6A),ENSBTAG00000000026(VPS33B),ENSBTAG00000000031(TRPV4),ENSBTAG00000000033(PHOSPHO1),ENSBTAG00000000037(CWC27),ENSBTAG00000000039(SIRT7),ENSBTAG00000000040(MAFG),ENSBTAG00000000042(PYCR1),ENSBTAG0…
BP	GO:0008152	metabolic process	< 1e-30	1.835e-28	ENSBTAG00000000005(GRK3),ENSBTAG00000000009(FOXF1),ENSBTAG00000000010(UBL7),ENSBTAG00000000011(TDH),ENSBTAG00000000013(PRKAA1),ENSBTAG00000000014(TXN2),ENSBTAG00000000019(SERINC1),ENSBTAG00000000023(RNF2),ENSBTAG00000000025(RAB6A),ENSBTAG00000000026(VPS33B),ENSBTAG00000000031(TRPV4),ENSBTAG00000000033(PHOSPHO1),ENSBTAG00000000037(CWC27),ENSBTAG00000000039(SIRT7),ENSBTAG00000000040(MAFG),ENSBTAG00…
BP	GO:0048518	positive regulation of biological process	< 1e-30	1.835e-28	ENSBTAG00000000009(FOXF1),ENSBTAG00000000013(PRKAA1),ENSBTAG00000000016(LTA),ENSBTAG00000000031(TRPV4),ENSBTAG00000000039(SIRT7),ENSBTAG00000000040(MAFG),ENSBTAG00000000056(STRADA),ENSBTAG00000000064(FEN1),ENSBTAG00000000072(TFB2M),ENSBTAG00000000074(NFIA),ENSBTAG00000000076(RECK),ENSBTAG00000000078(GLIPR2),ENSBTAG00000000087(HSD17B12),ENSBTAG00000000092(HIF1AN),ENSBTAG00000000095(CD274),ENSBTAG0…
BP	GO:0071704	organic substance metabolic process	< 1e-30	1.835e-28	ENSBTAG00000000005(GRK3),ENSBTAG00000000009(FOXF1),ENSBTAG00000000010(UBL7),ENSBTAG00000000011(TDH),ENSBTAG00000000013(PRKAA1),ENSBTAG00000000014(TXN2),ENSBTAG00000000019(SERINC1),ENSBTAG00000000023(RNF2),ENSBTAG00000000025(RAB6A),ENSBTAG00000000026(VPS33B),ENSBTAG00000000031(TRPV4),ENSBTAG00000000037(CWC27),ENSBTAG00000000039(SIRT7),ENSBTAG00000000040(MAFG),ENSBTAG00000000042(PYCR1),ENSBTAG00000…
BP	GO:0048522	positive regulation of cellular process	< 1e-30	1.835e-28	ENSBTAG00000000009(FOXF1),ENSBTAG00000000013(PRKAA1),ENSBTAG00000000031(TRPV4),ENSBTAG00000000039(SIRT7),ENSBTAG00000000040(MAFG),ENSBTAG00000000056(STRADA),ENSBTAG00000000064(FEN1),ENSBTAG00000000072(TFB2M),ENSBTAG00000000074(NFIA),ENSBTAG00000000076(RECK),ENSBTAG00000000078(GLIPR2),ENSBTAG00000000092(HIF1AN),ENSBTAG00000000095(CD274),ENSBTAG00000000098(SETDB1),ENSBTAG00000000113(ARHGEF2),ENSBTA…
BP	GO:0048519	negative regulation of biological process	< 1e-30	1.835e-28	ENSBTAG00000000009(FOXF1),ENSBTAG00000000013(PRKAA1),ENSBTAG00000000016(LTA),ENSBTAG00000000020(TRPV3),ENSBTAG00000000023(RNF2),ENSBTAG00000000031(TRPV4),ENSBTAG00000000039(SIRT7),ENSBTAG00000000042(PYCR1),ENSBTAG00000000073(LRPAP1),ENSBTAG00000000074(NFIA),ENSBTAG00000000076(RECK),ENSBTAG00000000092(HIF1AN),ENSBTAG00000000095(CD274),ENSBTAG00000000098(SETDB1),ENSBTAG00000000113(ARHGEF2),ENSBTAG0…
BP	GO:0044238	primary metabolic process	< 1e-30	1.835e-28	ENSBTAG00000000005(GRK3),ENSBTAG00000000009(FOXF1),ENSBTAG00000000010(UBL7),ENSBTAG00000000011(TDH),ENSBTAG00000000013(PRKAA1),ENSBTAG00000000019(SERINC1),ENSBTAG00000000023(RNF2),ENSBTAG00000000025(RAB6A),ENSBTAG00000000026(VPS33B),ENSBTAG00000000031(TRPV4),ENSBTAG00000000037(CWC27),ENSBTAG00000000039(SIRT7),ENSBTAG00000000040(MAFG),ENSBTAG00000000042(PYCR1),ENSBTAG00000000054(SNAPC4),ENSBTAG000…
BP	GO:0043412	macromolecule modification	< 1e-30	1.835e-28	ENSBTAG00000000005(GRK3),ENSBTAG00000000013(PRKAA1),ENSBTAG00000000023(RNF2),ENSBTAG00000000025(RAB6A),ENSBTAG00000000026(VPS33B),ENSBTAG00000000031(TRPV4),ENSBTAG00000000037(CWC27),ENSBTAG00000000039(SIRT7),ENSBTAG00000000056(STRADA),ENSBTAG00000000072(TFB2M),ENSBTAG00000000078(GLIPR2),ENSBTAG00000000092(HIF1AN),ENSBTAG00000000098(SETDB1),ENSBTAG00000000113(ARHGEF2),ENSBTAG00000000120(USP43),ENS…
BP	GO:0051179	localization	< 1e-30	1.835e-28	ENSBTAG00000000005(GRK3),ENSBTAG00000000009(FOXF1),ENSBTAG00000000013(PRKAA1),ENSBTAG00000000020(TRPV3),ENSBTAG00000000021(WASHC3),ENSBTAG00000000025(RAB6A),ENSBTAG00000000026(VPS33B),ENSBTAG00000000031(TRPV4),ENSBTAG00000000032(ABI3),ENSBTAG00000000056(STRADA),ENSBTAG00000000073(LRPAP1),ENSBTAG00000000076(RECK),ENSBTAG00000000078(GLIPR2),ENSBTAG00000000081(COL4A3BP),ENSBTAG00000000082(KCNJ14),EN…
BP	GO:0071840	cellular component organization or biogenesis	< 1e-30	1.835e-28	ENSBTAG00000000009(FOXF1),ENSBTAG00000000013(PRKAA1),ENSBTAG00000000021(WASHC3),ENSBTAG00000000023(RNF2),ENSBTAG00000000024(DYM),ENSBTAG00000000026(VPS33B),ENSBTAG00000000031(TRPV4),ENSBTAG00000000039(SIRT7),ENSBTAG00000000056(STRADA),ENSBTAG00000000064(FEN1),ENSBTAG00000000071(PMP2),ENSBTAG00000000072(TFB2M),ENSBTAG00000000073(LRPAP1),ENSBTAG00000000074(NFIA),ENSBTAG00000000076(RECK),ENSBTAG0000…
BP	GO:0016043	cellular component organization	< 1e-30	1.835e-28	ENSBTAG00000000009(FOXF1),ENSBTAG00000000013(PRKAA1),ENSBTAG00000000021(WASHC3),ENSBTAG00000000023(RNF2),ENSBTAG00000000024(DYM),ENSBTAG00000000026(VPS33B),ENSBTAG00000000031(TRPV4),ENSBTAG00000000039(SIRT7),ENSBTAG00000000056(STRADA),ENSBTAG00000000064(FEN1),ENSBTAG00000000071(PMP2),ENSBTAG00000000073(LRPAP1),ENSBTAG00000000074(NFIA),ENSBTAG00000000076(RECK),ENSBTAG00000000077(ADSL),ENSBTAG00000…
BP	GO:0006464	cellular protein modification process	< 1e-30	1.835e-28	ENSBTAG00000000005(GRK3),ENSBTAG00000000013(PRKAA1),ENSBTAG00000000023(RNF2),ENSBTAG00000000025(RAB6A),ENSBTAG00000000026(VPS33B),ENSBTAG00000000031(TRPV4),ENSBTAG00000000037(CWC27),ENSBTAG00000000039(SIRT7),ENSBTAG00000000056(STRADA),ENSBTAG00000000078(GLIPR2),ENSBTAG00000000092(HIF1AN),ENSBTAG00000000098(SETDB1),ENSBTAG00000000113(ARHGEF2),ENSBTAG00000000120(USP43),ENSBTAG00000000128(FGF18),ENS…
BP	GO:0036211	protein modification process	< 1e-30	1.835e-28	ENSBTAG00000000005(GRK3),ENSBTAG00000000013(PRKAA1),ENSBTAG00000000023(RNF2),ENSBTAG00000000025(RAB6A),ENSBTAG00000000026(VPS33B),ENSBTAG00000000031(TRPV4),ENSBTAG00000000037(CWC27),ENSBTAG00000000039(SIRT7),ENSBTAG00000000056(STRADA),ENSBTAG00000000078(GLIPR2),ENSBTAG00000000092(HIF1AN),ENSBTAG00000000098(SETDB1),ENSBTAG00000000113(ARHGEF2),ENSBTAG00000000120(USP43),ENSBTAG00000000128(FGF18),ENS…
BP	GO:0032502	developmental process	< 1e-30	1.835e-28	ENSBTAG00000000009(FOXF1),ENSBTAG00000000013(PRKAA1),ENSBTAG00000000016(LTA),ENSBTAG00000000023(RNF2),ENSBTAG00000000026(VPS33B),ENSBTAG00000000031(TRPV4),ENSBTAG00000000033(PHOSPHO1),ENSBTAG00000000040(MAFG),ENSBTAG00000000056(STRADA),ENSBTAG00000000057(THBS3),ENSBTAG00000000074(NFIA),ENSBTAG00000000076(RECK),ENSBTAG00000000078(GLIPR2),ENSBTAG00000000081(COL4A3BP),ENSBTAG00000000085(CYP1A2),ENSB…
BP	GO:0048523	negative regulation of cellular process	< 1e-30	1.835e-28	ENSBTAG00000000009(FOXF1),ENSBTAG00000000013(PRKAA1),ENSBTAG00000000023(RNF2),ENSBTAG00000000031(TRPV4),ENSBTAG00000000039(SIRT7),ENSBTAG00000000042(PYCR1),ENSBTAG00000000073(LRPAP1),ENSBTAG00000000074(NFIA),ENSBTAG00000000076(RECK),ENSBTAG00000000092(HIF1AN),ENSBTAG00000000095(CD274),ENSBTAG00000000098(SETDB1),ENSBTAG00000000113(ARHGEF2),ENSBTAG00000000163(DDIT4),ENSBTAG00000000164(GNRH1),ENSBTA…
BP	GO:0048856	anatomical structure development	< 1e-30	1.835e-28	ENSBTAG00000000009(FOXF1),ENSBTAG00000000013(PRKAA1),ENSBTAG00000000016(LTA),ENSBTAG00000000023(RNF2),ENSBTAG00000000026(VPS33B),ENSBTAG00000000031(TRPV4),ENSBTAG00000000033(PHOSPHO1),ENSBTAG00000000040(MAFG),ENSBTAG00000000056(STRADA),ENSBTAG00000000057(THBS3),ENSBTAG00000000074(NFIA),ENSBTAG00000000076(RECK),ENSBTAG00000000078(GLIPR2),ENSBTAG00000000081(COL4A3BP),ENSBTAG00000000085(CYP1A2),ENSB…
BP	GO:0048583	regulation of response to stimulus	< 1e-30	1.835e-28	ENSBTAG00000000009(FOXF1),ENSBTAG00000000013(PRKAA1),ENSBTAG00000000016(LTA),ENSBTAG00000000026(VPS33B),ENSBTAG00000000031(TRPV4),ENSBTAG00000000042(PYCR1),ENSBTAG00000000073(LRPAP1),ENSBTAG00000000076(RECK),ENSBTAG00000000078(GLIPR2),ENSBTAG00000000092(HIF1AN),ENSBTAG00000000095(CD274),ENSBTAG00000000113(ARHGEF2),ENSBTAG00000000128(FGF18),ENSBTAG00000000130(TNFSF13),ENSBTAG00000000146(FARP1),ENS…
BP	GO:0006807	nitrogen compound metabolic process	< 1e-30	1.835e-28	ENSBTAG00000000005(GRK3),ENSBTAG00000000009(FOXF1),ENSBTAG00000000010(UBL7),ENSBTAG00000000011(TDH),ENSBTAG00000000013(PRKAA1),ENSBTAG00000000019(SERINC1),ENSBTAG00000000023(RNF2),ENSBTAG00000000025(RAB6A),ENSBTAG00000000026(VPS33B),ENSBTAG00000000031(TRPV4),ENSBTAG00000000037(CWC27),ENSBTAG00000000039(SIRT7),ENSBTAG00000000040(MAFG),ENSBTAG00000000042(PYCR1),ENSBTAG00000000054(SNAPC4),ENSBTAG000…
BP	GO:0007275	multicellular organism development	< 1e-30	1.835e-28	ENSBTAG00000000009(FOXF1),ENSBTAG00000000013(PRKAA1),ENSBTAG00000000016(LTA),ENSBTAG00000000023(RNF2),ENSBTAG00000000026(VPS33B),ENSBTAG00000000031(TRPV4),ENSBTAG00000000033(PHOSPHO1),ENSBTAG00000000040(MAFG),ENSBTAG00000000056(STRADA),ENSBTAG00000000057(THBS3),ENSBTAG00000000074(NFIA),ENSBTAG00000000076(RECK),ENSBTAG00000000078(GLIPR2),ENSBTAG00000000081(COL4A3BP),ENSBTAG00000000085(CYP1A2),ENSB…
BP	GO:0023051	regulation of signaling	< 1e-30	1.835e-28	ENSBTAG00000000013(PRKAA1),ENSBTAG00000000016(LTA),ENSBTAG00000000031(TRPV4),ENSBTAG00000000073(LRPAP1),ENSBTAG00000000076(RECK),ENSBTAG00000000078(GLIPR2),ENSBTAG00000000092(HIF1AN),ENSBTAG00000000113(ARHGEF2),ENSBTAG00000000128(FGF18),ENSBTAG00000000130(TNFSF13),ENSBTAG00000000146(FARP1),ENSBTAG00000000163(DDIT4),ENSBTAG00000000164(GNRH1),ENSBTAG00000000184(EIF2AK3),ENSBTAG00000000218(MAP2K5),E…
BP	GO:0009893	positive regulation of metabolic process	< 1e-30	1.835e-28	ENSBTAG00000000009(FOXF1),ENSBTAG00000000013(PRKAA1),ENSBTAG00000000031(TRPV4),ENSBTAG00000000039(SIRT7),ENSBTAG00000000040(MAFG),ENSBTAG00000000056(STRADA),ENSBTAG00000000072(TFB2M),ENSBTAG00000000074(NFIA),ENSBTAG00000000078(GLIPR2),ENSBTAG00000000098(SETDB1),ENSBTAG00000000113(ARHGEF2),ENSBTAG00000000128(FGF18),ENSBTAG00000000130(TNFSF13),ENSBTAG00000000152(RANBP2),ENSBTAG00000000184(EIF2AK3),…
BP	GO:0010646	regulation of cell communication	< 1e-30	1.835e-28	ENSBTAG00000000013(PRKAA1),ENSBTAG00000000016(LTA),ENSBTAG00000000031(TRPV4),ENSBTAG00000000073(LRPAP1),ENSBTAG00000000076(RECK),ENSBTAG00000000078(GLIPR2),ENSBTAG00000000092(HIF1AN),ENSBTAG00000000113(ARHGEF2),ENSBTAG00000000128(FGF18),ENSBTAG00000000130(TNFSF13),ENSBTAG00000000146(FARP1),ENSBTAG00000000163(DDIT4),ENSBTAG00000000164(GNRH1),ENSBTAG00000000184(EIF2AK3),ENSBTAG00000000218(MAP2K5),E…
BP	GO:0006950	response to stress	< 1e-30	1.835e-28	ENSBTAG00000000009(FOXF1),ENSBTAG00000000013(PRKAA1),ENSBTAG00000000016(LTA),ENSBTAG00000000026(VPS33B),ENSBTAG00000000029(LYZL6),ENSBTAG00000000031(TRPV4),ENSBTAG00000000042(PYCR1),ENSBTAG00000000056(STRADA),ENSBTAG00000000064(FEN1),ENSBTAG00000000067(SDF2L1),ENSBTAG00000000081(COL4A3BP),ENSBTAG00000000092(HIF1AN),ENSBTAG00000000163(DDIT4),ENSBTAG00000000184(EIF2AK3),ENSBTAG00000000218(MAP2K5),E…
BP	GO:1901564	organonitrogen compound metabolic process	< 1e-30	1.835e-28	ENSBTAG00000000005(GRK3),ENSBTAG00000000010(UBL7),ENSBTAG00000000011(TDH),ENSBTAG00000000013(PRKAA1),ENSBTAG00000000019(SERINC1),ENSBTAG00000000023(RNF2),ENSBTAG00000000025(RAB6A),ENSBTAG00000000026(VPS33B),ENSBTAG00000000031(TRPV4),ENSBTAG00000000037(CWC27),ENSBTAG00000000039(SIRT7),ENSBTAG00000000042(PYCR1),ENSBTAG00000000056(STRADA),ENSBTAG00000000067(SDF2L1),ENSBTAG00000000076(RECK),ENSBTAG00…
BP	GO:0043170	macromolecule metabolic process	< 1e-30	1.835e-28	ENSBTAG00000000005(GRK3),ENSBTAG00000000009(FOXF1),ENSBTAG00000000010(UBL7),ENSBTAG00000000013(PRKAA1),ENSBTAG00000000023(RNF2),ENSBTAG00000000025(RAB6A),ENSBTAG00000000026(VPS33B),ENSBTAG00000000031(TRPV4),ENSBTAG00000000037(CWC27),ENSBTAG00000000039(SIRT7),ENSBTAG00000000040(MAFG),ENSBTAG00000000054(SNAPC4),ENSBTAG00000000056(STRADA),ENSBTAG00000000064(FEN1),ENSBTAG00000000067(SDF2L1),ENSBTAG00…
BP	GO:0048731	system development	< 1e-30	1.835e-28	ENSBTAG00000000009(FOXF1),ENSBTAG00000000013(PRKAA1),ENSBTAG00000000016(LTA),ENSBTAG00000000026(VPS33B),ENSBTAG00000000031(TRPV4),ENSBTAG00000000033(PHOSPHO1),ENSBTAG00000000056(STRADA),ENSBTAG00000000057(THBS3),ENSBTAG00000000074(NFIA),ENSBTAG00000000076(RECK),ENSBTAG00000000078(GLIPR2),ENSBTAG00000000081(COL4A3BP),ENSBTAG00000000085(CYP1A2),ENSBTAG00000000088(ALCAM),ENSBTAG00000000095(CD274),EN…
BP	GO:0019222	regulation of metabolic process	< 1e-30	1.835e-28	ENSBTAG00000000009(FOXF1),ENSBTAG00000000013(PRKAA1),ENSBTAG00000000023(RNF2),ENSBTAG00000000031(TRPV4),ENSBTAG00000000039(SIRT7),ENSBTAG00000000040(MAFG),ENSBTAG00000000056(STRADA),ENSBTAG00000000072(TFB2M),ENSBTAG00000000073(LRPAP1),ENSBTAG00000000074(NFIA),ENSBTAG00000000076(RECK),ENSBTAG00000000078(GLIPR2),ENSBTAG00000000085(CYP1A2),ENSBTAG00000000092(HIF1AN),ENSBTAG00000000098(SETDB1),ENSBTA…
BP	GO:0044260	cellular macromolecule metabolic process	< 1e-30	1.835e-28	ENSBTAG00000000005(GRK3),ENSBTAG00000000009(FOXF1),ENSBTAG00000000010(UBL7),ENSBTAG00000000013(PRKAA1),ENSBTAG00000000023(RNF2),ENSBTAG00000000025(RAB6A),ENSBTAG00000000026(VPS33B),ENSBTAG00000000031(TRPV4),ENSBTAG00000000037(CWC27),ENSBTAG00000000039(SIRT7),ENSBTAG00000000040(MAFG),ENSBTAG00000000054(SNAPC4),ENSBTAG00000000056(STRADA),ENSBTAG00000000064(FEN1),ENSBTAG00000000067(SDF2L1),ENSBTAG00…
BP	GO:0051641	cellular localization	< 1e-30	1.835e-28	ENSBTAG00000000009(FOXF1),ENSBTAG00000000013(PRKAA1),ENSBTAG00000000025(RAB6A),ENSBTAG00000000026(VPS33B),ENSBTAG00000000056(STRADA),ENSBTAG00000000081(COL4A3BP),ENSBTAG00000000090(SEC31B),ENSBTAG00000000113(ARHGEF2),ENSBTAG00000000152(RANBP2),ENSBTAG00000000224(TSPAN15),ENSBTAG00000000231(BMPR1A),ENSBTAG00000000243(HEBP2),ENSBTAG00000000257(MRAP2),ENSBTAG00000000264(RFX6),ENSBTAG00000000274(YKT6…
BP	GO:0031325	positive regulation of cellular metabolic process	< 1e-30	1.835e-28	ENSBTAG00000000009(FOXF1),ENSBTAG00000000013(PRKAA1),ENSBTAG00000000031(TRPV4),ENSBTAG00000000039(SIRT7),ENSBTAG00000000040(MAFG),ENSBTAG00000000056(STRADA),ENSBTAG00000000072(TFB2M),ENSBTAG00000000074(NFIA),ENSBTAG00000000078(GLIPR2),ENSBTAG00000000098(SETDB1),ENSBTAG00000000113(ARHGEF2),ENSBTAG00000000128(FGF18),ENSBTAG00000000130(TNFSF13),ENSBTAG00000000152(RANBP2),ENSBTAG00000000184(EIF2AK3),…
BP	GO:0009966	regulation of signal transduction	< 1e-30	1.835e-28	ENSBTAG00000000013(PRKAA1),ENSBTAG00000000016(LTA),ENSBTAG00000000031(TRPV4),ENSBTAG00000000073(LRPAP1),ENSBTAG00000000076(RECK),ENSBTAG00000000078(GLIPR2),ENSBTAG00000000092(HIF1AN),ENSBTAG00000000113(ARHGEF2),ENSBTAG00000000128(FGF18),ENSBTAG00000000130(TNFSF13),ENSBTAG00000000146(FARP1),ENSBTAG00000000163(DDIT4),ENSBTAG00000000164(GNRH1),ENSBTAG00000000184(EIF2AK3),ENSBTAG00000000218(MAP2K5),E…
BP	GO:0010604	positive regulation of macromolecule metabolic process	< 1e-30	1.835e-28	ENSBTAG00000000009(FOXF1),ENSBTAG00000000013(PRKAA1),ENSBTAG00000000031(TRPV4),ENSBTAG00000000039(SIRT7),ENSBTAG00000000040(MAFG),ENSBTAG00000000056(STRADA),ENSBTAG00000000072(TFB2M),ENSBTAG00000000074(NFIA),ENSBTAG00000000078(GLIPR2),ENSBTAG00000000098(SETDB1),ENSBTAG00000000113(ARHGEF2),ENSBTAG00000000128(FGF18),ENSBTAG00000000130(TNFSF13),ENSBTAG00000000184(EIF2AK3),ENSBTAG00000000205(MMD),ENS…
BP	GO:0070887	cellular response to chemical stimulus	< 1e-30	1.835e-28	ENSBTAG00000000009(FOXF1),ENSBTAG00000000013(PRKAA1),ENSBTAG00000000031(TRPV4),ENSBTAG00000000042(PYCR1),ENSBTAG00000000067(SDF2L1),ENSBTAG00000000085(CYP1A2),ENSBTAG00000000092(HIF1AN),ENSBTAG00000000095(CD274),ENSBTAG00000000102(GPR75),ENSBTAG00000000113(ARHGEF2),ENSBTAG00000000128(FGF18),ENSBTAG00000000163(DDIT4),ENSBTAG00000000184(EIF2AK3),ENSBTAG00000000203(ATP6V1G1),ENSBTAG00000000215(GNB1)…
BP	GO:0006793	phosphorus metabolic process	< 1e-30	1.835e-28	ENSBTAG00000000005(GRK3),ENSBTAG00000000013(PRKAA1),ENSBTAG00000000019(SERINC1),ENSBTAG00000000031(TRPV4),ENSBTAG00000000033(PHOSPHO1),ENSBTAG00000000056(STRADA),ENSBTAG00000000065(CRLS1),ENSBTAG00000000077(ADSL),ENSBTAG00000000078(GLIPR2),ENSBTAG00000000081(COL4A3BP),ENSBTAG00000000091(NDUFB8),ENSBTAG00000000111(UGP2),ENSBTAG00000000113(ARHGEF2),ENSBTAG00000000128(FGF18),ENSBTAG00000000152(RANBP…
BP	GO:0051173	positive regulation of nitrogen compound metabolic process	< 1e-30	1.835e-28	ENSBTAG00000000009(FOXF1),ENSBTAG00000000013(PRKAA1),ENSBTAG00000000031(TRPV4),ENSBTAG00000000039(SIRT7),ENSBTAG00000000040(MAFG),ENSBTAG00000000056(STRADA),ENSBTAG00000000072(TFB2M),ENSBTAG00000000074(NFIA),ENSBTAG00000000078(GLIPR2),ENSBTAG00000000098(SETDB1),ENSBTAG00000000113(ARHGEF2),ENSBTAG00000000128(FGF18),ENSBTAG00000000130(TNFSF13),ENSBTAG00000000184(EIF2AK3),ENSBTAG00000000205(MMD),ENS…
BP	GO:0033554	cellular response to stress	< 1e-30	1.835e-28	ENSBTAG00000000013(PRKAA1),ENSBTAG00000000031(TRPV4),ENSBTAG00000000042(PYCR1),ENSBTAG00000000056(STRADA),ENSBTAG00000000064(FEN1),ENSBTAG00000000067(SDF2L1),ENSBTAG00000000081(COL4A3BP),ENSBTAG00000000092(HIF1AN),ENSBTAG00000000163(DDIT4),ENSBTAG00000000184(EIF2AK3),ENSBTAG00000000218(MAP2K5),ENSBTAG00000000225(POLB),ENSBTAG00000000231(BMPR1A),ENSBTAG00000000252(POLE3),ENSBTAG00000000253(PTPRF),…
BP	GO:0006796	phosphate-containing compound metabolic process	< 1e-30	1.835e-28	ENSBTAG00000000005(GRK3),ENSBTAG00000000013(PRKAA1),ENSBTAG00000000019(SERINC1),ENSBTAG00000000031(TRPV4),ENSBTAG00000000033(PHOSPHO1),ENSBTAG00000000056(STRADA),ENSBTAG00000000065(CRLS1),ENSBTAG00000000077(ADSL),ENSBTAG00000000078(GLIPR2),ENSBTAG00000000081(COL4A3BP),ENSBTAG00000000091(NDUFB8),ENSBTAG00000000113(ARHGEF2),ENSBTAG00000000128(FGF18),ENSBTAG00000000152(RANBP2),ENSBTAG00000000163(DDI…
BP	GO:0065008	regulation of biological quality	< 1e-30	1.835e-28	ENSBTAG00000000013(PRKAA1),ENSBTAG00000000014(TXN2),ENSBTAG00000000026(VPS33B),ENSBTAG00000000031(TRPV4),ENSBTAG00000000042(PYCR1),ENSBTAG00000000081(COL4A3BP),ENSBTAG00000000149(USP40),ENSBTAG00000000203(ATP6V1G1),ENSBTAG00000000225(POLB),ENSBTAG00000000241(STAU1),ENSBTAG00000000243(HEBP2),ENSBTAG00000000257(MRAP2),ENSBTAG00000000264(RFX6),ENSBTAG00000000267(SMG6),ENSBTAG00000000283(CSF1),ENSBTA…
BP	GO:0033036	macromolecule localization	< 1e-30	1.835e-28	ENSBTAG00000000013(PRKAA1),ENSBTAG00000000025(RAB6A),ENSBTAG00000000026(VPS33B),ENSBTAG00000000031(TRPV4),ENSBTAG00000000056(STRADA),ENSBTAG00000000081(COL4A3BP),ENSBTAG00000000090(SEC31B),ENSBTAG00000000095(CD274),ENSBTAG00000000152(RANBP2),ENSBTAG00000000205(MMD),ENSBTAG00000000224(TSPAN15),ENSBTAG00000000231(BMPR1A),ENSBTAG00000000257(MRAP2),ENSBTAG00000000259(CHIA),ENSBTAG00000000264(RFX6),EN…
BP	GO:0051246	regulation of protein metabolic process	< 1e-30	1.835e-28	ENSBTAG00000000013(PRKAA1),ENSBTAG00000000031(TRPV4),ENSBTAG00000000056(STRADA),ENSBTAG00000000076(RECK),ENSBTAG00000000078(GLIPR2),ENSBTAG00000000113(ARHGEF2),ENSBTAG00000000128(FGF18),ENSBTAG00000000163(DDIT4),ENSBTAG00000000182(SPINT2),ENSBTAG00000000184(EIF2AK3),ENSBTAG00000000201(LTN1),ENSBTAG00000000205(MMD),ENSBTAG00000000218(MAP2K5),ENSBTAG00000000231(BMPR1A),ENSBTAG00000000251(ALAD),ENSB…
BP	GO:0044267	cellular protein metabolic process	< 1e-30	1.835e-28	ENSBTAG00000000005(GRK3),ENSBTAG00000000010(UBL7),ENSBTAG00000000013(PRKAA1),ENSBTAG00000000023(RNF2),ENSBTAG00000000025(RAB6A),ENSBTAG00000000026(VPS33B),ENSBTAG00000000031(TRPV4),ENSBTAG00000000037(CWC27),ENSBTAG00000000039(SIRT7),ENSBTAG00000000056(STRADA),ENSBTAG00000000067(SDF2L1),ENSBTAG00000000076(RECK),ENSBTAG00000000078(GLIPR2),ENSBTAG00000000092(HIF1AN),ENSBTAG00000000098(SETDB1),ENSBTA…
BP	GO:0019538	protein metabolic process	< 1e-30	1.835e-28	ENSBTAG00000000005(GRK3),ENSBTAG00000000010(UBL7),ENSBTAG00000000013(PRKAA1),ENSBTAG00000000023(RNF2),ENSBTAG00000000025(RAB6A),ENSBTAG00000000026(VPS33B),ENSBTAG00000000031(TRPV4),ENSBTAG00000000037(CWC27),ENSBTAG00000000039(SIRT7),ENSBTAG00000000056(STRADA),ENSBTAG00000000067(SDF2L1),ENSBTAG00000000076(RECK),ENSBTAG00000000078(GLIPR2),ENSBTAG00000000092(HIF1AN),ENSBTAG00000000098(SETDB1),ENSBTA…
BP	GO:0060255	regulation of macromolecule metabolic process	< 1e-30	1.835e-28	ENSBTAG00000000009(FOXF1),ENSBTAG00000000013(PRKAA1),ENSBTAG00000000023(RNF2),ENSBTAG00000000031(TRPV4),ENSBTAG00000000039(SIRT7),ENSBTAG00000000040(MAFG),ENSBTAG00000000056(STRADA),ENSBTAG00000000072(TFB2M),ENSBTAG00000000073(LRPAP1),ENSBTAG00000000074(NFIA),ENSBTAG00000000076(RECK),ENSBTAG00000000078(GLIPR2),ENSBTAG00000000085(CYP1A2),ENSBTAG00000000092(HIF1AN),ENSBTAG00000000098(SETDB1),ENSBTA…
BP	GO:0031323	regulation of cellular metabolic process	< 1e-30	1.835e-28	ENSBTAG00000000009(FOXF1),ENSBTAG00000000013(PRKAA1),ENSBTAG00000000023(RNF2),ENSBTAG00000000031(TRPV4),ENSBTAG00000000039(SIRT7),ENSBTAG00000000040(MAFG),ENSBTAG00000000056(STRADA),ENSBTAG00000000072(TFB2M),ENSBTAG00000000073(LRPAP1),ENSBTAG00000000074(NFIA),ENSBTAG00000000076(RECK),ENSBTAG00000000078(GLIPR2),ENSBTAG00000000092(HIF1AN),ENSBTAG00000000098(SETDB1),ENSBTAG00000000113(ARHGEF2),ENSBT…
BP	GO:0048869	cellular developmental process	< 1e-30	1.835e-28	ENSBTAG00000000009(FOXF1),ENSBTAG00000000023(RNF2),ENSBTAG00000000026(VPS33B),ENSBTAG00000000031(TRPV4),ENSBTAG00000000040(MAFG),ENSBTAG00000000056(STRADA),ENSBTAG00000000076(RECK),ENSBTAG00000000078(GLIPR2),ENSBTAG00000000081(COL4A3BP),ENSBTAG00000000088(ALCAM),ENSBTAG00000000092(HIF1AN),ENSBTAG00000000109(NPTXR),ENSBTAG00000000113(ARHGEF2),ENSBTAG00000000124(DHH),ENSBTAG00000000128(FGF18),ENSBT…
BP	GO:0080090	regulation of primary metabolic process	< 1e-30	1.835e-28	ENSBTAG00000000009(FOXF1),ENSBTAG00000000013(PRKAA1),ENSBTAG00000000023(RNF2),ENSBTAG00000000031(TRPV4),ENSBTAG00000000039(SIRT7),ENSBTAG00000000040(MAFG),ENSBTAG00000000056(STRADA),ENSBTAG00000000072(TFB2M),ENSBTAG00000000074(NFIA),ENSBTAG00000000076(RECK),ENSBTAG00000000078(GLIPR2),ENSBTAG00000000092(HIF1AN),ENSBTAG00000000098(SETDB1),ENSBTAG00000000113(ARHGEF2),ENSBTAG00000000124(DHH),ENSBTAG0…
BP	GO:0006996	organelle organization	< 1e-30	1.835e-28	ENSBTAG00000000013(PRKAA1),ENSBTAG00000000021(WASHC3),ENSBTAG00000000023(RNF2),ENSBTAG00000000024(DYM),ENSBTAG00000000026(VPS33B),ENSBTAG00000000031(TRPV4),ENSBTAG00000000039(SIRT7),ENSBTAG00000000064(FEN1),ENSBTAG00000000080(GRWD1),ENSBTAG00000000081(COL4A3BP),ENSBTAG00000000090(SEC31B),ENSBTAG00000000091(NDUFB8),ENSBTAG00000000094(ATPAF1),ENSBTAG00000000098(SETDB1),ENSBTAG00000000113(ARHGEF2),E…
BP	GO:0051234	establishment of localization	< 1e-30	1.835e-28	ENSBTAG00000000005(GRK3),ENSBTAG00000000009(FOXF1),ENSBTAG00000000013(PRKAA1),ENSBTAG00000000020(TRPV3),ENSBTAG00000000021(WASHC3),ENSBTAG00000000025(RAB6A),ENSBTAG00000000026(VPS33B),ENSBTAG00000000031(TRPV4),ENSBTAG00000000056(STRADA),ENSBTAG00000000073(LRPAP1),ENSBTAG00000000081(COL4A3BP),ENSBTAG00000000082(KCNJ14),ENSBTAG00000000090(SEC31B),ENSBTAG00000000095(CD274),ENSBTAG00000000113(ARHGEF2…
BP	GO:0010033	response to organic substance	< 1e-30	1.835e-28	ENSBTAG00000000009(FOXF1),ENSBTAG00000000013(PRKAA1),ENSBTAG00000000031(TRPV4),ENSBTAG00000000067(SDF2L1),ENSBTAG00000000095(CD274),ENSBTAG00000000102(GPR75),ENSBTAG00000000113(ARHGEF2),ENSBTAG00000000128(FGF18),ENSBTAG00000000140(EPHX1),ENSBTAG00000000163(DDIT4),ENSBTAG00000000164(GNRH1),ENSBTAG00000000184(EIF2AK3),ENSBTAG00000000215(GNB1),ENSBTAG00000000231(BMPR1A),ENSBTAG00000000251(ALAD),ENSB…
BP	GO:0051239	regulation of multicellular organismal process	< 1e-30	1.835e-28	ENSBTAG00000000013(PRKAA1),ENSBTAG00000000016(LTA),ENSBTAG00000000020(TRPV3),ENSBTAG00000000026(VPS33B),ENSBTAG00000000031(TRPV4),ENSBTAG00000000040(MAFG),ENSBTAG00000000073(LRPAP1),ENSBTAG00000000076(RECK),ENSBTAG00000000078(GLIPR2),ENSBTAG00000000095(CD274),ENSBTAG00000000113(ARHGEF2),ENSBTAG00000000128(FGF18),ENSBTAG00000000130(TNFSF13),ENSBTAG00000000164(GNRH1),ENSBTAG00000000184(EIF2AK3),ENS…
BP	GO:0008104	protein localization	< 1e-30	1.835e-28	ENSBTAG00000000013(PRKAA1),ENSBTAG00000000025(RAB6A),ENSBTAG00000000026(VPS33B),ENSBTAG00000000031(TRPV4),ENSBTAG00000000056(STRADA),ENSBTAG00000000090(SEC31B),ENSBTAG00000000095(CD274),ENSBTAG00000000152(RANBP2),ENSBTAG00000000205(MMD),ENSBTAG00000000224(TSPAN15),ENSBTAG00000000231(BMPR1A),ENSBTAG00000000257(MRAP2),ENSBTAG00000000259(CHIA),ENSBTAG00000000264(RFX6),ENSBTAG00000000274(YKT6),ENSBTA…
BP	GO:0035556	intracellular signal transduction	< 1e-30	1.835e-28	ENSBTAG00000000013(PRKAA1),ENSBTAG00000000025(RAB6A),ENSBTAG00000000031(TRPV4),ENSBTAG00000000056(STRADA),ENSBTAG00000000078(GLIPR2),ENSBTAG00000000098(SETDB1),ENSBTAG00000000105(RIT1),ENSBTAG00000000113(ARHGEF2),ENSBTAG00000000128(FGF18),ENSBTAG00000000146(FARP1),ENSBTAG00000000163(DDIT4),ENSBTAG00000000184(EIF2AK3),ENSBTAG00000000210(ARHGAP31),ENSBTAG00000000215(GNB1),ENSBTAG00000000218(MAP2K5)…
BP	GO:0009056	catabolic process	< 1e-30	1.835e-28	ENSBTAG00000000010(UBL7),ENSBTAG00000000011(TDH),ENSBTAG00000000013(PRKAA1),ENSBTAG00000000064(FEN1),ENSBTAG00000000067(SDF2L1),ENSBTAG00000000085(CYP1A2),ENSBTAG00000000120(USP43),ENSBTAG00000000140(EPHX1),ENSBTAG00000000149(USP40),ENSBTAG00000000163(DDIT4),ENSBTAG00000000201(LTN1),ENSBTAG00000000251(ALAD),ENSBTAG00000000259(CHIA),ENSBTAG00000000267(SMG6),ENSBTAG00000000279(RAB26),ENSBTAG0000000…
BP	GO:0051649	establishment of localization in cell	< 1e-30	1.835e-28	ENSBTAG00000000009(FOXF1),ENSBTAG00000000013(PRKAA1),ENSBTAG00000000025(RAB6A),ENSBTAG00000000026(VPS33B),ENSBTAG00000000056(STRADA),ENSBTAG00000000081(COL4A3BP),ENSBTAG00000000090(SEC31B),ENSBTAG00000000113(ARHGEF2),ENSBTAG00000000152(RANBP2),ENSBTAG00000000231(BMPR1A),ENSBTAG00000000243(HEBP2),ENSBTAG00000000264(RFX6),ENSBTAG00000000274(YKT6),ENSBTAG00000000279(RAB26),ENSBTAG00000000411(HGS),EN…
BP	GO:0051171	regulation of nitrogen compound metabolic process	< 1e-30	1.835e-28	ENSBTAG00000000009(FOXF1),ENSBTAG00000000013(PRKAA1),ENSBTAG00000000023(RNF2),ENSBTAG00000000031(TRPV4),ENSBTAG00000000039(SIRT7),ENSBTAG00000000040(MAFG),ENSBTAG00000000056(STRADA),ENSBTAG00000000072(TFB2M),ENSBTAG00000000074(NFIA),ENSBTAG00000000076(RECK),ENSBTAG00000000078(GLIPR2),ENSBTAG00000000092(HIF1AN),ENSBTAG00000000098(SETDB1),ENSBTAG00000000113(ARHGEF2),ENSBTAG00000000128(FGF18),ENSBTA…
BP	GO:0032268	regulation of cellular protein metabolic process	< 1e-30	1.835e-28	ENSBTAG00000000013(PRKAA1),ENSBTAG00000000031(TRPV4),ENSBTAG00000000056(STRADA),ENSBTAG00000000076(RECK),ENSBTAG00000000078(GLIPR2),ENSBTAG00000000113(ARHGEF2),ENSBTAG00000000128(FGF18),ENSBTAG00000000163(DDIT4),ENSBTAG00000000182(SPINT2),ENSBTAG00000000184(EIF2AK3),ENSBTAG00000000201(LTN1),ENSBTAG00000000205(MMD),ENSBTAG00000000218(MAP2K5),ENSBTAG00000000231(BMPR1A),ENSBTAG00000000251(ALAD),ENSB…
BP	GO:0006810	transport	< 1e-30	1.835e-28	ENSBTAG00000000005(GRK3),ENSBTAG00000000009(FOXF1),ENSBTAG00000000013(PRKAA1),ENSBTAG00000000020(TRPV3),ENSBTAG00000000021(WASHC3),ENSBTAG00000000025(RAB6A),ENSBTAG00000000026(VPS33B),ENSBTAG00000000031(TRPV4),ENSBTAG00000000056(STRADA),ENSBTAG00000000073(LRPAP1),ENSBTAG00000000081(COL4A3BP),ENSBTAG00000000082(KCNJ14),ENSBTAG00000000090(SEC31B),ENSBTAG00000000095(CD274),ENSBTAG00000000152(RANBP2)…
BP	GO:0030154	cell differentiation	< 1e-30	1.835e-28	ENSBTAG00000000009(FOXF1),ENSBTAG00000000023(RNF2),ENSBTAG00000000026(VPS33B),ENSBTAG00000000031(TRPV4),ENSBTAG00000000040(MAFG),ENSBTAG00000000056(STRADA),ENSBTAG00000000076(RECK),ENSBTAG00000000078(GLIPR2),ENSBTAG00000000088(ALCAM),ENSBTAG00000000092(HIF1AN),ENSBTAG00000000109(NPTXR),ENSBTAG00000000113(ARHGEF2),ENSBTAG00000000124(DHH),ENSBTAG00000000128(FGF18),ENSBTAG00000000137(FRYL),ENSBTAG00…
BP	GO:0071702	organic substance transport	< 1e-30	1.835e-28	ENSBTAG00000000013(PRKAA1),ENSBTAG00000000025(RAB6A),ENSBTAG00000000026(VPS33B),ENSBTAG00000000031(TRPV4),ENSBTAG00000000056(STRADA),ENSBTAG00000000081(COL4A3BP),ENSBTAG00000000090(SEC31B),ENSBTAG00000000095(CD274),ENSBTAG00000000152(RANBP2),ENSBTAG00000000202(SLC25A19),ENSBTAG00000000231(BMPR1A),ENSBTAG00000000259(CHIA),ENSBTAG00000000264(RFX6),ENSBTAG00000000274(YKT6),ENSBTAG00000000279(RAB26),…
BP	GO:0071310	cellular response to organic substance	< 1e-30	1.835e-28	ENSBTAG00000000009(FOXF1),ENSBTAG00000000013(PRKAA1),ENSBTAG00000000067(SDF2L1),ENSBTAG00000000095(CD274),ENSBTAG00000000102(GPR75),ENSBTAG00000000113(ARHGEF2),ENSBTAG00000000128(FGF18),ENSBTAG00000000163(DDIT4),ENSBTAG00000000184(EIF2AK3),ENSBTAG00000000215(GNB1),ENSBTAG00000000231(BMPR1A),ENSBTAG00000000251(ALAD),ENSBTAG00000000264(RFX6),ENSBTAG00000000273(IL5RA),ENSBTAG00000000283(CSF1),ENSBTA…
BP	GO:0050793	regulation of developmental process	< 1e-30	1.835e-28	ENSBTAG00000000009(FOXF1),ENSBTAG00000000013(PRKAA1),ENSBTAG00000000031(TRPV4),ENSBTAG00000000040(MAFG),ENSBTAG00000000076(RECK),ENSBTAG00000000078(GLIPR2),ENSBTAG00000000092(HIF1AN),ENSBTAG00000000095(CD274),ENSBTAG00000000113(ARHGEF2),ENSBTAG00000000128(FGF18),ENSBTAG00000000130(TNFSF13),ENSBTAG00000000164(GNRH1),ENSBTAG00000000205(MMD),ENSBTAG00000000231(BMPR1A),ENSBTAG00000000253(PTPRF),ENSBT…
BP	GO:0071705	nitrogen compound transport	< 1e-30	1.835e-28	ENSBTAG00000000013(PRKAA1),ENSBTAG00000000025(RAB6A),ENSBTAG00000000026(VPS33B),ENSBTAG00000000031(TRPV4),ENSBTAG00000000056(STRADA),ENSBTAG00000000081(COL4A3BP),ENSBTAG00000000090(SEC31B),ENSBTAG00000000095(CD274),ENSBTAG00000000152(RANBP2),ENSBTAG00000000202(SLC25A19),ENSBTAG00000000231(BMPR1A),ENSBTAG00000000259(CHIA),ENSBTAG00000000264(RFX6),ENSBTAG00000000274(YKT6),ENSBTAG00000000279(RAB26),…
BP	GO:0044248	cellular catabolic process	< 1e-30	1.835e-28	ENSBTAG00000000010(UBL7),ENSBTAG00000000011(TDH),ENSBTAG00000000013(PRKAA1),ENSBTAG00000000064(FEN1),ENSBTAG00000000067(SDF2L1),ENSBTAG00000000085(CYP1A2),ENSBTAG00000000120(USP43),ENSBTAG00000000140(EPHX1),ENSBTAG00000000149(USP40),ENSBTAG00000000201(LTN1),ENSBTAG00000000251(ALAD),ENSBTAG00000000267(SMG6),ENSBTAG00000000286(PFKM),ENSBTAG00000000287(GNPDA2),ENSBTAG00000000288(UPF2),ENSBTAG0000000…
BP	GO:0016310	phosphorylation	< 1e-30	1.835e-28	ENSBTAG00000000005(GRK3),ENSBTAG00000000013(PRKAA1),ENSBTAG00000000031(TRPV4),ENSBTAG00000000056(STRADA),ENSBTAG00000000078(GLIPR2),ENSBTAG00000000081(COL4A3BP),ENSBTAG00000000091(NDUFB8),ENSBTAG00000000113(ARHGEF2),ENSBTAG00000000128(FGF18),ENSBTAG00000000152(RANBP2),ENSBTAG00000000163(DDIT4),ENSBTAG00000000184(EIF2AK3),ENSBTAG00000000205(MMD),ENSBTAG00000000212(NADK),ENSBTAG00000000218(MAP2K5),…
BP	GO:0032879	regulation of localization	< 1e-30	1.835e-28	ENSBTAG00000000009(FOXF1),ENSBTAG00000000013(PRKAA1),ENSBTAG00000000031(TRPV4),ENSBTAG00000000032(ABI3),ENSBTAG00000000073(LRPAP1),ENSBTAG00000000076(RECK),ENSBTAG00000000078(GLIPR2),ENSBTAG00000000082(KCNJ14),ENSBTAG00000000095(CD274),ENSBTAG00000000113(ARHGEF2),ENSBTAG00000000128(FGF18),ENSBTAG00000000164(GNRH1),ENSBTAG00000000182(SPINT2),ENSBTAG00000000205(MMD),ENSBTAG00000000231(BMPR1A),ENSBT…
BP	GO:0065009	regulation of molecular function	< 1e-30	1.835e-28	ENSBTAG00000000016(LTA),ENSBTAG00000000023(RNF2),ENSBTAG00000000056(STRADA),ENSBTAG00000000073(LRPAP1),ENSBTAG00000000076(RECK),ENSBTAG00000000113(ARHGEF2),ENSBTAG00000000128(FGF18),ENSBTAG00000000130(TNFSF13),ENSBTAG00000000147(RIC8B),ENSBTAG00000000152(RANBP2),ENSBTAG00000000164(GNRH1),ENSBTAG00000000182(SPINT2),ENSBTAG00000000199(PDP1),ENSBTAG00000000205(MMD),ENSBTAG00000000210(ARHGAP31),ENSBT…
BP	GO:0008219	cell death	< 1e-30	1.835e-28	ENSBTAG00000000013(PRKAA1),ENSBTAG00000000042(PYCR1),ENSBTAG00000000073(LRPAP1),ENSBTAG00000000095(CD274),ENSBTAG00000000102(GPR75),ENSBTAG00000000163(DDIT4),ENSBTAG00000000184(EIF2AK3),ENSBTAG00000000225(POLB),ENSBTAG00000000243(HEBP2),ENSBTAG00000000283(CSF1),ENSBTAG00000000292(TCIRG1),ENSBTAG00000000312(GRINA),ENSBTAG00000000317(MAPK8IP1),ENSBTAG00000000329(MEGF10),ENSBTAG00000000340(ADNP),ENS…
BP	GO:1901575	organic substance catabolic process	< 1e-30	1.835e-28	ENSBTAG00000000010(UBL7),ENSBTAG00000000011(TDH),ENSBTAG00000000013(PRKAA1),ENSBTAG00000000064(FEN1),ENSBTAG00000000067(SDF2L1),ENSBTAG00000000085(CYP1A2),ENSBTAG00000000120(USP43),ENSBTAG00000000149(USP40),ENSBTAG00000000163(DDIT4),ENSBTAG00000000201(LTN1),ENSBTAG00000000251(ALAD),ENSBTAG00000000259(CHIA),ENSBTAG00000000267(SMG6),ENSBTAG00000000279(RAB26),ENSBTAG00000000286(PFKM),ENSBTAG00000000…
BP	GO:0046907	intracellular transport	< 1e-30	1.835e-28	ENSBTAG00000000009(FOXF1),ENSBTAG00000000013(PRKAA1),ENSBTAG00000000025(RAB6A),ENSBTAG00000000026(VPS33B),ENSBTAG00000000056(STRADA),ENSBTAG00000000081(COL4A3BP),ENSBTAG00000000090(SEC31B),ENSBTAG00000000152(RANBP2),ENSBTAG00000000231(BMPR1A),ENSBTAG00000000243(HEBP2),ENSBTAG00000000274(YKT6),ENSBTAG00000000279(RAB26),ENSBTAG00000000411(HGS),ENSBTAG00000000415(ERBIN),ENSBTAG00000000428(BAK1),ENSB…
BP	GO:0045184	establishment of protein localization	< 1e-30	1.835e-28	ENSBTAG00000000013(PRKAA1),ENSBTAG00000000025(RAB6A),ENSBTAG00000000026(VPS33B),ENSBTAG00000000031(TRPV4),ENSBTAG00000000056(STRADA),ENSBTAG00000000090(SEC31B),ENSBTAG00000000095(CD274),ENSBTAG00000000152(RANBP2),ENSBTAG00000000231(BMPR1A),ENSBTAG00000000259(CHIA),ENSBTAG00000000264(RFX6),ENSBTAG00000000274(YKT6),ENSBTAG00000000279(RAB26),ENSBTAG00000000286(PFKM),ENSBTAG00000000292(TCIRG1),ENSBTA…
BP	GO:0051128	regulation of cellular component organization	< 1e-30	1.835e-28	ENSBTAG00000000013(PRKAA1),ENSBTAG00000000064(FEN1),ENSBTAG00000000073(LRPAP1),ENSBTAG00000000098(SETDB1),ENSBTAG00000000113(ARHGEF2),ENSBTAG00000000253(PTPRF),ENSBTAG00000000267(SMG6),ENSBTAG00000000271(MNS1),ENSBTAG00000000305(LMO4),ENSBTAG00000000322(CD2AP),ENSBTAG00000000343(ZNHIT1),ENSBTAG00000000347(RHOG),ENSBTAG00000000369(EPS8),ENSBTAG00000000483(HYAL1),ENSBTAG00000000484(HYAL2),ENSBTAG00…
CC	GO:0044424	intracellular part	< 1e-30	1.835e-28	ENSBTAG00000000009(FOXF1),ENSBTAG00000000010(UBL7),ENSBTAG00000000011(TDH),ENSBTAG00000000013(PRKAA1),ENSBTAG00000000014(TXN2),ENSBTAG00000000019(SERINC1),ENSBTAG00000000021(WASHC3),ENSBTAG00000000022(NUP37),ENSBTAG00000000023(RNF2),ENSBTAG00000000024(DYM),ENSBTAG00000000025(RAB6A),ENSBTAG00000000026(VPS33B),ENSBTAG00000000030(RDM1),ENSBTAG00000000032(ABI3),ENSBTAG00000000037(CWC27),ENSBTAG000000…
CC	GO:0005737	cytoplasm	< 1e-30	1.835e-28	ENSBTAG00000000010(UBL7),ENSBTAG00000000011(TDH),ENSBTAG00000000013(PRKAA1),ENSBTAG00000000014(TXN2),ENSBTAG00000000019(SERINC1),ENSBTAG00000000021(WASHC3),ENSBTAG00000000024(DYM),ENSBTAG00000000025(RAB6A),ENSBTAG00000000026(VPS33B),ENSBTAG00000000030(RDM1),ENSBTAG00000000032(ABI3),ENSBTAG00000000039(SIRT7),ENSBTAG00000000042(PYCR1),ENSBTAG00000000044(MYADML2),ENSBTAG00000000056(STRADA),ENSBTAG00…
CC	GO:0005622	intracellular	< 1e-30	1.835e-28	ENSBTAG00000000009(FOXF1),ENSBTAG00000000010(UBL7),ENSBTAG00000000011(TDH),ENSBTAG00000000013(PRKAA1),ENSBTAG00000000014(TXN2),ENSBTAG00000000019(SERINC1),ENSBTAG00000000021(WASHC3),ENSBTAG00000000022(NUP37),ENSBTAG00000000023(RNF2),ENSBTAG00000000024(DYM),ENSBTAG00000000025(RAB6A),ENSBTAG00000000026(VPS33B),ENSBTAG00000000030(RDM1),ENSBTAG00000000032(ABI3),ENSBTAG00000000037(CWC27),ENSBTAG000000…
CC	GO:0043227	membrane-bounded organelle	< 1e-30	1.835e-28	ENSBTAG00000000009(FOXF1),ENSBTAG00000000011(TDH),ENSBTAG00000000013(PRKAA1),ENSBTAG00000000014(TXN2),ENSBTAG00000000019(SERINC1),ENSBTAG00000000022(NUP37),ENSBTAG00000000023(RNF2),ENSBTAG00000000024(DYM),ENSBTAG00000000025(RAB6A),ENSBTAG00000000026(VPS33B),ENSBTAG00000000030(RDM1),ENSBTAG00000000033(PHOSPHO1),ENSBTAG00000000037(CWC27),ENSBTAG00000000039(SIRT7),ENSBTAG00000000040(MAFG),ENSBTAG000…
CC	GO:0043231	intracellular membrane-bounded organelle	< 1e-30	1.835e-28	ENSBTAG00000000009(FOXF1),ENSBTAG00000000011(TDH),ENSBTAG00000000013(PRKAA1),ENSBTAG00000000014(TXN2),ENSBTAG00000000019(SERINC1),ENSBTAG00000000022(NUP37),ENSBTAG00000000023(RNF2),ENSBTAG00000000024(DYM),ENSBTAG00000000025(RAB6A),ENSBTAG00000000026(VPS33B),ENSBTAG00000000030(RDM1),ENSBTAG00000000037(CWC27),ENSBTAG00000000039(SIRT7),ENSBTAG00000000040(MAFG),ENSBTAG00000000042(PYCR1),ENSBTAG000000…
CC	GO:0043226	organelle	< 1e-30	1.835e-28	ENSBTAG00000000009(FOXF1),ENSBTAG00000000011(TDH),ENSBTAG00000000013(PRKAA1),ENSBTAG00000000014(TXN2),ENSBTAG00000000019(SERINC1),ENSBTAG00000000022(NUP37),ENSBTAG00000000023(RNF2),ENSBTAG00000000024(DYM),ENSBTAG00000000025(RAB6A),ENSBTAG00000000026(VPS33B),ENSBTAG00000000030(RDM1),ENSBTAG00000000031(TRPV4),ENSBTAG00000000033(PHOSPHO1),ENSBTAG00000000037(CWC27),ENSBTAG00000000039(SIRT7),ENSBTAG00…
CC	GO:0043229	intracellular organelle	< 1e-30	1.835e-28	ENSBTAG00000000009(FOXF1),ENSBTAG00000000011(TDH),ENSBTAG00000000013(PRKAA1),ENSBTAG00000000014(TXN2),ENSBTAG00000000019(SERINC1),ENSBTAG00000000022(NUP37),ENSBTAG00000000023(RNF2),ENSBTAG00000000024(DYM),ENSBTAG00000000025(RAB6A),ENSBTAG00000000026(VPS33B),ENSBTAG00000000030(RDM1),ENSBTAG00000000037(CWC27),ENSBTAG00000000039(SIRT7),ENSBTAG00000000040(MAFG),ENSBTAG00000000042(PYCR1),ENSBTAG000000…
CC	GO:0044444	cytoplasmic part	< 1e-30	1.835e-28	ENSBTAG00000000010(UBL7),ENSBTAG00000000011(TDH),ENSBTAG00000000013(PRKAA1),ENSBTAG00000000014(TXN2),ENSBTAG00000000019(SERINC1),ENSBTAG00000000021(WASHC3),ENSBTAG00000000024(DYM),ENSBTAG00000000025(RAB6A),ENSBTAG00000000026(VPS33B),ENSBTAG00000000030(RDM1),ENSBTAG00000000042(PYCR1),ENSBTAG00000000056(STRADA),ENSBTAG00000000057(THBS3),ENSBTAG00000000064(FEN1),ENSBTAG00000000065(CRLS1),ENSBTAG0000…
CC	GO:0044446	intracellular organelle part	< 1e-30	1.835e-28	ENSBTAG00000000013(PRKAA1),ENSBTAG00000000014(TXN2),ENSBTAG00000000019(SERINC1),ENSBTAG00000000022(NUP37),ENSBTAG00000000023(RNF2),ENSBTAG00000000025(RAB6A),ENSBTAG00000000026(VPS33B),ENSBTAG00000000030(RDM1),ENSBTAG00000000037(CWC27),ENSBTAG00000000039(SIRT7),ENSBTAG00000000049(CCDC77),ENSBTAG00000000053(FILIP1),ENSBTAG00000000054(SNAPC4),ENSBTAG00000000056(STRADA),ENSBTAG00000000064(FEN1),ENSBT…
CC	GO:0044422	organelle part	< 1e-30	1.835e-28	ENSBTAG00000000013(PRKAA1),ENSBTAG00000000014(TXN2),ENSBTAG00000000019(SERINC1),ENSBTAG00000000022(NUP37),ENSBTAG00000000023(RNF2),ENSBTAG00000000025(RAB6A),ENSBTAG00000000026(VPS33B),ENSBTAG00000000030(RDM1),ENSBTAG00000000037(CWC27),ENSBTAG00000000039(SIRT7),ENSBTAG00000000049(CCDC77),ENSBTAG00000000053(FILIP1),ENSBTAG00000000054(SNAPC4),ENSBTAG00000000056(STRADA),ENSBTAG00000000064(FEN1),ENSBT…
CC	GO:0012505	endomembrane system	< 1e-30	1.835e-28	ENSBTAG00000000019(SERINC1),ENSBTAG00000000022(NUP37),ENSBTAG00000000024(DYM),ENSBTAG00000000025(RAB6A),ENSBTAG00000000026(VPS33B),ENSBTAG00000000067(SDF2L1),ENSBTAG00000000073(LRPAP1),ENSBTAG00000000078(GLIPR2),ENSBTAG00000000081(COL4A3BP),ENSBTAG00000000085(CYP1A2),ENSBTAG00000000090(SEC31B),ENSBTAG00000000095(CD274),ENSBTAG00000000099(CERS2),ENSBTAG00000000140(EPHX1),ENSBTAG00000000152(RANBP2)…
CC	GO:0031974	membrane-enclosed lumen	< 1e-30	1.835e-28	ENSBTAG00000000013(PRKAA1),ENSBTAG00000000014(TXN2),ENSBTAG00000000022(NUP37),ENSBTAG00000000023(RNF2),ENSBTAG00000000030(RDM1),ENSBTAG00000000037(CWC27),ENSBTAG00000000039(SIRT7),ENSBTAG00000000053(FILIP1),ENSBTAG00000000056(STRADA),ENSBTAG00000000064(FEN1),ENSBTAG00000000067(SDF2L1),ENSBTAG00000000072(TFB2M),ENSBTAG00000000073(LRPAP1),ENSBTAG00000000074(NFIA),ENSBTAG00000000080(GRWD1),ENSBTAG00…
CC	GO:0043233	organelle lumen	< 1e-30	1.835e-28	ENSBTAG00000000013(PRKAA1),ENSBTAG00000000014(TXN2),ENSBTAG00000000022(NUP37),ENSBTAG00000000023(RNF2),ENSBTAG00000000030(RDM1),ENSBTAG00000000037(CWC27),ENSBTAG00000000039(SIRT7),ENSBTAG00000000053(FILIP1),ENSBTAG00000000056(STRADA),ENSBTAG00000000064(FEN1),ENSBTAG00000000067(SDF2L1),ENSBTAG00000000072(TFB2M),ENSBTAG00000000073(LRPAP1),ENSBTAG00000000074(NFIA),ENSBTAG00000000080(GRWD1),ENSBTAG00…
CC	GO:0070013	intracellular organelle lumen	< 1e-30	1.835e-28	ENSBTAG00000000013(PRKAA1),ENSBTAG00000000014(TXN2),ENSBTAG00000000022(NUP37),ENSBTAG00000000023(RNF2),ENSBTAG00000000030(RDM1),ENSBTAG00000000037(CWC27),ENSBTAG00000000039(SIRT7),ENSBTAG00000000053(FILIP1),ENSBTAG00000000056(STRADA),ENSBTAG00000000064(FEN1),ENSBTAG00000000067(SDF2L1),ENSBTAG00000000072(TFB2M),ENSBTAG00000000073(LRPAP1),ENSBTAG00000000074(NFIA),ENSBTAG00000000080(GRWD1),ENSBTAG00…
CC	GO:0044428	nuclear part	< 1e-30	1.835e-28	ENSBTAG00000000013(PRKAA1),ENSBTAG00000000014(TXN2),ENSBTAG00000000022(NUP37),ENSBTAG00000000023(RNF2),ENSBTAG00000000030(RDM1),ENSBTAG00000000037(CWC27),ENSBTAG00000000039(SIRT7),ENSBTAG00000000053(FILIP1),ENSBTAG00000000054(SNAPC4),ENSBTAG00000000056(STRADA),ENSBTAG00000000064(FEN1),ENSBTAG00000000074(NFIA),ENSBTAG00000000080(GRWD1),ENSBTAG00000000081(COL4A3BP),ENSBTAG00000000092(HIF1AN),ENSBTA…
CC	GO:0005623	cell	< 1e-30	1.835e-28	ENSBTAG00000000009(FOXF1),ENSBTAG00000000010(UBL7),ENSBTAG00000000011(TDH),ENSBTAG00000000013(PRKAA1),ENSBTAG00000000014(TXN2),ENSBTAG00000000019(SERINC1),ENSBTAG00000000020(TRPV3),ENSBTAG00000000021(WASHC3),ENSBTAG00000000022(NUP37),ENSBTAG00000000023(RNF2),ENSBTAG00000000024(DYM),ENSBTAG00000000025(RAB6A),ENSBTAG00000000026(VPS33B),ENSBTAG00000000030(RDM1),ENSBTAG00000000031(TRPV4),ENSBTAG00000…
CC	GO:0031981	nuclear lumen	< 1e-30	1.835e-28	ENSBTAG00000000013(PRKAA1),ENSBTAG00000000014(TXN2),ENSBTAG00000000022(NUP37),ENSBTAG00000000023(RNF2),ENSBTAG00000000030(RDM1),ENSBTAG00000000037(CWC27),ENSBTAG00000000039(SIRT7),ENSBTAG00000000053(FILIP1),ENSBTAG00000000056(STRADA),ENSBTAG00000000064(FEN1),ENSBTAG00000000074(NFIA),ENSBTAG00000000080(GRWD1),ENSBTAG00000000081(COL4A3BP),ENSBTAG00000000092(HIF1AN),ENSBTAG00000000098(SETDB1),ENSBTA…
CC	GO:0044464	cell part	< 1e-30	1.835e-28	ENSBTAG00000000009(FOXF1),ENSBTAG00000000010(UBL7),ENSBTAG00000000011(TDH),ENSBTAG00000000013(PRKAA1),ENSBTAG00000000014(TXN2),ENSBTAG00000000019(SERINC1),ENSBTAG00000000020(TRPV3),ENSBTAG00000000021(WASHC3),ENSBTAG00000000022(NUP37),ENSBTAG00000000023(RNF2),ENSBTAG00000000024(DYM),ENSBTAG00000000025(RAB6A),ENSBTAG00000000026(VPS33B),ENSBTAG00000000030(RDM1),ENSBTAG00000000031(TRPV4),ENSBTAG00000…
CC	GO:0005634	nucleus	< 1e-30	1.835e-28	ENSBTAG00000000009(FOXF1),ENSBTAG00000000013(PRKAA1),ENSBTAG00000000014(TXN2),ENSBTAG00000000022(NUP37),ENSBTAG00000000023(RNF2),ENSBTAG00000000030(RDM1),ENSBTAG00000000037(CWC27),ENSBTAG00000000039(SIRT7),ENSBTAG00000000040(MAFG),ENSBTAG00000000053(FILIP1),ENSBTAG00000000054(SNAPC4),ENSBTAG00000000056(STRADA),ENSBTAG00000000064(FEN1),ENSBTAG00000000074(NFIA),ENSBTAG00000000080(GRWD1),ENSBTAG0000…
CC	GO:0005654	nucleoplasm	< 1e-30	1.835e-28	ENSBTAG00000000013(PRKAA1),ENSBTAG00000000022(NUP37),ENSBTAG00000000023(RNF2),ENSBTAG00000000037(CWC27),ENSBTAG00000000056(STRADA),ENSBTAG00000000064(FEN1),ENSBTAG00000000074(NFIA),ENSBTAG00000000081(COL4A3BP),ENSBTAG00000000092(HIF1AN),ENSBTAG00000000098(SETDB1),ENSBTAG00000000131(SENP3),ENSBTAG00000000141(NFU1),ENSBTAG00000000197(TRMT10A),ENSBTAG00000000252(POLE3),ENSBTAG00000000332(ERF),ENSBTA…
CC	GO:0005829	cytosol	< 1e-30	1.835e-28	ENSBTAG00000000010(UBL7),ENSBTAG00000000013(PRKAA1),ENSBTAG00000000025(RAB6A),ENSBTAG00000000030(RDM1),ENSBTAG00000000056(STRADA),ENSBTAG00000000077(ADSL),ENSBTAG00000000080(GRWD1),ENSBTAG00000000081(COL4A3BP),ENSBTAG00000000092(HIF1AN),ENSBTAG00000000098(SETDB1),ENSBTAG00000000141(NFU1),ENSBTAG00000000147(RIC8B),ENSBTAG00000000149(USP40),ENSBTAG00000000162(ANAPC16),ENSBTAG00000000163(DDIT4),ENSB…
CC	GO:0031982	vesicle	< 1e-30	1.835e-28	ENSBTAG00000000025(RAB6A),ENSBTAG00000000026(VPS33B),ENSBTAG00000000073(LRPAP1),ENSBTAG00000000090(SEC31B),ENSBTAG00000000095(CD274),ENSBTAG00000000113(ARHGEF2),ENSBTAG00000000224(TSPAN15),ENSBTAG00000000236(YWHAZ),ENSBTAG00000000260(ZNRF2),ENSBTAG00000000265(SYNPR),ENSBTAG00000000274(YKT6),ENSBTAG00000000279(RAB26),ENSBTAG00000000292(TCIRG1),ENSBTAG00000000320(UBAP1),ENSBTAG00000000344(SPACA3),E…
CC	GO:0031090	organelle membrane	< 1e-30	1.835e-28	ENSBTAG00000000025(RAB6A),ENSBTAG00000000026(VPS33B),ENSBTAG00000000078(GLIPR2),ENSBTAG00000000090(SEC31B),ENSBTAG00000000091(NDUFB8),ENSBTAG00000000095(CD274),ENSBTAG00000000099(CERS2),ENSBTAG00000000133(CD68),ENSBTAG00000000152(RANBP2),ENSBTAG00000000202(SLC25A19),ENSBTAG00000000203(ATP6V1G1),ENSBTAG00000000215(GNB1),ENSBTAG00000000224(TSPAN15),ENSBTAG00000000260(ZNRF2),ENSBTAG00000000274(YKT6)…
CC	GO:0097708	intracellular vesicle	< 1e-30	1.835e-28	ENSBTAG00000000025(RAB6A),ENSBTAG00000000026(VPS33B),ENSBTAG00000000073(LRPAP1),ENSBTAG00000000090(SEC31B),ENSBTAG00000000095(CD274),ENSBTAG00000000224(TSPAN15),ENSBTAG00000000236(YWHAZ),ENSBTAG00000000260(ZNRF2),ENSBTAG00000000265(SYNPR),ENSBTAG00000000274(YKT6),ENSBTAG00000000279(RAB26),ENSBTAG00000000292(TCIRG1),ENSBTAG00000000320(UBAP1),ENSBTAG00000000344(SPACA3),ENSBTAG00000000393(SSPN),ENSB…
CC	GO:0031410	cytoplasmic vesicle	< 1e-30	1.835e-28	ENSBTAG00000000025(RAB6A),ENSBTAG00000000026(VPS33B),ENSBTAG00000000073(LRPAP1),ENSBTAG00000000090(SEC31B),ENSBTAG00000000095(CD274),ENSBTAG00000000224(TSPAN15),ENSBTAG00000000236(YWHAZ),ENSBTAG00000000260(ZNRF2),ENSBTAG00000000265(SYNPR),ENSBTAG00000000274(YKT6),ENSBTAG00000000279(RAB26),ENSBTAG00000000292(TCIRG1),ENSBTAG00000000320(UBAP1),ENSBTAG00000000344(SPACA3),ENSBTAG00000000393(SSPN),ENSB…
CC	GO:0098588	bounding membrane of organelle	< 1e-30	1.835e-28	ENSBTAG00000000025(RAB6A),ENSBTAG00000000026(VPS33B),ENSBTAG00000000078(GLIPR2),ENSBTAG00000000090(SEC31B),ENSBTAG00000000095(CD274),ENSBTAG00000000133(CD68),ENSBTAG00000000203(ATP6V1G1),ENSBTAG00000000215(GNB1),ENSBTAG00000000224(TSPAN15),ENSBTAG00000000274(YKT6),ENSBTAG00000000279(RAB26),ENSBTAG00000000292(TCIRG1),ENSBTAG00000000320(UBAP1),ENSBTAG00000000344(SPACA3),ENSBTAG00000000354(PDE6G),EN…
CC	GO:0005794	Golgi apparatus	< 1e-30	1.835e-28	ENSBTAG00000000024(DYM),ENSBTAG00000000025(RAB6A),ENSBTAG00000000073(LRPAP1),ENSBTAG00000000078(GLIPR2),ENSBTAG00000000081(COL4A3BP),ENSBTAG00000000090(SEC31B),ENSBTAG00000000205(MMD),ENSBTAG00000000274(YKT6),ENSBTAG00000000279(RAB26),ENSBTAG00000000312(GRINA),ENSBTAG00000000320(UBAP1),ENSBTAG00000000342(PLOD3),ENSBTAG00000000379(GOLT1B),ENSBTAG00000000390(TPST1),ENSBTAG00000000414(FUT6),ENSBTAG0…
BP	GO:0006468	protein phosphorylation	2.6e-30	4.72641e-28	ENSBTAG00000000005(GRK3),ENSBTAG00000000013(PRKAA1),ENSBTAG00000000031(TRPV4),ENSBTAG00000000056(STRADA),ENSBTAG00000000078(GLIPR2),ENSBTAG00000000113(ARHGEF2),ENSBTAG00000000128(FGF18),ENSBTAG00000000163(DDIT4),ENSBTAG00000000184(EIF2AK3),ENSBTAG00000000205(MMD),ENSBTAG00000000218(MAP2K5),ENSBTAG00000000220(NEK10),ENSBTAG00000000231(BMPR1A),ENSBTAG00000000283(CSF1),ENSBTAG00000000306(ITK),ENSBTA…
CC	GO:0031984	organelle subcompartment	4.9e-30	8.82499e-28	ENSBTAG00000000019(SERINC1),ENSBTAG00000000025(RAB6A),ENSBTAG00000000067(SDF2L1),ENSBTAG00000000078(GLIPR2),ENSBTAG00000000085(CYP1A2),ENSBTAG00000000090(SEC31B),ENSBTAG00000000099(CERS2),ENSBTAG00000000140(EPHX1),ENSBTAG00000000274(YKT6),ENSBTAG00000000279(RAB26),ENSBTAG00000000342(PLOD3),ENSBTAG00000000379(GOLT1B),ENSBTAG00000000390(TPST1),ENSBTAG00000000405(VKORC1),ENSBTAG00000000414(FUT6),ENS…
BP	GO:0031399	regulation of protein modification process	7.6e-30	1.35622e-27	ENSBTAG00000000013(PRKAA1),ENSBTAG00000000031(TRPV4),ENSBTAG00000000056(STRADA),ENSBTAG00000000078(GLIPR2),ENSBTAG00000000113(ARHGEF2),ENSBTAG00000000128(FGF18),ENSBTAG00000000163(DDIT4),ENSBTAG00000000205(MMD),ENSBTAG00000000218(MAP2K5),ENSBTAG00000000231(BMPR1A),ENSBTAG00000000283(CSF1),ENSBTAG00000000317(MAPK8IP1),ENSBTAG00000000343(ZNHIT1),ENSBTAG00000000354(PDE6G),ENSBTAG00000000411(HGS),ENS…
BP	GO:0048513	animal organ development	1.2e-29	2.12193e-27	ENSBTAG00000000009(FOXF1),ENSBTAG00000000013(PRKAA1),ENSBTAG00000000016(LTA),ENSBTAG00000000026(VPS33B),ENSBTAG00000000031(TRPV4),ENSBTAG00000000033(PHOSPHO1),ENSBTAG00000000057(THBS3),ENSBTAG00000000074(NFIA),ENSBTAG00000000078(GLIPR2),ENSBTAG00000000081(COL4A3BP),ENSBTAG00000000085(CYP1A2),ENSBTAG00000000124(DHH),ENSBTAG00000000128(FGF18),ENSBTAG00000000163(DDIT4),ENSBTAG00000000164(GNRH1),ENSB…
BP	GO:0042886	amide transport	2.1e-29	3.67992e-27	ENSBTAG00000000013(PRKAA1),ENSBTAG00000000025(RAB6A),ENSBTAG00000000026(VPS33B),ENSBTAG00000000031(TRPV4),ENSBTAG00000000056(STRADA),ENSBTAG00000000081(COL4A3BP),ENSBTAG00000000090(SEC31B),ENSBTAG00000000095(CD274),ENSBTAG00000000152(RANBP2),ENSBTAG00000000231(BMPR1A),ENSBTAG00000000259(CHIA),ENSBTAG00000000264(RFX6),ENSBTAG00000000274(YKT6),ENSBTAG00000000279(RAB26),ENSBTAG00000000286(PFKM),ENSB…
BP	GO:0015833	peptide transport	3.2e-29	5.55743e-27	ENSBTAG00000000013(PRKAA1),ENSBTAG00000000025(RAB6A),ENSBTAG00000000026(VPS33B),ENSBTAG00000000031(TRPV4),ENSBTAG00000000056(STRADA),ENSBTAG00000000090(SEC31B),ENSBTAG00000000095(CD274),ENSBTAG00000000152(RANBP2),ENSBTAG00000000231(BMPR1A),ENSBTAG00000000259(CHIA),ENSBTAG00000000264(RFX6),ENSBTAG00000000274(YKT6),ENSBTAG00000000279(RAB26),ENSBTAG00000000286(PFKM),ENSBTAG00000000292(TCIRG1),ENSBTA…
BP	GO:0009653	anatomical structure morphogenesis	6.8e-29	1.1705e-26	ENSBTAG00000000009(FOXF1),ENSBTAG00000000023(RNF2),ENSBTAG00000000031(TRPV4),ENSBTAG00000000033(PHOSPHO1),ENSBTAG00000000056(STRADA),ENSBTAG00000000057(THBS3),ENSBTAG00000000076(RECK),ENSBTAG00000000081(COL4A3BP),ENSBTAG00000000088(ALCAM),ENSBTAG00000000113(ARHGEF2),ENSBTAG00000000128(FGF18),ENSBTAG00000000137(FRYL),ENSBTAG00000000182(SPINT2),ENSBTAG00000000184(EIF2AK3),ENSBTAG00000000225(POLB),E…
BP	GO:0048585	negative regulation of response to stimulus	8.7e-29	1.48442e-26	ENSBTAG00000000009(FOXF1),ENSBTAG00000000013(PRKAA1),ENSBTAG00000000042(PYCR1),ENSBTAG00000000092(HIF1AN),ENSBTAG00000000163(DDIT4),ENSBTAG00000000223(PPM1B),ENSBTAG00000000312(GRINA),ENSBTAG00000000317(MAPK8IP1),ENSBTAG00000000322(CD2AP),ENSBTAG00000000399(NANOS3),ENSBTAG00000000411(HGS),ENSBTAG00000000415(ERBIN),ENSBTAG00000000435(TARBP2),ENSBTAG00000000436(TNFAIP3),ENSBTAG00000000437(FFAR4),EN…
BP	GO:0015031	protein transport	9.7e-29	1.64065e-26	ENSBTAG00000000013(PRKAA1),ENSBTAG00000000025(RAB6A),ENSBTAG00000000026(VPS33B),ENSBTAG00000000031(TRPV4),ENSBTAG00000000056(STRADA),ENSBTAG00000000090(SEC31B),ENSBTAG00000000095(CD274),ENSBTAG00000000152(RANBP2),ENSBTAG00000000231(BMPR1A),ENSBTAG00000000259(CHIA),ENSBTAG00000000264(RFX6),ENSBTAG00000000274(YKT6),ENSBTAG00000000279(RAB26),ENSBTAG00000000286(PFKM),ENSBTAG00000000292(TCIRG1),ENSBTA…
BP	GO:0009891	positive regulation of biosynthetic process	1.3e-28	2.16122e-26	ENSBTAG00000000009(FOXF1),ENSBTAG00000000013(PRKAA1),ENSBTAG00000000039(SIRT7),ENSBTAG00000000040(MAFG),ENSBTAG00000000072(TFB2M),ENSBTAG00000000074(NFIA),ENSBTAG00000000113(ARHGEF2),ENSBTAG00000000184(EIF2AK3),ENSBTAG00000000222(ARID4B),ENSBTAG00000000231(BMPR1A),ENSBTAG00000000264(RFX6),ENSBTAG00000000285(GUF1),ENSBTAG00000000305(LMO4),ENSBTAG00000000347(RHOG),ENSBTAG00000000382(MED27),ENSBTAG0…
CC	GO:0043234	protein complex	1.3e-28	2.16122e-26	ENSBTAG00000000013(PRKAA1),ENSBTAG00000000021(WASHC3),ENSBTAG00000000022(NUP37),ENSBTAG00000000023(RNF2),ENSBTAG00000000026(VPS33B),ENSBTAG00000000039(SIRT7),ENSBTAG00000000054(SNAPC4),ENSBTAG00000000076(RECK),ENSBTAG00000000090(SEC31B),ENSBTAG00000000091(NDUFB8),ENSBTAG00000000113(ARHGEF2),ENSBTAG00000000152(RANBP2),ENSBTAG00000000162(ANAPC16),ENSBTAG00000000201(LTN1),ENSBTAG00000000203(ATP6V1G1…
BP	GO:0070727	cellular macromolecule localization	2.9e-28	4.78033e-26	ENSBTAG00000000013(PRKAA1),ENSBTAG00000000025(RAB6A),ENSBTAG00000000026(VPS33B),ENSBTAG00000000056(STRADA),ENSBTAG00000000090(SEC31B),ENSBTAG00000000152(RANBP2),ENSBTAG00000000224(TSPAN15),ENSBTAG00000000231(BMPR1A),ENSBTAG00000000257(MRAP2),ENSBTAG00000000279(RAB26),ENSBTAG00000000322(CD2AP),ENSBTAG00000000347(RHOG),ENSBTAG00000000411(HGS),ENSBTAG00000000415(ERBIN),ENSBTAG00000000436(TNFAIP3),EN…
CC	GO:0005783	endoplasmic reticulum	4e-28	6.53815e-26	ENSBTAG00000000019(SERINC1),ENSBTAG00000000067(SDF2L1),ENSBTAG00000000073(LRPAP1),ENSBTAG00000000081(COL4A3BP),ENSBTAG00000000085(CYP1A2),ENSBTAG00000000090(SEC31B),ENSBTAG00000000099(CERS2),ENSBTAG00000000140(EPHX1),ENSBTAG00000000241(STAU1),ENSBTAG00000000257(MRAP2),ENSBTAG00000000274(YKT6),ENSBTAG00000000312(GRINA),ENSBTAG00000000321(TBL2),ENSBTAG00000000342(PLOD3),ENSBTAG00000000379(GOLT1B),E…
MF	GO:0036094	small molecule binding	4.8e-28	7.7804e-26	ENSBTAG00000000005(GRK3),ENSBTAG00000000013(PRKAA1),ENSBTAG00000000025(RAB6A),ENSBTAG00000000039(SIRT7),ENSBTAG00000000056(STRADA),ENSBTAG00000000062(RASL12),ENSBTAG00000000071(PMP2),ENSBTAG00000000092(HIF1AN),ENSBTAG00000000105(RIT1),ENSBTAG00000000123(HAO2),ENSBTAG00000000132(EIF4A1),ENSBTAG00000000160(CBS),ENSBTAG00000000184(EIF2AK3),ENSBTAG00000000218(MAP2K5),ENSBTAG00000000220(NEK10),ENSBTAG…
BP	GO:0031328	positive regulation of cellular biosynthetic process	8.3e-28	1.33424e-25	ENSBTAG00000000009(FOXF1),ENSBTAG00000000013(PRKAA1),ENSBTAG00000000039(SIRT7),ENSBTAG00000000040(MAFG),ENSBTAG00000000072(TFB2M),ENSBTAG00000000074(NFIA),ENSBTAG00000000113(ARHGEF2),ENSBTAG00000000184(EIF2AK3),ENSBTAG00000000222(ARID4B),ENSBTAG00000000231(BMPR1A),ENSBTAG00000000264(RFX6),ENSBTAG00000000285(GUF1),ENSBTAG00000000305(LMO4),ENSBTAG00000000347(RHOG),ENSBTAG00000000382(MED27),ENSBTAG0…
BP	GO:0034613	cellular protein localization	8.9e-28	1.41897e-25	ENSBTAG00000000013(PRKAA1),ENSBTAG00000000025(RAB6A),ENSBTAG00000000026(VPS33B),ENSBTAG00000000056(STRADA),ENSBTAG00000000090(SEC31B),ENSBTAG00000000152(RANBP2),ENSBTAG00000000224(TSPAN15),ENSBTAG00000000231(BMPR1A),ENSBTAG00000000257(MRAP2),ENSBTAG00000000279(RAB26),ENSBTAG00000000322(CD2AP),ENSBTAG00000000347(RHOG),ENSBTAG00000000411(HGS),ENSBTAG00000000415(ERBIN),ENSBTAG00000000436(TNFAIP3),EN…
BP	GO:0012501	programmed cell death	1.1e-27	1.73952e-25	ENSBTAG00000000013(PRKAA1),ENSBTAG00000000095(CD274),ENSBTAG00000000163(DDIT4),ENSBTAG00000000184(EIF2AK3),ENSBTAG00000000225(POLB),ENSBTAG00000000292(TCIRG1),ENSBTAG00000000312(GRINA),ENSBTAG00000000317(MAPK8IP1),ENSBTAG00000000329(MEGF10),ENSBTAG00000000340(ADNP),ENSBTAG00000000395(ADAMTS20),ENSBTAG00000000396(PIM1),ENSBTAG00000000399(NANOS3),ENSBTAG00000000418(TOX3),ENSBTAG00000000428(BAK1),EN…
BP	GO:0050790	regulation of catalytic activity	1.3e-27	2.03922e-25	ENSBTAG00000000056(STRADA),ENSBTAG00000000076(RECK),ENSBTAG00000000128(FGF18),ENSBTAG00000000147(RIC8B),ENSBTAG00000000152(RANBP2),ENSBTAG00000000182(SPINT2),ENSBTAG00000000199(PDP1),ENSBTAG00000000205(MMD),ENSBTAG00000000210(ARHGAP31),ENSBTAG00000000218(MAP2K5),ENSBTAG00000000283(CSF1),ENSBTAG00000000305(LMO4),ENSBTAG00000000306(ITK),ENSBTAG00000000333(ARHGAP20),ENSBTAG00000000347(RHOG),ENSBTAG0…
BP	GO:0006915	apoptotic process	2e-27	3.11216e-25	ENSBTAG00000000013(PRKAA1),ENSBTAG00000000095(CD274),ENSBTAG00000000163(DDIT4),ENSBTAG00000000184(EIF2AK3),ENSBTAG00000000225(POLB),ENSBTAG00000000292(TCIRG1),ENSBTAG00000000312(GRINA),ENSBTAG00000000317(MAPK8IP1),ENSBTAG00000000329(MEGF10),ENSBTAG00000000340(ADNP),ENSBTAG00000000395(ADAMTS20),ENSBTAG00000000396(PIM1),ENSBTAG00000000399(NANOS3),ENSBTAG00000000418(TOX3),ENSBTAG00000000428(BAK1),EN…
BP	GO:0008283	cell proliferation	4.2e-27	6.48367e-25	ENSBTAG00000000009(FOXF1),ENSBTAG00000000040(MAFG),ENSBTAG00000000081(COL4A3BP),ENSBTAG00000000095(CD274),ENSBTAG00000000113(ARHGEF2),ENSBTAG00000000128(FGF18),ENSBTAG00000000163(DDIT4),ENSBTAG00000000215(GNB1),ENSBTAG00000000231(BMPR1A),ENSBTAG00000000283(CSF1),ENSBTAG00000000292(TCIRG1),ENSBTAG00000000296(IMPDH1),ENSBTAG00000000317(MAPK8IP1),ENSBTAG00000000329(MEGF10),ENSBTAG00000000372(TIPIN),…
BP	GO:0016192	vesicle-mediated transport	4.6e-27	7.04524e-25	ENSBTAG00000000005(GRK3),ENSBTAG00000000009(FOXF1),ENSBTAG00000000021(WASHC3),ENSBTAG00000000025(RAB6A),ENSBTAG00000000026(VPS33B),ENSBTAG00000000073(LRPAP1),ENSBTAG00000000090(SEC31B),ENSBTAG00000000274(YKT6),ENSBTAG00000000279(RAB26),ENSBTAG00000000317(MAPK8IP1),ENSBTAG00000000329(MEGF10),ENSBTAG00000000379(GOLT1B),ENSBTAG00000000411(HGS),ENSBTAG00000000460(SYTL2),ENSBTAG00000000511(CNST),ENSBT…
BP	GO:0044093	positive regulation of molecular function	8.9e-27	1.35245e-24	ENSBTAG00000000056(STRADA),ENSBTAG00000000113(ARHGEF2),ENSBTAG00000000128(FGF18),ENSBTAG00000000147(RIC8B),ENSBTAG00000000152(RANBP2),ENSBTAG00000000199(PDP1),ENSBTAG00000000205(MMD),ENSBTAG00000000210(ARHGAP31),ENSBTAG00000000218(MAP2K5),ENSBTAG00000000283(CSF1),ENSBTAG00000000305(LMO4),ENSBTAG00000000306(ITK),ENSBTAG00000000333(ARHGAP20),ENSBTAG00000000347(RHOG),ENSBTAG00000000354(PDE6G),ENSBTA…
BP	GO:0007166	cell surface receptor signaling pathway	1.2e-26	1.79548e-24	ENSBTAG00000000009(FOXF1),ENSBTAG00000000076(RECK),ENSBTAG00000000092(HIF1AN),ENSBTAG00000000095(CD274),ENSBTAG00000000102(GPR75),ENSBTAG00000000124(DHH),ENSBTAG00000000128(FGF18),ENSBTAG00000000163(DDIT4),ENSBTAG00000000224(TSPAN15),ENSBTAG00000000231(BMPR1A),ENSBTAG00000000273(IL5RA),ENSBTAG00000000283(CSF1),ENSBTAG00000000306(ITK),ENSBTAG00000000354(PDE6G),ENSBTAG00000000357(PRAG1),ENSBTAG0000…
BP	GO:0051174	regulation of phosphorus metabolic process	1.2e-26	1.79548e-24	ENSBTAG00000000013(PRKAA1),ENSBTAG00000000031(TRPV4),ENSBTAG00000000056(STRADA),ENSBTAG00000000078(GLIPR2),ENSBTAG00000000113(ARHGEF2),ENSBTAG00000000128(FGF18),ENSBTAG00000000152(RANBP2),ENSBTAG00000000163(DDIT4),ENSBTAG00000000205(MMD),ENSBTAG00000000218(MAP2K5),ENSBTAG00000000231(BMPR1A),ENSBTAG00000000283(CSF1),ENSBTAG00000000305(LMO4),ENSBTAG00000000317(MAPK8IP1),ENSBTAG00000000354(PDE6G),EN…
BP	GO:0010628	positive regulation of gene expression	1.4e-26	2.07873e-24	ENSBTAG00000000009(FOXF1),ENSBTAG00000000013(PRKAA1),ENSBTAG00000000031(TRPV4),ENSBTAG00000000039(SIRT7),ENSBTAG00000000040(MAFG),ENSBTAG00000000072(TFB2M),ENSBTAG00000000074(NFIA),ENSBTAG00000000113(ARHGEF2),ENSBTAG00000000184(EIF2AK3),ENSBTAG00000000222(ARID4B),ENSBTAG00000000231(BMPR1A),ENSBTAG00000000264(RFX6),ENSBTAG00000000283(CSF1),ENSBTAG00000000285(GUF1),ENSBTAG00000000305(LMO4),ENSBTAG0…
BP	GO:0019220	regulation of phosphate metabolic process	2.6e-26	3.83126e-24	ENSBTAG00000000013(PRKAA1),ENSBTAG00000000031(TRPV4),ENSBTAG00000000056(STRADA),ENSBTAG00000000078(GLIPR2),ENSBTAG00000000113(ARHGEF2),ENSBTAG00000000128(FGF18),ENSBTAG00000000152(RANBP2),ENSBTAG00000000163(DDIT4),ENSBTAG00000000205(MMD),ENSBTAG00000000218(MAP2K5),ENSBTAG00000000231(BMPR1A),ENSBTAG00000000283(CSF1),ENSBTAG00000000305(LMO4),ENSBTAG00000000317(MAPK8IP1),ENSBTAG00000000354(PDE6G),EN…
BP	GO:0048584	positive regulation of response to stimulus	4.6e-26	6.72741e-24	ENSBTAG00000000016(LTA),ENSBTAG00000000031(TRPV4),ENSBTAG00000000076(RECK),ENSBTAG00000000078(GLIPR2),ENSBTAG00000000095(CD274),ENSBTAG00000000128(FGF18),ENSBTAG00000000130(TNFSF13),ENSBTAG00000000218(MAP2K5),ENSBTAG00000000231(BMPR1A),ENSBTAG00000000264(RFX6),ENSBTAG00000000283(CSF1),ENSBTAG00000000306(ITK),ENSBTAG00000000317(MAPK8IP1),ENSBTAG00000000354(PDE6G),ENSBTAG00000000369(EPS8),ENSBTAG00…
CC	GO:0098805	whole membrane	5e-26	7.25784e-24	ENSBTAG00000000026(VPS33B),ENSBTAG00000000090(SEC31B),ENSBTAG00000000095(CD274),ENSBTAG00000000133(CD68),ENSBTAG00000000152(RANBP2),ENSBTAG00000000203(ATP6V1G1),ENSBTAG00000000224(TSPAN15),ENSBTAG00000000231(BMPR1A),ENSBTAG00000000279(RAB26),ENSBTAG00000000292(TCIRG1),ENSBTAG00000000320(UBAP1),ENSBTAG00000000344(SPACA3),ENSBTAG00000000411(HGS),ENSBTAG00000000428(BAK1),ENSBTAG00000000469(PPP2CA),E…
BP	GO:0043085	positive regulation of catalytic activity	1.2e-25	1.72898e-23	ENSBTAG00000000056(STRADA),ENSBTAG00000000128(FGF18),ENSBTAG00000000147(RIC8B),ENSBTAG00000000152(RANBP2),ENSBTAG00000000199(PDP1),ENSBTAG00000000205(MMD),ENSBTAG00000000210(ARHGAP31),ENSBTAG00000000218(MAP2K5),ENSBTAG00000000283(CSF1),ENSBTAG00000000305(LMO4),ENSBTAG00000000306(ITK),ENSBTAG00000000333(ARHGAP20),ENSBTAG00000000347(RHOG),ENSBTAG00000000354(PDE6G),ENSBTAG00000000428(BAK1),ENSBTAG00…
BP	GO:0045935	positive regulation of nucleobase-containing compound metabolic process	4.5e-25	6.43599e-23	ENSBTAG00000000009(FOXF1),ENSBTAG00000000013(PRKAA1),ENSBTAG00000000039(SIRT7),ENSBTAG00000000040(MAFG),ENSBTAG00000000072(TFB2M),ENSBTAG00000000074(NFIA),ENSBTAG00000000098(SETDB1),ENSBTAG00000000113(ARHGEF2),ENSBTAG00000000130(TNFSF13),ENSBTAG00000000184(EIF2AK3),ENSBTAG00000000222(ARID4B),ENSBTAG00000000231(BMPR1A),ENSBTAG00000000264(RFX6),ENSBTAG00000000305(LMO4),ENSBTAG00000000347(RHOG),ENSB…
BP	GO:0010557	positive regulation of macromolecule biosynthetic process	7.3e-25	1.03644e-22	ENSBTAG00000000009(FOXF1),ENSBTAG00000000013(PRKAA1),ENSBTAG00000000039(SIRT7),ENSBTAG00000000040(MAFG),ENSBTAG00000000072(TFB2M),ENSBTAG00000000074(NFIA),ENSBTAG00000000113(ARHGEF2),ENSBTAG00000000184(EIF2AK3),ENSBTAG00000000222(ARID4B),ENSBTAG00000000231(BMPR1A),ENSBTAG00000000264(RFX6),ENSBTAG00000000285(GUF1),ENSBTAG00000000305(LMO4),ENSBTAG00000000347(RHOG),ENSBTAG00000000382(MED27),ENSBTAG0…
BP	GO:1902531	regulation of intracellular signal transduction	8.7e-25	1.22626e-22	ENSBTAG00000000013(PRKAA1),ENSBTAG00000000031(TRPV4),ENSBTAG00000000078(GLIPR2),ENSBTAG00000000113(ARHGEF2),ENSBTAG00000000128(FGF18),ENSBTAG00000000146(FARP1),ENSBTAG00000000163(DDIT4),ENSBTAG00000000184(EIF2AK3),ENSBTAG00000000218(MAP2K5),ENSBTAG00000000223(PPM1B),ENSBTAG00000000240(AKAP7),ENSBTAG00000000283(CSF1),ENSBTAG00000000312(GRINA),ENSBTAG00000000317(MAPK8IP1),ENSBTAG00000000322(CD2AP),…
MF	GO:0019900	kinase binding	1.3e-24	1.81916e-22	ENSBTAG00000000031(TRPV4),ENSBTAG00000000056(STRADA),ENSBTAG00000000240(AKAP7),ENSBTAG00000000259(CHIA),ENSBTAG00000000317(MAPK8IP1),ENSBTAG00000000321(TBL2),ENSBTAG00000000347(RHOG),ENSBTAG00000000436(TNFAIP3),ENSBTAG00000000484(HYAL2),ENSBTAG00000000546(TOB1),ENSBTAG00000000599(CCNI),ENSBTAG00000000613(ELAVL1),ENSBTAG00000000660(FAM83D),ENSBTAG00000000696(ILK),ENSBTAG00000000746(KAT2B),ENSBTAG0…
BP	GO:0042325	regulation of phosphorylation	1.9e-24	2.63978e-22	ENSBTAG00000000013(PRKAA1),ENSBTAG00000000031(TRPV4),ENSBTAG00000000056(STRADA),ENSBTAG00000000078(GLIPR2),ENSBTAG00000000113(ARHGEF2),ENSBTAG00000000128(FGF18),ENSBTAG00000000152(RANBP2),ENSBTAG00000000163(DDIT4),ENSBTAG00000000205(MMD),ENSBTAG00000000218(MAP2K5),ENSBTAG00000000231(BMPR1A),ENSBTAG00000000283(CSF1),ENSBTAG00000000305(LMO4),ENSBTAG00000000317(MAPK8IP1),ENSBTAG00000000354(PDE6G),EN…
BP	GO:0009968	negative regulation of signal transduction	2.1e-24	2.89696e-22	ENSBTAG00000000013(PRKAA1),ENSBTAG00000000092(HIF1AN),ENSBTAG00000000163(DDIT4),ENSBTAG00000000223(PPM1B),ENSBTAG00000000312(GRINA),ENSBTAG00000000317(MAPK8IP1),ENSBTAG00000000322(CD2AP),ENSBTAG00000000399(NANOS3),ENSBTAG00000000411(HGS),ENSBTAG00000000415(ERBIN),ENSBTAG00000000436(TNFAIP3),ENSBTAG00000000484(HYAL2),ENSBTAG00000000494(PDE4D),ENSBTAG00000000541(NKX2-1),ENSBTAG00000000546(TOB1),ENS…
BP	GO:0010941	regulation of cell death	2.2e-24	3.01354e-22	ENSBTAG00000000013(PRKAA1),ENSBTAG00000000042(PYCR1),ENSBTAG00000000073(LRPAP1),ENSBTAG00000000095(CD274),ENSBTAG00000000102(GPR75),ENSBTAG00000000163(DDIT4),ENSBTAG00000000184(EIF2AK3),ENSBTAG00000000243(HEBP2),ENSBTAG00000000283(CSF1),ENSBTAG00000000312(GRINA),ENSBTAG00000000317(MAPK8IP1),ENSBTAG00000000340(ADNP),ENSBTAG00000000395(ADAMTS20),ENSBTAG00000000396(PIM1),ENSBTAG00000000399(NANOS3),E…
MF	GO:0019901	protein kinase binding	7.7e-24	1.04736e-21	ENSBTAG00000000031(TRPV4),ENSBTAG00000000240(AKAP7),ENSBTAG00000000317(MAPK8IP1),ENSBTAG00000000321(TBL2),ENSBTAG00000000347(RHOG),ENSBTAG00000000484(HYAL2),ENSBTAG00000000546(TOB1),ENSBTAG00000000599(CCNI),ENSBTAG00000000613(ELAVL1),ENSBTAG00000000660(FAM83D),ENSBTAG00000000696(ILK),ENSBTAG00000000746(KAT2B),ENSBTAG00000000778(HSP90AB1),ENSBTAG00000000837(PARP1),ENSBTAG00000000878(RB1CC1),ENSBTA…
BP	GO:2000026	regulation of multicellular organismal development	9e-24	1.21569e-21	ENSBTAG00000000013(PRKAA1),ENSBTAG00000000040(MAFG),ENSBTAG00000000076(RECK),ENSBTAG00000000078(GLIPR2),ENSBTAG00000000095(CD274),ENSBTAG00000000113(ARHGEF2),ENSBTAG00000000128(FGF18),ENSBTAG00000000130(TNFSF13),ENSBTAG00000000164(GNRH1),ENSBTAG00000000205(MMD),ENSBTAG00000000231(BMPR1A),ENSBTAG00000000253(PTPRF),ENSBTAG00000000283(CSF1),ENSBTAG00000000329(MEGF10),ENSBTAG00000000396(PIM1),ENSBTAG…
BP	GO:0002376	immune system process	1.1e-23	1.47559e-21	ENSBTAG00000000009(FOXF1),ENSBTAG00000000016(LTA),ENSBTAG00000000025(RAB6A),ENSBTAG00000000026(VPS33B),ENSBTAG00000000031(TRPV4),ENSBTAG00000000095(CD274),ENSBTAG00000000130(TNFSF13),ENSBTAG00000000163(DDIT4),ENSBTAG00000000223(PPM1B),ENSBTAG00000000225(POLB),ENSBTAG00000000231(BMPR1A),ENSBTAG00000000273(IL5RA),ENSBTAG00000000283(CSF1),ENSBTAG00000000291(DHTKD1),ENSBTAG00000000292(TCIRG1),ENSBTAG…
BP	GO:0023056	positive regulation of signaling	1.2e-23	1.59871e-21	ENSBTAG00000000031(TRPV4),ENSBTAG00000000076(RECK),ENSBTAG00000000078(GLIPR2),ENSBTAG00000000128(FGF18),ENSBTAG00000000218(MAP2K5),ENSBTAG00000000231(BMPR1A),ENSBTAG00000000264(RFX6),ENSBTAG00000000283(CSF1),ENSBTAG00000000286(PFKM),ENSBTAG00000000317(MAPK8IP1),ENSBTAG00000000354(PDE6G),ENSBTAG00000000369(EPS8),ENSBTAG00000000395(ADAMTS20),ENSBTAG00000000428(BAK1),ENSBTAG00000000436(TNFAIP3),ENSB…
BP	GO:0044085	cellular component biogenesis	1.3e-23	1.72016e-21	ENSBTAG00000000021(WASHC3),ENSBTAG00000000031(TRPV4),ENSBTAG00000000072(TFB2M),ENSBTAG00000000077(ADSL),ENSBTAG00000000080(GRWD1),ENSBTAG00000000090(SEC31B),ENSBTAG00000000091(NDUFB8),ENSBTAG00000000094(ATPAF1),ENSBTAG00000000113(ARHGEF2),ENSBTAG00000000141(NFU1),ENSBTAG00000000184(EIF2AK3),ENSBTAG00000000251(ALAD),ENSBTAG00000000252(POLE3),ENSBTAG00000000271(MNS1),ENSBTAG00000000305(LMO4),ENSBTA…
BP	GO:0007049	cell cycle	1.6e-23	2.10281e-21	ENSBTAG00000000023(RNF2),ENSBTAG00000000039(SIRT7),ENSBTAG00000000056(STRADA),ENSBTAG00000000064(FEN1),ENSBTAG00000000113(ARHGEF2),ENSBTAG00000000162(ANAPC16),ENSBTAG00000000169(ASZ1),ENSBTAG00000000281(MND1),ENSBTAG00000000369(EPS8),ENSBTAG00000000372(TIPIN),ENSBTAG00000000396(PIM1),ENSBTAG00000000399(NANOS3),ENSBTAG00000000428(BAK1),ENSBTAG00000000436(TNFAIP3),ENSBTAG00000000469(PPP2CA),ENSBTAG…
BP	GO:0010647	positive regulation of cell communication	2e-23	2.61087e-21	ENSBTAG00000000031(TRPV4),ENSBTAG00000000076(RECK),ENSBTAG00000000078(GLIPR2),ENSBTAG00000000128(FGF18),ENSBTAG00000000218(MAP2K5),ENSBTAG00000000231(BMPR1A),ENSBTAG00000000264(RFX6),ENSBTAG00000000283(CSF1),ENSBTAG00000000286(PFKM),ENSBTAG00000000317(MAPK8IP1),ENSBTAG00000000354(PDE6G),ENSBTAG00000000369(EPS8),ENSBTAG00000000395(ADAMTS20),ENSBTAG00000000428(BAK1),ENSBTAG00000000436(TNFAIP3),ENSB…
BP	GO:0023057	negative regulation of signaling	2.8e-23	3.63085e-21	ENSBTAG00000000013(PRKAA1),ENSBTAG00000000092(HIF1AN),ENSBTAG00000000163(DDIT4),ENSBTAG00000000223(PPM1B),ENSBTAG00000000312(GRINA),ENSBTAG00000000317(MAPK8IP1),ENSBTAG00000000322(CD2AP),ENSBTAG00000000399(NANOS3),ENSBTAG00000000411(HGS),ENSBTAG00000000415(ERBIN),ENSBTAG00000000436(TNFAIP3),ENSBTAG00000000484(HYAL2),ENSBTAG00000000494(PDE4D),ENSBTAG00000000541(NKX2-1),ENSBTAG00000000546(TOB1),ENS…
BP	GO:0010648	negative regulation of cell communication	5.4e-23	6.95599e-21	ENSBTAG00000000013(PRKAA1),ENSBTAG00000000092(HIF1AN),ENSBTAG00000000163(DDIT4),ENSBTAG00000000223(PPM1B),ENSBTAG00000000312(GRINA),ENSBTAG00000000317(MAPK8IP1),ENSBTAG00000000322(CD2AP),ENSBTAG00000000399(NANOS3),ENSBTAG00000000411(HGS),ENSBTAG00000000415(ERBIN),ENSBTAG00000000436(TNFAIP3),ENSBTAG00000000484(HYAL2),ENSBTAG00000000494(PDE4D),ENSBTAG00000000541(NKX2-1),ENSBTAG00000000546(TOB1),ENS…
MF	GO:0046872	metal ion binding	5.8e-23	7.42209e-21	ENSBTAG00000000023(RNF2),ENSBTAG00000000039(SIRT7),ENSBTAG00000000057(THBS3),ENSBTAG00000000061(PCDH7),ENSBTAG00000000064(FEN1),ENSBTAG00000000085(CYP1A2),ENSBTAG00000000092(HIF1AN),ENSBTAG00000000097(EFCAB14),ENSBTAG00000000098(SETDB1),ENSBTAG00000000111(UGP2),ENSBTAG00000000113(ARHGEF2),ENSBTAG00000000124(DHH),ENSBTAG00000000141(NFU1),ENSBTAG00000000152(RANBP2),ENSBTAG00000000199(PDP1),ENSBTAG0…
BP	GO:0001932	regulation of protein phosphorylation	8.7e-23	1.10604e-20	ENSBTAG00000000013(PRKAA1),ENSBTAG00000000031(TRPV4),ENSBTAG00000000056(STRADA),ENSBTAG00000000078(GLIPR2),ENSBTAG00000000113(ARHGEF2),ENSBTAG00000000128(FGF18),ENSBTAG00000000163(DDIT4),ENSBTAG00000000205(MMD),ENSBTAG00000000218(MAP2K5),ENSBTAG00000000231(BMPR1A),ENSBTAG00000000283(CSF1),ENSBTAG00000000317(MAPK8IP1),ENSBTAG00000000354(PDE6G),ENSBTAG00000000411(HGS),ENSBTAG00000000428(BAK1),ENSBT…
BP	GO:0051247	positive regulation of protein metabolic process	1e-22	1.26305e-20	ENSBTAG00000000013(PRKAA1),ENSBTAG00000000031(TRPV4),ENSBTAG00000000056(STRADA),ENSBTAG00000000078(GLIPR2),ENSBTAG00000000113(ARHGEF2),ENSBTAG00000000128(FGF18),ENSBTAG00000000205(MMD),ENSBTAG00000000218(MAP2K5),ENSBTAG00000000231(BMPR1A),ENSBTAG00000000283(CSF1),ENSBTAG00000000285(GUF1),ENSBTAG00000000317(MAPK8IP1),ENSBTAG00000000354(PDE6G),ENSBTAG00000000428(BAK1),ENSBTAG00000000435(TARBP2),ENS…
BP	GO:0009888	tissue development	1.3e-22	1.63137e-20	ENSBTAG00000000009(FOXF1),ENSBTAG00000000013(PRKAA1),ENSBTAG00000000031(TRPV4),ENSBTAG00000000033(PHOSPHO1),ENSBTAG00000000040(MAFG),ENSBTAG00000000057(THBS3),ENSBTAG00000000078(GLIPR2),ENSBTAG00000000128(FGF18),ENSBTAG00000000182(SPINT2),ENSBTAG00000000222(ARID4B),ENSBTAG00000000231(BMPR1A),ENSBTAG00000000264(RFX6),ENSBTAG00000000266(NAB1),ENSBTAG00000000283(CSF1),ENSBTAG00000000292(TCIRG1),ENSB…
MF	GO:0097367	carbohydrate derivative binding	1.5e-22	1.87029e-20	ENSBTAG00000000005(GRK3),ENSBTAG00000000013(PRKAA1),ENSBTAG00000000025(RAB6A),ENSBTAG00000000056(STRADA),ENSBTAG00000000057(THBS3),ENSBTAG00000000062(RASL12),ENSBTAG00000000073(LRPAP1),ENSBTAG00000000087(HSD17B12),ENSBTAG00000000105(RIT1),ENSBTAG00000000123(HAO2),ENSBTAG00000000132(EIF4A1),ENSBTAG00000000184(EIF2AK3),ENSBTAG00000000218(MAP2K5),ENSBTAG00000000220(NEK10),ENSBTAG00000000231(BMPR1A),…
BP	GO:0044281	small molecule metabolic process	2e-22	2.47783e-20	ENSBTAG00000000011(TDH),ENSBTAG00000000013(PRKAA1),ENSBTAG00000000014(TXN2),ENSBTAG00000000042(PYCR1),ENSBTAG00000000077(ADSL),ENSBTAG00000000085(CYP1A2),ENSBTAG00000000091(NDUFB8),ENSBTAG00000000123(HAO2),ENSBTAG00000000140(EPHX1),ENSBTAG00000000152(RANBP2),ENSBTAG00000000160(CBS),ENSBTAG00000000163(DDIT4),ENSBTAG00000000188(HS3ST5),ENSBTAG00000000212(NADK),ENSBTAG00000000246(ME3),ENSBTAG0000000…
MF	GO:0043169	cation binding	2.1e-22	2.58526e-20	ENSBTAG00000000023(RNF2),ENSBTAG00000000039(SIRT7),ENSBTAG00000000057(THBS3),ENSBTAG00000000061(PCDH7),ENSBTAG00000000064(FEN1),ENSBTAG00000000085(CYP1A2),ENSBTAG00000000092(HIF1AN),ENSBTAG00000000097(EFCAB14),ENSBTAG00000000098(SETDB1),ENSBTAG00000000111(UGP2),ENSBTAG00000000113(ARHGEF2),ENSBTAG00000000124(DHH),ENSBTAG00000000141(NFU1),ENSBTAG00000000152(RANBP2),ENSBTAG00000000199(PDP1),ENSBTAG0…
BP	GO:0009892	negative regulation of metabolic process	3.6e-22	4.404e-20	ENSBTAG00000000009(FOXF1),ENSBTAG00000000013(PRKAA1),ENSBTAG00000000023(RNF2),ENSBTAG00000000031(TRPV4),ENSBTAG00000000039(SIRT7),ENSBTAG00000000073(LRPAP1),ENSBTAG00000000074(NFIA),ENSBTAG00000000076(RECK),ENSBTAG00000000092(HIF1AN),ENSBTAG00000000098(SETDB1),ENSBTAG00000000163(DDIT4),ENSBTAG00000000169(ASZ1),ENSBTAG00000000182(SPINT2),ENSBTAG00000000251(ALAD),ENSBTAG00000000252(POLE3),ENSBTAG00…
BP	GO:0051254	positive regulation of RNA metabolic process	4e-22	4.86275e-20	ENSBTAG00000000009(FOXF1),ENSBTAG00000000013(PRKAA1),ENSBTAG00000000039(SIRT7),ENSBTAG00000000040(MAFG),ENSBTAG00000000072(TFB2M),ENSBTAG00000000074(NFIA),ENSBTAG00000000113(ARHGEF2),ENSBTAG00000000184(EIF2AK3),ENSBTAG00000000222(ARID4B),ENSBTAG00000000231(BMPR1A),ENSBTAG00000000264(RFX6),ENSBTAG00000000305(LMO4),ENSBTAG00000000347(RHOG),ENSBTAG00000000382(MED27),ENSBTAG00000000385(ZBTB18),ENSBTA…
MF	GO:0140096	catalytic activity, acting on a protein	4.4e-22	5.3158e-20	ENSBTAG00000000005(GRK3),ENSBTAG00000000013(PRKAA1),ENSBTAG00000000023(RNF2),ENSBTAG00000000037(CWC27),ENSBTAG00000000039(SIRT7),ENSBTAG00000000056(STRADA),ENSBTAG00000000092(HIF1AN),ENSBTAG00000000098(SETDB1),ENSBTAG00000000120(USP43),ENSBTAG00000000124(DHH),ENSBTAG00000000131(SENP3),ENSBTAG00000000149(USP40),ENSBTAG00000000152(RANBP2),ENSBTAG00000000184(EIF2AK3),ENSBTAG00000000199(PDP1),ENSBTAG…
BP	GO:0009967	positive regulation of signal transduction	5.2e-22	6.24353e-20	ENSBTAG00000000031(TRPV4),ENSBTAG00000000076(RECK),ENSBTAG00000000078(GLIPR2),ENSBTAG00000000128(FGF18),ENSBTAG00000000218(MAP2K5),ENSBTAG00000000231(BMPR1A),ENSBTAG00000000283(CSF1),ENSBTAG00000000317(MAPK8IP1),ENSBTAG00000000354(PDE6G),ENSBTAG00000000369(EPS8),ENSBTAG00000000395(ADAMTS20),ENSBTAG00000000428(BAK1),ENSBTAG00000000436(TNFAIP3),ENSBTAG00000000437(FFAR4),ENSBTAG00000000476(THPO),ENS…
BP	GO:0042127	regulation of cell proliferation	6.1e-22	7.27921e-20	ENSBTAG00000000009(FOXF1),ENSBTAG00000000040(MAFG),ENSBTAG00000000095(CD274),ENSBTAG00000000128(FGF18),ENSBTAG00000000231(BMPR1A),ENSBTAG00000000283(CSF1),ENSBTAG00000000317(MAPK8IP1),ENSBTAG00000000372(TIPIN),ENSBTAG00000000396(PIM1),ENSBTAG00000000436(TNFAIP3),ENSBTAG00000000476(THPO),ENSBTAG00000000483(HYAL1),ENSBTAG00000000507(NR4A1),ENSBTAG00000000546(TOB1),ENSBTAG00000000563(MYD88),ENSBTAG0…
BP	GO:0022607	cellular component assembly	1.3e-21	1.54185e-19	ENSBTAG00000000021(WASHC3),ENSBTAG00000000031(TRPV4),ENSBTAG00000000077(ADSL),ENSBTAG00000000080(GRWD1),ENSBTAG00000000090(SEC31B),ENSBTAG00000000091(NDUFB8),ENSBTAG00000000094(ATPAF1),ENSBTAG00000000113(ARHGEF2),ENSBTAG00000000141(NFU1),ENSBTAG00000000184(EIF2AK3),ENSBTAG00000000251(ALAD),ENSBTAG00000000252(POLE3),ENSBTAG00000000271(MNS1),ENSBTAG00000000305(LMO4),ENSBTAG00000000342(PLOD3),ENSBTA…
BP	GO:0040011	locomotion	1.5e-21	1.76827e-19	ENSBTAG00000000009(FOXF1),ENSBTAG00000000031(TRPV4),ENSBTAG00000000032(ABI3),ENSBTAG00000000076(RECK),ENSBTAG00000000078(GLIPR2),ENSBTAG00000000088(ALCAM),ENSBTAG00000000113(ARHGEF2),ENSBTAG00000000128(FGF18),ENSBTAG00000000163(DDIT4),ENSBTAG00000000164(GNRH1),ENSBTAG00000000182(SPINT2),ENSBTAG00000000231(BMPR1A),ENSBTAG00000000253(PTPRF),ENSBTAG00000000283(CSF1),ENSBTAG00000000305(LMO4),ENSBTAG0…
BP	GO:0016477	cell migration	3e-21	3.51524e-19	ENSBTAG00000000009(FOXF1),ENSBTAG00000000031(TRPV4),ENSBTAG00000000032(ABI3),ENSBTAG00000000076(RECK),ENSBTAG00000000078(GLIPR2),ENSBTAG00000000113(ARHGEF2),ENSBTAG00000000128(FGF18),ENSBTAG00000000163(DDIT4),ENSBTAG00000000164(GNRH1),ENSBTAG00000000231(BMPR1A),ENSBTAG00000000253(PTPRF),ENSBTAG00000000283(CSF1),ENSBTAG00000000305(LMO4),ENSBTAG00000000329(MEGF10),ENSBTAG00000000347(RHOG),ENSBTAG00…
MF	GO:0000166	nucleotide binding	3.4e-21	3.93651e-19	ENSBTAG00000000005(GRK3),ENSBTAG00000000013(PRKAA1),ENSBTAG00000000025(RAB6A),ENSBTAG00000000039(SIRT7),ENSBTAG00000000056(STRADA),ENSBTAG00000000062(RASL12),ENSBTAG00000000105(RIT1),ENSBTAG00000000123(HAO2),ENSBTAG00000000132(EIF4A1),ENSBTAG00000000184(EIF2AK3),ENSBTAG00000000218(MAP2K5),ENSBTAG00000000220(NEK10),ENSBTAG00000000231(BMPR1A),ENSBTAG00000000246(ME3),ENSBTAG00000000279(RAB26),ENSBTA…
MF	GO:1901265	nucleoside phosphate binding	3.4e-21	3.93651e-19	ENSBTAG00000000005(GRK3),ENSBTAG00000000013(PRKAA1),ENSBTAG00000000025(RAB6A),ENSBTAG00000000039(SIRT7),ENSBTAG00000000056(STRADA),ENSBTAG00000000062(RASL12),ENSBTAG00000000105(RIT1),ENSBTAG00000000123(HAO2),ENSBTAG00000000132(EIF4A1),ENSBTAG00000000184(EIF2AK3),ENSBTAG00000000218(MAP2K5),ENSBTAG00000000220(NEK10),ENSBTAG00000000231(BMPR1A),ENSBTAG00000000246(ME3),ENSBTAG00000000279(RAB26),ENSBTA…
BP	GO:0006629	lipid metabolic process	3.8e-21	4.3736e-19	ENSBTAG00000000013(PRKAA1),ENSBTAG00000000019(SERINC1),ENSBTAG00000000065(CRLS1),ENSBTAG00000000081(COL4A3BP),ENSBTAG00000000085(CYP1A2),ENSBTAG00000000099(CERS2),ENSBTAG00000000123(HAO2),ENSBTAG00000000124(DHH),ENSBTAG00000000301,ENSBTAG00000000442(RBP4),ENSBTAG00000000541(NKX2-1),ENSBTAG00000000559(PLTP),ENSBTAG00000000578(ABHD16A),ENSBTAG00000000675(PGS1),ENSBTAG00000000690(THEM5),ENSBTAG00000…
CC	GO:0044432	endoplasmic reticulum part	4.5e-21	5.14879e-19	ENSBTAG00000000019(SERINC1),ENSBTAG00000000067(SDF2L1),ENSBTAG00000000073(LRPAP1),ENSBTAG00000000085(CYP1A2),ENSBTAG00000000090(SEC31B),ENSBTAG00000000099(CERS2),ENSBTAG00000000140(EPHX1),ENSBTAG00000000405(VKORC1),ENSBTAG00000000454(TMEM106C),ENSBTAG00000000459(POMGNT2),ENSBTAG00000000640(SELENOS),ENSBTAG00000000854(SEC16B),ENSBTAG00000000900(LRRC8C),ENSBTAG00000000985(RAB10),ENSBTAG00000001021(…
CC	GO:0044451	nucleoplasm part	5.1e-21	5.80118e-19	ENSBTAG00000000013(PRKAA1),ENSBTAG00000000023(RNF2),ENSBTAG00000000131(SENP3),ENSBTAG00000000252(POLE3),ENSBTAG00000000365(TDP2),ENSBTAG00000000382(MED27),ENSBTAG00000000415(ERBIN),ENSBTAG00000000423(RBM4B),ENSBTAG00000000435(TARBP2),ENSBTAG00000000504(GTF2B),ENSBTAG00000000540(RNF112),ENSBTAG00000000545(PPP4R3B),ENSBTAG00000000579(NIPBL),ENSBTAG00000000608(PRCC),ENSBTAG00000000625(SMAD6),ENSBTAG…
BP	GO:1902680	positive regulation of RNA biosynthetic process	5.2e-21	5.84654e-19	ENSBTAG00000000009(FOXF1),ENSBTAG00000000013(PRKAA1),ENSBTAG00000000039(SIRT7),ENSBTAG00000000040(MAFG),ENSBTAG00000000072(TFB2M),ENSBTAG00000000074(NFIA),ENSBTAG00000000113(ARHGEF2),ENSBTAG00000000184(EIF2AK3),ENSBTAG00000000222(ARID4B),ENSBTAG00000000231(BMPR1A),ENSBTAG00000000264(RFX6),ENSBTAG00000000305(LMO4),ENSBTAG00000000347(RHOG),ENSBTAG00000000382(MED27),ENSBTAG00000000385(ZBTB18),ENSBTA…
BP	GO:1903508	positive regulation of nucleic acid-templated transcription	5.2e-21	5.84654e-19	ENSBTAG00000000009(FOXF1),ENSBTAG00000000013(PRKAA1),ENSBTAG00000000039(SIRT7),ENSBTAG00000000040(MAFG),ENSBTAG00000000072(TFB2M),ENSBTAG00000000074(NFIA),ENSBTAG00000000113(ARHGEF2),ENSBTAG00000000184(EIF2AK3),ENSBTAG00000000222(ARID4B),ENSBTAG00000000231(BMPR1A),ENSBTAG00000000264(RFX6),ENSBTAG00000000305(LMO4),ENSBTAG00000000347(RHOG),ENSBTAG00000000382(MED27),ENSBTAG00000000385(ZBTB18),ENSBTA…
BP	GO:0032270	positive regulation of cellular protein metabolic process	6.2e-21	6.93082e-19	ENSBTAG00000000013(PRKAA1),ENSBTAG00000000031(TRPV4),ENSBTAG00000000056(STRADA),ENSBTAG00000000078(GLIPR2),ENSBTAG00000000113(ARHGEF2),ENSBTAG00000000128(FGF18),ENSBTAG00000000205(MMD),ENSBTAG00000000218(MAP2K5),ENSBTAG00000000231(BMPR1A),ENSBTAG00000000283(CSF1),ENSBTAG00000000285(GUF1),ENSBTAG00000000317(MAPK8IP1),ENSBTAG00000000354(PDE6G),ENSBTAG00000000428(BAK1),ENSBTAG00000000435(TARBP2),ENS…
BP	GO:1901360	organic cyclic compound metabolic process	8.6e-21	9.55878e-19	ENSBTAG00000000009(FOXF1),ENSBTAG00000000013(PRKAA1),ENSBTAG00000000023(RNF2),ENSBTAG00000000031(TRPV4),ENSBTAG00000000039(SIRT7),ENSBTAG00000000040(MAFG),ENSBTAG00000000042(PYCR1),ENSBTAG00000000054(SNAPC4),ENSBTAG00000000064(FEN1),ENSBTAG00000000072(TFB2M),ENSBTAG00000000074(NFIA),ENSBTAG00000000077(ADSL),ENSBTAG00000000080(GRWD1),ENSBTAG00000000085(CYP1A2),ENSBTAG00000000091(NDUFB8),ENSBTAG000…
BP	GO:0051241	negative regulation of multicellular organismal process	9.3e-21	1.02781e-18	ENSBTAG00000000020(TRPV3),ENSBTAG00000000073(LRPAP1),ENSBTAG00000000095(CD274),ENSBTAG00000000113(ARHGEF2),ENSBTAG00000000164(GNRH1),ENSBTAG00000000188(HS3ST5),ENSBTAG00000000223(PPM1B),ENSBTAG00000000231(BMPR1A),ENSBTAG00000000322(CD2AP),ENSBTAG00000000411(HGS),ENSBTAG00000000415(ERBIN),ENSBTAG00000000436(TNFAIP3),ENSBTAG00000000437(FFAR4),ENSBTAG00000000469(PPP2CA),ENSBTAG00000000494(PDE4D),ENS…
BP	GO:0071822	protein complex subunit organization	1.4e-20	1.5385e-18	ENSBTAG00000000021(WASHC3),ENSBTAG00000000026(VPS33B),ENSBTAG00000000077(ADSL),ENSBTAG00000000091(NDUFB8),ENSBTAG00000000094(ATPAF1),ENSBTAG00000000113(ARHGEF2),ENSBTAG00000000184(EIF2AK3),ENSBTAG00000000251(ALAD),ENSBTAG00000000305(LMO4),ENSBTAG00000000342(PLOD3),ENSBTAG00000000369(EPS8),ENSBTAG00000000404(NAXE),ENSBTAG00000000504(GTF2B),ENSBTAG00000000550(ATP5F1D),ENSBTAG00000000562(TOMM20),ENS…
BP	GO:0010605	negative regulation of macromolecule metabolic process	1.6e-20	1.7484e-18	ENSBTAG00000000009(FOXF1),ENSBTAG00000000013(PRKAA1),ENSBTAG00000000023(RNF2),ENSBTAG00000000031(TRPV4),ENSBTAG00000000039(SIRT7),ENSBTAG00000000073(LRPAP1),ENSBTAG00000000074(NFIA),ENSBTAG00000000076(RECK),ENSBTAG00000000092(HIF1AN),ENSBTAG00000000098(SETDB1),ENSBTAG00000000163(DDIT4),ENSBTAG00000000169(ASZ1),ENSBTAG00000000182(SPINT2),ENSBTAG00000000251(ALAD),ENSBTAG00000000252(POLE3),ENSBTAG00…
BP	GO:0043067	regulation of programmed cell death	1.7e-20	1.8473e-18	ENSBTAG00000000013(PRKAA1),ENSBTAG00000000095(CD274),ENSBTAG00000000184(EIF2AK3),ENSBTAG00000000312(GRINA),ENSBTAG00000000317(MAPK8IP1),ENSBTAG00000000340(ADNP),ENSBTAG00000000395(ADAMTS20),ENSBTAG00000000396(PIM1),ENSBTAG00000000399(NANOS3),ENSBTAG00000000418(TOX3),ENSBTAG00000000428(BAK1),ENSBTAG00000000436(TNFAIP3),ENSBTAG00000000437(FFAR4),ENSBTAG00000000484(HYAL2),ENSBTAG00000000490(RTKN),EN…
BP	GO:0042981	regulation of apoptotic process	1.8e-20	1.9451e-18	ENSBTAG00000000013(PRKAA1),ENSBTAG00000000095(CD274),ENSBTAG00000000184(EIF2AK3),ENSBTAG00000000312(GRINA),ENSBTAG00000000317(MAPK8IP1),ENSBTAG00000000340(ADNP),ENSBTAG00000000395(ADAMTS20),ENSBTAG00000000396(PIM1),ENSBTAG00000000399(NANOS3),ENSBTAG00000000418(TOX3),ENSBTAG00000000428(BAK1),ENSBTAG00000000436(TNFAIP3),ENSBTAG00000000437(FFAR4),ENSBTAG00000000484(HYAL2),ENSBTAG00000000490(RTKN),EN…
BP	GO:0048870	cell motility	2.6e-20	2.77871e-18	ENSBTAG00000000009(FOXF1),ENSBTAG00000000031(TRPV4),ENSBTAG00000000032(ABI3),ENSBTAG00000000076(RECK),ENSBTAG00000000078(GLIPR2),ENSBTAG00000000113(ARHGEF2),ENSBTAG00000000128(FGF18),ENSBTAG00000000163(DDIT4),ENSBTAG00000000164(GNRH1),ENSBTAG00000000182(SPINT2),ENSBTAG00000000231(BMPR1A),ENSBTAG00000000253(PTPRF),ENSBTAG00000000283(CSF1),ENSBTAG00000000305(LMO4),ENSBTAG00000000329(MEGF10),ENSBTAG…
BP	GO:0051674	localization of cell	2.6e-20	2.77871e-18	ENSBTAG00000000009(FOXF1),ENSBTAG00000000031(TRPV4),ENSBTAG00000000032(ABI3),ENSBTAG00000000076(RECK),ENSBTAG00000000078(GLIPR2),ENSBTAG00000000113(ARHGEF2),ENSBTAG00000000128(FGF18),ENSBTAG00000000163(DDIT4),ENSBTAG00000000164(GNRH1),ENSBTAG00000000182(SPINT2),ENSBTAG00000000231(BMPR1A),ENSBTAG00000000253(PTPRF),ENSBTAG00000000283(CSF1),ENSBTAG00000000305(LMO4),ENSBTAG00000000329(MEGF10),ENSBTAG…
BP	GO:0080134	regulation of response to stress	3.2e-20	3.40127e-18	ENSBTAG00000000009(FOXF1),ENSBTAG00000000016(LTA),ENSBTAG00000000026(VPS33B),ENSBTAG00000000031(TRPV4),ENSBTAG00000000042(PYCR1),ENSBTAG00000000184(EIF2AK3),ENSBTAG00000000223(PPM1B),ENSBTAG00000000231(BMPR1A),ENSBTAG00000000253(PTPRF),ENSBTAG00000000312(GRINA),ENSBTAG00000000317(MAPK8IP1),ENSBTAG00000000415(ERBIN),ENSBTAG00000000428(BAK1),ENSBTAG00000000435(TARBP2),ENSBTAG00000000436(TNFAIP3),EN…
BP	GO:0048646	anatomical structure formation involved in morphogenesis	3.3e-20	3.46964e-18	ENSBTAG00000000009(FOXF1),ENSBTAG00000000057(THBS3),ENSBTAG00000000076(RECK),ENSBTAG00000000128(FGF18),ENSBTAG00000000182(SPINT2),ENSBTAG00000000184(EIF2AK3),ENSBTAG00000000231(BMPR1A),ENSBTAG00000000292(TCIRG1),ENSBTAG00000000305(LMO4),ENSBTAG00000000396(PIM1),ENSBTAG00000000411(HGS),ENSBTAG00000000436(TNFAIP3),ENSBTAG00000000483(HYAL1),ENSBTAG00000000541(NKX2-1),ENSBTAG00000000569(HES1),ENSBTAG…
BP	GO:0045595	regulation of cell differentiation	3.3e-20	3.46964e-18	ENSBTAG00000000009(FOXF1),ENSBTAG00000000031(TRPV4),ENSBTAG00000000040(MAFG),ENSBTAG00000000076(RECK),ENSBTAG00000000078(GLIPR2),ENSBTAG00000000092(HIF1AN),ENSBTAG00000000113(ARHGEF2),ENSBTAG00000000128(FGF18),ENSBTAG00000000164(GNRH1),ENSBTAG00000000205(MMD),ENSBTAG00000000231(BMPR1A),ENSBTAG00000000253(PTPRF),ENSBTAG00000000283(CSF1),ENSBTAG00000000292(TCIRG1),ENSBTAG00000000305(LMO4),ENSBTAG00…
BP	GO:0031324	negative regulation of cellular metabolic process	3.4e-20	3.55556e-18	ENSBTAG00000000009(FOXF1),ENSBTAG00000000013(PRKAA1),ENSBTAG00000000023(RNF2),ENSBTAG00000000031(TRPV4),ENSBTAG00000000039(SIRT7),ENSBTAG00000000073(LRPAP1),ENSBTAG00000000074(NFIA),ENSBTAG00000000076(RECK),ENSBTAG00000000092(HIF1AN),ENSBTAG00000000098(SETDB1),ENSBTAG00000000163(DDIT4),ENSBTAG00000000182(SPINT2),ENSBTAG00000000251(ALAD),ENSBTAG00000000252(POLE3),ENSBTAG00000000266(NAB1),ENSBTAG00…
BP	GO:0060341	regulation of cellular localization	5.1e-20	5.30482e-18	ENSBTAG00000000009(FOXF1),ENSBTAG00000000013(PRKAA1),ENSBTAG00000000231(BMPR1A),ENSBTAG00000000257(MRAP2),ENSBTAG00000000264(RFX6),ENSBTAG00000000322(CD2AP),ENSBTAG00000000347(RHOG),ENSBTAG00000000428(BAK1),ENSBTAG00000000484(HYAL2),ENSBTAG00000000494(PDE4D),ENSBTAG00000000500(PINX1),ENSBTAG00000000511(CNST),ENSBTAG00000000529(BTBD9),ENSBTAG00000000546(TOB1),ENSBTAG00000000579(NIPBL),ENSBTAG00000…
BP	GO:0045893	positive regulation of transcription, DNA-templated	7.2e-20	7.44932e-18	ENSBTAG00000000009(FOXF1),ENSBTAG00000000013(PRKAA1),ENSBTAG00000000039(SIRT7),ENSBTAG00000000040(MAFG),ENSBTAG00000000072(TFB2M),ENSBTAG00000000074(NFIA),ENSBTAG00000000113(ARHGEF2),ENSBTAG00000000184(EIF2AK3),ENSBTAG00000000222(ARID4B),ENSBTAG00000000231(BMPR1A),ENSBTAG00000000264(RFX6),ENSBTAG00000000305(LMO4),ENSBTAG00000000347(RHOG),ENSBTAG00000000385(ZBTB18),ENSBTAG00000000396(PIM1),ENSBTAG…
BP	GO:0051240	positive regulation of multicellular organismal process	1.1e-19	1.13207e-17	ENSBTAG00000000013(PRKAA1),ENSBTAG00000000016(LTA),ENSBTAG00000000031(TRPV4),ENSBTAG00000000078(GLIPR2),ENSBTAG00000000095(CD274),ENSBTAG00000000113(ARHGEF2),ENSBTAG00000000128(FGF18),ENSBTAG00000000130(TNFSF13),ENSBTAG00000000184(EIF2AK3),ENSBTAG00000000205(MMD),ENSBTAG00000000231(BMPR1A),ENSBTAG00000000259(CHIA),ENSBTAG00000000283(CSF1),ENSBTAG00000000396(PIM1),ENSBTAG00000000436(TNFAIP3),ENSBT…
MF	GO:0016772	transferase activity, transferring phosphorus-containing groups	1.3e-19	1.32389e-17	ENSBTAG00000000005(GRK3),ENSBTAG00000000013(PRKAA1),ENSBTAG00000000056(STRADA),ENSBTAG00000000065(CRLS1),ENSBTAG00000000081(COL4A3BP),ENSBTAG00000000111(UGP2),ENSBTAG00000000184(EIF2AK3),ENSBTAG00000000205(MMD),ENSBTAG00000000212(NADK),ENSBTAG00000000218(MAP2K5),ENSBTAG00000000220(NEK10),ENSBTAG00000000225(POLB),ENSBTAG00000000231(BMPR1A),ENSBTAG00000000252(POLE3),ENSBTAG00000000286(PFKM),ENSBTAG…
BP	GO:0009719	response to endogenous stimulus	1.3e-19	1.32389e-17	ENSBTAG00000000013(PRKAA1),ENSBTAG00000000031(TRPV4),ENSBTAG00000000113(ARHGEF2),ENSBTAG00000000128(FGF18),ENSBTAG00000000163(DDIT4),ENSBTAG00000000164(GNRH1),ENSBTAG00000000215(GNB1),ENSBTAG00000000231(BMPR1A),ENSBTAG00000000438(GNRHR),ENSBTAG00000000483(HYAL1),ENSBTAG00000000484(HYAL2),ENSBTAG00000000494(PDE4D),ENSBTAG00000000507(NR4A1),ENSBTAG00000000541(NKX2-1),ENSBTAG00000000546(TOB1),ENSBTA…
BP	GO:0006928	movement of cell or subcellular component	2.3e-19	2.33007e-17	ENSBTAG00000000009(FOXF1),ENSBTAG00000000031(TRPV4),ENSBTAG00000000032(ABI3),ENSBTAG00000000076(RECK),ENSBTAG00000000078(GLIPR2),ENSBTAG00000000088(ALCAM),ENSBTAG00000000113(ARHGEF2),ENSBTAG00000000128(FGF18),ENSBTAG00000000163(DDIT4),ENSBTAG00000000164(GNRH1),ENSBTAG00000000182(SPINT2),ENSBTAG00000000231(BMPR1A),ENSBTAG00000000253(PTPRF),ENSBTAG00000000283(CSF1),ENSBTAG00000000305(LMO4),ENSBTAG0…
BP	GO:0046483	heterocycle metabolic process	2.5e-19	2.51956e-17	ENSBTAG00000000009(FOXF1),ENSBTAG00000000013(PRKAA1),ENSBTAG00000000023(RNF2),ENSBTAG00000000031(TRPV4),ENSBTAG00000000039(SIRT7),ENSBTAG00000000040(MAFG),ENSBTAG00000000042(PYCR1),ENSBTAG00000000054(SNAPC4),ENSBTAG00000000064(FEN1),ENSBTAG00000000072(TFB2M),ENSBTAG00000000074(NFIA),ENSBTAG00000000077(ADSL),ENSBTAG00000000080(GRWD1),ENSBTAG00000000085(CYP1A2),ENSBTAG00000000091(NDUFB8),ENSBTAG000…
BP	GO:1902533	positive regulation of intracellular signal transduction	3e-19	3.00789e-17	ENSBTAG00000000031(TRPV4),ENSBTAG00000000078(GLIPR2),ENSBTAG00000000128(FGF18),ENSBTAG00000000218(MAP2K5),ENSBTAG00000000283(CSF1),ENSBTAG00000000317(MAPK8IP1),ENSBTAG00000000354(PDE6G),ENSBTAG00000000437(FFAR4),ENSBTAG00000000476(THPO),ENSBTAG00000000548(KLHDC10),ENSBTAG00000000563(MYD88),ENSBTAG00000000569(HES1),ENSBTAG00000000570(RET),ENSBTAG00000000604(GPNMB),ENSBTAG00000000696(ILK),ENSBTAG00…
BP	GO:0051049	regulation of transport	3.5e-19	3.49121e-17	ENSBTAG00000000009(FOXF1),ENSBTAG00000000013(PRKAA1),ENSBTAG00000000031(TRPV4),ENSBTAG00000000073(LRPAP1),ENSBTAG00000000082(KCNJ14),ENSBTAG00000000095(CD274),ENSBTAG00000000231(BMPR1A),ENSBTAG00000000259(CHIA),ENSBTAG00000000264(RFX6),ENSBTAG00000000279(RAB26),ENSBTAG00000000286(PFKM),ENSBTAG00000000292(TCIRG1),ENSBTAG00000000322(CD2AP),ENSBTAG00000000411(HGS),ENSBTAG00000000428(BAK1),ENSBTAG000…
BP	GO:1901700	response to oxygen-containing compound	3.7e-19	3.67187e-17	ENSBTAG00000000013(PRKAA1),ENSBTAG00000000031(TRPV4),ENSBTAG00000000042(PYCR1),ENSBTAG00000000095(CD274),ENSBTAG00000000113(ARHGEF2),ENSBTAG00000000163(DDIT4),ENSBTAG00000000164(GNRH1),ENSBTAG00000000215(GNB1),ENSBTAG00000000264(RFX6),ENSBTAG00000000369(EPS8),ENSBTAG00000000396(PIM1),ENSBTAG00000000415(ERBIN),ENSBTAG00000000436(TNFAIP3),ENSBTAG00000000438(GNRHR),ENSBTAG00000000442(RBP4),ENSBTAG00…
BP	GO:0042592	homeostatic process	3.8e-19	3.75197e-17	ENSBTAG00000000013(PRKAA1),ENSBTAG00000000014(TXN2),ENSBTAG00000000031(TRPV4),ENSBTAG00000000081(COL4A3BP),ENSBTAG00000000203(ATP6V1G1),ENSBTAG00000000225(POLB),ENSBTAG00000000241(STAU1),ENSBTAG00000000257(MRAP2),ENSBTAG00000000264(RFX6),ENSBTAG00000000267(SMG6),ENSBTAG00000000283(CSF1),ENSBTAG00000000286(PFKM),ENSBTAG00000000292(TCIRG1),ENSBTAG00000000312(GRINA),ENSBTAG00000000428(BAK1),ENSBTAG0…
CC	GO:0042175	nuclear outer membrane-endoplasmic reticulum membrane network	4.1e-19	4.02773e-17	ENSBTAG00000000019(SERINC1),ENSBTAG00000000067(SDF2L1),ENSBTAG00000000085(CYP1A2),ENSBTAG00000000099(CERS2),ENSBTAG00000000140(EPHX1),ENSBTAG00000000152(RANBP2),ENSBTAG00000000405(VKORC1),ENSBTAG00000000454(TMEM106C),ENSBTAG00000000459(POMGNT2),ENSBTAG00000000640(SELENOS),ENSBTAG00000000900(LRRC8C),ENSBTAG00000000985(RAB10),ENSBTAG00000001021(CYP1A1),ENSBTAG00000001212(SSR2),ENSBTAG00000001258(TM…
CC	GO:0098827	endoplasmic reticulum subcompartment	1.7e-18	1.65334e-16	ENSBTAG00000000019(SERINC1),ENSBTAG00000000067(SDF2L1),ENSBTAG00000000085(CYP1A2),ENSBTAG00000000099(CERS2),ENSBTAG00000000140(EPHX1),ENSBTAG00000000405(VKORC1),ENSBTAG00000000454(TMEM106C),ENSBTAG00000000459(POMGNT2),ENSBTAG00000000640(SELENOS),ENSBTAG00000000900(LRRC8C),ENSBTAG00000000985(RAB10),ENSBTAG00000001021(CYP1A1),ENSBTAG00000001212(SSR2),ENSBTAG00000001258(TMEM50B),ENSBTAG00000001299(C…
CC	GO:0005730	nucleolus	1.7e-18	1.65334e-16	ENSBTAG00000000014(TXN2),ENSBTAG00000000030(RDM1),ENSBTAG00000000039(SIRT7),ENSBTAG00000000053(FILIP1),ENSBTAG00000000064(FEN1),ENSBTAG00000000080(GRWD1),ENSBTAG00000000128(FGF18),ENSBTAG00000000131(SENP3),ENSBTAG00000000197(TRMT10A),ENSBTAG00000000223(PPM1B),ENSBTAG00000000264(RFX6),ENSBTAG00000000267(SMG6),ENSBTAG00000000297(ZNF330),ENSBTAG00000000356(CCDC137),ENSBTAG00000000365(TDP2),ENSBTAG00…
BP	GO:0051338	regulation of transferase activity	1.8e-18	1.74188e-16	ENSBTAG00000000056(STRADA),ENSBTAG00000000128(FGF18),ENSBTAG00000000152(RANBP2),ENSBTAG00000000205(MMD),ENSBTAG00000000218(MAP2K5),ENSBTAG00000000283(CSF1),ENSBTAG00000000305(LMO4),ENSBTAG00000000354(PDE6G),ENSBTAG00000000411(HGS),ENSBTAG00000000436(TNFAIP3),ENSBTAG00000000469(PPP2CA),ENSBTAG00000000484(HYAL2),ENSBTAG00000000500(PINX1),ENSBTAG00000000570(RET),ENSBTAG00000000599(CCNI),ENSBTAG00000…
BP	GO:0051172	negative regulation of nitrogen compound metabolic process	1.9e-18	1.82955e-16	ENSBTAG00000000009(FOXF1),ENSBTAG00000000013(PRKAA1),ENSBTAG00000000023(RNF2),ENSBTAG00000000031(TRPV4),ENSBTAG00000000039(SIRT7),ENSBTAG00000000074(NFIA),ENSBTAG00000000076(RECK),ENSBTAG00000000092(HIF1AN),ENSBTAG00000000098(SETDB1),ENSBTAG00000000163(DDIT4),ENSBTAG00000000182(SPINT2),ENSBTAG00000000251(ALAD),ENSBTAG00000000252(POLE3),ENSBTAG00000000266(NAB1),ENSBTAG00000000267(SMG6),ENSBTAG0000…
BP	GO:0022603	regulation of anatomical structure morphogenesis	2.1e-18	2.01217e-16	ENSBTAG00000000076(RECK),ENSBTAG00000000128(FGF18),ENSBTAG00000000231(BMPR1A),ENSBTAG00000000283(CSF1),ENSBTAG00000000347(RHOG),ENSBTAG00000000369(EPS8),ENSBTAG00000000396(PIM1),ENSBTAG00000000411(HGS),ENSBTAG00000000436(TNFAIP3),ENSBTAG00000000483(HYAL1),ENSBTAG00000000569(HES1),ENSBTAG00000000570(RET),ENSBTAG00000000588(CHODL),ENSBTAG00000000653(PPP1R16B),ENSBTAG00000000745(AQP1),ENSBTAG0000000…
BP	GO:0006461	protein complex assembly	2.7e-18	2.5494e-16	ENSBTAG00000000021(WASHC3),ENSBTAG00000000077(ADSL),ENSBTAG00000000091(NDUFB8),ENSBTAG00000000094(ATPAF1),ENSBTAG00000000113(ARHGEF2),ENSBTAG00000000184(EIF2AK3),ENSBTAG00000000251(ALAD),ENSBTAG00000000305(LMO4),ENSBTAG00000000369(EPS8),ENSBTAG00000000404(NAXE),ENSBTAG00000000504(GTF2B),ENSBTAG00000000550(ATP5F1D),ENSBTAG00000000562(TOMM20),ENSBTAG00000000564(NSG2),ENSBTAG00000000613(ELAVL1),ENSB…
BP	GO:0070271	protein complex biogenesis	2.7e-18	2.5494e-16	ENSBTAG00000000021(WASHC3),ENSBTAG00000000077(ADSL),ENSBTAG00000000091(NDUFB8),ENSBTAG00000000094(ATPAF1),ENSBTAG00000000113(ARHGEF2),ENSBTAG00000000184(EIF2AK3),ENSBTAG00000000251(ALAD),ENSBTAG00000000305(LMO4),ENSBTAG00000000369(EPS8),ENSBTAG00000000404(NAXE),ENSBTAG00000000504(GTF2B),ENSBTAG00000000550(ATP5F1D),ENSBTAG00000000562(TOMM20),ENSBTAG00000000564(NSG2),ENSBTAG00000000613(ELAVL1),ENSB…
CC	GO:0005856	cytoskeleton	2.7e-18	2.5494e-16	ENSBTAG00000000049(CCDC77),ENSBTAG00000000053(FILIP1),ENSBTAG00000000113(ARHGEF2),ENSBTAG00000000146(FARP1),ENSBTAG00000000147(RIC8B),ENSBTAG00000000197(TRMT10A),ENSBTAG00000000218(MAP2K5),ENSBTAG00000000225(POLB),ENSBTAG00000000271(MNS1),ENSBTAG00000000322(CD2AP),ENSBTAG00000000371(DIS3L),ENSBTAG00000000400(KRT85),ENSBTAG00000000458(DYNC1LI2),ENSBTAG00000000462(CCDC102A),ENSBTAG00000000469(PPP2C…
BP	GO:0006725	cellular aromatic compound metabolic process	2.9e-18	2.72502e-16	ENSBTAG00000000009(FOXF1),ENSBTAG00000000013(PRKAA1),ENSBTAG00000000023(RNF2),ENSBTAG00000000031(TRPV4),ENSBTAG00000000039(SIRT7),ENSBTAG00000000040(MAFG),ENSBTAG00000000054(SNAPC4),ENSBTAG00000000064(FEN1),ENSBTAG00000000072(TFB2M),ENSBTAG00000000074(NFIA),ENSBTAG00000000077(ADSL),ENSBTAG00000000080(GRWD1),ENSBTAG00000000085(CYP1A2),ENSBTAG00000000091(NDUFB8),ENSBTAG00000000092(HIF1AN),ENSBTAG00…
CC	GO:0044431	Golgi apparatus part	3.7e-18	3.46003e-16	ENSBTAG00000000025(RAB6A),ENSBTAG00000000078(GLIPR2),ENSBTAG00000000090(SEC31B),ENSBTAG00000000274(YKT6),ENSBTAG00000000279(RAB26),ENSBTAG00000000342(PLOD3),ENSBTAG00000000379(GOLT1B),ENSBTAG00000000390(TPST1),ENSBTAG00000000414(FUT6),ENSBTAG00000000511(CNST),ENSBTAG00000000564(NSG2),ENSBTAG00000000676(DOP1A),ENSBTAG00000000703(ST6GAL2),ENSBTAG00000000795(NMNAT2),ENSBTAG00000000799(ICA1),ENSBTAG0…
BP	GO:0009605	response to external stimulus	4.2e-18	3.90881e-16	ENSBTAG00000000009(FOXF1),ENSBTAG00000000013(PRKAA1),ENSBTAG00000000016(LTA),ENSBTAG00000000026(VPS33B),ENSBTAG00000000029(LYZL6),ENSBTAG00000000031(TRPV4),ENSBTAG00000000088(ALCAM),ENSBTAG00000000095(CD274),ENSBTAG00000000128(FGF18),ENSBTAG00000000163(DDIT4),ENSBTAG00000000184(EIF2AK3),ENSBTAG00000000223(PPM1B),ENSBTAG00000000244(NRXN2),ENSBTAG00000000253(PTPRF),ENSBTAG00000000283(CSF1),ENSBTAG0…
MF	GO:0042803	protein homodimerization activity	4.5e-18	4.16807e-16	ENSBTAG00000000078(GLIPR2),ENSBTAG00000000092(HIF1AN),ENSBTAG00000000231(BMPR1A),ENSBTAG00000000283(CSF1),ENSBTAG00000000286(PFKM),ENSBTAG00000000390(TPST1),ENSBTAG00000000404(NAXE),ENSBTAG00000000418(TOX3),ENSBTAG00000000428(BAK1),ENSBTAG00000000435(TARBP2),ENSBTAG00000000505(KYAT3),ENSBTAG00000000507(NR4A1),ENSBTAG00000000569(HES1),ENSBTAG00000000613(ELAVL1),ENSBTAG00000000644(S100A5),ENSBTAG00…
BP	GO:0044255	cellular lipid metabolic process	5.4e-18	4.97798e-16	ENSBTAG00000000013(PRKAA1),ENSBTAG00000000019(SERINC1),ENSBTAG00000000065(CRLS1),ENSBTAG00000000081(COL4A3BP),ENSBTAG00000000085(CYP1A2),ENSBTAG00000000099(CERS2),ENSBTAG00000000123(HAO2),ENSBTAG00000000301,ENSBTAG00000000442(RBP4),ENSBTAG00000000541(NKX2-1),ENSBTAG00000000578(ABHD16A),ENSBTAG00000000675(PGS1),ENSBTAG00000000690(THEM5),ENSBTAG00000000710(PIP5K1C),ENSBTAG00000000717(PLPP2),ENSBTAG…
MF	GO:0016301	kinase activity	5.5e-18	5.04625e-16	ENSBTAG00000000005(GRK3),ENSBTAG00000000013(PRKAA1),ENSBTAG00000000056(STRADA),ENSBTAG00000000081(COL4A3BP),ENSBTAG00000000184(EIF2AK3),ENSBTAG00000000205(MMD),ENSBTAG00000000212(NADK),ENSBTAG00000000218(MAP2K5),ENSBTAG00000000220(NEK10),ENSBTAG00000000231(BMPR1A),ENSBTAG00000000286(PFKM),ENSBTAG00000000301,ENSBTAG00000000306(ITK),ENSBTAG00000000357(PRAG1),ENSBTAG00000000377(BMX),ENSBTAG000000003…
BP	GO:0033043	regulation of organelle organization	5.9e-18	5.38784e-16	ENSBTAG00000000013(PRKAA1),ENSBTAG00000000064(FEN1),ENSBTAG00000000098(SETDB1),ENSBTAG00000000113(ARHGEF2),ENSBTAG00000000267(SMG6),ENSBTAG00000000271(MNS1),ENSBTAG00000000322(CD2AP),ENSBTAG00000000343(ZNHIT1),ENSBTAG00000000347(RHOG),ENSBTAG00000000369(EPS8),ENSBTAG00000000500(PINX1),ENSBTAG00000000502(DAZL),ENSBTAG00000000579(NIPBL),ENSBTAG00000000599(CCNI),ENSBTAG00000000684(ARHGEF10L),ENSBTAG…
BP	GO:0072359	circulatory system development	6e-18	5.45355e-16	ENSBTAG00000000009(FOXF1),ENSBTAG00000000076(RECK),ENSBTAG00000000081(COL4A3BP),ENSBTAG00000000128(FGF18),ENSBTAG00000000184(EIF2AK3),ENSBTAG00000000218(MAP2K5),ENSBTAG00000000231(BMPR1A),ENSBTAG00000000305(LMO4),ENSBTAG00000000396(PIM1),ENSBTAG00000000411(HGS),ENSBTAG00000000428(BAK1),ENSBTAG00000000483(HYAL1),ENSBTAG00000000569(HES1),ENSBTAG00000000579(NIPBL),ENSBTAG00000000625(SMAD6),ENSBTAG00…
BP	GO:0006139	nucleobase-containing compound metabolic process	6.6e-18	5.971e-16	ENSBTAG00000000009(FOXF1),ENSBTAG00000000013(PRKAA1),ENSBTAG00000000023(RNF2),ENSBTAG00000000031(TRPV4),ENSBTAG00000000039(SIRT7),ENSBTAG00000000040(MAFG),ENSBTAG00000000054(SNAPC4),ENSBTAG00000000064(FEN1),ENSBTAG00000000072(TFB2M),ENSBTAG00000000074(NFIA),ENSBTAG00000000077(ADSL),ENSBTAG00000000080(GRWD1),ENSBTAG00000000091(NDUFB8),ENSBTAG00000000092(HIF1AN),ENSBTAG00000000098(SETDB1),ENSBTAG00…
BP	GO:0010942	positive regulation of cell death	7.9e-18	7.11402e-16	ENSBTAG00000000095(CD274),ENSBTAG00000000163(DDIT4),ENSBTAG00000000243(HEBP2),ENSBTAG00000000428(BAK1),ENSBTAG00000000484(HYAL2),ENSBTAG00000000507(NR4A1),ENSBTAG00000000738(DAPK1),ENSBTAG00000000753(PIAS4),ENSBTAG00000001069(TP53),ENSBTAG00000001083(MAP3K20),ENSBTAG00000001096(PRKRA),ENSBTAG00000001165(AIFM2),ENSBTAG00000001221(NKX3-1),ENSBTAG00000001273(NLRP3),ENSBTAG00000001333(PPARG),ENSBTAG0…
BP	GO:0051094	positive regulation of developmental process	1.1e-17	9.81472e-16	ENSBTAG00000000013(PRKAA1),ENSBTAG00000000078(GLIPR2),ENSBTAG00000000092(HIF1AN),ENSBTAG00000000095(CD274),ENSBTAG00000000113(ARHGEF2),ENSBTAG00000000128(FGF18),ENSBTAG00000000130(TNFSF13),ENSBTAG00000000205(MMD),ENSBTAG00000000231(BMPR1A),ENSBTAG00000000283(CSF1),ENSBTAG00000000395(ADAMTS20),ENSBTAG00000000396(PIM1),ENSBTAG00000000435(TARBP2),ENSBTAG00000000436(TNFAIP3),ENSBTAG00000000476(THPO),…
CC	GO:0005789	endoplasmic reticulum membrane	1.1e-17	9.81472e-16	ENSBTAG00000000019(SERINC1),ENSBTAG00000000067(SDF2L1),ENSBTAG00000000085(CYP1A2),ENSBTAG00000000099(CERS2),ENSBTAG00000000140(EPHX1),ENSBTAG00000000405(VKORC1),ENSBTAG00000000454(TMEM106C),ENSBTAG00000000459(POMGNT2),ENSBTAG00000000640(SELENOS),ENSBTAG00000000900(LRRC8C),ENSBTAG00000000985(RAB10),ENSBTAG00000001021(CYP1A1),ENSBTAG00000001212(SSR2),ENSBTAG00000001258(TMEM50B),ENSBTAG00000001299(C…
CC	GO:0048471	perinuclear region of cytoplasm	1.3e-17	1.14938e-15	ENSBTAG00000000026(VPS33B),ENSBTAG00000000057(THBS3),ENSBTAG00000000081(COL4A3BP),ENSBTAG00000000092(HIF1AN),ENSBTAG00000000283(CSF1),ENSBTAG00000000399(NANOS3),ENSBTAG00000000435(TARBP2),ENSBTAG00000000484(HYAL2),ENSBTAG00000000588(CHODL),ENSBTAG00000000634(MLPH),ENSBTAG00000000653(PPP1R16B),ENSBTAG00000000694(TAF10),ENSBTAG00000000711(NDRG1),ENSBTAG00000000771(DNAJB6),ENSBTAG00000000778(HSP90AB…
CC	GO:0044433	cytoplasmic vesicle part	1.3e-17	1.14938e-15	ENSBTAG00000000026(VPS33B),ENSBTAG00000000090(SEC31B),ENSBTAG00000000095(CD274),ENSBTAG00000000224(TSPAN15),ENSBTAG00000000260(ZNRF2),ENSBTAG00000000274(YKT6),ENSBTAG00000000279(RAB26),ENSBTAG00000000292(TCIRG1),ENSBTAG00000000320(UBAP1),ENSBTAG00000000344(SPACA3),ENSBTAG00000000411(HGS),ENSBTAG00000000564(NSG2),ENSBTAG00000000570(RET),ENSBTAG00000000710(PIP5K1C),ENSBTAG00000000711(NDRG1),ENSBTAG…
BP	GO:0002682	regulation of immune system process	1.6e-17	1.40822e-15	ENSBTAG00000000009(FOXF1),ENSBTAG00000000016(LTA),ENSBTAG00000000031(TRPV4),ENSBTAG00000000095(CD274),ENSBTAG00000000130(TNFSF13),ENSBTAG00000000223(PPM1B),ENSBTAG00000000283(CSF1),ENSBTAG00000000306(ITK),ENSBTAG00000000317(MAPK8IP1),ENSBTAG00000000377(BMX),ENSBTAG00000000396(PIM1),ENSBTAG00000000415(ERBIN),ENSBTAG00000000435(TARBP2),ENSBTAG00000000436(TNFAIP3),ENSBTAG00000000476(THPO),ENSBTAG000…
BP	GO:1901565	organonitrogen compound catabolic process	1.9e-17	1.66473e-15	ENSBTAG00000000010(UBL7),ENSBTAG00000000011(TDH),ENSBTAG00000000067(SDF2L1),ENSBTAG00000000120(USP43),ENSBTAG00000000149(USP40),ENSBTAG00000000201(LTN1),ENSBTAG00000000251(ALAD),ENSBTAG00000000259(CHIA),ENSBTAG00000000279(RAB26),ENSBTAG00000000292(TCIRG1),ENSBTAG00000000320(UBAP1),ENSBTAG00000000436(TNFAIP3),ENSBTAG00000000483(HYAL1),ENSBTAG00000000484(HYAL2),ENSBTAG00000000494(PDE4D),ENSBTAG0000…
BP	GO:0051640	organelle localization	2.5e-17	2.18061e-15	ENSBTAG00000000009(FOXF1),ENSBTAG00000000026(VPS33B),ENSBTAG00000000113(ARHGEF2),ENSBTAG00000000152(RANBP2),ENSBTAG00000000274(YKT6),ENSBTAG00000000458(DYNC1LI2),ENSBTAG00000000460(SYTL2),ENSBTAG00000000500(PINX1),ENSBTAG00000000529(BTBD9),ENSBTAG00000000660(FAM83D),ENSBTAG00000000764(GIPC1),ENSBTAG00000000854(SEC16B),ENSBTAG00000000985(RAB10),ENSBTAG00000001028(MAP6),ENSBTAG00000001037(MAP4K2),E…
MF	GO:0098772	molecular function regulator	2.6e-17	2.25771e-15	ENSBTAG00000000016(LTA),ENSBTAG00000000056(STRADA),ENSBTAG00000000073(LRPAP1),ENSBTAG00000000076(RECK),ENSBTAG00000000113(ARHGEF2),ENSBTAG00000000128(FGF18),ENSBTAG00000000130(TNFSF13),ENSBTAG00000000146(FARP1),ENSBTAG00000000147(RIC8B),ENSBTAG00000000152(RANBP2),ENSBTAG00000000164(GNRH1),ENSBTAG00000000182(SPINT2),ENSBTAG00000000210(ARHGAP31),ENSBTAG00000000257(MRAP2),ENSBTAG00000000283(CSF1),EN…
BP	GO:0018193	peptidyl-amino acid modification	3.6e-17	3.11216e-15	ENSBTAG00000000013(PRKAA1),ENSBTAG00000000025(RAB6A),ENSBTAG00000000026(VPS33B),ENSBTAG00000000037(CWC27),ENSBTAG00000000092(HIF1AN),ENSBTAG00000000098(SETDB1),ENSBTAG00000000113(ARHGEF2),ENSBTAG00000000131(SENP3),ENSBTAG00000000152(RANBP2),ENSBTAG00000000163(DDIT4),ENSBTAG00000000222(ARID4B),ENSBTAG00000000252(POLE3),ENSBTAG00000000306(ITK),ENSBTAG00000000342(PLOD3),ENSBTAG00000000377(BMX),ENSBT…
BP	GO:0051248	negative regulation of protein metabolic process	4.1e-17	3.52872e-15	ENSBTAG00000000013(PRKAA1),ENSBTAG00000000076(RECK),ENSBTAG00000000163(DDIT4),ENSBTAG00000000182(SPINT2),ENSBTAG00000000251(ALAD),ENSBTAG00000000399(NANOS3),ENSBTAG00000000428(BAK1),ENSBTAG00000000435(TARBP2),ENSBTAG00000000436(TNFAIP3),ENSBTAG00000000484(HYAL2),ENSBTAG00000000494(PDE4D),ENSBTAG00000000500(PINX1),ENSBTAG00000000507(NR4A1),ENSBTAG00000000512(SNTA1),ENSBTAG00000000522(AHSG),ENSBTAG…
CC	GO:0016604	nuclear body	4.2e-17	3.59886e-15	ENSBTAG00000000013(PRKAA1),ENSBTAG00000000023(RNF2),ENSBTAG00000000365(TDP2),ENSBTAG00000000415(ERBIN),ENSBTAG00000000423(RBM4B),ENSBTAG00000000435(TARBP2),ENSBTAG00000000504(GTF2B),ENSBTAG00000000540(RNF112),ENSBTAG00000000545(PPP4R3B),ENSBTAG00000000608(PRCC),ENSBTAG00000000625(SMAD6),ENSBTAG00000000653(PPP1R16B),ENSBTAG00000000656(NFATC1),ENSBTAG00000000662(TCF20),ENSBTAG00000001002(TCF7),ENSB…
BP	GO:0043068	positive regulation of programmed cell death	5.8e-17	4.94806e-15	ENSBTAG00000000095(CD274),ENSBTAG00000000428(BAK1),ENSBTAG00000000484(HYAL2),ENSBTAG00000000507(NR4A1),ENSBTAG00000000738(DAPK1),ENSBTAG00000000753(PIAS4),ENSBTAG00000001069(TP53),ENSBTAG00000001083(MAP3K20),ENSBTAG00000001096(PRKRA),ENSBTAG00000001165(AIFM2),ENSBTAG00000001221(NKX3-1),ENSBTAG00000001273(NLRP3),ENSBTAG00000001333(PPARG),ENSBTAG00000001403(PRKCI),ENSBTAG00000001511(BCL6),ENSBTAG00…
BP	GO:0043065	positive regulation of apoptotic process	6e-17	5.09633e-15	ENSBTAG00000000095(CD274),ENSBTAG00000000428(BAK1),ENSBTAG00000000484(HYAL2),ENSBTAG00000000507(NR4A1),ENSBTAG00000000738(DAPK1),ENSBTAG00000000753(PIAS4),ENSBTAG00000001069(TP53),ENSBTAG00000001083(MAP3K20),ENSBTAG00000001096(PRKRA),ENSBTAG00000001165(AIFM2),ENSBTAG00000001221(NKX3-1),ENSBTAG00000001273(NLRP3),ENSBTAG00000001333(PPARG),ENSBTAG00000001403(PRKCI),ENSBTAG00000001511(BCL6),ENSBTAG00…
CC	GO:0005768	endosome	7.4e-17	6.25815e-15	ENSBTAG00000000026(VPS33B),ENSBTAG00000000073(LRPAP1),ENSBTAG00000000095(CD274),ENSBTAG00000000224(TSPAN15),ENSBTAG00000000274(YKT6),ENSBTAG00000000292(TCIRG1),ENSBTAG00000000320(UBAP1),ENSBTAG00000000411(HGS),ENSBTAG00000000540(RNF112),ENSBTAG00000000564(NSG2),ENSBTAG00000000570(RET),ENSBTAG00000000616(GPR161),ENSBTAG00000000676(DOP1A),ENSBTAG00000000710(PIP5K1C),ENSBTAG00000000711(NDRG1),ENSBTA…
MF	GO:0032553	ribonucleotide binding	7.5e-17	6.31526e-15	ENSBTAG00000000005(GRK3),ENSBTAG00000000013(PRKAA1),ENSBTAG00000000025(RAB6A),ENSBTAG00000000056(STRADA),ENSBTAG00000000062(RASL12),ENSBTAG00000000105(RIT1),ENSBTAG00000000123(HAO2),ENSBTAG00000000132(EIF4A1),ENSBTAG00000000184(EIF2AK3),ENSBTAG00000000218(MAP2K5),ENSBTAG00000000220(NEK10),ENSBTAG00000000231(BMPR1A),ENSBTAG00000000279(RAB26),ENSBTAG00000000285(GUF1),ENSBTAG00000000286(PFKM),ENSBTA…
BP	GO:0000278	mitotic cell cycle	9.1e-17	7.62949e-15	ENSBTAG00000000023(RNF2),ENSBTAG00000000039(SIRT7),ENSBTAG00000000113(ARHGEF2),ENSBTAG00000000369(EPS8),ENSBTAG00000000372(TIPIN),ENSBTAG00000000483(HYAL1),ENSBTAG00000000490(RTKN),ENSBTAG00000000500(PINX1),ENSBTAG00000000569(HES1),ENSBTAG00000000579(NIPBL),ENSBTAG00000000590(POLE),ENSBTAG00000000599(CCNI),ENSBTAG00000000604(GPNMB),ENSBTAG00000000608(PRCC),ENSBTAG00000000650(TUBGCP6),ENSBTAG00000…
BP	GO:0032880	regulation of protein localization	1e-16	8.34807e-15	ENSBTAG00000000013(PRKAA1),ENSBTAG00000000031(TRPV4),ENSBTAG00000000095(CD274),ENSBTAG00000000205(MMD),ENSBTAG00000000231(BMPR1A),ENSBTAG00000000257(MRAP2),ENSBTAG00000000259(CHIA),ENSBTAG00000000264(RFX6),ENSBTAG00000000286(PFKM),ENSBTAG00000000292(TCIRG1),ENSBTAG00000000322(CD2AP),ENSBTAG00000000347(RHOG),ENSBTAG00000000436(TNFAIP3),ENSBTAG00000000437(FFAR4),ENSBTAG00000000442(RBP4),ENSBTAG0000…
BP	GO:0051345	positive regulation of hydrolase activity	1.1e-16	9.10472e-15	ENSBTAG00000000147(RIC8B),ENSBTAG00000000152(RANBP2),ENSBTAG00000000210(ARHGAP31),ENSBTAG00000000306(ITK),ENSBTAG00000000333(ARHGAP20),ENSBTAG00000000347(RHOG),ENSBTAG00000000428(BAK1),ENSBTAG00000000571(ARHGAP27),ENSBTAG00000000713(AGFG2),ENSBTAG00000000738(DAPK1),ENSBTAG00000000778(HSP90AB1),ENSBTAG00000000815(EPHA2),ENSBTAG00000000833(TAX1BP3),ENSBTAG00000000942(SIPA1L2),ENSBTAG00000000949(DNA…
BP	GO:0071495	cellular response to endogenous stimulus	1.1e-16	9.10472e-15	ENSBTAG00000000013(PRKAA1),ENSBTAG00000000113(ARHGEF2),ENSBTAG00000000128(FGF18),ENSBTAG00000000163(DDIT4),ENSBTAG00000000215(GNB1),ENSBTAG00000000231(BMPR1A),ENSBTAG00000000438(GNRHR),ENSBTAG00000000483(HYAL1),ENSBTAG00000000484(HYAL2),ENSBTAG00000000494(PDE4D),ENSBTAG00000000507(NR4A1),ENSBTAG00000000541(NKX2-1),ENSBTAG00000000546(TOB1),ENSBTAG00000000569(HES1),ENSBTAG00000000602(RXRB),ENSBTAG0…
MF	GO:0032555	purine ribonucleotide binding	1.2e-16	9.80723e-15	ENSBTAG00000000005(GRK3),ENSBTAG00000000013(PRKAA1),ENSBTAG00000000025(RAB6A),ENSBTAG00000000056(STRADA),ENSBTAG00000000062(RASL12),ENSBTAG00000000105(RIT1),ENSBTAG00000000132(EIF4A1),ENSBTAG00000000184(EIF2AK3),ENSBTAG00000000218(MAP2K5),ENSBTAG00000000220(NEK10),ENSBTAG00000000231(BMPR1A),ENSBTAG00000000279(RAB26),ENSBTAG00000000285(GUF1),ENSBTAG00000000286(PFKM),ENSBTAG00000000306(ITK),ENSBTAG…
MF	GO:0017076	purine nucleotide binding	1.2e-16	9.80723e-15	ENSBTAG00000000005(GRK3),ENSBTAG00000000013(PRKAA1),ENSBTAG00000000025(RAB6A),ENSBTAG00000000056(STRADA),ENSBTAG00000000062(RASL12),ENSBTAG00000000105(RIT1),ENSBTAG00000000132(EIF4A1),ENSBTAG00000000184(EIF2AK3),ENSBTAG00000000218(MAP2K5),ENSBTAG00000000220(NEK10),ENSBTAG00000000231(BMPR1A),ENSBTAG00000000279(RAB26),ENSBTAG00000000285(GUF1),ENSBTAG00000000286(PFKM),ENSBTAG00000000306(ITK),ENSBTAG…
CC	GO:0098791	Golgi subcompartment	1.2e-16	9.80723e-15	ENSBTAG00000000025(RAB6A),ENSBTAG00000000078(GLIPR2),ENSBTAG00000000090(SEC31B),ENSBTAG00000000274(YKT6),ENSBTAG00000000279(RAB26),ENSBTAG00000000342(PLOD3),ENSBTAG00000000379(GOLT1B),ENSBTAG00000000390(TPST1),ENSBTAG00000000414(FUT6),ENSBTAG00000000511(CNST),ENSBTAG00000000564(NSG2),ENSBTAG00000000676(DOP1A),ENSBTAG00000000703(ST6GAL2),ENSBTAG00000000795(NMNAT2),ENSBTAG00000000799(ICA1),ENSBTAG0…
BP	GO:0010562	positive regulation of phosphorus metabolic process	1.3e-16	1.0536e-14	ENSBTAG00000000031(TRPV4),ENSBTAG00000000056(STRADA),ENSBTAG00000000078(GLIPR2),ENSBTAG00000000113(ARHGEF2),ENSBTAG00000000128(FGF18),ENSBTAG00000000152(RANBP2),ENSBTAG00000000205(MMD),ENSBTAG00000000218(MAP2K5),ENSBTAG00000000231(BMPR1A),ENSBTAG00000000283(CSF1),ENSBTAG00000000305(LMO4),ENSBTAG00000000317(MAPK8IP1),ENSBTAG00000000354(PDE6G),ENSBTAG00000000437(FFAR4),ENSBTAG00000000469(PPP2CA),EN…
BP	GO:0045937	positive regulation of phosphate metabolic process	1.3e-16	1.0536e-14	ENSBTAG00000000031(TRPV4),ENSBTAG00000000056(STRADA),ENSBTAG00000000078(GLIPR2),ENSBTAG00000000113(ARHGEF2),ENSBTAG00000000128(FGF18),ENSBTAG00000000152(RANBP2),ENSBTAG00000000205(MMD),ENSBTAG00000000218(MAP2K5),ENSBTAG00000000231(BMPR1A),ENSBTAG00000000283(CSF1),ENSBTAG00000000305(LMO4),ENSBTAG00000000317(MAPK8IP1),ENSBTAG00000000354(PDE6G),ENSBTAG00000000437(FFAR4),ENSBTAG00000000469(PPP2CA),EN…
BP	GO:1901701	cellular response to oxygen-containing compound	1.4e-16	1.12526e-14	ENSBTAG00000000013(PRKAA1),ENSBTAG00000000042(PYCR1),ENSBTAG00000000095(CD274),ENSBTAG00000000113(ARHGEF2),ENSBTAG00000000163(DDIT4),ENSBTAG00000000215(GNB1),ENSBTAG00000000264(RFX6),ENSBTAG00000000396(PIM1),ENSBTAG00000000436(TNFAIP3),ENSBTAG00000000438(GNRHR),ENSBTAG00000000494(PDE4D),ENSBTAG00000000507(NR4A1),ENSBTAG00000000540(RNF112),ENSBTAG00000000563(MYD88),ENSBTAG00000000570(RET),ENSBTAG0…
BP	GO:0006357	regulation of transcription from RNA polymerase II promoter	1.4e-16	1.12526e-14	ENSBTAG00000000009(FOXF1),ENSBTAG00000000023(RNF2),ENSBTAG00000000031(TRPV4),ENSBTAG00000000039(SIRT7),ENSBTAG00000000040(MAFG),ENSBTAG00000000074(NFIA),ENSBTAG00000000092(HIF1AN),ENSBTAG00000000113(ARHGEF2),ENSBTAG00000000222(ARID4B),ENSBTAG00000000231(BMPR1A),ENSBTAG00000000264(RFX6),ENSBTAG00000000305(LMO4),ENSBTAG00000000332(ERF),ENSBTAG00000000382(MED27),ENSBTAG00000000385(ZBTB18),ENSBTAG000…
BP	GO:0007010	cytoskeleton organization	1.6e-16	1.28072e-14	ENSBTAG00000000013(PRKAA1),ENSBTAG00000000021(WASHC3),ENSBTAG00000000031(TRPV4),ENSBTAG00000000113(ARHGEF2),ENSBTAG00000000322(CD2AP),ENSBTAG00000000347(RHOG),ENSBTAG00000000369(EPS8),ENSBTAG00000000436(TNFAIP3),ENSBTAG00000000458(DYNC1LI2),ENSBTAG00000000490(RTKN),ENSBTAG00000000619(KRT74),ENSBTAG00000000650(TUBGCP6),ENSBTAG00000000684(ARHGEF10L),ENSBTAG00000000700(PARVA),ENSBTAG00000000742(AMOT…
BP	GO:0006886	intracellular protein transport	2.2e-16	1.74662e-14	ENSBTAG00000000013(PRKAA1),ENSBTAG00000000025(RAB6A),ENSBTAG00000000026(VPS33B),ENSBTAG00000000056(STRADA),ENSBTAG00000000090(SEC31B),ENSBTAG00000000152(RANBP2),ENSBTAG00000000231(BMPR1A),ENSBTAG00000000279(RAB26),ENSBTAG00000000411(HGS),ENSBTAG00000000415(ERBIN),ENSBTAG00000000460(SYTL2),ENSBTAG00000000475(IMMP1L),ENSBTAG00000000484(HYAL2),ENSBTAG00000000546(TOB1),ENSBTAG00000000562(TOMM20),ENSB…
BP	GO:0034097	response to cytokine	2.2e-16	1.74662e-14	ENSBTAG00000000009(FOXF1),ENSBTAG00000000095(CD274),ENSBTAG00000000102(GPR75),ENSBTAG00000000251(ALAD),ENSBTAG00000000273(IL5RA),ENSBTAG00000000283(CSF1),ENSBTAG00000000292(TCIRG1),ENSBTAG00000000369(EPS8),ENSBTAG00000000415(ERBIN),ENSBTAG00000000476(THPO),ENSBTAG00000000483(HYAL1),ENSBTAG00000000484(HYAL2),ENSBTAG00000000630(LSM14A),ENSBTAG00000000696(ILK),ENSBTAG00000000738(DAPK1),ENSBTAG000000…
BP	GO:0022402	cell cycle process	2.5e-16	1.97673e-14	ENSBTAG00000000039(SIRT7),ENSBTAG00000000064(FEN1),ENSBTAG00000000113(ARHGEF2),ENSBTAG00000000169(ASZ1),ENSBTAG00000000281(MND1),ENSBTAG00000000369(EPS8),ENSBTAG00000000372(TIPIN),ENSBTAG00000000483(HYAL1),ENSBTAG00000000490(RTKN),ENSBTAG00000000500(PINX1),ENSBTAG00000000501(KLHL13),ENSBTAG00000000502(DAZL),ENSBTAG00000000540(RNF112),ENSBTAG00000000579(NIPBL),ENSBTAG00000000590(POLE),ENSBTAG00000…
MF	GO:0016773	phosphotransferase activity, alcohol group as acceptor	2.6e-16	2.03922e-14	ENSBTAG00000000005(GRK3),ENSBTAG00000000013(PRKAA1),ENSBTAG00000000056(STRADA),ENSBTAG00000000184(EIF2AK3),ENSBTAG00000000205(MMD),ENSBTAG00000000212(NADK),ENSBTAG00000000218(MAP2K5),ENSBTAG00000000220(NEK10),ENSBTAG00000000231(BMPR1A),ENSBTAG00000000286(PFKM),ENSBTAG00000000301,ENSBTAG00000000306(ITK),ENSBTAG00000000357(PRAG1),ENSBTAG00000000377(BMX),ENSBTAG00000000396(PIM1),ENSBTAG00000000570(R…
CC	GO:0042995	cell projection	2.6e-16	2.03922e-14	ENSBTAG00000000013(PRKAA1),ENSBTAG00000000031(TRPV4),ENSBTAG00000000032(ABI3),ENSBTAG00000000088(ALCAM),ENSBTAG00000000109(NPTXR),ENSBTAG00000000113(ARHGEF2),ENSBTAG00000000153(LRFN3),ENSBTAG00000000210(ARHGAP31),ENSBTAG00000000215(GNB1),ENSBTAG00000000241(STAU1),ENSBTAG00000000253(PTPRF),ENSBTAG00000000271(MNS1),ENSBTAG00000000286(PFKM),ENSBTAG00000000317(MAPK8IP1),ENSBTAG00000000322(CD2AP),ENSB…
BP	GO:0032446	protein modification by small protein conjugation	2.7e-16	2.10914e-14	ENSBTAG00000000023(RNF2),ENSBTAG00000000152(RANBP2),ENSBTAG00000000162(ANAPC16),ENSBTAG00000000201(LTN1),ENSBTAG00000000260(ZNRF2),ENSBTAG00000000289(ASB8),ENSBTAG00000000436(TNFAIP3),ENSBTAG00000000500(PINX1),ENSBTAG00000000501(KLHL13),ENSBTAG00000000540(RNF112),ENSBTAG00000000753(PIAS4),ENSBTAG00000000778(HSP90AB1),ENSBTAG00000000855(NXN),ENSBTAG00000000856(FBXL6),ENSBTAG00000000871(TRIM27),ENS…
BP	GO:0031401	positive regulation of protein modification process	2.9e-16	2.25632e-14	ENSBTAG00000000013(PRKAA1),ENSBTAG00000000031(TRPV4),ENSBTAG00000000056(STRADA),ENSBTAG00000000078(GLIPR2),ENSBTAG00000000113(ARHGEF2),ENSBTAG00000000128(FGF18),ENSBTAG00000000205(MMD),ENSBTAG00000000218(MAP2K5),ENSBTAG00000000231(BMPR1A),ENSBTAG00000000283(CSF1),ENSBTAG00000000317(MAPK8IP1),ENSBTAG00000000354(PDE6G),ENSBTAG00000000437(FFAR4),ENSBTAG00000000469(PPP2CA),ENSBTAG00000000476(THPO),EN…
BP	GO:0007399	nervous system development	3.3e-16	2.5573e-14	ENSBTAG00000000056(STRADA),ENSBTAG00000000074(NFIA),ENSBTAG00000000088(ALCAM),ENSBTAG00000000109(NPTXR),ENSBTAG00000000113(ARHGEF2),ENSBTAG00000000137(FRYL),ENSBTAG00000000163(DDIT4),ENSBTAG00000000164(GNRH1),ENSBTAG00000000182(SPINT2),ENSBTAG00000000205(MMD),ENSBTAG00000000231(BMPR1A),ENSBTAG00000000253(PTPRF),ENSBTAG00000000266(NAB1),ENSBTAG00000000283(CSF1),ENSBTAG00000000292(TCIRG1),ENSBTAG00…
MF	GO:0035639	purine ribonucleoside triphosphate binding	3.6e-16	2.77871e-14	ENSBTAG00000000005(GRK3),ENSBTAG00000000013(PRKAA1),ENSBTAG00000000025(RAB6A),ENSBTAG00000000056(STRADA),ENSBTAG00000000062(RASL12),ENSBTAG00000000105(RIT1),ENSBTAG00000000132(EIF4A1),ENSBTAG00000000184(EIF2AK3),ENSBTAG00000000218(MAP2K5),ENSBTAG00000000220(NEK10),ENSBTAG00000000231(BMPR1A),ENSBTAG00000000279(RAB26),ENSBTAG00000000285(GUF1),ENSBTAG00000000286(PFKM),ENSBTAG00000000306(ITK),ENSBTAG…
CC	GO:0005739	mitochondrion	3.8e-16	2.92149e-14	ENSBTAG00000000011(TDH),ENSBTAG00000000014(TXN2),ENSBTAG00000000042(PYCR1),ENSBTAG00000000064(FEN1),ENSBTAG00000000065(CRLS1),ENSBTAG00000000072(TFB2M),ENSBTAG00000000081(COL4A3BP),ENSBTAG00000000091(NDUFB8),ENSBTAG00000000094(ATPAF1),ENSBTAG00000000103(MRPL23),ENSBTAG00000000141(NFU1),ENSBTAG00000000152(RANBP2),ENSBTAG00000000163(DDIT4),ENSBTAG00000000191(SLC25A20),ENSBTAG00000000199(PDP1),ENSBT…
BP	GO:0032269	negative regulation of cellular protein metabolic process	4.2e-16	3.21631e-14	ENSBTAG00000000013(PRKAA1),ENSBTAG00000000076(RECK),ENSBTAG00000000163(DDIT4),ENSBTAG00000000182(SPINT2),ENSBTAG00000000251(ALAD),ENSBTAG00000000399(NANOS3),ENSBTAG00000000428(BAK1),ENSBTAG00000000435(TARBP2),ENSBTAG00000000436(TNFAIP3),ENSBTAG00000000484(HYAL2),ENSBTAG00000000494(PDE4D),ENSBTAG00000000500(PINX1),ENSBTAG00000000507(NR4A1),ENSBTAG00000000512(SNTA1),ENSBTAG00000000522(AHSG),ENSBTAG…
BP	GO:0070647	protein modification by small protein conjugation or removal	5.4e-16	4.11904e-14	ENSBTAG00000000023(RNF2),ENSBTAG00000000120(USP43),ENSBTAG00000000131(SENP3),ENSBTAG00000000149(USP40),ENSBTAG00000000152(RANBP2),ENSBTAG00000000162(ANAPC16),ENSBTAG00000000201(LTN1),ENSBTAG00000000260(ZNRF2),ENSBTAG00000000289(ASB8),ENSBTAG00000000436(TNFAIP3),ENSBTAG00000000500(PINX1),ENSBTAG00000000501(KLHL13),ENSBTAG00000000540(RNF112),ENSBTAG00000000694(TAF10),ENSBTAG00000000725(USP42),ENSBT…
BP	GO:1903047	mitotic cell cycle process	5.8e-16	4.40687e-14	ENSBTAG00000000039(SIRT7),ENSBTAG00000000113(ARHGEF2),ENSBTAG00000000369(EPS8),ENSBTAG00000000372(TIPIN),ENSBTAG00000000483(HYAL1),ENSBTAG00000000490(RTKN),ENSBTAG00000000500(PINX1),ENSBTAG00000000579(NIPBL),ENSBTAG00000000590(POLE),ENSBTAG00000000599(CCNI),ENSBTAG00000000604(GPNMB),ENSBTAG00000000608(PRCC),ENSBTAG00000000694(TAF10),ENSBTAG00000000706(ADAMTS1),ENSBTAG00000000752(SGO1),ENSBTAG0000…
BP	GO:0022610	biological adhesion	6.5e-16	4.91951e-14	ENSBTAG00000000009(FOXF1),ENSBTAG00000000026(VPS33B),ENSBTAG00000000031(TRPV4),ENSBTAG00000000057(THBS3),ENSBTAG00000000061(PCDH7),ENSBTAG00000000087(HSD17B12),ENSBTAG00000000088(ALCAM),ENSBTAG00000000095(CD274),ENSBTAG00000000153(LRFN3),ENSBTAG00000000177(MSLN),ENSBTAG00000000182(SPINT2),ENSBTAG00000000253(PTPRF),ENSBTAG00000000283(CSF1),ENSBTAG00000000317(MAPK8IP1),ENSBTAG00000000329(MEGF10),EN…
BP	GO:0009057	macromolecule catabolic process	6.9e-16	5.18193e-14	ENSBTAG00000000010(UBL7),ENSBTAG00000000064(FEN1),ENSBTAG00000000067(SDF2L1),ENSBTAG00000000120(USP43),ENSBTAG00000000149(USP40),ENSBTAG00000000201(LTN1),ENSBTAG00000000251(ALAD),ENSBTAG00000000259(CHIA),ENSBTAG00000000267(SMG6),ENSBTAG00000000279(RAB26),ENSBTAG00000000286(PFKM),ENSBTAG00000000288(UPF2),ENSBTAG00000000292(TCIRG1),ENSBTAG00000000320(UBAP1),ENSBTAG00000000371(DIS3L),ENSBTAG00000000…
BP	GO:0006974	cellular response to DNA damage stimulus	6.9e-16	5.18193e-14	ENSBTAG00000000064(FEN1),ENSBTAG00000000163(DDIT4),ENSBTAG00000000225(POLB),ENSBTAG00000000252(POLE3),ENSBTAG00000000365(TDP2),ENSBTAG00000000372(TIPIN),ENSBTAG00000000375(SSRP1),ENSBTAG00000000385(ZBTB18),ENSBTAG00000000428(BAK1),ENSBTAG00000000532(EXO5),ENSBTAG00000000579(NIPBL),ENSBTAG00000000590(POLE),ENSBTAG00000000629(MMS22L),ENSBTAG00000000632(RAD54B),ENSBTAG00000000711(NDRG1),ENSBTAG00000…
BP	GO:0048468	cell development	8.5e-16	6.35898e-14	ENSBTAG00000000023(RNF2),ENSBTAG00000000026(VPS33B),ENSBTAG00000000056(STRADA),ENSBTAG00000000076(RECK),ENSBTAG00000000088(ALCAM),ENSBTAG00000000109(NPTXR),ENSBTAG00000000113(ARHGEF2),ENSBTAG00000000124(DHH),ENSBTAG00000000128(FGF18),ENSBTAG00000000137(FRYL),ENSBTAG00000000164(GNRH1),ENSBTAG00000000182(SPINT2),ENSBTAG00000000205(MMD),ENSBTAG00000000222(ARID4B),ENSBTAG00000000231(BMPR1A),ENSBTAG00…
BP	GO:0016567	protein ubiquitination	9.1e-16	6.78177e-14	ENSBTAG00000000023(RNF2),ENSBTAG00000000162(ANAPC16),ENSBTAG00000000201(LTN1),ENSBTAG00000000260(ZNRF2),ENSBTAG00000000289(ASB8),ENSBTAG00000000436(TNFAIP3),ENSBTAG00000000500(PINX1),ENSBTAG00000000501(KLHL13),ENSBTAG00000000540(RNF112),ENSBTAG00000000778(HSP90AB1),ENSBTAG00000000855(NXN),ENSBTAG00000000856(FBXL6),ENSBTAG00000000871(TRIM27),ENSBTAG00000000902(OGT),ENSBTAG00000000911(UBE2H),ENSBTA…
BP	GO:0033365	protein localization to organelle	9.3e-16	6.90436e-14	ENSBTAG00000000013(PRKAA1),ENSBTAG00000000025(RAB6A),ENSBTAG00000000152(RANBP2),ENSBTAG00000000231(BMPR1A),ENSBTAG00000000322(CD2AP),ENSBTAG00000000411(HGS),ENSBTAG00000000436(TNFAIP3),ENSBTAG00000000475(IMMP1L),ENSBTAG00000000484(HYAL2),ENSBTAG00000000490(RTKN),ENSBTAG00000000500(PINX1),ENSBTAG00000000546(TOB1),ENSBTAG00000000562(TOMM20),ENSBTAG00000000566(CCDC14),ENSBTAG00000000579(NIPBL),ENSBT…
BP	GO:0043549	regulation of kinase activity	9.4e-16	6.95207e-14	ENSBTAG00000000056(STRADA),ENSBTAG00000000128(FGF18),ENSBTAG00000000152(RANBP2),ENSBTAG00000000205(MMD),ENSBTAG00000000218(MAP2K5),ENSBTAG00000000283(CSF1),ENSBTAG00000000305(LMO4),ENSBTAG00000000354(PDE6G),ENSBTAG00000000411(HGS),ENSBTAG00000000436(TNFAIP3),ENSBTAG00000000469(PPP2CA),ENSBTAG00000000484(HYAL2),ENSBTAG00000000570(RET),ENSBTAG00000000599(CCNI),ENSBTAG00000000730(GCG),ENSBTAG0000000…
BP	GO:0007155	cell adhesion	1e-15	7.3678e-14	ENSBTAG00000000009(FOXF1),ENSBTAG00000000026(VPS33B),ENSBTAG00000000031(TRPV4),ENSBTAG00000000057(THBS3),ENSBTAG00000000061(PCDH7),ENSBTAG00000000087(HSD17B12),ENSBTAG00000000088(ALCAM),ENSBTAG00000000095(CD274),ENSBTAG00000000153(LRFN3),ENSBTAG00000000177(MSLN),ENSBTAG00000000182(SPINT2),ENSBTAG00000000253(PTPRF),ENSBTAG00000000283(CSF1),ENSBTAG00000000317(MAPK8IP1),ENSBTAG00000000329(MEGF10),EN…
BP	GO:0008610	lipid biosynthetic process	1.5e-15	1.09686e-13	ENSBTAG00000000013(PRKAA1),ENSBTAG00000000019(SERINC1),ENSBTAG00000000065(CRLS1),ENSBTAG00000000099(CERS2),ENSBTAG00000000124(DHH),ENSBTAG00000000675(PGS1),ENSBTAG00000000730(GCG),ENSBTAG00000000944(LPCAT1),ENSBTAG00000001035(SF1),ENSBTAG00000001246(ATP1A1),ENSBTAG00000001299(CYP7B1),ENSBTAG00000001321(IL1B),ENSBTAG00000001417(ACSM1),ENSBTAG00000001592(INSIG1),ENSBTAG00000001727(PRXL2B),ENSBTAG00…
BP	GO:0044265	cellular macromolecule catabolic process	1.5e-15	1.09686e-13	ENSBTAG00000000010(UBL7),ENSBTAG00000000064(FEN1),ENSBTAG00000000067(SDF2L1),ENSBTAG00000000120(USP43),ENSBTAG00000000149(USP40),ENSBTAG00000000201(LTN1),ENSBTAG00000000251(ALAD),ENSBTAG00000000267(SMG6),ENSBTAG00000000288(UPF2),ENSBTAG00000000292(TCIRG1),ENSBTAG00000000320(UBAP1),ENSBTAG00000000371(DIS3L),ENSBTAG00000000399(NANOS3),ENSBTAG00000000436(TNFAIP3),ENSBTAG00000000502(DAZL),ENSBTAG0000…
MF	GO:0005102	receptor binding	1.6e-15	1.16125e-13	ENSBTAG00000000016(LTA),ENSBTAG00000000027(IGFL1),ENSBTAG00000000073(LRPAP1),ENSBTAG00000000092(HIF1AN),ENSBTAG00000000123(HAO2),ENSBTAG00000000124(DHH),ENSBTAG00000000128(FGF18),ENSBTAG00000000130(TNFSF13),ENSBTAG00000000164(GNRH1),ENSBTAG00000000257(MRAP2),ENSBTAG00000000283(CSF1),ENSBTAG00000000329(MEGF10),ENSBTAG00000000413(NRTN),ENSBTAG00000000415(ERBIN),ENSBTAG00000000460(SYTL2),ENSBTAG0000…
CC	GO:0030054	cell junction	1.6e-15	1.16125e-13	ENSBTAG00000000031(TRPV4),ENSBTAG00000000074(NFIA),ENSBTAG00000000153(LRFN3),ENSBTAG00000000306(ITK),ENSBTAG00000000322(CD2AP),ENSBTAG00000000345(CLDN15),ENSBTAG00000000357(PRAG1),ENSBTAG00000000415(ERBIN),ENSBTAG00000000512(SNTA1),ENSBTAG00000000540(RNF112),ENSBTAG00000000561(OCLN),ENSBTAG00000000696(ILK),ENSBTAG00000000700(PARVA),ENSBTAG00000000711(NDRG1),ENSBTAG00000000742(AMOTL2),ENSBTAG00000…
BP	GO:0006366	transcription from RNA polymerase II promoter	1.7e-15	1.22925e-13	ENSBTAG00000000009(FOXF1),ENSBTAG00000000023(RNF2),ENSBTAG00000000031(TRPV4),ENSBTAG00000000039(SIRT7),ENSBTAG00000000040(MAFG),ENSBTAG00000000054(SNAPC4),ENSBTAG00000000074(NFIA),ENSBTAG00000000092(HIF1AN),ENSBTAG00000000113(ARHGEF2),ENSBTAG00000000222(ARID4B),ENSBTAG00000000231(BMPR1A),ENSBTAG00000000264(RFX6),ENSBTAG00000000305(LMO4),ENSBTAG00000000332(ERF),ENSBTAG00000000382(MED27),ENSBTAG000…
CC	GO:0005773	vacuole	1.8e-15	1.29673e-13	ENSBTAG00000000026(VPS33B),ENSBTAG00000000133(CD68),ENSBTAG00000000203(ATP6V1G1),ENSBTAG00000000292(TCIRG1),ENSBTAG00000000344(SPACA3),ENSBTAG00000000411(HGS),ENSBTAG00000000483(HYAL1),ENSBTAG00000000484(HYAL2),ENSBTAG00000000564(NSG2),ENSBTAG00000000704(GUSB),ENSBTAG00000000720(CTSL),ENSBTAG00000000831(CTNS),ENSBTAG00000000878(RB1CC1),ENSBTAG00000001008(PRF1),ENSBTAG00000001060(CXCR4),ENSBTAG000…
BP	GO:0023014	signal transduction by protein phosphorylation	2.2e-15	1.57905e-13	ENSBTAG00000000031(TRPV4),ENSBTAG00000000056(STRADA),ENSBTAG00000000078(GLIPR2),ENSBTAG00000000128(FGF18),ENSBTAG00000000218(MAP2K5),ENSBTAG00000000317(MAPK8IP1),ENSBTAG00000000354(PDE6G),ENSBTAG00000000411(HGS),ENSBTAG00000000437(FFAR4),ENSBTAG00000000476(THPO),ENSBTAG00000000484(HYAL2),ENSBTAG00000000548(KLHDC10),ENSBTAG00000000563(MYD88),ENSBTAG00000000570(RET),ENSBTAG00000000604(GPNMB),ENSBTA…
CC	GO:1902494	catalytic complex	2.5e-15	1.78778e-13	ENSBTAG00000000013(PRKAA1),ENSBTAG00000000023(RNF2),ENSBTAG00000000037(CWC27),ENSBTAG00000000091(NDUFB8),ENSBTAG00000000131(SENP3),ENSBTAG00000000162(ANAPC16),ENSBTAG00000000215(GNB1),ENSBTAG00000000252(POLE3),ENSBTAG00000000286(PFKM),ENSBTAG00000000291(DHTKD1),ENSBTAG00000000343(ZNHIT1),ENSBTAG00000000371(DIS3L),ENSBTAG00000000409(CDC40),ENSBTAG00000000435(TARBP2),ENSBTAG00000000458(DYNC1LI2),EN…
CC	GO:0045202	synapse	2.7e-15	1.92373e-13	ENSBTAG00000000113(ARHGEF2),ENSBTAG00000000153(LRFN3),ENSBTAG00000000240(AKAP7),ENSBTAG00000000265(SYNPR),ENSBTAG00000000279(RAB26),ENSBTAG00000000317(MAPK8IP1),ENSBTAG00000000369(EPS8),ENSBTAG00000000392(ASCC1),ENSBTAG00000000415(ERBIN),ENSBTAG00000000469(PPP2CA),ENSBTAG00000000497(AKR1A1),ENSBTAG00000000512(SNTA1),ENSBTAG00000000520(ATP2B3),ENSBTAG00000000534(PNOC),ENSBTAG00000000540(RNF112),EN…
BP	GO:0051726	regulation of cell cycle	3e-15	2.12967e-13	ENSBTAG00000000064(FEN1),ENSBTAG00000000372(TIPIN),ENSBTAG00000000399(NANOS3),ENSBTAG00000000428(BAK1),ENSBTAG00000000436(TNFAIP3),ENSBTAG00000000483(HYAL1),ENSBTAG00000000500(PINX1),ENSBTAG00000000501(KLHL13),ENSBTAG00000000502(DAZL),ENSBTAG00000000507(NR4A1),ENSBTAG00000000540(RNF112),ENSBTAG00000000569(HES1),ENSBTAG00000000579(NIPBL),ENSBTAG00000000599(CCNI),ENSBTAG00000000604(GPNMB),ENSBTAG00…
BP	GO:0010468	regulation of gene expression	4.2e-15	2.9707e-13	ENSBTAG00000000009(FOXF1),ENSBTAG00000000013(PRKAA1),ENSBTAG00000000023(RNF2),ENSBTAG00000000031(TRPV4),ENSBTAG00000000039(SIRT7),ENSBTAG00000000040(MAFG),ENSBTAG00000000072(TFB2M),ENSBTAG00000000074(NFIA),ENSBTAG00000000085(CYP1A2),ENSBTAG00000000092(HIF1AN),ENSBTAG00000000098(SETDB1),ENSBTAG00000000113(ARHGEF2),ENSBTAG00000000164(GNRH1),ENSBTAG00000000169(ASZ1),ENSBTAG00000000184(EIF2AK3),ENSBT…
BP	GO:0043436	oxoacid metabolic process	4.6e-15	3.24183e-13	ENSBTAG00000000011(TDH),ENSBTAG00000000013(PRKAA1),ENSBTAG00000000042(PYCR1),ENSBTAG00000000085(CYP1A2),ENSBTAG00000000123(HAO2),ENSBTAG00000000160(CBS),ENSBTAG00000000163(DDIT4),ENSBTAG00000000188(HS3ST5),ENSBTAG00000000246(ME3),ENSBTAG00000000286(PFKM),ENSBTAG00000000287(GNPDA2),ENSBTAG00000000291(DHTKD1),ENSBTAG00000000342(PLOD3),ENSBTAG00000000483(HYAL1),ENSBTAG00000000484(HYAL2),ENSBTAG00000…
BP	GO:0045944	positive regulation of transcription from RNA polymerase II promoter	4.9e-15	3.44079e-13	ENSBTAG00000000009(FOXF1),ENSBTAG00000000040(MAFG),ENSBTAG00000000074(NFIA),ENSBTAG00000000113(ARHGEF2),ENSBTAG00000000222(ARID4B),ENSBTAG00000000231(BMPR1A),ENSBTAG00000000264(RFX6),ENSBTAG00000000305(LMO4),ENSBTAG00000000385(ZBTB18),ENSBTAG00000000484(HYAL2),ENSBTAG00000000504(GTF2B),ENSBTAG00000000507(NR4A1),ENSBTAG00000000541(NKX2-1),ENSBTAG00000000558(NEUROD6),ENSBTAG00000000569(HES1),ENSBTA…
CC	GO:0000139	Golgi membrane	6e-15	4.19806e-13	ENSBTAG00000000025(RAB6A),ENSBTAG00000000078(GLIPR2),ENSBTAG00000000090(SEC31B),ENSBTAG00000000274(YKT6),ENSBTAG00000000279(RAB26),ENSBTAG00000000379(GOLT1B),ENSBTAG00000000390(TPST1),ENSBTAG00000000414(FUT6),ENSBTAG00000000564(NSG2),ENSBTAG00000000703(ST6GAL2),ENSBTAG00000000795(NMNAT2),ENSBTAG00000000799(ICA1),ENSBTAG00000000810(COPE),ENSBTAG00000000854(SEC16B),ENSBTAG00000000905(RAB6B),ENSBTAG…
BP	GO:0002520	immune system development	6.8e-15	4.74075e-13	ENSBTAG00000000016(LTA),ENSBTAG00000000026(VPS33B),ENSBTAG00000000095(CD274),ENSBTAG00000000130(TNFSF13),ENSBTAG00000000225(POLB),ENSBTAG00000000283(CSF1),ENSBTAG00000000291(DHTKD1),ENSBTAG00000000292(TCIRG1),ENSBTAG00000000305(LMO4),ENSBTAG00000000306(ITK),ENSBTAG00000000396(PIM1),ENSBTAG00000000428(BAK1),ENSBTAG00000000436(TNFAIP3),ENSBTAG00000000476(THPO),ENSBTAG00000000484(HYAL2),ENSBTAG00000…
BP	GO:0006082	organic acid metabolic process	7.1e-15	4.93222e-13	ENSBTAG00000000011(TDH),ENSBTAG00000000013(PRKAA1),ENSBTAG00000000042(PYCR1),ENSBTAG00000000085(CYP1A2),ENSBTAG00000000123(HAO2),ENSBTAG00000000160(CBS),ENSBTAG00000000163(DDIT4),ENSBTAG00000000188(HS3ST5),ENSBTAG00000000246(ME3),ENSBTAG00000000286(PFKM),ENSBTAG00000000287(GNPDA2),ENSBTAG00000000291(DHTKD1),ENSBTAG00000000342(PLOD3),ENSBTAG00000000483(HYAL1),ENSBTAG00000000484(HYAL2),ENSBTAG00000…
BP	GO:0009894	regulation of catabolic process	7.5e-15	5.19155e-13	ENSBTAG00000000013(PRKAA1),ENSBTAG00000000163(DDIT4),ENSBTAG00000000251(ALAD),ENSBTAG00000000267(SMG6),ENSBTAG00000000279(RAB26),ENSBTAG00000000399(NANOS3),ENSBTAG00000000436(TNFAIP3),ENSBTAG00000000502(DAZL),ENSBTAG00000000546(TOB1),ENSBTAG00000000613(ELAVL1),ENSBTAG00000000660(FAM83D),ENSBTAG00000000738(DAPK1),ENSBTAG00000000764(GIPC1),ENSBTAG00000000778(HSP90AB1),ENSBTAG00000000782(KDR),ENSBTA…
BP	GO:0097190	apoptotic signaling pathway	8.7e-15	6.00084e-13	ENSBTAG00000000163(DDIT4),ENSBTAG00000000184(EIF2AK3),ENSBTAG00000000225(POLB),ENSBTAG00000000312(GRINA),ENSBTAG00000000317(MAPK8IP1),ENSBTAG00000000399(NANOS3),ENSBTAG00000000428(BAK1),ENSBTAG00000000436(TNFAIP3),ENSBTAG00000000484(HYAL2),ENSBTAG00000000640(SELENOS),ENSBTAG00000000697(RRP8),ENSBTAG00000000735(BCL2A1),ENSBTAG00000000738(DAPK1),ENSBTAG00000000753(PIAS4),ENSBTAG00000000815(EPHA2),E…
BP	GO:0031400	negative regulation of protein modification process	9.4e-15	6.46076e-13	ENSBTAG00000000013(PRKAA1),ENSBTAG00000000163(DDIT4),ENSBTAG00000000428(BAK1),ENSBTAG00000000436(TNFAIP3),ENSBTAG00000000484(HYAL2),ENSBTAG00000000494(PDE4D),ENSBTAG00000000500(PINX1),ENSBTAG00000000512(SNTA1),ENSBTAG00000000625(SMAD6),ENSBTAG00000000653(PPP1R16B),ENSBTAG00000000746(KAT2B),ENSBTAG00000000842(UBASH3B),ENSBTAG00000000843(NDRG2),ENSBTAG00000000855(NXN),ENSBTAG00000000871(TRIM27),ENS…
BP	GO:0000165	MAPK cascade	9.5e-15	6.5065e-13	ENSBTAG00000000031(TRPV4),ENSBTAG00000000056(STRADA),ENSBTAG00000000078(GLIPR2),ENSBTAG00000000128(FGF18),ENSBTAG00000000218(MAP2K5),ENSBTAG00000000317(MAPK8IP1),ENSBTAG00000000354(PDE6G),ENSBTAG00000000411(HGS),ENSBTAG00000000437(FFAR4),ENSBTAG00000000476(THPO),ENSBTAG00000000484(HYAL2),ENSBTAG00000000548(KLHDC10),ENSBTAG00000000563(MYD88),ENSBTAG00000000570(RET),ENSBTAG00000000604(GPNMB),ENSBTA…
BP	GO:0043408	regulation of MAPK cascade	9.9e-15	6.75666e-13	ENSBTAG00000000031(TRPV4),ENSBTAG00000000078(GLIPR2),ENSBTAG00000000128(FGF18),ENSBTAG00000000218(MAP2K5),ENSBTAG00000000317(MAPK8IP1),ENSBTAG00000000354(PDE6G),ENSBTAG00000000411(HGS),ENSBTAG00000000437(FFAR4),ENSBTAG00000000476(THPO),ENSBTAG00000000484(HYAL2),ENSBTAG00000000548(KLHDC10),ENSBTAG00000000563(MYD88),ENSBTAG00000000570(RET),ENSBTAG00000000604(GPNMB),ENSBTAG00000000660(FAM83D),ENSBTA…
BP	GO:0009889	regulation of biosynthetic process	1e-14	6.80105e-13	ENSBTAG00000000009(FOXF1),ENSBTAG00000000013(PRKAA1),ENSBTAG00000000023(RNF2),ENSBTAG00000000031(TRPV4),ENSBTAG00000000039(SIRT7),ENSBTAG00000000040(MAFG),ENSBTAG00000000072(TFB2M),ENSBTAG00000000074(NFIA),ENSBTAG00000000092(HIF1AN),ENSBTAG00000000098(SETDB1),ENSBTAG00000000113(ARHGEF2),ENSBTAG00000000124(DHH),ENSBTAG00000000152(RANBP2),ENSBTAG00000000184(EIF2AK3),ENSBTAG00000000201(LTN1),ENSBTAG…
BP	GO:0042327	positive regulation of phosphorylation	1.1e-14	7.4292e-13	ENSBTAG00000000031(TRPV4),ENSBTAG00000000056(STRADA),ENSBTAG00000000078(GLIPR2),ENSBTAG00000000113(ARHGEF2),ENSBTAG00000000128(FGF18),ENSBTAG00000000152(RANBP2),ENSBTAG00000000205(MMD),ENSBTAG00000000218(MAP2K5),ENSBTAG00000000231(BMPR1A),ENSBTAG00000000283(CSF1),ENSBTAG00000000305(LMO4),ENSBTAG00000000317(MAPK8IP1),ENSBTAG00000000354(PDE6G),ENSBTAG00000000437(FFAR4),ENSBTAG00000000469(PPP2CA),EN…
BP	GO:0045859	regulation of protein kinase activity	1.1e-14	7.4292e-13	ENSBTAG00000000056(STRADA),ENSBTAG00000000128(FGF18),ENSBTAG00000000205(MMD),ENSBTAG00000000218(MAP2K5),ENSBTAG00000000283(CSF1),ENSBTAG00000000354(PDE6G),ENSBTAG00000000411(HGS),ENSBTAG00000000436(TNFAIP3),ENSBTAG00000000469(PPP2CA),ENSBTAG00000000484(HYAL2),ENSBTAG00000000570(RET),ENSBTAG00000000599(CCNI),ENSBTAG00000000730(GCG),ENSBTAG00000000746(KAT2B),ENSBTAG00000000778(HSP90AB1),ENSBTAG0000…
MF	GO:0008134	transcription factor binding	1.2e-14	8.07654e-13	ENSBTAG00000000074(NFIA),ENSBTAG00000000092(HIF1AN),ENSBTAG00000000266(NAB1),ENSBTAG00000000305(LMO4),ENSBTAG00000000396(PIM1),ENSBTAG00000000483(HYAL1),ENSBTAG00000000504(GTF2B),ENSBTAG00000000569(HES1),ENSBTAG00000000656(NFATC1),ENSBTAG00000000746(KAT2B),ENSBTAG00000000837(PARP1),ENSBTAG00000000895(TAF9B),ENSBTAG00000000919(HEY2),ENSBTAG00000001009(HCLS1),ENSBTAG00000001063(HOXA4),ENSBTAG000000…
BP	GO:0080135	regulation of cellular response to stress	1.3e-14	8.65969e-13	ENSBTAG00000000031(TRPV4),ENSBTAG00000000042(PYCR1),ENSBTAG00000000184(EIF2AK3),ENSBTAG00000000231(BMPR1A),ENSBTAG00000000253(PTPRF),ENSBTAG00000000312(GRINA),ENSBTAG00000000317(MAPK8IP1),ENSBTAG00000000428(BAK1),ENSBTAG00000000548(KLHDC10),ENSBTAG00000000563(MYD88),ENSBTAG00000000640(SELENOS),ENSBTAG00000000753(PIAS4),ENSBTAG00000000837(PARP1),ENSBTAG00000000878(RB1CC1),ENSBTAG00000000892(CGAS),…
BP	GO:0007005	mitochondrion organization	1.3e-14	8.65969e-13	ENSBTAG00000000013(PRKAA1),ENSBTAG00000000081(COL4A3BP),ENSBTAG00000000091(NDUFB8),ENSBTAG00000000094(ATPAF1),ENSBTAG00000000243(HEBP2),ENSBTAG00000000428(BAK1),ENSBTAG00000000475(IMMP1L),ENSBTAG00000000550(ATP5F1D),ENSBTAG00000000562(TOMM20),ENSBTAG00000000705(COX7A2L),ENSBTAG00000000782(KDR),ENSBTAG00000000784(MTERF4),ENSBTAG00000000808(COX14),ENSBTAG00000000837(PARP1),ENSBTAG00000000878(RB1CC1…
CC	GO:0120025	plasma membrane bounded cell projection	1.3e-14	8.65969e-13	ENSBTAG00000000013(PRKAA1),ENSBTAG00000000031(TRPV4),ENSBTAG00000000032(ABI3),ENSBTAG00000000088(ALCAM),ENSBTAG00000000109(NPTXR),ENSBTAG00000000113(ARHGEF2),ENSBTAG00000000153(LRFN3),ENSBTAG00000000210(ARHGAP31),ENSBTAG00000000215(GNB1),ENSBTAG00000000241(STAU1),ENSBTAG00000000253(PTPRF),ENSBTAG00000000271(MNS1),ENSBTAG00000000286(PFKM),ENSBTAG00000000317(MAPK8IP1),ENSBTAG00000000322(CD2AP),ENSB…
BP	GO:0071345	cellular response to cytokine stimulus	1.8e-14	1.19088e-12	ENSBTAG00000000009(FOXF1),ENSBTAG00000000102(GPR75),ENSBTAG00000000251(ALAD),ENSBTAG00000000273(IL5RA),ENSBTAG00000000283(CSF1),ENSBTAG00000000292(TCIRG1),ENSBTAG00000000369(EPS8),ENSBTAG00000000415(ERBIN),ENSBTAG00000000476(THPO),ENSBTAG00000000483(HYAL1),ENSBTAG00000000484(HYAL2),ENSBTAG00000000630(LSM14A),ENSBTAG00000000696(ILK),ENSBTAG00000000738(DAPK1),ENSBTAG00000000753(PIAS4),ENSBTAG000000…
BP	GO:0051093	negative regulation of developmental process	1.8e-14	1.19088e-12	ENSBTAG00000000031(TRPV4),ENSBTAG00000000113(ARHGEF2),ENSBTAG00000000164(GNRH1),ENSBTAG00000000231(BMPR1A),ENSBTAG00000000411(HGS),ENSBTAG00000000469(PPP2CA),ENSBTAG00000000522(AHSG),ENSBTAG00000000541(NKX2-1),ENSBTAG00000000546(TOB1),ENSBTAG00000000569(HES1),ENSBTAG00000000616(GPR161),ENSBTAG00000000625(SMAD6),ENSBTAG00000000656(NFATC1),ENSBTAG00000000815(EPHA2),ENSBTAG00000000842(UBASH3B),ENSBT…
BP	GO:0048534	hematopoietic or lymphoid organ development	2.3e-14	1.51652e-12	ENSBTAG00000000016(LTA),ENSBTAG00000000026(VPS33B),ENSBTAG00000000225(POLB),ENSBTAG00000000283(CSF1),ENSBTAG00000000291(DHTKD1),ENSBTAG00000000292(TCIRG1),ENSBTAG00000000305(LMO4),ENSBTAG00000000306(ITK),ENSBTAG00000000396(PIM1),ENSBTAG00000000428(BAK1),ENSBTAG00000000476(THPO),ENSBTAG00000000484(HYAL2),ENSBTAG00000000569(HES1),ENSBTAG00000000570(RET),ENSBTAG00000000679(PGM3),ENSBTAG00000000815(E…
BP	GO:0044087	regulation of cellular component biogenesis	2.7e-14	1.77425e-12	ENSBTAG00000000113(ARHGEF2),ENSBTAG00000000271(MNS1),ENSBTAG00000000305(LMO4),ENSBTAG00000000347(RHOG),ENSBTAG00000000369(EPS8),ENSBTAG00000000411(HGS),ENSBTAG00000000483(HYAL1),ENSBTAG00000000504(GTF2B),ENSBTAG00000000625(SMAD6),ENSBTAG00000000653(PPP1R16B),ENSBTAG00000000684(ARHGEF10L),ENSBTAG00000000746(KAT2B),ENSBTAG00000000771(DNAJB6),ENSBTAG00000000782(KDR),ENSBTAG00000000815(EPHA2),ENSBTAG…
BP	GO:0019752	carboxylic acid metabolic process	2.9e-14	1.89926e-12	ENSBTAG00000000011(TDH),ENSBTAG00000000013(PRKAA1),ENSBTAG00000000042(PYCR1),ENSBTAG00000000085(CYP1A2),ENSBTAG00000000123(HAO2),ENSBTAG00000000160(CBS),ENSBTAG00000000163(DDIT4),ENSBTAG00000000246(ME3),ENSBTAG00000000286(PFKM),ENSBTAG00000000287(GNPDA2),ENSBTAG00000000291(DHTKD1),ENSBTAG00000000342(PLOD3),ENSBTAG00000000483(HYAL1),ENSBTAG00000000484(HYAL2),ENSBTAG00000000492(ASNSD1),ENSBTAG00000…
BP	GO:0008285	negative regulation of cell proliferation	3e-14	1.95815e-12	ENSBTAG00000000095(CD274),ENSBTAG00000000436(TNFAIP3),ENSBTAG00000000546(TOB1),ENSBTAG00000000569(HES1),ENSBTAG00000000604(GPNMB),ENSBTAG00000000625(SMAD6),ENSBTAG00000000696(ILK),ENSBTAG00000000711(NDRG1),ENSBTAG00000000746(KAT2B),ENSBTAG00000000833(TAX1BP3),ENSBTAG00000000843(NDRG2),ENSBTAG00000001069(TP53),ENSBTAG00000001221(NKX3-1),ENSBTAG00000001228(CEND1),ENSBTAG00000001321(IL1B),ENSBTAG000…
CC	GO:0032991	macromolecular complex	3.4e-14	2.21182e-12	ENSBTAG00000000013(PRKAA1),ENSBTAG00000000020(TRPV3),ENSBTAG00000000021(WASHC3),ENSBTAG00000000022(NUP37),ENSBTAG00000000023(RNF2),ENSBTAG00000000026(VPS33B),ENSBTAG00000000037(CWC27),ENSBTAG00000000039(SIRT7),ENSBTAG00000000054(SNAPC4),ENSBTAG00000000064(FEN1),ENSBTAG00000000076(RECK),ENSBTAG00000000080(GRWD1),ENSBTAG00000000088(ALCAM),ENSBTAG00000000090(SEC31B),ENSBTAG00000000091(NDUFB8),ENSBTA…
BP	GO:0040012	regulation of locomotion	3.6e-14	2.33412e-12	ENSBTAG00000000009(FOXF1),ENSBTAG00000000031(TRPV4),ENSBTAG00000000032(ABI3),ENSBTAG00000000076(RECK),ENSBTAG00000000078(GLIPR2),ENSBTAG00000000113(ARHGEF2),ENSBTAG00000000128(FGF18),ENSBTAG00000000164(GNRH1),ENSBTAG00000000182(SPINT2),ENSBTAG00000000231(BMPR1A),ENSBTAG00000000283(CSF1),ENSBTAG00000000305(LMO4),ENSBTAG00000000483(HYAL1),ENSBTAG00000000484(HYAL2),ENSBTAG00000000541(NKX2-1),ENSBTAG…
CC	GO:1990234	transferase complex	4e-14	2.58485e-12	ENSBTAG00000000013(PRKAA1),ENSBTAG00000000023(RNF2),ENSBTAG00000000131(SENP3),ENSBTAG00000000162(ANAPC16),ENSBTAG00000000252(POLE3),ENSBTAG00000000286(PFKM),ENSBTAG00000000291(DHTKD1),ENSBTAG00000000501(KLHL13),ENSBTAG00000000504(GTF2B),ENSBTAG00000000579(NIPBL),ENSBTAG00000000590(POLE),ENSBTAG00000000599(CCNI),ENSBTAG00000000642(INTS1),ENSBTAG00000000694(TAF10),ENSBTAG00000000746(KAT2B),ENSBTAG0…
BP	GO:0033993	response to lipid	4.1e-14	2.6407e-12	ENSBTAG00000000013(PRKAA1),ENSBTAG00000000095(CD274),ENSBTAG00000000163(DDIT4),ENSBTAG00000000164(GNRH1),ENSBTAG00000000215(GNB1),ENSBTAG00000000396(PIM1),ENSBTAG00000000415(ERBIN),ENSBTAG00000000436(TNFAIP3),ENSBTAG00000000442(RBP4),ENSBTAG00000000494(PDE4D),ENSBTAG00000000507(NR4A1),ENSBTAG00000000563(MYD88),ENSBTAG00000000570(RET),ENSBTAG00000000602(RXRB),ENSBTAG00000000625(SMAD6),ENSBTAG00000…
BP	GO:0090304	nucleic acid metabolic process	4.3e-14	2.75129e-12	ENSBTAG00000000009(FOXF1),ENSBTAG00000000013(PRKAA1),ENSBTAG00000000023(RNF2),ENSBTAG00000000031(TRPV4),ENSBTAG00000000039(SIRT7),ENSBTAG00000000040(MAFG),ENSBTAG00000000054(SNAPC4),ENSBTAG00000000064(FEN1),ENSBTAG00000000072(TFB2M),ENSBTAG00000000074(NFIA),ENSBTAG00000000080(GRWD1),ENSBTAG00000000092(HIF1AN),ENSBTAG00000000098(SETDB1),ENSBTAG00000000113(ARHGEF2),ENSBTAG00000000130(TNFSF13),ENSBT…
BP	GO:0001944	vasculature development	4.3e-14	2.75129e-12	ENSBTAG00000000009(FOXF1),ENSBTAG00000000076(RECK),ENSBTAG00000000128(FGF18),ENSBTAG00000000184(EIF2AK3),ENSBTAG00000000231(BMPR1A),ENSBTAG00000000411(HGS),ENSBTAG00000000428(BAK1),ENSBTAG00000000483(HYAL1),ENSBTAG00000000569(HES1),ENSBTAG00000000625(SMAD6),ENSBTAG00000000653(PPP1R16B),ENSBTAG00000000656(NFATC1),ENSBTAG00000000700(PARVA),ENSBTAG00000000742(AMOTL2),ENSBTAG00000000745(AQP1),ENSBTAG…
MF	GO:0004672	protein kinase activity	4.8e-14	3.06114e-12	ENSBTAG00000000005(GRK3),ENSBTAG00000000013(PRKAA1),ENSBTAG00000000056(STRADA),ENSBTAG00000000184(EIF2AK3),ENSBTAG00000000205(MMD),ENSBTAG00000000218(MAP2K5),ENSBTAG00000000220(NEK10),ENSBTAG00000000231(BMPR1A),ENSBTAG00000000306(ITK),ENSBTAG00000000357(PRAG1),ENSBTAG00000000377(BMX),ENSBTAG00000000396(PIM1),ENSBTAG00000000570(RET),ENSBTAG00000000582(LY6G6E),ENSBTAG00000000599(CCNI),ENSBTAG000000…
BP	GO:0072358	cardiovascular system development	4.9e-14	3.1147e-12	ENSBTAG00000000009(FOXF1),ENSBTAG00000000076(RECK),ENSBTAG00000000128(FGF18),ENSBTAG00000000184(EIF2AK3),ENSBTAG00000000231(BMPR1A),ENSBTAG00000000411(HGS),ENSBTAG00000000428(BAK1),ENSBTAG00000000483(HYAL1),ENSBTAG00000000569(HES1),ENSBTAG00000000625(SMAD6),ENSBTAG00000000653(PPP1R16B),ENSBTAG00000000656(NFATC1),ENSBTAG00000000700(PARVA),ENSBTAG00000000742(AMOTL2),ENSBTAG00000000745(AQP1),ENSBTAG…
BP	GO:0031326	regulation of cellular biosynthetic process	5.3e-14	3.35799e-12	ENSBTAG00000000009(FOXF1),ENSBTAG00000000013(PRKAA1),ENSBTAG00000000023(RNF2),ENSBTAG00000000031(TRPV4),ENSBTAG00000000039(SIRT7),ENSBTAG00000000040(MAFG),ENSBTAG00000000072(TFB2M),ENSBTAG00000000074(NFIA),ENSBTAG00000000092(HIF1AN),ENSBTAG00000000098(SETDB1),ENSBTAG00000000113(ARHGEF2),ENSBTAG00000000184(EIF2AK3),ENSBTAG00000000201(LTN1),ENSBTAG00000000222(ARID4B),ENSBTAG00000000231(BMPR1A),ENSB…
BP	GO:0009058	biosynthetic process	5.7e-14	3.5997e-12	ENSBTAG00000000009(FOXF1),ENSBTAG00000000013(PRKAA1),ENSBTAG00000000019(SERINC1),ENSBTAG00000000023(RNF2),ENSBTAG00000000031(TRPV4),ENSBTAG00000000039(SIRT7),ENSBTAG00000000040(MAFG),ENSBTAG00000000042(PYCR1),ENSBTAG00000000054(SNAPC4),ENSBTAG00000000064(FEN1),ENSBTAG00000000065(CRLS1),ENSBTAG00000000072(TFB2M),ENSBTAG00000000074(NFIA),ENSBTAG00000000077(ADSL),ENSBTAG00000000080(GRWD1),ENSBTAG000…
BP	GO:1901576	organic substance biosynthetic process	5.9e-14	3.70196e-12	ENSBTAG00000000009(FOXF1),ENSBTAG00000000013(PRKAA1),ENSBTAG00000000019(SERINC1),ENSBTAG00000000023(RNF2),ENSBTAG00000000031(TRPV4),ENSBTAG00000000039(SIRT7),ENSBTAG00000000040(MAFG),ENSBTAG00000000042(PYCR1),ENSBTAG00000000054(SNAPC4),ENSBTAG00000000064(FEN1),ENSBTAG00000000065(CRLS1),ENSBTAG00000000072(TFB2M),ENSBTAG00000000074(NFIA),ENSBTAG00000000077(ADSL),ENSBTAG00000000080(GRWD1),ENSBTAG000…
BP	GO:0030029	actin filament-based process	5.9e-14	3.70196e-12	ENSBTAG00000000021(WASHC3),ENSBTAG00000000031(TRPV4),ENSBTAG00000000113(ARHGEF2),ENSBTAG00000000322(CD2AP),ENSBTAG00000000347(RHOG),ENSBTAG00000000369(EPS8),ENSBTAG00000000490(RTKN),ENSBTAG00000000494(PDE4D),ENSBTAG00000000512(SNTA1),ENSBTAG00000000684(ARHGEF10L),ENSBTAG00000000700(PARVA),ENSBTAG00000000742(AMOTL2),ENSBTAG00000000745(AQP1),ENSBTAG00000000771(DNAJB6),ENSBTAG00000000871(TRIM27),ENS…
BP	GO:0001934	positive regulation of protein phosphorylation	7.3e-14	4.56567e-12	ENSBTAG00000000031(TRPV4),ENSBTAG00000000056(STRADA),ENSBTAG00000000078(GLIPR2),ENSBTAG00000000113(ARHGEF2),ENSBTAG00000000128(FGF18),ENSBTAG00000000205(MMD),ENSBTAG00000000218(MAP2K5),ENSBTAG00000000231(BMPR1A),ENSBTAG00000000283(CSF1),ENSBTAG00000000317(MAPK8IP1),ENSBTAG00000000354(PDE6G),ENSBTAG00000000437(FFAR4),ENSBTAG00000000469(PPP2CA),ENSBTAG00000000476(THPO),ENSBTAG00000000548(KLHDC10),E…
BP	GO:0032101	regulation of response to external stimulus	7.5e-14	4.67572e-12	ENSBTAG00000000009(FOXF1),ENSBTAG00000000016(LTA),ENSBTAG00000000026(VPS33B),ENSBTAG00000000031(TRPV4),ENSBTAG00000000128(FGF18),ENSBTAG00000000223(PPM1B),ENSBTAG00000000253(PTPRF),ENSBTAG00000000283(CSF1),ENSBTAG00000000435(TARBP2),ENSBTAG00000000436(TNFAIP3),ENSBTAG00000000437(FFAR4),ENSBTAG00000000484(HYAL2),ENSBTAG00000000522(AHSG),ENSBTAG00000000563(MYD88),ENSBTAG00000000640(SELENOS),ENSBTAG…
BP	GO:0051050	positive regulation of transport	7.6e-14	4.72293e-12	ENSBTAG00000000013(PRKAA1),ENSBTAG00000000031(TRPV4),ENSBTAG00000000095(CD274),ENSBTAG00000000231(BMPR1A),ENSBTAG00000000259(CHIA),ENSBTAG00000000264(RFX6),ENSBTAG00000000286(PFKM),ENSBTAG00000000322(CD2AP),ENSBTAG00000000411(HGS),ENSBTAG00000000428(BAK1),ENSBTAG00000000442(RBP4),ENSBTAG00000000460(SYTL2),ENSBTAG00000000484(HYAL2),ENSBTAG00000000511(CNST),ENSBTAG00000000522(AHSG),ENSBTAG000000005…
BP	GO:0044283	small molecule biosynthetic process	8.4e-14	5.20345e-12	ENSBTAG00000000042(PYCR1),ENSBTAG00000000152(RANBP2),ENSBTAG00000000160(CBS),ENSBTAG00000000342(PLOD3),ENSBTAG00000000442(RBP4),ENSBTAG00000000483(HYAL1),ENSBTAG00000000492(ASNSD1),ENSBTAG00000000497(AKR1A1),ENSBTAG00000000545(PPP4R3B),ENSBTAG00000000559(PLTP),ENSBTAG00000000686(NANP),ENSBTAG00000000730(GCG),ENSBTAG00000000746(KAT2B),ENSBTAG00000000894(PGK1),ENSBTAG00000000902(OGT),ENSBTAG0000000…
BP	GO:0030097	hemopoiesis	1.1e-13	6.79241e-12	ENSBTAG00000000026(VPS33B),ENSBTAG00000000283(CSF1),ENSBTAG00000000291(DHTKD1),ENSBTAG00000000292(TCIRG1),ENSBTAG00000000306(ITK),ENSBTAG00000000396(PIM1),ENSBTAG00000000428(BAK1),ENSBTAG00000000476(THPO),ENSBTAG00000000484(HYAL2),ENSBTAG00000000569(HES1),ENSBTAG00000000679(PGM3),ENSBTAG00000000815(EPHA2),ENSBTAG00000000816(PRDM1),ENSBTAG00000000842(UBASH3B),ENSBTAG00000000888(SPTA1),ENSBTAG00000…
BP	GO:0030334	regulation of cell migration	1.2e-13	7.38646e-12	ENSBTAG00000000009(FOXF1),ENSBTAG00000000031(TRPV4),ENSBTAG00000000032(ABI3),ENSBTAG00000000076(RECK),ENSBTAG00000000078(GLIPR2),ENSBTAG00000000113(ARHGEF2),ENSBTAG00000000128(FGF18),ENSBTAG00000000164(GNRH1),ENSBTAG00000000231(BMPR1A),ENSBTAG00000000283(CSF1),ENSBTAG00000000305(LMO4),ENSBTAG00000000483(HYAL1),ENSBTAG00000000484(HYAL2),ENSBTAG00000000541(NKX2-1),ENSBTAG00000000563(MYD88),ENSBTAG0…
BP	GO:2001233	regulation of apoptotic signaling pathway	1.3e-13	7.97675e-12	ENSBTAG00000000184(EIF2AK3),ENSBTAG00000000312(GRINA),ENSBTAG00000000317(MAPK8IP1),ENSBTAG00000000399(NANOS3),ENSBTAG00000000436(TNFAIP3),ENSBTAG00000000484(HYAL2),ENSBTAG00000000640(SELENOS),ENSBTAG00000000735(BCL2A1),ENSBTAG00000000753(PIAS4),ENSBTAG00000000878(RB1CC1),ENSBTAG00000001014(MAPK7),ENSBTAG00000001069(TP53),ENSBTAG00000001096(PRKRA),ENSBTAG00000001221(NKX3-1),ENSBTAG00000001223(CAAP…
BP	GO:0006954	inflammatory response	2e-13	1.22333e-11	ENSBTAG00000000009(FOXF1),ENSBTAG00000000016(LTA),ENSBTAG00000000031(TRPV4),ENSBTAG00000000225(POLB),ENSBTAG00000000259(CHIA),ENSBTAG00000000273(IL5RA),ENSBTAG00000000283(CSF1),ENSBTAG00000000292(TCIRG1),ENSBTAG00000000436(TNFAIP3),ENSBTAG00000000437(FFAR4),ENSBTAG00000000483(HYAL1),ENSBTAG00000000484(HYAL2),ENSBTAG00000000522(AHSG),ENSBTAG00000000563(MYD88),ENSBTAG00000000640(SELENOS),ENSBTAG000…
BP	GO:0051656	establishment of organelle localization	2.4e-13	1.45882e-11	ENSBTAG00000000009(FOXF1),ENSBTAG00000000113(ARHGEF2),ENSBTAG00000000274(YKT6),ENSBTAG00000000500(PINX1),ENSBTAG00000000529(BTBD9),ENSBTAG00000000660(FAM83D),ENSBTAG00000000764(GIPC1),ENSBTAG00000000854(SEC16B),ENSBTAG00000001037(MAP4K2),ENSBTAG00000001057(ARFGAP3),ENSBTAG00000001243(AP3M2),ENSBTAG00000001323(CENPC),ENSBTAG00000001332(MYO1C),ENSBTAG00000001394(TMED9),ENSBTAG00000001398(ATP2A2),EN…
CC	GO:0000323	lytic vacuole	2.4e-13	1.45882e-11	ENSBTAG00000000026(VPS33B),ENSBTAG00000000133(CD68),ENSBTAG00000000203(ATP6V1G1),ENSBTAG00000000292(TCIRG1),ENSBTAG00000000411(HGS),ENSBTAG00000000483(HYAL1),ENSBTAG00000000484(HYAL2),ENSBTAG00000000564(NSG2),ENSBTAG00000000704(GUSB),ENSBTAG00000000720(CTSL),ENSBTAG00000000831(CTNS),ENSBTAG00000000878(RB1CC1),ENSBTAG00000001008(PRF1),ENSBTAG00000001060(CXCR4),ENSBTAG00000001193(UNC93B1),ENSBTAG00…
BP	GO:0043547	positive regulation of GTPase activity	2.7e-13	1.63607e-11	ENSBTAG00000000147(RIC8B),ENSBTAG00000000152(RANBP2),ENSBTAG00000000210(ARHGAP31),ENSBTAG00000000333(ARHGAP20),ENSBTAG00000000347(RHOG),ENSBTAG00000000571(ARHGAP27),ENSBTAG00000000713(AGFG2),ENSBTAG00000000815(EPHA2),ENSBTAG00000000833(TAX1BP3),ENSBTAG00000000942(SIPA1L2),ENSBTAG00000001029(RASGRP2),ENSBTAG00000001057(ARFGAP3),ENSBTAG00000001191(CCL17),ENSBTAG00000001295(DEPDC5),ENSBTAG0000000140…
BP	GO:0001568	blood vessel development	2.9e-13	1.7518e-11	ENSBTAG00000000009(FOXF1),ENSBTAG00000000076(RECK),ENSBTAG00000000128(FGF18),ENSBTAG00000000184(EIF2AK3),ENSBTAG00000000231(BMPR1A),ENSBTAG00000000411(HGS),ENSBTAG00000000428(BAK1),ENSBTAG00000000483(HYAL1),ENSBTAG00000000569(HES1),ENSBTAG00000000625(SMAD6),ENSBTAG00000000653(PPP1R16B),ENSBTAG00000000700(PARVA),ENSBTAG00000000742(AMOTL2),ENSBTAG00000000745(AQP1),ENSBTAG00000000782(KDR),ENSBTAG000…
CC	GO:0005764	lysosome	3.1e-13	1.86681e-11	ENSBTAG00000000026(VPS33B),ENSBTAG00000000133(CD68),ENSBTAG00000000203(ATP6V1G1),ENSBTAG00000000292(TCIRG1),ENSBTAG00000000411(HGS),ENSBTAG00000000483(HYAL1),ENSBTAG00000000484(HYAL2),ENSBTAG00000000564(NSG2),ENSBTAG00000000704(GUSB),ENSBTAG00000000720(CTSL),ENSBTAG00000000831(CTNS),ENSBTAG00000000878(RB1CC1),ENSBTAG00000001008(PRF1),ENSBTAG00000001060(CXCR4),ENSBTAG00000001193(UNC93B1),ENSBTAG00…
BP	GO:2000145	regulation of cell motility	3.2e-13	1.9093e-11	ENSBTAG00000000009(FOXF1),ENSBTAG00000000031(TRPV4),ENSBTAG00000000032(ABI3),ENSBTAG00000000076(RECK),ENSBTAG00000000078(GLIPR2),ENSBTAG00000000113(ARHGEF2),ENSBTAG00000000128(FGF18),ENSBTAG00000000164(GNRH1),ENSBTAG00000000182(SPINT2),ENSBTAG00000000231(BMPR1A),ENSBTAG00000000283(CSF1),ENSBTAG00000000305(LMO4),ENSBTAG00000000483(HYAL1),ENSBTAG00000000484(HYAL2),ENSBTAG00000000541(NKX2-1),ENSBTAG…
BP	GO:0051336	regulation of hydrolase activity	3.2e-13	1.9093e-11	ENSBTAG00000000076(RECK),ENSBTAG00000000147(RIC8B),ENSBTAG00000000152(RANBP2),ENSBTAG00000000182(SPINT2),ENSBTAG00000000210(ARHGAP31),ENSBTAG00000000306(ITK),ENSBTAG00000000333(ARHGAP20),ENSBTAG00000000347(RHOG),ENSBTAG00000000428(BAK1),ENSBTAG00000000460(SYTL2),ENSBTAG00000000490(RTKN),ENSBTAG00000000507(NR4A1),ENSBTAG00000000511(CNST),ENSBTAG00000000522(AHSG),ENSBTAG00000000571(ARHGAP27),ENSBTA…
BP	GO:1902532	negative regulation of intracellular signal transduction	3.2e-13	1.9093e-11	ENSBTAG00000000013(PRKAA1),ENSBTAG00000000163(DDIT4),ENSBTAG00000000223(PPM1B),ENSBTAG00000000312(GRINA),ENSBTAG00000000317(MAPK8IP1),ENSBTAG00000000322(CD2AP),ENSBTAG00000000411(HGS),ENSBTAG00000000415(ERBIN),ENSBTAG00000000436(TNFAIP3),ENSBTAG00000000484(HYAL2),ENSBTAG00000000494(PDE4D),ENSBTAG00000000640(SELENOS),ENSBTAG00000000735(BCL2A1),ENSBTAG00000000815(EPHA2),ENSBTAG00000000843(NDRG2),EN…
MF	GO:0019904	protein domain specific binding	3.5e-13	2.07556e-11	ENSBTAG00000000023(RNF2),ENSBTAG00000000025(RAB6A),ENSBTAG00000000031(TRPV4),ENSBTAG00000000032(ABI3),ENSBTAG00000000092(HIF1AN),ENSBTAG00000000210(ARHGAP31),ENSBTAG00000000236(YWHAZ),ENSBTAG00000000322(CD2AP),ENSBTAG00000000411(HGS),ENSBTAG00000000520(ATP2B3),ENSBTAG00000000561(OCLN),ENSBTAG00000000563(MYD88),ENSBTAG00000000579(NIPBL),ENSBTAG00000000668(SLC22A5),ENSBTAG00000000778(HSP90AB1),ENSB…
BP	GO:0045597	positive regulation of cell differentiation	3.5e-13	2.07556e-11	ENSBTAG00000000078(GLIPR2),ENSBTAG00000000092(HIF1AN),ENSBTAG00000000113(ARHGEF2),ENSBTAG00000000128(FGF18),ENSBTAG00000000205(MMD),ENSBTAG00000000231(BMPR1A),ENSBTAG00000000283(CSF1),ENSBTAG00000000395(ADAMTS20),ENSBTAG00000000435(TARBP2),ENSBTAG00000000476(THPO),ENSBTAG00000000540(RNF112),ENSBTAG00000000569(HES1),ENSBTAG00000000570(RET),ENSBTAG00000000579(NIPBL),ENSBTAG00000000588(CHODL),ENSBTA…
BP	GO:0060429	epithelium development	6e-13	3.54729e-11	ENSBTAG00000000009(FOXF1),ENSBTAG00000000040(MAFG),ENSBTAG00000000182(SPINT2),ENSBTAG00000000222(ARID4B),ENSBTAG00000000231(BMPR1A),ENSBTAG00000000264(RFX6),ENSBTAG00000000283(CSF1),ENSBTAG00000000305(LMO4),ENSBTAG00000000342(PLOD3),ENSBTAG00000000541(NKX2-1),ENSBTAG00000000563(MYD88),ENSBTAG00000000569(HES1),ENSBTAG00000000570(RET),ENSBTAG00000000575(TNC),ENSBTAG00000000616(GPR161),ENSBTAG000000…
BP	GO:0019219	regulation of nucleobase-containing compound metabolic process	9e-13	5.30482e-11	ENSBTAG00000000009(FOXF1),ENSBTAG00000000013(PRKAA1),ENSBTAG00000000023(RNF2),ENSBTAG00000000031(TRPV4),ENSBTAG00000000039(SIRT7),ENSBTAG00000000040(MAFG),ENSBTAG00000000072(TFB2M),ENSBTAG00000000074(NFIA),ENSBTAG00000000092(HIF1AN),ENSBTAG00000000098(SETDB1),ENSBTAG00000000113(ARHGEF2),ENSBTAG00000000130(TNFSF13),ENSBTAG00000000163(DDIT4),ENSBTAG00000000184(EIF2AK3),ENSBTAG00000000222(ARID4B),EN…
MF	GO:0032559	adenyl ribonucleotide binding	1.1e-12	6.44461e-11	ENSBTAG00000000005(GRK3),ENSBTAG00000000013(PRKAA1),ENSBTAG00000000056(STRADA),ENSBTAG00000000132(EIF4A1),ENSBTAG00000000184(EIF2AK3),ENSBTAG00000000218(MAP2K5),ENSBTAG00000000220(NEK10),ENSBTAG00000000231(BMPR1A),ENSBTAG00000000286(PFKM),ENSBTAG00000000306(ITK),ENSBTAG00000000357(PRAG1),ENSBTAG00000000377(BMX),ENSBTAG00000000396(PIM1),ENSBTAG00000000473(ATP10D),ENSBTAG00000000494(PDE4D),ENSBTAG0…
BP	GO:0010035	response to inorganic substance	1.1e-12	6.44461e-11	ENSBTAG00000000013(PRKAA1),ENSBTAG00000000042(PYCR1),ENSBTAG00000000085(CYP1A2),ENSBTAG00000000292(TCIRG1),ENSBTAG00000000436(TNFAIP3),ENSBTAG00000000540(RNF112),ENSBTAG00000000555(ACO1),ENSBTAG00000000745(AQP1),ENSBTAG00000000782(KDR),ENSBTAG00000001013(SLC30A5),ENSBTAG00000001014(MAPK7),ENSBTAG00000001029(RASGRP2),ENSBTAG00000001250(TFAP2A),ENSBTAG00000001306(FXN),ENSBTAG00000001553(HNRNPA1),EN…
MF	GO:0030234	enzyme regulator activity	1.2e-12	6.98838e-11	ENSBTAG00000000056(STRADA),ENSBTAG00000000076(RECK),ENSBTAG00000000147(RIC8B),ENSBTAG00000000152(RANBP2),ENSBTAG00000000182(SPINT2),ENSBTAG00000000210(ARHGAP31),ENSBTAG00000000333(ARHGAP20),ENSBTAG00000000484(HYAL2),ENSBTAG00000000490(RTKN),ENSBTAG00000000500(PINX1),ENSBTAG00000000522(AHSG),ENSBTAG00000000571(ARHGAP27),ENSBTAG00000000598(CST3),ENSBTAG00000000599(CCNI),ENSBTAG00000000653(PPP1R16B)…
BP	GO:0043410	positive regulation of MAPK cascade	1.2e-12	6.98838e-11	ENSBTAG00000000031(TRPV4),ENSBTAG00000000078(GLIPR2),ENSBTAG00000000128(FGF18),ENSBTAG00000000218(MAP2K5),ENSBTAG00000000317(MAPK8IP1),ENSBTAG00000000354(PDE6G),ENSBTAG00000000437(FFAR4),ENSBTAG00000000476(THPO),ENSBTAG00000000548(KLHDC10),ENSBTAG00000000563(MYD88),ENSBTAG00000000570(RET),ENSBTAG00000000604(GPNMB),ENSBTAG00000000730(GCG),ENSBTAG00000000759(NENF),ENSBTAG00000000782(KDR),ENSBTAG000…
MF	GO:0030554	adenyl nucleotide binding	1.3e-12	7.52568e-11	ENSBTAG00000000005(GRK3),ENSBTAG00000000013(PRKAA1),ENSBTAG00000000056(STRADA),ENSBTAG00000000132(EIF4A1),ENSBTAG00000000184(EIF2AK3),ENSBTAG00000000218(MAP2K5),ENSBTAG00000000220(NEK10),ENSBTAG00000000231(BMPR1A),ENSBTAG00000000286(PFKM),ENSBTAG00000000306(ITK),ENSBTAG00000000357(PRAG1),ENSBTAG00000000377(BMX),ENSBTAG00000000396(PIM1),ENSBTAG00000000473(ATP10D),ENSBTAG00000000494(PDE4D),ENSBTAG0…
CC	GO:0015630	microtubule cytoskeleton	1.3e-12	7.52568e-11	ENSBTAG00000000049(CCDC77),ENSBTAG00000000113(ARHGEF2),ENSBTAG00000000147(RIC8B),ENSBTAG00000000218(MAP2K5),ENSBTAG00000000225(POLB),ENSBTAG00000000371(DIS3L),ENSBTAG00000000458(DYNC1LI2),ENSBTAG00000000469(PPP2CA),ENSBTAG00000000494(PDE4D),ENSBTAG00000000500(PINX1),ENSBTAG00000000545(PPP4R3B),ENSBTAG00000000566(CCDC14),ENSBTAG00000000640(SELENOS),ENSBTAG00000000650(TUBGCP6),ENSBTAG00000000660(FA…
BP	GO:0010256	endomembrane system organization	1.4e-12	8.08053e-11	ENSBTAG00000000024(DYM),ENSBTAG00000000026(VPS33B),ENSBTAG00000000081(COL4A3BP),ENSBTAG00000000090(SEC31B),ENSBTAG00000000275(PARP11),ENSBTAG00000000711(NDRG1),ENSBTAG00000000745(AQP1),ENSBTAG00000000807(TMED3),ENSBTAG00000000854(SEC16B),ENSBTAG00000000888(SPTA1),ENSBTAG00000000948(RAB2A),ENSBTAG00000000985(RAB10),ENSBTAG00000001394(TMED9),ENSBTAG00000001398(ATP2A2),ENSBTAG00000001400(AKT2),ENSBT…
BP	GO:0022008	neurogenesis	1.5e-12	8.6321e-11	ENSBTAG00000000056(STRADA),ENSBTAG00000000088(ALCAM),ENSBTAG00000000109(NPTXR),ENSBTAG00000000113(ARHGEF2),ENSBTAG00000000137(FRYL),ENSBTAG00000000163(DDIT4),ENSBTAG00000000164(GNRH1),ENSBTAG00000000205(MMD),ENSBTAG00000000231(BMPR1A),ENSBTAG00000000253(PTPRF),ENSBTAG00000000266(NAB1),ENSBTAG00000000283(CSF1),ENSBTAG00000000305(LMO4),ENSBTAG00000000365(TDP2),ENSBTAG00000000413(NRTN),ENSBTAG000000…
BP	GO:0009628	response to abiotic stimulus	1.7e-12	9.75419e-11	ENSBTAG00000000013(PRKAA1),ENSBTAG00000000020(TRPV3),ENSBTAG00000000031(TRPV4),ENSBTAG00000000092(HIF1AN),ENSBTAG00000000163(DDIT4),ENSBTAG00000000184(EIF2AK3),ENSBTAG00000000203(ATP6V1G1),ENSBTAG00000000244(NRXN2),ENSBTAG00000000252(POLE3),ENSBTAG00000000321(TBL2),ENSBTAG00000000372(TIPIN),ENSBTAG00000000423(RBM4B),ENSBTAG00000000428(BAK1),ENSBTAG00000000445(PDE6C),ENSBTAG00000000483(HYAL1),ENSB…
BP	GO:0007167	enzyme linked receptor protein signaling pathway	1.8e-12	1.02976e-10	ENSBTAG00000000128(FGF18),ENSBTAG00000000163(DDIT4),ENSBTAG00000000231(BMPR1A),ENSBTAG00000000283(CSF1),ENSBTAG00000000354(PDE6G),ENSBTAG00000000411(HGS),ENSBTAG00000000413(NRTN),ENSBTAG00000000541(NKX2-1),ENSBTAG00000000546(TOB1),ENSBTAG00000000569(HES1),ENSBTAG00000000570(RET),ENSBTAG00000000582(LY6G6E),ENSBTAG00000000625(SMAD6),ENSBTAG00000000696(ILK),ENSBTAG00000000731(WFIKKN2),ENSBTAG0000000…
BP	GO:0009792	embryo development ending in birth or egg hatching	2e-12	1.13087e-10	ENSBTAG00000000009(FOXF1),ENSBTAG00000000040(MAFG),ENSBTAG00000000081(COL4A3BP),ENSBTAG00000000182(SPINT2),ENSBTAG00000000231(BMPR1A),ENSBTAG00000000305(LMO4),ENSBTAG00000000342(PLOD3),ENSBTAG00000000483(HYAL1),ENSBTAG00000000569(HES1),ENSBTAG00000000579(NIPBL),ENSBTAG00000000616(GPR161),ENSBTAG00000000771(DNAJB6),ENSBTAG00000000815(EPHA2),ENSBTAG00000000816(PRDM1),ENSBTAG00000000836(KRT8),ENSBTA…
BP	GO:0030036	actin cytoskeleton organization	2e-12	1.13087e-10	ENSBTAG00000000021(WASHC3),ENSBTAG00000000031(TRPV4),ENSBTAG00000000113(ARHGEF2),ENSBTAG00000000322(CD2AP),ENSBTAG00000000347(RHOG),ENSBTAG00000000369(EPS8),ENSBTAG00000000490(RTKN),ENSBTAG00000000684(ARHGEF10L),ENSBTAG00000000700(PARVA),ENSBTAG00000000742(AMOTL2),ENSBTAG00000000745(AQP1),ENSBTAG00000000771(DNAJB6),ENSBTAG00000000871(TRIM27),ENSBTAG00000000888(SPTA1),ENSBTAG00000000897(IQGAP2),EN…
BP	GO:0010629	negative regulation of gene expression	2e-12	1.13087e-10	ENSBTAG00000000009(FOXF1),ENSBTAG00000000013(PRKAA1),ENSBTAG00000000023(RNF2),ENSBTAG00000000031(TRPV4),ENSBTAG00000000039(SIRT7),ENSBTAG00000000074(NFIA),ENSBTAG00000000092(HIF1AN),ENSBTAG00000000098(SETDB1),ENSBTAG00000000169(ASZ1),ENSBTAG00000000252(POLE3),ENSBTAG00000000266(NAB1),ENSBTAG00000000267(SMG6),ENSBTAG00000000288(UPF2),ENSBTAG00000000332(ERF),ENSBTAG00000000399(NANOS3),ENSBTAG000000…
BP	GO:0030163	protein catabolic process	2e-12	1.13087e-10	ENSBTAG00000000010(UBL7),ENSBTAG00000000067(SDF2L1),ENSBTAG00000000120(USP43),ENSBTAG00000000149(USP40),ENSBTAG00000000201(LTN1),ENSBTAG00000000251(ALAD),ENSBTAG00000000279(RAB26),ENSBTAG00000000292(TCIRG1),ENSBTAG00000000320(UBAP1),ENSBTAG00000000436(TNFAIP3),ENSBTAG00000000640(SELENOS),ENSBTAG00000000660(FAM83D),ENSBTAG00000000720(CTSL),ENSBTAG00000000725(USP42),ENSBTAG00000000764(GIPC1),ENSBTA…
BP	GO:0007267	cell-cell signaling	2.1e-12	1.18397e-10	ENSBTAG00000000031(TRPV4),ENSBTAG00000000076(RECK),ENSBTAG00000000124(DHH),ENSBTAG00000000240(AKAP7),ENSBTAG00000000264(RFX6),ENSBTAG00000000279(RAB26),ENSBTAG00000000286(PFKM),ENSBTAG00000000292(TCIRG1),ENSBTAG00000000436(TNFAIP3),ENSBTAG00000000437(FFAR4),ENSBTAG00000000442(RBP4),ENSBTAG00000000534(PNOC),ENSBTAG00000000569(HES1),ENSBTAG00000000575(TNC),ENSBTAG00000000604(GPNMB),ENSBTAG000000006…
BP	GO:0019637	organophosphate metabolic process	2.4e-12	1.3492e-10	ENSBTAG00000000019(SERINC1),ENSBTAG00000000065(CRLS1),ENSBTAG00000000077(ADSL),ENSBTAG00000000091(NDUFB8),ENSBTAG00000000163(DDIT4),ENSBTAG00000000212(NADK),ENSBTAG00000000286(PFKM),ENSBTAG00000000296(IMPDH1),ENSBTAG00000000301,ENSBTAG00000000404(NAXE),ENSBTAG00000000494(PDE4D),ENSBTAG00000000541(NKX2-1),ENSBTAG00000000550(ATP5F1D),ENSBTAG00000000605(ATP5PF),ENSBTAG00000000639(APRT),ENSBTAG000000…
BP	GO:0051270	regulation of cellular component movement	2.5e-12	1.40137e-10	ENSBTAG00000000009(FOXF1),ENSBTAG00000000031(TRPV4),ENSBTAG00000000032(ABI3),ENSBTAG00000000076(RECK),ENSBTAG00000000078(GLIPR2),ENSBTAG00000000113(ARHGEF2),ENSBTAG00000000128(FGF18),ENSBTAG00000000164(GNRH1),ENSBTAG00000000182(SPINT2),ENSBTAG00000000231(BMPR1A),ENSBTAG00000000283(CSF1),ENSBTAG00000000305(LMO4),ENSBTAG00000000483(HYAL1),ENSBTAG00000000484(HYAL2),ENSBTAG00000000494(PDE4D),ENSBTAG0…
BP	GO:0043009	chordate embryonic development	2.7e-12	1.50913e-10	ENSBTAG00000000009(FOXF1),ENSBTAG00000000040(MAFG),ENSBTAG00000000081(COL4A3BP),ENSBTAG00000000182(SPINT2),ENSBTAG00000000231(BMPR1A),ENSBTAG00000000305(LMO4),ENSBTAG00000000342(PLOD3),ENSBTAG00000000483(HYAL1),ENSBTAG00000000569(HES1),ENSBTAG00000000579(NIPBL),ENSBTAG00000000616(GPR161),ENSBTAG00000000771(DNAJB6),ENSBTAG00000000815(EPHA2),ENSBTAG00000000816(PRDM1),ENSBTAG00000000836(KRT8),ENSBTA…
CC	GO:0030133	transport vesicle	2.8e-12	1.56054e-10	ENSBTAG00000000025(RAB6A),ENSBTAG00000000090(SEC31B),ENSBTAG00000000265(SYNPR),ENSBTAG00000000279(RAB26),ENSBTAG00000000393(SSPN),ENSBTAG00000000460(SYTL2),ENSBTAG00000000511(CNST),ENSBTAG00000000540(RNF112),ENSBTAG00000000737(DMXL2),ENSBTAG00000000764(GIPC1),ENSBTAG00000000799(ICA1),ENSBTAG00000000854(SEC16B),ENSBTAG00000000985(RAB10),ENSBTAG00000001137(CLTA),ENSBTAG00000001192(STX12),ENSBTAG000…
BP	GO:0048878	chemical homeostasis	2.9e-12	1.61165e-10	ENSBTAG00000000013(PRKAA1),ENSBTAG00000000031(TRPV4),ENSBTAG00000000081(COL4A3BP),ENSBTAG00000000203(ATP6V1G1),ENSBTAG00000000241(STAU1),ENSBTAG00000000264(RFX6),ENSBTAG00000000286(PFKM),ENSBTAG00000000292(TCIRG1),ENSBTAG00000000312(GRINA),ENSBTAG00000000428(BAK1),ENSBTAG00000000442(RBP4),ENSBTAG00000000484(HYAL2),ENSBTAG00000000494(PDE4D),ENSBTAG00000000496(SLC12A8),ENSBTAG00000000520(ATP2B3),EN…
BP	GO:0043933	macromolecular complex subunit organization	3.7e-12	2.05039e-10	ENSBTAG00000000021(WASHC3),ENSBTAG00000000026(VPS33B),ENSBTAG00000000077(ADSL),ENSBTAG00000000080(GRWD1),ENSBTAG00000000090(SEC31B),ENSBTAG00000000091(NDUFB8),ENSBTAG00000000094(ATPAF1),ENSBTAG00000000113(ARHGEF2),ENSBTAG00000000163(DDIT4),ENSBTAG00000000184(EIF2AK3),ENSBTAG00000000251(ALAD),ENSBTAG00000000252(POLE3),ENSBTAG00000000305(LMO4),ENSBTAG00000000342(PLOD3),ENSBTAG00000000343(ZNHIT1),EN…
MF	GO:0005524	ATP binding	3.9e-12	2.14898e-10	ENSBTAG00000000005(GRK3),ENSBTAG00000000013(PRKAA1),ENSBTAG00000000056(STRADA),ENSBTAG00000000132(EIF4A1),ENSBTAG00000000184(EIF2AK3),ENSBTAG00000000218(MAP2K5),ENSBTAG00000000220(NEK10),ENSBTAG00000000231(BMPR1A),ENSBTAG00000000286(PFKM),ENSBTAG00000000306(ITK),ENSBTAG00000000357(PRAG1),ENSBTAG00000000377(BMX),ENSBTAG00000000396(PIM1),ENSBTAG00000000473(ATP10D),ENSBTAG00000000520(ATP2B3),ENSBTAG…
BP	GO:0071407	cellular response to organic cyclic compound	3.9e-12	2.14898e-10	ENSBTAG00000000009(FOXF1),ENSBTAG00000000163(DDIT4),ENSBTAG00000000215(GNB1),ENSBTAG00000000396(PIM1),ENSBTAG00000000435(TARBP2),ENSBTAG00000000494(PDE4D),ENSBTAG00000000507(NR4A1),ENSBTAG00000000602(RXRB),ENSBTAG00000000745(AQP1),ENSBTAG00000000892(CGAS),ENSBTAG00000001021(CYP1A1),ENSBTAG00000001024(ARID1A),ENSBTAG00000001069(TP53),ENSBTAG00000001096(PRKRA),ENSBTAG00000001134(SRRT),ENSBTAG000000…
BP	GO:0060548	negative regulation of cell death	4.2e-12	2.30775e-10	ENSBTAG00000000013(PRKAA1),ENSBTAG00000000042(PYCR1),ENSBTAG00000000073(LRPAP1),ENSBTAG00000000283(CSF1),ENSBTAG00000000312(GRINA),ENSBTAG00000000317(MAPK8IP1),ENSBTAG00000000340(ADNP),ENSBTAG00000000395(ADAMTS20),ENSBTAG00000000396(PIM1),ENSBTAG00000000399(NANOS3),ENSBTAG00000000418(TOX3),ENSBTAG00000000436(TNFAIP3),ENSBTAG00000000437(FFAR4),ENSBTAG00000000507(NR4A1),ENSBTAG00000000604(GPNMB),EN…
BP	GO:0032940	secretion by cell	5.6e-12	3.06833e-10	ENSBTAG00000000009(FOXF1),ENSBTAG00000000021(WASHC3),ENSBTAG00000000026(VPS33B),ENSBTAG00000000031(TRPV4),ENSBTAG00000000095(CD274),ENSBTAG00000000259(CHIA),ENSBTAG00000000264(RFX6),ENSBTAG00000000274(YKT6),ENSBTAG00000000279(RAB26),ENSBTAG00000000286(PFKM),ENSBTAG00000000292(TCIRG1),ENSBTAG00000000322(CD2AP),ENSBTAG00000000411(HGS),ENSBTAG00000000436(TNFAIP3),ENSBTAG00000000437(FFAR4),ENSBTAG000…
BP	GO:0034641	cellular nitrogen compound metabolic process	5.7e-12	3.10562e-10	ENSBTAG00000000009(FOXF1),ENSBTAG00000000013(PRKAA1),ENSBTAG00000000023(RNF2),ENSBTAG00000000031(TRPV4),ENSBTAG00000000039(SIRT7),ENSBTAG00000000040(MAFG),ENSBTAG00000000054(SNAPC4),ENSBTAG00000000064(FEN1),ENSBTAG00000000072(TFB2M),ENSBTAG00000000074(NFIA),ENSBTAG00000000077(ADSL),ENSBTAG00000000080(GRWD1),ENSBTAG00000000081(COL4A3BP),ENSBTAG00000000091(NDUFB8),ENSBTAG00000000092(HIF1AN),ENSBTAG…
BP	GO:0010243	response to organonitrogen compound	5.7e-12	3.10562e-10	ENSBTAG00000000013(PRKAA1),ENSBTAG00000000031(TRPV4),ENSBTAG00000000067(SDF2L1),ENSBTAG00000000113(ARHGEF2),ENSBTAG00000000215(GNB1),ENSBTAG00000000415(ERBIN),ENSBTAG00000000436(TNFAIP3),ENSBTAG00000000438(GNRHR),ENSBTAG00000000494(PDE4D),ENSBTAG00000000507(NR4A1),ENSBTAG00000000563(MYD88),ENSBTAG00000000640(SELENOS),ENSBTAG00000000745(AQP1),ENSBTAG00000000746(KAT2B),ENSBTAG00000000837(PARP1),ENS…
BP	GO:0044257	cellular protein catabolic process	7.2e-12	3.91193e-10	ENSBTAG00000000010(UBL7),ENSBTAG00000000067(SDF2L1),ENSBTAG00000000120(USP43),ENSBTAG00000000149(USP40),ENSBTAG00000000201(LTN1),ENSBTAG00000000251(ALAD),ENSBTAG00000000292(TCIRG1),ENSBTAG00000000320(UBAP1),ENSBTAG00000000436(TNFAIP3),ENSBTAG00000000640(SELENOS),ENSBTAG00000000720(CTSL),ENSBTAG00000000725(USP42),ENSBTAG00000000764(GIPC1),ENSBTAG00000000778(HSP90AB1),ENSBTAG00000000856(FBXL6),ENSB…
BP	GO:0031329	regulation of cellular catabolic process	7.5e-12	4.06358e-10	ENSBTAG00000000013(PRKAA1),ENSBTAG00000000251(ALAD),ENSBTAG00000000267(SMG6),ENSBTAG00000000399(NANOS3),ENSBTAG00000000436(TNFAIP3),ENSBTAG00000000502(DAZL),ENSBTAG00000000546(TOB1),ENSBTAG00000000613(ELAVL1),ENSBTAG00000000738(DAPK1),ENSBTAG00000000764(GIPC1),ENSBTAG00000000778(HSP90AB1),ENSBTAG00000000782(KDR),ENSBTAG00000000841(LZTS1),ENSBTAG00000000902(OGT),ENSBTAG00000001030(MTMR3),ENSBTAG00…
BP	GO:0010556	regulation of macromolecule biosynthetic process	7.6e-12	4.10632e-10	ENSBTAG00000000009(FOXF1),ENSBTAG00000000013(PRKAA1),ENSBTAG00000000023(RNF2),ENSBTAG00000000031(TRPV4),ENSBTAG00000000039(SIRT7),ENSBTAG00000000040(MAFG),ENSBTAG00000000072(TFB2M),ENSBTAG00000000074(NFIA),ENSBTAG00000000092(HIF1AN),ENSBTAG00000000098(SETDB1),ENSBTAG00000000113(ARHGEF2),ENSBTAG00000000184(EIF2AK3),ENSBTAG00000000201(LTN1),ENSBTAG00000000222(ARID4B),ENSBTAG00000000231(BMPR1A),ENSB…
BP	GO:0043087	regulation of GTPase activity	7.8e-12	4.20271e-10	ENSBTAG00000000147(RIC8B),ENSBTAG00000000152(RANBP2),ENSBTAG00000000210(ARHGAP31),ENSBTAG00000000333(ARHGAP20),ENSBTAG00000000347(RHOG),ENSBTAG00000000490(RTKN),ENSBTAG00000000571(ARHGAP27),ENSBTAG00000000713(AGFG2),ENSBTAG00000000815(EPHA2),ENSBTAG00000000833(TAX1BP3),ENSBTAG00000000897(IQGAP2),ENSBTAG00000000942(SIPA1L2),ENSBTAG00000001029(RASGRP2),ENSBTAG00000001057(ARFGAP3),ENSBTAG00000001173…
BP	GO:0070201	regulation of establishment of protein localization	8e-12	4.29856e-10	ENSBTAG00000000013(PRKAA1),ENSBTAG00000000031(TRPV4),ENSBTAG00000000095(CD274),ENSBTAG00000000231(BMPR1A),ENSBTAG00000000259(CHIA),ENSBTAG00000000264(RFX6),ENSBTAG00000000286(PFKM),ENSBTAG00000000292(TCIRG1),ENSBTAG00000000322(CD2AP),ENSBTAG00000000436(TNFAIP3),ENSBTAG00000000437(FFAR4),ENSBTAG00000000442(RBP4),ENSBTAG00000000484(HYAL2),ENSBTAG00000000511(CNST),ENSBTAG00000000546(TOB1),ENSBTAG000…
BP	GO:0001525	angiogenesis	8.4e-12	4.50106e-10	ENSBTAG00000000076(RECK),ENSBTAG00000000128(FGF18),ENSBTAG00000000184(EIF2AK3),ENSBTAG00000000411(HGS),ENSBTAG00000000483(HYAL1),ENSBTAG00000000653(PPP1R16B),ENSBTAG00000000700(PARVA),ENSBTAG00000000742(AMOTL2),ENSBTAG00000000745(AQP1),ENSBTAG00000000782(KDR),ENSBTAG00000000815(EPHA2),ENSBTAG00000000894(PGK1),ENSBTAG00000001014(MAPK7),ENSBTAG00000001061(PRKCA),ENSBTAG00000001204(JCAD),ENSBTAG0000…
BP	GO:0032386	regulation of intracellular transport	8.8e-12	4.70244e-10	ENSBTAG00000000009(FOXF1),ENSBTAG00000000013(PRKAA1),ENSBTAG00000000231(BMPR1A),ENSBTAG00000000484(HYAL2),ENSBTAG00000000529(BTBD9),ENSBTAG00000000546(TOB1),ENSBTAG00000000764(GIPC1),ENSBTAG00000000854(SEC16B),ENSBTAG00000001009(HCLS1),ENSBTAG00000001015(TM9SF4),ENSBTAG00000001050(LDLRAP1),ENSBTAG00000001332(MYO1C),ENSBTAG00000001398(ATP2A2),ENSBTAG00000001400(AKT2),ENSBTAG00000001592(INSIG1),ENS…
BP	GO:0048193	Golgi vesicle transport	9.2e-12	4.88932e-10	ENSBTAG00000000025(RAB6A),ENSBTAG00000000090(SEC31B),ENSBTAG00000000274(YKT6),ENSBTAG00000000279(RAB26),ENSBTAG00000000511(CNST),ENSBTAG00000000676(DOP1A),ENSBTAG00000000807(TMED3),ENSBTAG00000000810(COPE),ENSBTAG00000000854(SEC16B),ENSBTAG00000000905(RAB6B),ENSBTAG00000001057(ARFGAP3),ENSBTAG00000001224(ATP9B),ENSBTAG00000001394(TMED9),ENSBTAG00000001592(INSIG1),ENSBTAG00000001662(EHD3),ENSBTAG0…
BP	GO:1901342	regulation of vasculature development	9.2e-12	4.88932e-10	ENSBTAG00000000076(RECK),ENSBTAG00000000128(FGF18),ENSBTAG00000000411(HGS),ENSBTAG00000000483(HYAL1),ENSBTAG00000000653(PPP1R16B),ENSBTAG00000000656(NFATC1),ENSBTAG00000000745(AQP1),ENSBTAG00000000782(KDR),ENSBTAG00000000815(EPHA2),ENSBTAG00000000894(PGK1),ENSBTAG00000000919(HEY2),ENSBTAG00000001014(MAPK7),ENSBTAG00000001061(PRKCA),ENSBTAG00000001204(JCAD),ENSBTAG00000001241(ISL1),ENSBTAG00000001…
CC	GO:0012506	vesicle membrane	9.4e-12	4.982e-10	ENSBTAG00000000090(SEC31B),ENSBTAG00000000260(ZNRF2),ENSBTAG00000000274(YKT6),ENSBTAG00000000279(RAB26),ENSBTAG00000000292(TCIRG1),ENSBTAG00000000344(SPACA3),ENSBTAG00000000564(NSG2),ENSBTAG00000000745(AQP1),ENSBTAG00000000764(GIPC1),ENSBTAG00000000795(NMNAT2),ENSBTAG00000000799(ICA1),ENSBTAG00000000807(TMED3),ENSBTAG00000000810(COPE),ENSBTAG00000000854(SEC16B),ENSBTAG00000001057(ARFGAP3),ENSBTAG…
MF	GO:0016787	hydrolase activity	1e-11	5.2856e-10	ENSBTAG00000000025(RAB6A),ENSBTAG00000000029(LYZL6),ENSBTAG00000000033(PHOSPHO1),ENSBTAG00000000039(SIRT7),ENSBTAG00000000062(RASL12),ENSBTAG00000000064(FEN1),ENSBTAG00000000105(RIT1),ENSBTAG00000000120(USP43),ENSBTAG00000000124(DHH),ENSBTAG00000000131(SENP3),ENSBTAG00000000132(EIF4A1),ENSBTAG00000000140(EPHX1),ENSBTAG00000000149(USP40),ENSBTAG00000000199(PDP1),ENSBTAG00000000203(ATP6V1G1),ENSBTA…
BP	GO:0001701	in utero embryonic development	1.1e-11	5.7984e-10	ENSBTAG00000000009(FOXF1),ENSBTAG00000000040(MAFG),ENSBTAG00000000081(COL4A3BP),ENSBTAG00000000182(SPINT2),ENSBTAG00000000231(BMPR1A),ENSBTAG00000000342(PLOD3),ENSBTAG00000000569(HES1),ENSBTAG00000000771(DNAJB6),ENSBTAG00000000816(PRDM1),ENSBTAG00000000836(KRT8),ENSBTAG00000000919(HEY2),ENSBTAG00000001020(AKAP3),ENSBTAG00000001069(TP53),ENSBTAG00000001271(PLG),ENSBTAG00000001545(SLC34A2),ENSBTAG0…
BP	GO:0040007	growth	1.2e-11	6.30843e-10	ENSBTAG00000000016(LTA),ENSBTAG00000000057(THBS3),ENSBTAG00000000231(BMPR1A),ENSBTAG00000000283(CSF1),ENSBTAG00000000396(PIM1),ENSBTAG00000000435(TARBP2),ENSBTAG00000000483(HYAL1),ENSBTAG00000000484(HYAL2),ENSBTAG00000000494(PDE4D),ENSBTAG00000000563(MYD88),ENSBTAG00000000579(NIPBL),ENSBTAG00000000694(TAF10),ENSBTAG00000000778(HSP90AB1),ENSBTAG00000000895(TAF9B),ENSBTAG00000000919(HEY2),ENSBTAG00…
MF	GO:0051020	GTPase binding	1.3e-11	6.81571e-10	ENSBTAG00000000113(ARHGEF2),ENSBTAG00000000146(FARP1),ENSBTAG00000000147(RIC8B),ENSBTAG00000000152(RANBP2),ENSBTAG00000000215(GNB1),ENSBTAG00000000369(EPS8),ENSBTAG00000000460(SYTL2),ENSBTAG00000000490(RTKN),ENSBTAG00000000581(DOCK10),ENSBTAG00000000634(MLPH),ENSBTAG00000000684(ARHGEF10L),ENSBTAG00000000711(NDRG1),ENSBTAG00000000737(DMXL2),ENSBTAG00000000897(IQGAP2),ENSBTAG00000000974(IARS),ENSBT…
BP	GO:0044249	cellular biosynthetic process	1.5e-11	7.82212e-10	ENSBTAG00000000009(FOXF1),ENSBTAG00000000013(PRKAA1),ENSBTAG00000000019(SERINC1),ENSBTAG00000000023(RNF2),ENSBTAG00000000031(TRPV4),ENSBTAG00000000039(SIRT7),ENSBTAG00000000040(MAFG),ENSBTAG00000000042(PYCR1),ENSBTAG00000000054(SNAPC4),ENSBTAG00000000064(FEN1),ENSBTAG00000000065(CRLS1),ENSBTAG00000000072(TFB2M),ENSBTAG00000000074(NFIA),ENSBTAG00000000077(ADSL),ENSBTAG00000000080(GRWD1),ENSBTAG000…
CC	GO:0097458	neuron part	1.5e-11	7.82212e-10	ENSBTAG00000000013(PRKAA1),ENSBTAG00000000088(ALCAM),ENSBTAG00000000109(NPTXR),ENSBTAG00000000113(ARHGEF2),ENSBTAG00000000153(LRFN3),ENSBTAG00000000215(GNB1),ENSBTAG00000000241(STAU1),ENSBTAG00000000253(PTPRF),ENSBTAG00000000265(SYNPR),ENSBTAG00000000279(RAB26),ENSBTAG00000000317(MAPK8IP1),ENSBTAG00000000354(PDE6G),ENSBTAG00000000369(EPS8),ENSBTAG00000000534(PNOC),ENSBTAG00000000540(RNF112),ENSBT…
BP	GO:0044772	mitotic cell cycle phase transition	1.6e-11	8.29909e-10	ENSBTAG00000000039(SIRT7),ENSBTAG00000000369(EPS8),ENSBTAG00000000483(HYAL1),ENSBTAG00000000500(PINX1),ENSBTAG00000000590(POLE),ENSBTAG00000000604(GPNMB),ENSBTAG00000000694(TAF10),ENSBTAG00000000706(ADAMTS1),ENSBTAG00000000841(LZTS1),ENSBTAG00000000986(USH1C),ENSBTAG00000001069(TP53),ENSBTAG00000001424(MSH6),ENSBTAG00000001575(CALM2),ENSBTAG00000001651(SYF2),ENSBTAG00000001717(AURKB),ENSBTAG00000…
BP	GO:0090087	regulation of peptide transport	1.6e-11	8.29909e-10	ENSBTAG00000000013(PRKAA1),ENSBTAG00000000031(TRPV4),ENSBTAG00000000095(CD274),ENSBTAG00000000231(BMPR1A),ENSBTAG00000000259(CHIA),ENSBTAG00000000264(RFX6),ENSBTAG00000000286(PFKM),ENSBTAG00000000292(TCIRG1),ENSBTAG00000000322(CD2AP),ENSBTAG00000000436(TNFAIP3),ENSBTAG00000000437(FFAR4),ENSBTAG00000000442(RBP4),ENSBTAG00000000484(HYAL2),ENSBTAG00000000511(CNST),ENSBTAG00000000546(TOB1),ENSBTAG000…
BP	GO:0044770	cell cycle phase transition	1.7e-11	8.79434e-10	ENSBTAG00000000039(SIRT7),ENSBTAG00000000369(EPS8),ENSBTAG00000000372(TIPIN),ENSBTAG00000000483(HYAL1),ENSBTAG00000000500(PINX1),ENSBTAG00000000590(POLE),ENSBTAG00000000604(GPNMB),ENSBTAG00000000660(FAM83D),ENSBTAG00000000694(TAF10),ENSBTAG00000000706(ADAMTS1),ENSBTAG00000000841(LZTS1),ENSBTAG00000000986(USH1C),ENSBTAG00000001069(TP53),ENSBTAG00000001328(SLBP),ENSBTAG00000001424(MSH6),ENSBTAG0000…
BP	GO:0048514	blood vessel morphogenesis	1.8e-11	9.28695e-10	ENSBTAG00000000009(FOXF1),ENSBTAG00000000076(RECK),ENSBTAG00000000128(FGF18),ENSBTAG00000000184(EIF2AK3),ENSBTAG00000000231(BMPR1A),ENSBTAG00000000411(HGS),ENSBTAG00000000428(BAK1),ENSBTAG00000000483(HYAL1),ENSBTAG00000000569(HES1),ENSBTAG00000000653(PPP1R16B),ENSBTAG00000000700(PARVA),ENSBTAG00000000742(AMOTL2),ENSBTAG00000000745(AQP1),ENSBTAG00000000782(KDR),ENSBTAG00000000815(EPHA2),ENSBTAG000…
BP	GO:0071900	regulation of protein serine/threonine kinase activity	1.9e-11	9.77696e-10	ENSBTAG00000000128(FGF18),ENSBTAG00000000218(MAP2K5),ENSBTAG00000000354(PDE6G),ENSBTAG00000000411(HGS),ENSBTAG00000000436(TNFAIP3),ENSBTAG00000000469(PPP2CA),ENSBTAG00000000484(HYAL2),ENSBTAG00000000570(RET),ENSBTAG00000000599(CCNI),ENSBTAG00000000746(KAT2B),ENSBTAG00000001037(MAP4K2),ENSBTAG00000001083(MAP3K20),ENSBTAG00000001292(LTF),ENSBTAG00000001321(IL1B),ENSBTAG00000001609(MAP2K6),ENSBTAG00…
BP	GO:0051301	cell division	2.1e-11	1.07492e-09	ENSBTAG00000000113(ARHGEF2),ENSBTAG00000000162(ANAPC16),ENSBTAG00000000372(TIPIN),ENSBTAG00000000490(RTKN),ENSBTAG00000000501(KLHL13),ENSBTAG00000000764(GIPC1),ENSBTAG00000000981(KLHDC8B),ENSBTAG00000001137(CLTA),ENSBTAG00000001221(NKX3-1),ENSBTAG00000001321(IL1B),ENSBTAG00000001352(ENTR1),ENSBTAG00000001575(CALM2),ENSBTAG00000001700(CDC42),ENSBTAG00000001717(AURKB),ENSBTAG00000001776(SIRT2),ENSB…
BP	GO:0045765	regulation of angiogenesis	2.1e-11	1.07492e-09	ENSBTAG00000000076(RECK),ENSBTAG00000000128(FGF18),ENSBTAG00000000411(HGS),ENSBTAG00000000483(HYAL1),ENSBTAG00000000653(PPP1R16B),ENSBTAG00000000745(AQP1),ENSBTAG00000000782(KDR),ENSBTAG00000000815(EPHA2),ENSBTAG00000000894(PGK1),ENSBTAG00000001014(MAPK7),ENSBTAG00000001061(PRKCA),ENSBTAG00000001204(JCAD),ENSBTAG00000001241(ISL1),ENSBTAG00000001321(IL1B),ENSBTAG00000001333(PPARG),ENSBTAG000000016…
MF	GO:0004674	protein serine/threonine kinase activity	2.2e-11	1.12021e-09	ENSBTAG00000000005(GRK3),ENSBTAG00000000013(PRKAA1),ENSBTAG00000000056(STRADA),ENSBTAG00000000184(EIF2AK3),ENSBTAG00000000218(MAP2K5),ENSBTAG00000000231(BMPR1A),ENSBTAG00000000396(PIM1),ENSBTAG00000000582(LY6G6E),ENSBTAG00000000626(STK32A),ENSBTAG00000000696(ILK),ENSBTAG00000000738(DAPK1),ENSBTAG00000000785(PASK),ENSBTAG00000000965(TNNI3K),ENSBTAG00000001014(MAPK7),ENSBTAG00000001017(SLK),ENSBTAG…
BP	GO:0051223	regulation of protein transport	2.2e-11	1.12021e-09	ENSBTAG00000000013(PRKAA1),ENSBTAG00000000031(TRPV4),ENSBTAG00000000095(CD274),ENSBTAG00000000231(BMPR1A),ENSBTAG00000000259(CHIA),ENSBTAG00000000264(RFX6),ENSBTAG00000000286(PFKM),ENSBTAG00000000292(TCIRG1),ENSBTAG00000000322(CD2AP),ENSBTAG00000000436(TNFAIP3),ENSBTAG00000000437(FFAR4),ENSBTAG00000000442(RBP4),ENSBTAG00000000484(HYAL2),ENSBTAG00000000511(CNST),ENSBTAG00000000546(TOB1),ENSBTAG000…
BP	GO:0006979	response to oxidative stress	2.3e-11	1.16808e-09	ENSBTAG00000000013(PRKAA1),ENSBTAG00000000042(PYCR1),ENSBTAG00000000436(TNFAIP3),ENSBTAG00000000483(HYAL1),ENSBTAG00000000484(HYAL2),ENSBTAG00000000540(RNF112),ENSBTAG00000000640(SELENOS),ENSBTAG00000000738(DAPK1),ENSBTAG00000000745(AQP1),ENSBTAG00000000837(PARP1),ENSBTAG00000001014(MAPK7),ENSBTAG00000001069(TP53),ENSBTAG00000001096(PRKRA),ENSBTAG00000001306(FXN),ENSBTAG00000001398(ATP2A2),ENSBTA…
MF	GO:0016788	hydrolase activity, acting on ester bonds	2.4e-11	1.21569e-09	ENSBTAG00000000033(PHOSPHO1),ENSBTAG00000000064(FEN1),ENSBTAG00000000199(PDP1),ENSBTAG00000000223(PPM1B),ENSBTAG00000000253(PTPRF),ENSBTAG00000000267(SMG6),ENSBTAG00000000354(PDE6G),ENSBTAG00000000365(TDP2),ENSBTAG00000000371(DIS3L),ENSBTAG00000000445(PDE6C),ENSBTAG00000000469(PPP2CA),ENSBTAG00000000494(PDE4D),ENSBTAG00000000532(EXO5),ENSBTAG00000000578(ABHD16A),ENSBTAG00000000590(POLE),ENSBTAG00…
CC	GO:0044456	synapse part	2.7e-11	1.3641e-09	ENSBTAG00000000113(ARHGEF2),ENSBTAG00000000153(LRFN3),ENSBTAG00000000265(SYNPR),ENSBTAG00000000279(RAB26),ENSBTAG00000000369(EPS8),ENSBTAG00000000415(ERBIN),ENSBTAG00000000534(PNOC),ENSBTAG00000000540(RNF112),ENSBTAG00000000613(ELAVL1),ENSBTAG00000000737(DMXL2),ENSBTAG00000000764(GIPC1),ENSBTAG00000000791(CALY),ENSBTAG00000000799(ICA1),ENSBTAG00000000806(ATAD1),ENSBTAG00000000817(SYNJ2),ENSBTAG00…
BP	GO:0006914	autophagy	3e-11	1.50783e-09	ENSBTAG00000000013(PRKAA1),ENSBTAG00000000292(TCIRG1),ENSBTAG00000000510(ATG101),ENSBTAG00000000738(DAPK1),ENSBTAG00000000782(KDR),ENSBTAG00000000841(LZTS1),ENSBTAG00000000878(RB1CC1),ENSBTAG00000001030(MTMR3),ENSBTAG00000001069(TP53),ENSBTAG00000001192(STX12),ENSBTAG00000001303(HSPB8),ENSBTAG00000001320(VPS16),ENSBTAG00000001548(UBQLN4),ENSBTAG00000001607(TMEM41B),ENSBTAG00000001632(NBR1),ENSBTA…
BP	GO:0061919	process utilizing autophagic mechanism	3e-11	1.50783e-09	ENSBTAG00000000013(PRKAA1),ENSBTAG00000000292(TCIRG1),ENSBTAG00000000510(ATG101),ENSBTAG00000000738(DAPK1),ENSBTAG00000000782(KDR),ENSBTAG00000000841(LZTS1),ENSBTAG00000000878(RB1CC1),ENSBTAG00000001030(MTMR3),ENSBTAG00000001069(TP53),ENSBTAG00000001192(STX12),ENSBTAG00000001303(HSPB8),ENSBTAG00000001320(VPS16),ENSBTAG00000001548(UBQLN4),ENSBTAG00000001607(TMEM41B),ENSBTAG00000001632(NBR1),ENSBTA…
BP	GO:0034599	cellular response to oxidative stress	3.2e-11	1.60008e-09	ENSBTAG00000000013(PRKAA1),ENSBTAG00000000042(PYCR1),ENSBTAG00000000436(TNFAIP3),ENSBTAG00000000540(RNF112),ENSBTAG00000000640(SELENOS),ENSBTAG00000000738(DAPK1),ENSBTAG00000000745(AQP1),ENSBTAG00000000837(PARP1),ENSBTAG00000001014(MAPK7),ENSBTAG00000001069(TP53),ENSBTAG00000001096(PRKRA),ENSBTAG00000001306(FXN),ENSBTAG00000001398(ATP2A2),ENSBTAG00000001776(SIRT2),ENSBTAG00000001795(LONP1),ENSBTA…
CC	GO:0099568	cytoplasmic region	3.2e-11	1.60008e-09	ENSBTAG00000000137(FRYL),ENSBTAG00000000347(RHOG),ENSBTAG00000000369(EPS8),ENSBTAG00000000490(RTKN),ENSBTAG00000000634(MLPH),ENSBTAG00000000764(GIPC1),ENSBTAG00000000888(SPTA1),ENSBTAG00000001137(CLTA),ENSBTAG00000001182(SEPT7),ENSBTAG00000001209(PHLDB2),ENSBTAG00000001243(AP3M2),ENSBTAG00000001400(AKT2),ENSBTAG00000001407(AP3S2),ENSBTAG00000001420(ABHD12),ENSBTAG00000001585(WIPF1),ENSBTAG0000000…
BP	GO:0032989	cellular component morphogenesis	3.6e-11	1.79088e-09	ENSBTAG00000000056(STRADA),ENSBTAG00000000081(COL4A3BP),ENSBTAG00000000088(ALCAM),ENSBTAG00000000113(ARHGEF2),ENSBTAG00000000137(FRYL),ENSBTAG00000000182(SPINT2),ENSBTAG00000000342(PLOD3),ENSBTAG00000000347(RHOG),ENSBTAG00000000369(EPS8),ENSBTAG00000000541(NKX2-1),ENSBTAG00000000569(HES1),ENSBTAG00000000570(RET),ENSBTAG00000000588(CHODL),ENSBTAG00000000696(ILK),ENSBTAG00000000700(PARVA),ENSBTAG00…
BP	GO:0030099	myeloid cell differentiation	3.6e-11	1.79088e-09	ENSBTAG00000000026(VPS33B),ENSBTAG00000000283(CSF1),ENSBTAG00000000292(TCIRG1),ENSBTAG00000000476(THPO),ENSBTAG00000000815(EPHA2),ENSBTAG00000000842(UBASH3B),ENSBTAG00000001009(HCLS1),ENSBTAG00000001292(LTF),ENSBTAG00000001333(PPARG),ENSBTAG00000001511(BCL6),ENSBTAG00000001567(LRRK1),ENSBTAG00000001570(CSF2),ENSBTAG00000002048(PTPN11),ENSBTAG00000002072(ERCC2),ENSBTAG00000002150(IL17A),ENSBTAG000…
BP	GO:0048699	generation of neurons	3.7e-11	1.83594e-09	ENSBTAG00000000056(STRADA),ENSBTAG00000000088(ALCAM),ENSBTAG00000000109(NPTXR),ENSBTAG00000000113(ARHGEF2),ENSBTAG00000000137(FRYL),ENSBTAG00000000163(DDIT4),ENSBTAG00000000164(GNRH1),ENSBTAG00000000205(MMD),ENSBTAG00000000231(BMPR1A),ENSBTAG00000000253(PTPRF),ENSBTAG00000000283(CSF1),ENSBTAG00000000305(LMO4),ENSBTAG00000000365(TDP2),ENSBTAG00000000413(NRTN),ENSBTAG00000000445(PDE6C),ENSBTAG00000…
BP	GO:0050804	modulation of chemical synaptic transmission	4.1e-11	2.02409e-09	ENSBTAG00000000240(AKAP7),ENSBTAG00000000279(RAB26),ENSBTAG00000000764(GIPC1),ENSBTAG00000000806(ATAD1),ENSBTAG00000000970(ASIC1),ENSBTAG00000001067(GRM2),ENSBTAG00000001075(CALB2),ENSBTAG00000001279(MPP2),ENSBTAG00000001321(IL1B),ENSBTAG00000001398(ATP2A2),ENSBTAG00000001404(CACNG3),ENSBTAG00000001675(ITPKA),ENSBTAG00000001801(SYT4),ENSBTAG00000001918(STXBP5L),ENSBTAG00000002075(MME),ENSBTAG0000…
BP	GO:0061061	muscle structure development	4.1e-11	2.02409e-09	ENSBTAG00000000009(FOXF1),ENSBTAG00000000013(PRKAA1),ENSBTAG00000000092(HIF1AN),ENSBTAG00000000231(BMPR1A),ENSBTAG00000000329(MEGF10),ENSBTAG00000000396(PIM1),ENSBTAG00000000435(TARBP2),ENSBTAG00000000440(HSPB2),ENSBTAG00000000507(NR4A1),ENSBTAG00000000569(HES1),ENSBTAG00000000656(NFATC1),ENSBTAG00000000731(WFIKKN2),ENSBTAG00000000919(HEY2),ENSBTAG00000000992(BMP10),ENSBTAG00000001024(ARID1A),ENS…
BP	GO:0051130	positive regulation of cellular component organization	4.2e-11	2.06821e-09	ENSBTAG00000000013(PRKAA1),ENSBTAG00000000064(FEN1),ENSBTAG00000000098(SETDB1),ENSBTAG00000000271(MNS1),ENSBTAG00000000369(EPS8),ENSBTAG00000000483(HYAL1),ENSBTAG00000000502(DAZL),ENSBTAG00000000504(GTF2B),ENSBTAG00000000522(AHSG),ENSBTAG00000000570(RET),ENSBTAG00000000579(NIPBL),ENSBTAG00000000588(CHODL),ENSBTAG00000000684(ARHGEF10L),ENSBTAG00000000730(GCG),ENSBTAG00000000782(KDR),ENSBTAG0000000…
BP	GO:0002684	positive regulation of immune system process	4.4e-11	2.15578e-09	ENSBTAG00000000009(FOXF1),ENSBTAG00000000016(LTA),ENSBTAG00000000031(TRPV4),ENSBTAG00000000095(CD274),ENSBTAG00000000130(TNFSF13),ENSBTAG00000000283(CSF1),ENSBTAG00000000306(ITK),ENSBTAG00000000377(BMX),ENSBTAG00000000415(ERBIN),ENSBTAG00000000436(TNFAIP3),ENSBTAG00000000476(THPO),ENSBTAG00000000494(PDE4D),ENSBTAG00000000563(MYD88),ENSBTAG00000000569(HES1),ENSBTAG00000000630(LSM14A),ENSBTAG000000…
CC	GO:0005819	spindle	4.4e-11	2.15578e-09	ENSBTAG00000000218(MAP2K5),ENSBTAG00000000225(POLB),ENSBTAG00000000469(PPP2CA),ENSBTAG00000000500(PINX1),ENSBTAG00000000650(TUBGCP6),ENSBTAG00000000660(FAM83D),ENSBTAG00000000687(POC1B),ENSBTAG00000000752(SGO1),ENSBTAG00000000828(CAPN6),ENSBTAG00000001137(CLTA),ENSBTAG00000001387(WDR73),ENSBTAG00000001463(TNKS),ENSBTAG00000001575(CALM2),ENSBTAG00000001631(KIFC1),ENSBTAG00000001700(CDC42),ENSBTAG0…
CC	GO:0030659	cytoplasmic vesicle membrane	4.6e-11	2.24811e-09	ENSBTAG00000000090(SEC31B),ENSBTAG00000000260(ZNRF2),ENSBTAG00000000274(YKT6),ENSBTAG00000000279(RAB26),ENSBTAG00000000292(TCIRG1),ENSBTAG00000000344(SPACA3),ENSBTAG00000000564(NSG2),ENSBTAG00000000745(AQP1),ENSBTAG00000000795(NMNAT2),ENSBTAG00000000799(ICA1),ENSBTAG00000000807(TMED3),ENSBTAG00000000810(COPE),ENSBTAG00000000854(SEC16B),ENSBTAG00000001057(ARFGAP3),ENSBTAG00000001074(SAYSD1),ENSBTA…
BP	GO:0051603	proteolysis involved in cellular protein catabolic process	4.8e-11	2.33412e-09	ENSBTAG00000000010(UBL7),ENSBTAG00000000067(SDF2L1),ENSBTAG00000000120(USP43),ENSBTAG00000000149(USP40),ENSBTAG00000000201(LTN1),ENSBTAG00000000251(ALAD),ENSBTAG00000000320(UBAP1),ENSBTAG00000000436(TNFAIP3),ENSBTAG00000000640(SELENOS),ENSBTAG00000000720(CTSL),ENSBTAG00000000725(USP42),ENSBTAG00000000764(GIPC1),ENSBTAG00000000778(HSP90AB1),ENSBTAG00000000856(FBXL6),ENSBTAG00000000902(OGT),ENSBTAG…
BP	GO:0044262	cellular carbohydrate metabolic process	4.8e-11	2.33412e-09	ENSBTAG00000000111(UGP2),ENSBTAG00000000152(RANBP2),ENSBTAG00000000163(DDIT4),ENSBTAG00000000286(PFKM),ENSBTAG00000000301,ENSBTAG00000000545(PPP4R3B),ENSBTAG00000000704(GUSB),ENSBTAG00000000730(GCG),ENSBTAG00000000746(KAT2B),ENSBTAG00000000785(PASK),ENSBTAG00000000817(SYNJ2),ENSBTAG00000000878(RB1CC1),ENSBTAG00000000902(OGT),ENSBTAG00000001032(PYGM),ENSBTAG00000001069(TP53),ENSBTAG00000001354(INP…
BP	GO:0030155	regulation of cell adhesion	5.2e-11	2.52232e-09	ENSBTAG00000000009(FOXF1),ENSBTAG00000000026(VPS33B),ENSBTAG00000000031(TRPV4),ENSBTAG00000000087(HSD17B12),ENSBTAG00000000095(CD274),ENSBTAG00000000182(SPINT2),ENSBTAG00000000283(CSF1),ENSBTAG00000000317(MAPK8IP1),ENSBTAG00000000483(HYAL1),ENSBTAG00000000569(HES1),ENSBTAG00000000570(RET),ENSBTAG00000000603(JAM2),ENSBTAG00000000604(GPNMB),ENSBTAG00000000782(KDR),ENSBTAG00000000815(EPHA2),ENSBTAG0…
BP	GO:0009790	embryo development	5.4e-11	2.61282e-09	ENSBTAG00000000009(FOXF1),ENSBTAG00000000023(RNF2),ENSBTAG00000000040(MAFG),ENSBTAG00000000076(RECK),ENSBTAG00000000081(COL4A3BP),ENSBTAG00000000182(SPINT2),ENSBTAG00000000231(BMPR1A),ENSBTAG00000000305(LMO4),ENSBTAG00000000342(PLOD3),ENSBTAG00000000422(TSHZ1),ENSBTAG00000000483(HYAL1),ENSBTAG00000000540(RNF112),ENSBTAG00000000569(HES1),ENSBTAG00000000570(RET),ENSBTAG00000000579(NIPBL),ENSBTAG000…
BP	GO:0051347	positive regulation of transferase activity	5.6e-11	2.70287e-09	ENSBTAG00000000056(STRADA),ENSBTAG00000000128(FGF18),ENSBTAG00000000152(RANBP2),ENSBTAG00000000205(MMD),ENSBTAG00000000218(MAP2K5),ENSBTAG00000000283(CSF1),ENSBTAG00000000305(LMO4),ENSBTAG00000000354(PDE6G),ENSBTAG00000000469(PPP2CA),ENSBTAG00000000570(RET),ENSBTAG00000000730(GCG),ENSBTAG00000000778(HSP90AB1),ENSBTAG00000000962(STAP1),ENSBTAG00000001017(SLK),ENSBTAG00000001037(MAP4K2),ENSBTAG0000…
BP	GO:0050900	leukocyte migration	6e-11	2.88163e-09	ENSBTAG00000000031(TRPV4),ENSBTAG00000000283(CSF1),ENSBTAG00000000369(EPS8),ENSBTAG00000000494(PDE4D),ENSBTAG00000000563(MYD88),ENSBTAG00000000962(STAP1),ENSBTAG00000001191(CCL17),ENSBTAG00000001271(PLG),ENSBTAG00000001321(IL1B),ENSBTAG00000001557(CCL28),ENSBTAG00000001700(CDC42),ENSBTAG00000001725(CXCL10),ENSBTAG00000001815(ARHGEF5),ENSBTAG00000001987(SWAP70),ENSBTAG00000002080(CCN3),ENSBTAG0000…
BP	GO:0044092	negative regulation of molecular function	6e-11	2.88163e-09	ENSBTAG00000000023(RNF2),ENSBTAG00000000073(LRPAP1),ENSBTAG00000000076(RECK),ENSBTAG00000000182(SPINT2),ENSBTAG00000000253(PTPRF),ENSBTAG00000000396(PIM1),ENSBTAG00000000415(ERBIN),ENSBTAG00000000436(TNFAIP3),ENSBTAG00000000460(SYTL2),ENSBTAG00000000484(HYAL2),ENSBTAG00000000490(RTKN),ENSBTAG00000000500(PINX1),ENSBTAG00000000507(NR4A1),ENSBTAG00000000511(CNST),ENSBTAG00000000522(AHSG),ENSBTAG0000…
BP	GO:2000112	regulation of cellular macromolecule biosynthetic process	6.1e-11	2.92244e-09	ENSBTAG00000000009(FOXF1),ENSBTAG00000000013(PRKAA1),ENSBTAG00000000023(RNF2),ENSBTAG00000000031(TRPV4),ENSBTAG00000000039(SIRT7),ENSBTAG00000000040(MAFG),ENSBTAG00000000072(TFB2M),ENSBTAG00000000074(NFIA),ENSBTAG00000000092(HIF1AN),ENSBTAG00000000098(SETDB1),ENSBTAG00000000113(ARHGEF2),ENSBTAG00000000184(EIF2AK3),ENSBTAG00000000201(LTN1),ENSBTAG00000000222(ARID4B),ENSBTAG00000000231(BMPR1A),ENSB…
BP	GO:0051129	negative regulation of cellular component organization	6.5e-11	3.10643e-09	ENSBTAG00000000073(LRPAP1),ENSBTAG00000000113(ARHGEF2),ENSBTAG00000000267(SMG6),ENSBTAG00000000305(LMO4),ENSBTAG00000000369(EPS8),ENSBTAG00000000500(PINX1),ENSBTAG00000000625(SMAD6),ENSBTAG00000000746(KAT2B),ENSBTAG00000000771(DNAJB6),ENSBTAG00000000919(HEY2),ENSBTAG00000000962(STAP1),ENSBTAG00000001069(TP53),ENSBTAG00000001209(PHLDB2),ENSBTAG00000001225(RBM14),ENSBTAG00000001306(FXN),ENSBTAG0000…
BP	GO:0090066	regulation of anatomical structure size	7e-11	3.32902e-09	ENSBTAG00000000342(PLOD3),ENSBTAG00000000369(EPS8),ENSBTAG00000000496(SLC12A8),ENSBTAG00000000570(RET),ENSBTAG00000000745(AQP1),ENSBTAG00000000871(TRIM27),ENSBTAG00000000878(RB1CC1),ENSBTAG00000000897(IQGAP2),ENSBTAG00000000900(LRRC8C),ENSBTAG00000001009(HCLS1),ENSBTAG00000001131(SLC12A9),ENSBTAG00000001585(WIPF1),ENSBTAG00000001657(PICALM),ENSBTAG00000001941(SEMA4D),ENSBTAG00000001961(MAP1B),ENS…
BP	GO:1901698	response to nitrogen compound	7e-11	3.32902e-09	ENSBTAG00000000013(PRKAA1),ENSBTAG00000000031(TRPV4),ENSBTAG00000000067(SDF2L1),ENSBTAG00000000113(ARHGEF2),ENSBTAG00000000215(GNB1),ENSBTAG00000000415(ERBIN),ENSBTAG00000000435(TARBP2),ENSBTAG00000000436(TNFAIP3),ENSBTAG00000000438(GNRHR),ENSBTAG00000000494(PDE4D),ENSBTAG00000000507(NR4A1),ENSBTAG00000000563(MYD88),ENSBTAG00000000582(LY6G6E),ENSBTAG00000000640(SELENOS),ENSBTAG00000000745(AQP1),E…
MF	GO:0008047	enzyme activator activity	7.5e-11	3.55811e-09	ENSBTAG00000000056(STRADA),ENSBTAG00000000147(RIC8B),ENSBTAG00000000152(RANBP2),ENSBTAG00000000210(ARHGAP31),ENSBTAG00000000333(ARHGAP20),ENSBTAG00000000571(ARHGAP27),ENSBTAG00000000684(ARHGEF10L),ENSBTAG00000000713(AGFG2),ENSBTAG00000000754(PPP2R5A),ENSBTAG00000000771(DNAJB6),ENSBTAG00000000942(SIPA1L2),ENSBTAG00000001057(ARFGAP3),ENSBTAG00000001096(PRKRA),ENSBTAG00000001221(NKX3-1),ENSBTAG00000…
BP	GO:0030335	positive regulation of cell migration	7.8e-11	3.69143e-09	ENSBTAG00000000009(FOXF1),ENSBTAG00000000031(TRPV4),ENSBTAG00000000078(GLIPR2),ENSBTAG00000000113(ARHGEF2),ENSBTAG00000000128(FGF18),ENSBTAG00000000283(CSF1),ENSBTAG00000000483(HYAL1),ENSBTAG00000000570(RET),ENSBTAG00000000579(NIPBL),ENSBTAG00000000604(GPNMB),ENSBTAG00000000706(ADAMTS1),ENSBTAG00000000745(AQP1),ENSBTAG00000000782(KDR),ENSBTAG00000001061(PRKCA),ENSBTAG00000001204(JCAD),ENSBTAG0000…
BP	GO:0040008	regulation of growth	8.5e-11	4.01295e-09	ENSBTAG00000000016(LTA),ENSBTAG00000000231(BMPR1A),ENSBTAG00000000283(CSF1),ENSBTAG00000000396(PIM1),ENSBTAG00000000483(HYAL1),ENSBTAG00000000484(HYAL2),ENSBTAG00000000563(MYD88),ENSBTAG00000000579(NIPBL),ENSBTAG00000000895(TAF9B),ENSBTAG00000000919(HEY2),ENSBTAG00000000957(CDKN2AIP),ENSBTAG00000000992(BMP10),ENSBTAG00000001044(SUPV3L1),ENSBTAG00000001069(TP53),ENSBTAG00000001306(FXN),ENSBTAG0000…
BP	GO:0046903	secretion	1e-10	4.70969e-09	ENSBTAG00000000009(FOXF1),ENSBTAG00000000021(WASHC3),ENSBTAG00000000026(VPS33B),ENSBTAG00000000031(TRPV4),ENSBTAG00000000095(CD274),ENSBTAG00000000259(CHIA),ENSBTAG00000000264(RFX6),ENSBTAG00000000274(YKT6),ENSBTAG00000000279(RAB26),ENSBTAG00000000286(PFKM),ENSBTAG00000000292(TCIRG1),ENSBTAG00000000322(CD2AP),ENSBTAG00000000411(HGS),ENSBTAG00000000436(TNFAIP3),ENSBTAG00000000437(FFAR4),ENSBTAG000…
BP	GO:0097435	supramolecular fiber organization	1.1e-10	5.16814e-09	ENSBTAG00000000021(WASHC3),ENSBTAG00000000026(VPS33B),ENSBTAG00000000031(TRPV4),ENSBTAG00000000113(ARHGEF2),ENSBTAG00000000322(CD2AP),ENSBTAG00000000342(PLOD3),ENSBTAG00000000347(RHOG),ENSBTAG00000000369(EPS8),ENSBTAG00000000619(KRT74),ENSBTAG00000000650(TUBGCP6),ENSBTAG00000000684(ARHGEF10L),ENSBTAG00000000771(DNAJB6),ENSBTAG00000000778(HSP90AB1),ENSBTAG00000000838(CCDC88C),ENSBTAG00000000871(TR…
MF	GO:0044389	ubiquitin-like protein ligase binding	1.2e-10	5.61087e-09	ENSBTAG00000000411(HGS),ENSBTAG00000000625(SMAD6),ENSBTAG00000000753(PIAS4),ENSBTAG00000000778(HSP90AB1),ENSBTAG00000001060(CXCR4),ENSBTAG00000001069(TP53),ENSBTAG00000001071(WRAP53),ENSBTAG00000001107(CACYBP),ENSBTAG00000002203(NDUFS2),ENSBTAG00000002216(MYOD1),ENSBTAG00000002296(TMEM173),ENSBTAG00000002315(RNF34),ENSBTAG00000002658(STAM),ENSBTAG00000002808(PSMA3),ENSBTAG00000003012(TRAF1),ENSBT…
BP	GO:0016049	cell growth	1.2e-10	5.61087e-09	ENSBTAG00000000483(HYAL1),ENSBTAG00000000484(HYAL2),ENSBTAG00000000778(HSP90AB1),ENSBTAG00000000895(TAF9B),ENSBTAG00000000957(CDKN2AIP),ENSBTAG00000000992(BMP10),ENSBTAG00000001044(SUPV3L1),ENSBTAG00000001069(TP53),ENSBTAG00000001306(FXN),ENSBTAG00000001511(BCL6),ENSBTAG00000001801(SYT4),ENSBTAG00000001835(GJA1),ENSBTAG00000001866(EMX1),ENSBTAG00000001870(CPNE6),ENSBTAG00000001941(SEMA4D),ENSBTAG…
BP	GO:0001816	cytokine production	1.3e-10	6.04935e-09	ENSBTAG00000000016(LTA),ENSBTAG00000000031(TRPV4),ENSBTAG00000000095(CD274),ENSBTAG00000000113(ARHGEF2),ENSBTAG00000000184(EIF2AK3),ENSBTAG00000000223(PPM1B),ENSBTAG00000000259(CHIA),ENSBTAG00000000273(IL5RA),ENSBTAG00000000292(TCIRG1),ENSBTAG00000000306(ITK),ENSBTAG00000000322(CD2AP),ENSBTAG00000000415(ERBIN),ENSBTAG00000000436(TNFAIP3),ENSBTAG00000000437(FFAR4),ENSBTAG00000000484(HYAL2),ENSBTAG…
BP	GO:0042326	negative regulation of phosphorylation	1.3e-10	6.04935e-09	ENSBTAG00000000163(DDIT4),ENSBTAG00000000428(BAK1),ENSBTAG00000000436(TNFAIP3),ENSBTAG00000000484(HYAL2),ENSBTAG00000000494(PDE4D),ENSBTAG00000000625(SMAD6),ENSBTAG00000000746(KAT2B),ENSBTAG00000000754(PPP2R5A),ENSBTAG00000000842(UBASH3B),ENSBTAG00000000843(NDRG2),ENSBTAG00000000871(TRIM27),ENSBTAG00000000962(STAP1),ENSBTAG00000001321(IL1B),ENSBTAG00000001567(LRRK1),ENSBTAG00000001729(DUSP10),ENS…
BP	GO:0071396	cellular response to lipid	1.6e-10	7.42759e-09	ENSBTAG00000000013(PRKAA1),ENSBTAG00000000095(CD274),ENSBTAG00000000163(DDIT4),ENSBTAG00000000215(GNB1),ENSBTAG00000000396(PIM1),ENSBTAG00000000436(TNFAIP3),ENSBTAG00000000494(PDE4D),ENSBTAG00000000507(NR4A1),ENSBTAG00000000563(MYD88),ENSBTAG00000000570(RET),ENSBTAG00000000602(RXRB),ENSBTAG00000000640(SELENOS),ENSBTAG00000000745(AQP1),ENSBTAG00000000829(SHPK),ENSBTAG00000000962(STAP1),ENSBTAG0000…
MF	GO:0031625	ubiquitin protein ligase binding	1.7e-10	7.85432e-09	ENSBTAG00000000625(SMAD6),ENSBTAG00000000753(PIAS4),ENSBTAG00000000778(HSP90AB1),ENSBTAG00000001060(CXCR4),ENSBTAG00000001069(TP53),ENSBTAG00000001071(WRAP53),ENSBTAG00000001107(CACYBP),ENSBTAG00000002203(NDUFS2),ENSBTAG00000002216(MYOD1),ENSBTAG00000002296(TMEM173),ENSBTAG00000002315(RNF34),ENSBTAG00000002808(PSMA3),ENSBTAG00000003012(TRAF1),ENSBTAG00000003147(JAK1),ENSBTAG00000003229(RPL23),ENS…
BP	GO:0005975	carbohydrate metabolic process	1.7e-10	7.85432e-09	ENSBTAG00000000013(PRKAA1),ENSBTAG00000000111(UGP2),ENSBTAG00000000134(MPDU1),ENSBTAG00000000152(RANBP2),ENSBTAG00000000163(DDIT4),ENSBTAG00000000259(CHIA),ENSBTAG00000000286(PFKM),ENSBTAG00000000287(GNPDA2),ENSBTAG00000000301,ENSBTAG00000000442(RBP4),ENSBTAG00000000483(HYAL1),ENSBTAG00000000484(HYAL2),ENSBTAG00000000497(AKR1A1),ENSBTAG00000000545(PPP4R3B),ENSBTAG00000000679(PGM3),ENSBTAG00000000…
BP	GO:0001775	cell activation	2e-10	9.21848e-09	ENSBTAG00000000009(FOXF1),ENSBTAG00000000026(VPS33B),ENSBTAG00000000095(CD274),ENSBTAG00000000130(TNFSF13),ENSBTAG00000000292(TCIRG1),ENSBTAG00000000296(IMPDH1),ENSBTAG00000000305(LMO4),ENSBTAG00000000306(ITK),ENSBTAG00000000317(MAPK8IP1),ENSBTAG00000000329(MEGF10),ENSBTAG00000000428(BAK1),ENSBTAG00000000436(TNFAIP3),ENSBTAG00000000484(HYAL2),ENSBTAG00000000563(MYD88),ENSBTAG00000000569(HES1),ENS…
BP	GO:0010498	proteasomal protein catabolic process	2.1e-10	9.65652e-09	ENSBTAG00000000067(SDF2L1),ENSBTAG00000000201(LTN1),ENSBTAG00000000251(ALAD),ENSBTAG00000000640(SELENOS),ENSBTAG00000000764(GIPC1),ENSBTAG00000000778(HSP90AB1),ENSBTAG00000000856(FBXL6),ENSBTAG00000000902(OGT),ENSBTAG00000000911(UBE2H),ENSBTAG00000000990(PSMA2),ENSBTAG00000001503(TRIM72),ENSBTAG00000001548(UBQLN4),ENSBTAG00000001776(SIRT2),ENSBTAG00000001926(RAD23B),ENSBTAG00000002033(UBXN2A),ENS…
BP	GO:0030182	neuron differentiation	2.2e-10	1.00925e-08	ENSBTAG00000000056(STRADA),ENSBTAG00000000088(ALCAM),ENSBTAG00000000109(NPTXR),ENSBTAG00000000113(ARHGEF2),ENSBTAG00000000137(FRYL),ENSBTAG00000000163(DDIT4),ENSBTAG00000000205(MMD),ENSBTAG00000000253(PTPRF),ENSBTAG00000000305(LMO4),ENSBTAG00000000365(TDP2),ENSBTAG00000000413(NRTN),ENSBTAG00000000445(PDE6C),ENSBTAG00000000540(RNF112),ENSBTAG00000000541(NKX2-1),ENSBTAG00000000569(HES1),ENSBTAG0000…
BP	GO:0006897	endocytosis	2.3e-10	1.05017e-08	ENSBTAG00000000005(GRK3),ENSBTAG00000000073(LRPAP1),ENSBTAG00000000329(MEGF10),ENSBTAG00000000522(AHSG),ENSBTAG00000000529(BTBD9),ENSBTAG00000000597(TMPRSS15),ENSBTAG00000000704(GUSB),ENSBTAG00000000736(LRP8),ENSBTAG00000000791(CALY),ENSBTAG00000000806(ATAD1),ENSBTAG00000000962(STAP1),ENSBTAG00000001015(TM9SF4),ENSBTAG00000001050(LDLRAP1),ENSBTAG00000001137(CLTA),ENSBTAG00000001139(ACHE),ENSBTAG0…
CC	GO:0044430	cytoskeletal part	2.3e-10	1.05017e-08	ENSBTAG00000000049(CCDC77),ENSBTAG00000000113(ARHGEF2),ENSBTAG00000000147(RIC8B),ENSBTAG00000000218(MAP2K5),ENSBTAG00000000225(POLB),ENSBTAG00000000271(MNS1),ENSBTAG00000000322(CD2AP),ENSBTAG00000000371(DIS3L),ENSBTAG00000000400(KRT85),ENSBTAG00000000458(DYNC1LI2),ENSBTAG00000000462(CCDC102A),ENSBTAG00000000469(PPP2CA),ENSBTAG00000000490(RTKN),ENSBTAG00000000494(PDE4D),ENSBTAG00000000500(PINX1),E…
BP	GO:0060326	cell chemotaxis	2.4e-10	1.09071e-08	ENSBTAG00000000031(TRPV4),ENSBTAG00000000128(FGF18),ENSBTAG00000000283(CSF1),ENSBTAG00000000347(RHOG),ENSBTAG00000000494(PDE4D),ENSBTAG00000000700(PARVA),ENSBTAG00000000782(KDR),ENSBTAG00000000815(EPHA2),ENSBTAG00000000962(STAP1),ENSBTAG00000001060(CXCR4),ENSBTAG00000001191(CCL17),ENSBTAG00000001321(IL1B),ENSBTAG00000001557(CCL28),ENSBTAG00000001725(CXCL10),ENSBTAG00000001815(ARHGEF5),ENSBTAG0000…
BP	GO:0050865	regulation of cell activation	2.4e-10	1.09071e-08	ENSBTAG00000000009(FOXF1),ENSBTAG00000000026(VPS33B),ENSBTAG00000000095(CD274),ENSBTAG00000000130(TNFSF13),ENSBTAG00000000305(LMO4),ENSBTAG00000000317(MAPK8IP1),ENSBTAG00000000436(TNFAIP3),ENSBTAG00000000563(MYD88),ENSBTAG00000000569(HES1),ENSBTAG00000000604(GPNMB),ENSBTAG00000000816(PRDM1),ENSBTAG00000000829(SHPK),ENSBTAG00000000842(UBASH3B),ENSBTAG00000000888(SPTA1),ENSBTAG00000000892(CGAS),ENS…
BP	GO:0009725	response to hormone	2.5e-10	1.13087e-08	ENSBTAG00000000013(PRKAA1),ENSBTAG00000000031(TRPV4),ENSBTAG00000000163(DDIT4),ENSBTAG00000000164(GNRH1),ENSBTAG00000000215(GNB1),ENSBTAG00000000438(GNRHR),ENSBTAG00000000507(NR4A1),ENSBTAG00000000541(NKX2-1),ENSBTAG00000000602(RXRB),ENSBTAG00000000720(CTSL),ENSBTAG00000000745(AQP1),ENSBTAG00000000746(KAT2B),ENSBTAG00000000837(PARP1),ENSBTAG00000000902(OGT),ENSBTAG00000000985(RAB10),ENSBTAG000000…
BP	GO:0002694	regulation of leukocyte activation	2.5e-10	1.13087e-08	ENSBTAG00000000009(FOXF1),ENSBTAG00000000095(CD274),ENSBTAG00000000130(TNFSF13),ENSBTAG00000000317(MAPK8IP1),ENSBTAG00000000436(TNFAIP3),ENSBTAG00000000563(MYD88),ENSBTAG00000000569(HES1),ENSBTAG00000000604(GPNMB),ENSBTAG00000000816(PRDM1),ENSBTAG00000000829(SHPK),ENSBTAG00000000888(SPTA1),ENSBTAG00000000892(CGAS),ENSBTAG00000000962(STAP1),ENSBTAG00000001219,ENSBTAG00000001273(NLRP3),ENSBTAG00000…
BP	GO:1903827	regulation of cellular protein localization	2.6e-10	1.16796e-08	ENSBTAG00000000013(PRKAA1),ENSBTAG00000000231(BMPR1A),ENSBTAG00000000257(MRAP2),ENSBTAG00000000322(CD2AP),ENSBTAG00000000347(RHOG),ENSBTAG00000000484(HYAL2),ENSBTAG00000000500(PINX1),ENSBTAG00000000511(CNST),ENSBTAG00000000546(TOB1),ENSBTAG00000000579(NIPBL),ENSBTAG00000000754(PPP2R5A),ENSBTAG00000000778(HSP90AB1),ENSBTAG00000000815(EPHA2),ENSBTAG00000000833(TAX1BP3),ENSBTAG00000000837(PARP1),ENS…
BP	GO:1903320	regulation of protein modification by small protein conjugation or removal	2.6e-10	1.16796e-08	ENSBTAG00000000436(TNFAIP3),ENSBTAG00000000500(PINX1),ENSBTAG00000000753(PIAS4),ENSBTAG00000000778(HSP90AB1),ENSBTAG00000000855(NXN),ENSBTAG00000000902(OGT),ENSBTAG00000001600(DCUN1D4),ENSBTAG00000001749(SENP2),ENSBTAG00000001826(SASH1),ENSBTAG00000002033(UBXN2A),ENSBTAG00000002144(ADRB2),ENSBTAG00000002487(UBE3A),ENSBTAG00000002612(FANCM),ENSBTAG00000002830(U2AF2),ENSBTAG00000002833(FBXO22),ENSB…
BP	GO:0007346	regulation of mitotic cell cycle	2.6e-10	1.16796e-08	ENSBTAG00000000372(TIPIN),ENSBTAG00000000483(HYAL1),ENSBTAG00000000500(PINX1),ENSBTAG00000000569(HES1),ENSBTAG00000000579(NIPBL),ENSBTAG00000000599(CCNI),ENSBTAG00000000604(GPNMB),ENSBTAG00000000608(PRCC),ENSBTAG00000000706(ADAMTS1),ENSBTAG00000001061(PRKCA),ENSBTAG00000001069(TP53),ENSBTAG00000001083(MAP3K20),ENSBTAG00000001221(NKX3-1),ENSBTAG00000001321(IL1B),ENSBTAG00000001424(MSH6),ENSBTAG000…
BP	GO:0001817	regulation of cytokine production	2.8e-10	1.25202e-08	ENSBTAG00000000016(LTA),ENSBTAG00000000031(TRPV4),ENSBTAG00000000095(CD274),ENSBTAG00000000113(ARHGEF2),ENSBTAG00000000184(EIF2AK3),ENSBTAG00000000223(PPM1B),ENSBTAG00000000259(CHIA),ENSBTAG00000000273(IL5RA),ENSBTAG00000000322(CD2AP),ENSBTAG00000000415(ERBIN),ENSBTAG00000000436(TNFAIP3),ENSBTAG00000000437(FFAR4),ENSBTAG00000000484(HYAL2),ENSBTAG00000000494(PDE4D),ENSBTAG00000000563(MYD88),ENSBTA…
BP	GO:0006259	DNA metabolic process	2.8e-10	1.25202e-08	ENSBTAG00000000064(FEN1),ENSBTAG00000000074(NFIA),ENSBTAG00000000080(GRWD1),ENSBTAG00000000098(SETDB1),ENSBTAG00000000130(TNFSF13),ENSBTAG00000000169(ASZ1),ENSBTAG00000000225(POLB),ENSBTAG00000000252(POLE3),ENSBTAG00000000267(SMG6),ENSBTAG00000000281(MND1),ENSBTAG00000000365(TDP2),ENSBTAG00000000372(TIPIN),ENSBTAG00000000375(SSRP1),ENSBTAG00000000500(PINX1),ENSBTAG00000000532(EXO5),ENSBTAG0000000…
MF	GO:0043565	sequence-specific DNA binding	2.9e-10	1.29376e-08	ENSBTAG00000000009(FOXF1),ENSBTAG00000000040(MAFG),ENSBTAG00000000074(NFIA),ENSBTAG00000000080(GRWD1),ENSBTAG00000000264(RFX6),ENSBTAG00000000267(SMG6),ENSBTAG00000000288(UPF2),ENSBTAG00000000305(LMO4),ENSBTAG00000000332(ERF),ENSBTAG00000000385(ZBTB18),ENSBTAG00000000504(GTF2B),ENSBTAG00000000507(NR4A1),ENSBTAG00000000536(ZNF395),ENSBTAG00000000541(NKX2-1),ENSBTAG00000000558(NEUROD6),ENSBTAG00000…
BP	GO:0098609	cell-cell adhesion	3e-10	1.33531e-08	ENSBTAG00000000009(FOXF1),ENSBTAG00000000026(VPS33B),ENSBTAG00000000031(TRPV4),ENSBTAG00000000061(PCDH7),ENSBTAG00000000088(ALCAM),ENSBTAG00000000095(CD274),ENSBTAG00000000182(SPINT2),ENSBTAG00000000253(PTPRF),ENSBTAG00000000317(MAPK8IP1),ENSBTAG00000000329(MEGF10),ENSBTAG00000000569(HES1),ENSBTAG00000000570(RET),ENSBTAG00000000604(GPNMB),ENSBTAG00000000700(PARVA),ENSBTAG00000000771(DNAJB6),ENSBT…
BP	GO:0051249	regulation of lymphocyte activation	3.2e-10	1.42108e-08	ENSBTAG00000000095(CD274),ENSBTAG00000000130(TNFSF13),ENSBTAG00000000317(MAPK8IP1),ENSBTAG00000000436(TNFAIP3),ENSBTAG00000000563(MYD88),ENSBTAG00000000569(HES1),ENSBTAG00000000604(GPNMB),ENSBTAG00000000816(PRDM1),ENSBTAG00000000888(SPTA1),ENSBTAG00000000892(CGAS),ENSBTAG00000001219,ENSBTAG00000001273(NLRP3),ENSBTAG00000001321(IL1B),ENSBTAG00000001424(MSH6),ENSBTAG00000001508(SH3RF1),ENSBTAG00000…
BP	GO:0007264	small GTPase mediated signal transduction	3.5e-10	1.54724e-08	ENSBTAG00000000025(RAB6A),ENSBTAG00000000098(SETDB1),ENSBTAG00000000105(RIT1),ENSBTAG00000000113(ARHGEF2),ENSBTAG00000000146(FARP1),ENSBTAG00000000210(ARHGAP31),ENSBTAG00000000279(RAB26),ENSBTAG00000000283(CSF1),ENSBTAG00000000322(CD2AP),ENSBTAG00000000347(RHOG),ENSBTAG00000000369(EPS8),ENSBTAG00000000490(RTKN),ENSBTAG00000000581(DOCK10),ENSBTAG00000000684(ARHGEF10L),ENSBTAG00000000833(TAX1BP3),E…
BP	GO:0001933	negative regulation of protein phosphorylation	3.5e-10	1.54724e-08	ENSBTAG00000000163(DDIT4),ENSBTAG00000000428(BAK1),ENSBTAG00000000436(TNFAIP3),ENSBTAG00000000484(HYAL2),ENSBTAG00000000494(PDE4D),ENSBTAG00000000625(SMAD6),ENSBTAG00000000746(KAT2B),ENSBTAG00000000842(UBASH3B),ENSBTAG00000000843(NDRG2),ENSBTAG00000000871(TRIM27),ENSBTAG00000001321(IL1B),ENSBTAG00000001567(LRRK1),ENSBTAG00000001729(DUSP10),ENSBTAG00000001774(SPRY2),ENSBTAG00000001776(SIRT2),ENSBT…
MF	GO:0001067	regulatory region nucleic acid binding	3.8e-10	1.67605e-08	ENSBTAG00000000009(FOXF1),ENSBTAG00000000040(MAFG),ENSBTAG00000000074(NFIA),ENSBTAG00000000222(ARID4B),ENSBTAG00000000264(RFX6),ENSBTAG00000000305(LMO4),ENSBTAG00000000418(TOX3),ENSBTAG00000000504(GTF2B),ENSBTAG00000000507(NR4A1),ENSBTAG00000000536(ZNF395),ENSBTAG00000000541(NKX2-1),ENSBTAG00000000558(NEUROD6),ENSBTAG00000000565(RFX7),ENSBTAG00000000569(HES1),ENSBTAG00000000602(RXRB),ENSBTAG00000…
BP	GO:0016070	RNA metabolic process	3.9e-10	1.71239e-08	ENSBTAG00000000009(FOXF1),ENSBTAG00000000013(PRKAA1),ENSBTAG00000000023(RNF2),ENSBTAG00000000031(TRPV4),ENSBTAG00000000039(SIRT7),ENSBTAG00000000040(MAFG),ENSBTAG00000000054(SNAPC4),ENSBTAG00000000064(FEN1),ENSBTAG00000000072(TFB2M),ENSBTAG00000000074(NFIA),ENSBTAG00000000092(HIF1AN),ENSBTAG00000000098(SETDB1),ENSBTAG00000000113(ARHGEF2),ENSBTAG00000000169(ASZ1),ENSBTAG00000000179(RPUSD1),ENSBTAG…
BP	GO:0051648	vesicle localization	3.9e-10	1.71239e-08	ENSBTAG00000000026(VPS33B),ENSBTAG00000000274(YKT6),ENSBTAG00000000529(BTBD9),ENSBTAG00000000764(GIPC1),ENSBTAG00000000854(SEC16B),ENSBTAG00000001037(MAP4K2),ENSBTAG00000001057(ARFGAP3),ENSBTAG00000001243(AP3M2),ENSBTAG00000001332(MYO1C),ENSBTAG00000001394(TMED9),ENSBTAG00000001398(ATP2A2),ENSBTAG00000001407(AP3S2),ENSBTAG00000001599(SV2A),ENSBTAG00000001657(PICALM),ENSBTAG00000001801(SYT4),ENSBT…
BP	GO:0032844	regulation of homeostatic process	4e-10	1.75234e-08	ENSBTAG00000000264(RFX6),ENSBTAG00000000267(SMG6),ENSBTAG00000000428(BAK1),ENSBTAG00000000494(PDE4D),ENSBTAG00000000500(PINX1),ENSBTAG00000000668(SLC22A5),ENSBTAG00000000730(GCG),ENSBTAG00000000782(KDR),ENSBTAG00000000842(UBASH3B),ENSBTAG00000001321(IL1B),ENSBTAG00000001463(TNKS),ENSBTAG00000001575(CALM2),ENSBTAG00000001717(AURKB),ENSBTAG00000001725(CXCL10),ENSBTAG00000001755(NEUROD1),ENSBTAG0000…
BP	GO:0061024	membrane organization	4.3e-10	1.87532e-08	ENSBTAG00000000026(VPS33B),ENSBTAG00000000071(PMP2),ENSBTAG00000000090(SEC31B),ENSBTAG00000000243(HEBP2),ENSBTAG00000000274(YKT6),ENSBTAG00000000275(PARP11),ENSBTAG00000000329(MEGF10),ENSBTAG00000000344(SPACA3),ENSBTAG00000000411(HGS),ENSBTAG00000000428(BAK1),ENSBTAG00000000473(ATP10D),ENSBTAG00000000484(HYAL2),ENSBTAG00000000562(TOMM20),ENSBTAG00000000711(NDRG1),ENSBTAG00000000854(SEC16B),ENSBTA…
BP	GO:0008284	positive regulation of cell proliferation	4.3e-10	1.87532e-08	ENSBTAG00000000009(FOXF1),ENSBTAG00000000095(CD274),ENSBTAG00000000128(FGF18),ENSBTAG00000000231(BMPR1A),ENSBTAG00000000283(CSF1),ENSBTAG00000000372(TIPIN),ENSBTAG00000000396(PIM1),ENSBTAG00000000436(TNFAIP3),ENSBTAG00000000476(THPO),ENSBTAG00000000483(HYAL1),ENSBTAG00000000563(MYD88),ENSBTAG00000000569(HES1),ENSBTAG00000000575(TNC),ENSBTAG00000000593(ST8SIA1),ENSBTAG00000000599(CCNI),ENSBTAG0000…
MF	GO:0000975	regulatory region DNA binding	4.5e-10	1.94943e-08	ENSBTAG00000000009(FOXF1),ENSBTAG00000000040(MAFG),ENSBTAG00000000074(NFIA),ENSBTAG00000000222(ARID4B),ENSBTAG00000000264(RFX6),ENSBTAG00000000305(LMO4),ENSBTAG00000000418(TOX3),ENSBTAG00000000504(GTF2B),ENSBTAG00000000507(NR4A1),ENSBTAG00000000536(ZNF395),ENSBTAG00000000541(NKX2-1),ENSBTAG00000000558(NEUROD6),ENSBTAG00000000565(RFX7),ENSBTAG00000000569(HES1),ENSBTAG00000000602(RXRB),ENSBTAG00000…
MF	GO:0044212	transcription regulatory region DNA binding	4.5e-10	1.94943e-08	ENSBTAG00000000009(FOXF1),ENSBTAG00000000040(MAFG),ENSBTAG00000000074(NFIA),ENSBTAG00000000222(ARID4B),ENSBTAG00000000264(RFX6),ENSBTAG00000000305(LMO4),ENSBTAG00000000418(TOX3),ENSBTAG00000000504(GTF2B),ENSBTAG00000000507(NR4A1),ENSBTAG00000000536(ZNF395),ENSBTAG00000000541(NKX2-1),ENSBTAG00000000558(NEUROD6),ENSBTAG00000000565(RFX7),ENSBTAG00000000569(HES1),ENSBTAG00000000602(RXRB),ENSBTAG00000…
BP	GO:0031396	regulation of protein ubiquitination	4.5e-10	1.94943e-08	ENSBTAG00000000436(TNFAIP3),ENSBTAG00000000500(PINX1),ENSBTAG00000000778(HSP90AB1),ENSBTAG00000000855(NXN),ENSBTAG00000000902(OGT),ENSBTAG00000001600(DCUN1D4),ENSBTAG00000001749(SENP2),ENSBTAG00000001826(SASH1),ENSBTAG00000002033(UBXN2A),ENSBTAG00000002144(ADRB2),ENSBTAG00000002487(UBE3A),ENSBTAG00000002612(FANCM),ENSBTAG00000002830(U2AF2),ENSBTAG00000002833(FBXO22),ENSBTAG00000003087(DCUN1D5),EN…
BP	GO:0097529	myeloid leukocyte migration	4.7e-10	2.03155e-08	ENSBTAG00000000031(TRPV4),ENSBTAG00000000283(CSF1),ENSBTAG00000000494(PDE4D),ENSBTAG00000000563(MYD88),ENSBTAG00000000962(STAP1),ENSBTAG00000001191(CCL17),ENSBTAG00000001321(IL1B),ENSBTAG00000001725(CXCL10),ENSBTAG00000001815(ARHGEF5),ENSBTAG00000001987(SWAP70),ENSBTAG00000002080(CCN3),ENSBTAG00000002085(IL36G),ENSBTAG00000002150(IL17A),ENSBTAG00000002326(LGALS3),ENSBTAG00000002699(KIT),ENSBTAG00…
BP	GO:0007033	vacuole organization	5e-10	2.15643e-08	ENSBTAG00000000510(ATG101),ENSBTAG00000000878(RB1CC1),ENSBTAG00000001030(MTMR3),ENSBTAG00000001192(STX12),ENSBTAG00000001269(TMEM165),ENSBTAG00000001320(VPS16),ENSBTAG00000001607(TMEM41B),ENSBTAG00000001659(VPS4A),ENSBTAG00000002033(UBXN2A),ENSBTAG00000002493(VPS35),ENSBTAG00000002563(WDR45),ENSBTAG00000003001(LAMTOR1),ENSBTAG00000003208(RAB33B),ENSBTAG00000003695(WDR45B),ENSBTAG00000003928(ATG16…
MF	GO:0008092	cytoskeletal protein binding	5.4e-10	2.31866e-08	ENSBTAG00000000025(RAB6A),ENSBTAG00000000113(ARHGEF2),ENSBTAG00000000146(FARP1),ENSBTAG00000000225(POLB),ENSBTAG00000000317(MAPK8IP1),ENSBTAG00000000369(EPS8),ENSBTAG00000000512(SNTA1),ENSBTAG00000000634(MLPH),ENSBTAG00000000650(TUBGCP6),ENSBTAG00000000660(FAM83D),ENSBTAG00000000700(PARVA),ENSBTAG00000000711(NDRG1),ENSBTAG00000000764(GIPC1),ENSBTAG00000000778(HSP90AB1),ENSBTAG00000000828(CAPN6),E…
BP	GO:0040017	positive regulation of locomotion	5.4e-10	2.31866e-08	ENSBTAG00000000009(FOXF1),ENSBTAG00000000031(TRPV4),ENSBTAG00000000078(GLIPR2),ENSBTAG00000000113(ARHGEF2),ENSBTAG00000000128(FGF18),ENSBTAG00000000283(CSF1),ENSBTAG00000000483(HYAL1),ENSBTAG00000000570(RET),ENSBTAG00000000579(NIPBL),ENSBTAG00000000604(GPNMB),ENSBTAG00000000706(ADAMTS1),ENSBTAG00000000745(AQP1),ENSBTAG00000000782(KDR),ENSBTAG00000001061(PRKCA),ENSBTAG00000001204(JCAD),ENSBTAG0000…
BP	GO:0051704	multi-organism process	5.5e-10	2.3564e-08	ENSBTAG00000000016(LTA),ENSBTAG00000000023(RNF2),ENSBTAG00000000029(LYZL6),ENSBTAG00000000076(RECK),ENSBTAG00000000095(CD274),ENSBTAG00000000124(DHH),ENSBTAG00000000163(DDIT4),ENSBTAG00000000169(ASZ1),ENSBTAG00000000188(HS3ST5),ENSBTAG00000000222(ARID4B),ENSBTAG00000000223(PPM1B),ENSBTAG00000000241(STAU1),ENSBTAG00000000244(NRXN2),ENSBTAG00000000271(MNS1),ENSBTAG00000000344(SPACA3),ENSBTAG0000000…
BP	GO:0072594	establishment of protein localization to organelle	5.8e-10	2.47947e-08	ENSBTAG00000000013(PRKAA1),ENSBTAG00000000152(RANBP2),ENSBTAG00000000231(BMPR1A),ENSBTAG00000000411(HGS),ENSBTAG00000000436(TNFAIP3),ENSBTAG00000000475(IMMP1L),ENSBTAG00000000484(HYAL2),ENSBTAG00000000546(TOB1),ENSBTAG00000000562(TOMM20),ENSBTAG00000000579(NIPBL),ENSBTAG00000000784(MTERF4),ENSBTAG00000000985(RAB10),ENSBTAG00000001009(HCLS1),ENSBTAG00000001069(TP53),ENSBTAG00000001071(WRAP53),ENSB…
BP	GO:0009890	negative regulation of biosynthetic process	5.9e-10	2.51669e-08	ENSBTAG00000000009(FOXF1),ENSBTAG00000000023(RNF2),ENSBTAG00000000031(TRPV4),ENSBTAG00000000039(SIRT7),ENSBTAG00000000074(NFIA),ENSBTAG00000000092(HIF1AN),ENSBTAG00000000098(SETDB1),ENSBTAG00000000252(POLE3),ENSBTAG00000000266(NAB1),ENSBTAG00000000332(ERF),ENSBTAG00000000372(TIPIN),ENSBTAG00000000399(NANOS3),ENSBTAG00000000435(TARBP2),ENSBTAG00000000455(CREBZF),ENSBTAG00000000500(PINX1),ENSBTAG00…
BP	GO:0007159	leukocyte cell-cell adhesion	6e-10	2.55374e-08	ENSBTAG00000000095(CD274),ENSBTAG00000000317(MAPK8IP1),ENSBTAG00000000569(HES1),ENSBTAG00000000604(GPNMB),ENSBTAG00000000816(PRDM1),ENSBTAG00000000888(SPTA1),ENSBTAG00000000892(CGAS),ENSBTAG00000001273(NLRP3),ENSBTAG00000001321(IL1B),ENSBTAG00000001508(SH3RF1),ENSBTAG00000001511(BCL6),ENSBTAG00000001557(CCL28),ENSBTAG00000001729(DUSP10),ENSBTAG00000001805(TWSG1),ENSBTAG00000001864(NR4A3),ENSBTAG0…
BP	GO:2000147	positive regulation of cell motility	6.6e-10	2.79688e-08	ENSBTAG00000000009(FOXF1),ENSBTAG00000000031(TRPV4),ENSBTAG00000000078(GLIPR2),ENSBTAG00000000113(ARHGEF2),ENSBTAG00000000128(FGF18),ENSBTAG00000000283(CSF1),ENSBTAG00000000483(HYAL1),ENSBTAG00000000570(RET),ENSBTAG00000000579(NIPBL),ENSBTAG00000000604(GPNMB),ENSBTAG00000000706(ADAMTS1),ENSBTAG00000000745(AQP1),ENSBTAG00000000782(KDR),ENSBTAG00000001061(PRKCA),ENSBTAG00000001204(JCAD),ENSBTAG0000…
BP	GO:0045321	leukocyte activation	6.6e-10	2.79688e-08	ENSBTAG00000000009(FOXF1),ENSBTAG00000000095(CD274),ENSBTAG00000000130(TNFSF13),ENSBTAG00000000292(TCIRG1),ENSBTAG00000000296(IMPDH1),ENSBTAG00000000306(ITK),ENSBTAG00000000317(MAPK8IP1),ENSBTAG00000000428(BAK1),ENSBTAG00000000436(TNFAIP3),ENSBTAG00000000484(HYAL2),ENSBTAG00000000563(MYD88),ENSBTAG00000000569(HES1),ENSBTAG00000000604(GPNMB),ENSBTAG00000000711(NDRG1),ENSBTAG00000000816(PRDM1),ENSB…
BP	GO:0070371	ERK1 and ERK2 cascade	6.9e-10	2.91765e-08	ENSBTAG00000000031(TRPV4),ENSBTAG00000000078(GLIPR2),ENSBTAG00000000128(FGF18),ENSBTAG00000000437(FFAR4),ENSBTAG00000000476(THPO),ENSBTAG00000000604(GPNMB),ENSBTAG00000000660(FAM83D),ENSBTAG00000000730(GCG),ENSBTAG00000000782(KDR),ENSBTAG00000000815(EPHA2),ENSBTAG00000000843(NDRG2),ENSBTAG00000001191(CCL17),ENSBTAG00000001321(IL1B),ENSBTAG00000001462(FLT4),ENSBTAG00000001729(DUSP10),ENSBTAG000000…
BP	GO:0031327	negative regulation of cellular biosynthetic process	7.1e-10	2.99571e-08	ENSBTAG00000000009(FOXF1),ENSBTAG00000000023(RNF2),ENSBTAG00000000031(TRPV4),ENSBTAG00000000039(SIRT7),ENSBTAG00000000074(NFIA),ENSBTAG00000000092(HIF1AN),ENSBTAG00000000098(SETDB1),ENSBTAG00000000252(POLE3),ENSBTAG00000000266(NAB1),ENSBTAG00000000332(ERF),ENSBTAG00000000372(TIPIN),ENSBTAG00000000399(NANOS3),ENSBTAG00000000435(TARBP2),ENSBTAG00000000455(CREBZF),ENSBTAG00000000500(PINX1),ENSBTAG00…
BP	GO:0071496	cellular response to external stimulus	7.8e-10	3.28394e-08	ENSBTAG00000000013(PRKAA1),ENSBTAG00000000184(EIF2AK3),ENSBTAG00000000321(TBL2),ENSBTAG00000000396(PIM1),ENSBTAG00000000428(BAK1),ENSBTAG00000000697(RRP8),ENSBTAG00000000745(AQP1),ENSBTAG00000001030(MTMR3),ENSBTAG00000001069(TP53),ENSBTAG00000001295(DEPDC5),ENSBTAG00000001321(IL1B),ENSBTAG00000001936(PCK1),ENSBTAG00000002216(MYOD1),ENSBTAG00000002363(SESN2),ENSBTAG00000002480(NUDT1),ENSBTAG000000…
MF	GO:0003690	double-stranded DNA binding	7.9e-10	3.31885e-08	ENSBTAG00000000009(FOXF1),ENSBTAG00000000040(MAFG),ENSBTAG00000000074(NFIA),ENSBTAG00000000080(GRWD1),ENSBTAG00000000264(RFX6),ENSBTAG00000000281(MND1),ENSBTAG00000000305(LMO4),ENSBTAG00000000504(GTF2B),ENSBTAG00000000507(NR4A1),ENSBTAG00000000536(ZNF395),ENSBTAG00000000541(NKX2-1),ENSBTAG00000000558(NEUROD6),ENSBTAG00000000565(RFX7),ENSBTAG00000000569(HES1),ENSBTAG00000000602(RXRB),ENSBTAG000000…
CC	GO:0098590	plasma membrane region	8.1e-10	3.39554e-08	ENSBTAG00000000113(ARHGEF2),ENSBTAG00000000153(LRFN3),ENSBTAG00000000215(GNB1),ENSBTAG00000000231(BMPR1A),ENSBTAG00000000286(PFKM),ENSBTAG00000000292(TCIRG1),ENSBTAG00000000354(PDE6G),ENSBTAG00000000369(EPS8),ENSBTAG00000000377(BMX),ENSBTAG00000000415(ERBIN),ENSBTAG00000000484(HYAL2),ENSBTAG00000000497(AKR1A1),ENSBTAG00000000540(RNF112),ENSBTAG00000000561(OCLN),ENSBTAG00000000616(GPR161),ENSBTAG0…
BP	GO:1901135	carbohydrate derivative metabolic process	9e-10	3.76471e-08	ENSBTAG00000000077(ADSL),ENSBTAG00000000091(NDUFB8),ENSBTAG00000000111(UGP2),ENSBTAG00000000163(DDIT4),ENSBTAG00000000188(HS3ST5),ENSBTAG00000000259(CHIA),ENSBTAG00000000275(PARP11),ENSBTAG00000000286(PFKM),ENSBTAG00000000287(GNPDA2),ENSBTAG00000000296(IMPDH1),ENSBTAG00000000301,ENSBTAG00000000342(PLOD3),ENSBTAG00000000414(FUT6),ENSBTAG00000000459(POMGNT2),ENSBTAG00000000483(HYAL1),ENSBTAG0000000…
BP	GO:0016050	vesicle organization	9.5e-10	3.96533e-08	ENSBTAG00000000026(VPS33B),ENSBTAG00000000090(SEC31B),ENSBTAG00000000745(AQP1),ENSBTAG00000000854(SEC16B),ENSBTAG00000001057(ARFGAP3),ENSBTAG00000001192(STX12),ENSBTAG00000001320(VPS16),ENSBTAG00000001394(TMED9),ENSBTAG00000001400(AKT2),ENSBTAG00000001592(INSIG1),ENSBTAG00000001647(PLEKHJ1),ENSBTAG00000001657(PICALM),ENSBTAG00000001659(VPS4A),ENSBTAG00000001673(C2CD5),ENSBTAG00000001801(SYT4),ENS…
BP	GO:0051348	negative regulation of transferase activity	9.8e-10	4.08179e-08	ENSBTAG00000000436(TNFAIP3),ENSBTAG00000000484(HYAL2),ENSBTAG00000000500(PINX1),ENSBTAG00000000746(KAT2B),ENSBTAG00000000754(PPP2R5A),ENSBTAG00000000842(UBASH3B),ENSBTAG00000000871(TRIM27),ENSBTAG00000001069(TP53),ENSBTAG00000001321(IL1B),ENSBTAG00000001729(DUSP10),ENSBTAG00000001774(SPRY2),ENSBTAG00000001809(DUSP21),ENSBTAG00000002095(MEN1),ENSBTAG00000002277(MLLT1),ENSBTAG00000002645(SH3BP5L),E…
BP	GO:1901699	cellular response to nitrogen compound	1e-09	4.14733e-08	ENSBTAG00000000113(ARHGEF2),ENSBTAG00000000215(GNB1),ENSBTAG00000000435(TARBP2),ENSBTAG00000000438(GNRHR),ENSBTAG00000000494(PDE4D),ENSBTAG00000000507(NR4A1),ENSBTAG00000000582(LY6G6E),ENSBTAG00000000745(AQP1),ENSBTAG00000000746(KAT2B),ENSBTAG00000000837(PARP1),ENSBTAG00000000892(CGAS),ENSBTAG00000000902(OGT),ENSBTAG00000000985(RAB10),ENSBTAG00000001069(TP53),ENSBTAG00000001096(PRKRA),ENSBTAG0000…
BP	GO:0034612	response to tumor necrosis factor	1e-09	4.14733e-08	ENSBTAG00000000415(ERBIN),ENSBTAG00000000483(HYAL1),ENSBTAG00000000484(HYAL2),ENSBTAG00000000696(ILK),ENSBTAG00000000753(PIAS4),ENSBTAG00000000836(KRT8),ENSBTAG00000001191(CCL17),ENSBTAG00000001221(NKX3-1),ENSBTAG00000002130(SMPD4),ENSBTAG00000002216(MYOD1),ENSBTAG00000002632(CSN2),ENSBTAG00000003186(OTULIN),ENSBTAG00000003289,ENSBTAG00000003553(ZFP36L2),ENSBTAG00000004129(CCL11),ENSBTAG000000042…
BP	GO:0060627	regulation of vesicle-mediated transport	1.1e-09	4.5427e-08	ENSBTAG00000000009(FOXF1),ENSBTAG00000000073(LRPAP1),ENSBTAG00000000279(RAB26),ENSBTAG00000000411(HGS),ENSBTAG00000000511(CNST),ENSBTAG00000000522(AHSG),ENSBTAG00000000529(BTBD9),ENSBTAG00000000764(GIPC1),ENSBTAG00000000791(CALY),ENSBTAG00000000806(ATAD1),ENSBTAG00000000962(STAP1),ENSBTAG00000000985(RAB10),ENSBTAG00000001050(LDLRAP1),ENSBTAG00000001320(VPS16),ENSBTAG00000001321(IL1B),ENSBTAG00000…
BP	GO:0010638	positive regulation of organelle organization	1.1e-09	4.5427e-08	ENSBTAG00000000013(PRKAA1),ENSBTAG00000000064(FEN1),ENSBTAG00000000098(SETDB1),ENSBTAG00000000271(MNS1),ENSBTAG00000000502(DAZL),ENSBTAG00000000579(NIPBL),ENSBTAG00000000684(ARHGEF10L),ENSBTAG00000000730(GCG),ENSBTAG00000000782(KDR),ENSBTAG00000000871(TRIM27),ENSBTAG00000000897(IQGAP2),ENSBTAG00000000902(OGT),ENSBTAG00000000962(STAP1),ENSBTAG00000000992(BMP10),ENSBTAG00000001069(TP53),ENSBTAG0000…
BP	GO:0051222	positive regulation of protein transport	1.2e-09	4.94517e-08	ENSBTAG00000000013(PRKAA1),ENSBTAG00000000031(TRPV4),ENSBTAG00000000095(CD274),ENSBTAG00000000231(BMPR1A),ENSBTAG00000000259(CHIA),ENSBTAG00000000264(RFX6),ENSBTAG00000000286(PFKM),ENSBTAG00000000322(CD2AP),ENSBTAG00000000442(RBP4),ENSBTAG00000000484(HYAL2),ENSBTAG00000000511(CNST),ENSBTAG00000000730(GCG),ENSBTAG00000000854(SEC16B),ENSBTAG00000001009(HCLS1),ENSBTAG00000001015(TM9SF4),ENSBTAG00000…
BP	GO:0014070	response to organic cyclic compound	1.3e-09	5.33466e-08	ENSBTAG00000000009(FOXF1),ENSBTAG00000000013(PRKAA1),ENSBTAG00000000140(EPHX1),ENSBTAG00000000163(DDIT4),ENSBTAG00000000164(GNRH1),ENSBTAG00000000215(GNB1),ENSBTAG00000000396(PIM1),ENSBTAG00000000435(TARBP2),ENSBTAG00000000494(PDE4D),ENSBTAG00000000507(NR4A1),ENSBTAG00000000602(RXRB),ENSBTAG00000000745(AQP1),ENSBTAG00000000892(CGAS),ENSBTAG00000001021(CYP1A1),ENSBTAG00000001024(ARID1A),ENSBTAG000…
BP	GO:0009607	response to biotic stimulus	1.3e-09	5.33466e-08	ENSBTAG00000000016(LTA),ENSBTAG00000000029(LYZL6),ENSBTAG00000000095(CD274),ENSBTAG00000000163(DDIT4),ENSBTAG00000000184(EIF2AK3),ENSBTAG00000000223(PPM1B),ENSBTAG00000000344(SPACA3),ENSBTAG00000000415(ERBIN),ENSBTAG00000000428(BAK1),ENSBTAG00000000435(TARBP2),ENSBTAG00000000436(TNFAIP3),ENSBTAG00000000455(CREBZF),ENSBTAG00000000483(HYAL1),ENSBTAG00000000484(HYAL2),ENSBTAG00000000494(PDE4D),ENSBT…
BP	GO:0070925	organelle assembly	1.4e-09	5.72088e-08	ENSBTAG00000000113(ARHGEF2),ENSBTAG00000000271(MNS1),ENSBTAG00000000510(ATG101),ENSBTAG00000000630(LSM14A),ENSBTAG00000000650(TUBGCP6),ENSBTAG00000000687(POC1B),ENSBTAG00000000700(PARVA),ENSBTAG00000000746(KAT2B),ENSBTAG00000000784(MTERF4),ENSBTAG00000000819(RFX3),ENSBTAG00000000878(RB1CC1),ENSBTAG00000000899(TMEM17),ENSBTAG00000000992(BMP10),ENSBTAG00000001030(MTMR3),ENSBTAG00000001171(OGFOD1),E…
CC	GO:0031252	cell leading edge	1.4e-09	5.72088e-08	ENSBTAG00000000032(ABI3),ENSBTAG00000000113(ARHGEF2),ENSBTAG00000000210(ARHGAP31),ENSBTAG00000000305(LMO4),ENSBTAG00000000322(CD2AP),ENSBTAG00000000369(EPS8),ENSBTAG00000000377(BMX),ENSBTAG00000000696(ILK),ENSBTAG00000000700(PARVA),ENSBTAG00000000815(EPHA2),ENSBTAG00000000897(IQGAP2),ENSBTAG00000001017(SLK),ENSBTAG00000001029(RASGRP2),ENSBTAG00000001060(CXCR4),ENSBTAG00000001204(JCAD),ENSBTAG0000…
BP	GO:0006790	sulfur compound metabolic process	1.5e-09	6.09113e-08	ENSBTAG00000000141(NFU1),ENSBTAG00000000160(CBS),ENSBTAG00000000170(GSTT4),ENSBTAG00000000188(HS3ST5),ENSBTAG00000000390(TPST1),ENSBTAG00000000690(THEM5),ENSBTAG00000000831(CTNS),ENSBTAG00000001249(SULT1B1),ENSBTAG00000001306(FXN),ENSBTAG00000001405(GLCE),ENSBTAG00000001417(ACSM1),ENSBTAG00000001692(NDST1),ENSBTAG00000001754(AHCYL2),ENSBTAG00000001842(GSTM3),ENSBTAG00000001854(CIAPIN1),ENSBTAG000…
BP	GO:0019216	regulation of lipid metabolic process	1.5e-09	6.09113e-08	ENSBTAG00000000013(PRKAA1),ENSBTAG00000000124(DHH),ENSBTAG00000000754(PPP2R5A),ENSBTAG00000000944(LPCAT1),ENSBTAG00000001030(MTMR3),ENSBTAG00000001035(SF1),ENSBTAG00000001246(ATP1A1),ENSBTAG00000001321(IL1B),ENSBTAG00000001333(PPARG),ENSBTAG00000001400(AKT2),ENSBTAG00000001592(INSIG1),ENSBTAG00000001700(CDC42),ENSBTAG00000001864(NR4A3),ENSBTAG00000002350(PIK3R2),ENSBTAG00000002804(PDGFRB),ENSBTAG…
BP	GO:0045786	negative regulation of cell cycle	1.5e-09	6.09113e-08	ENSBTAG00000000372(TIPIN),ENSBTAG00000000436(TNFAIP3),ENSBTAG00000000500(PINX1),ENSBTAG00000000507(NR4A1),ENSBTAG00000000540(RNF112),ENSBTAG00000000604(GPNMB),ENSBTAG00000000608(PRCC),ENSBTAG00000000697(RRP8),ENSBTAG00000000746(KAT2B),ENSBTAG00000000778(HSP90AB1),ENSBTAG00000001069(TP53),ENSBTAG00000001083(MAP3K20),ENSBTAG00000001221(NKX3-1),ENSBTAG00000001225(RBM14),ENSBTAG00000001424(MSH6),ENSB…
MF	GO:0060090	molecular adaptor activity	1.6e-09	6.43008e-08	ENSBTAG00000000317(MAPK8IP1),ENSBTAG00000000369(EPS8),ENSBTAG00000000634(MLPH),ENSBTAG00000000962(STAP1),ENSBTAG00000001050(LDLRAP1),ENSBTAG00000001508(SH3RF1),ENSBTAG00000001847(CNTLN),ENSBTAG00000002048(PTPN11),ENSBTAG00000002072(ERCC2),ENSBTAG00000002095(MEN1),ENSBTAG00000002105(TEX261),ENSBTAG00000002147(PPP4R2),ENSBTAG00000002211(MAPK8IP3),ENSBTAG00000002883(RPTOR),ENSBTAG00000002922(GAB2),E…
BP	GO:0070372	regulation of ERK1 and ERK2 cascade	1.6e-09	6.43008e-08	ENSBTAG00000000031(TRPV4),ENSBTAG00000000078(GLIPR2),ENSBTAG00000000128(FGF18),ENSBTAG00000000437(FFAR4),ENSBTAG00000000476(THPO),ENSBTAG00000000604(GPNMB),ENSBTAG00000000660(FAM83D),ENSBTAG00000000730(GCG),ENSBTAG00000000782(KDR),ENSBTAG00000000815(EPHA2),ENSBTAG00000000843(NDRG2),ENSBTAG00000001191(CCL17),ENSBTAG00000001321(IL1B),ENSBTAG00000001462(FLT4),ENSBTAG00000001729(DUSP10),ENSBTAG000000…
BP	GO:0043069	negative regulation of programmed cell death	1.6e-09	6.43008e-08	ENSBTAG00000000013(PRKAA1),ENSBTAG00000000312(GRINA),ENSBTAG00000000317(MAPK8IP1),ENSBTAG00000000340(ADNP),ENSBTAG00000000395(ADAMTS20),ENSBTAG00000000396(PIM1),ENSBTAG00000000399(NANOS3),ENSBTAG00000000418(TOX3),ENSBTAG00000000436(TNFAIP3),ENSBTAG00000000437(FFAR4),ENSBTAG00000000507(NR4A1),ENSBTAG00000000625(SMAD6),ENSBTAG00000000640(SELENOS),ENSBTAG00000000730(GCG),ENSBTAG00000000735(BCL2A1),E…
BP	GO:0051493	regulation of cytoskeleton organization	1.6e-09	6.43008e-08	ENSBTAG00000000013(PRKAA1),ENSBTAG00000000113(ARHGEF2),ENSBTAG00000000322(CD2AP),ENSBTAG00000000347(RHOG),ENSBTAG00000000369(EPS8),ENSBTAG00000000684(ARHGEF10L),ENSBTAG00000000746(KAT2B),ENSBTAG00000000828(CAPN6),ENSBTAG00000000871(TRIM27),ENSBTAG00000000897(IQGAP2),ENSBTAG00000000962(STAP1),ENSBTAG00000000992(BMP10),ENSBTAG00000001009(HCLS1),ENSBTAG00000001028(MAP6),ENSBTAG00000001209(PHLDB2),EN…
CC	GO:0044440	endosomal part	1.6e-09	6.43008e-08	ENSBTAG00000000026(VPS33B),ENSBTAG00000000095(CD274),ENSBTAG00000000224(TSPAN15),ENSBTAG00000000320(UBAP1),ENSBTAG00000000411(HGS),ENSBTAG00000000564(NSG2),ENSBTAG00000000570(RET),ENSBTAG00000000710(PIP5K1C),ENSBTAG00000000711(NDRG1),ENSBTAG00000001269(TMEM165),ENSBTAG00000001320(VPS16),ENSBTAG00000001662(EHD3),ENSBTAG00000001942(SNX27),ENSBTAG00000001948(VTI1B),ENSBTAG00000002014(SNX1),ENSBTAG00…
BP	GO:1904951	positive regulation of establishment of protein localization	1.7e-09	6.77596e-08	ENSBTAG00000000013(PRKAA1),ENSBTAG00000000031(TRPV4),ENSBTAG00000000095(CD274),ENSBTAG00000000231(BMPR1A),ENSBTAG00000000259(CHIA),ENSBTAG00000000264(RFX6),ENSBTAG00000000286(PFKM),ENSBTAG00000000322(CD2AP),ENSBTAG00000000442(RBP4),ENSBTAG00000000484(HYAL2),ENSBTAG00000000511(CNST),ENSBTAG00000000730(GCG),ENSBTAG00000000854(SEC16B),ENSBTAG00000001009(HCLS1),ENSBTAG00000001015(TM9SF4),ENSBTAG00000…
BP	GO:0006281	DNA repair	1.7e-09	6.77596e-08	ENSBTAG00000000064(FEN1),ENSBTAG00000000225(POLB),ENSBTAG00000000365(TDP2),ENSBTAG00000000375(SSRP1),ENSBTAG00000000532(EXO5),ENSBTAG00000000579(NIPBL),ENSBTAG00000000590(POLE),ENSBTAG00000000629(MMS22L),ENSBTAG00000000632(RAD54B),ENSBTAG00000000837(PARP1),ENSBTAG00000000892(CGAS),ENSBTAG00000001069(TP53),ENSBTAG00000001071(WRAP53),ENSBTAG00000001424(MSH6),ENSBTAG00000001500(FIGNL1),ENSBTAG000000…
BP	GO:0051272	positive regulation of cellular component movement	1.7e-09	6.77596e-08	ENSBTAG00000000009(FOXF1),ENSBTAG00000000031(TRPV4),ENSBTAG00000000078(GLIPR2),ENSBTAG00000000113(ARHGEF2),ENSBTAG00000000128(FGF18),ENSBTAG00000000283(CSF1),ENSBTAG00000000483(HYAL1),ENSBTAG00000000570(RET),ENSBTAG00000000579(NIPBL),ENSBTAG00000000604(GPNMB),ENSBTAG00000000706(ADAMTS1),ENSBTAG00000000745(AQP1),ENSBTAG00000000782(KDR),ENSBTAG00000001061(PRKCA),ENSBTAG00000001204(JCAD),ENSBTAG0000…
BP	GO:0045766	positive regulation of angiogenesis	1.7e-09	6.77596e-08	ENSBTAG00000000128(FGF18),ENSBTAG00000000483(HYAL1),ENSBTAG00000000653(PPP1R16B),ENSBTAG00000000745(AQP1),ENSBTAG00000000782(KDR),ENSBTAG00000001061(PRKCA),ENSBTAG00000001204(JCAD),ENSBTAG00000001241(ISL1),ENSBTAG00000001321(IL1B),ENSBTAG00000001601(PKM),ENSBTAG00000001826(SASH1),ENSBTAG00000002006(THBS1),ENSBTAG00000002341(ETS1),ENSBTAG00000002813(GAB1),ENSBTAG00000002835(SMAD1),ENSBTAG000000030…
BP	GO:0001558	regulation of cell growth	1.9e-09	7.51157e-08	ENSBTAG00000000483(HYAL1),ENSBTAG00000000484(HYAL2),ENSBTAG00000000895(TAF9B),ENSBTAG00000000957(CDKN2AIP),ENSBTAG00000000992(BMP10),ENSBTAG00000001044(SUPV3L1),ENSBTAG00000001069(TP53),ENSBTAG00000001306(FXN),ENSBTAG00000001511(BCL6),ENSBTAG00000001801(SYT4),ENSBTAG00000001835(GJA1),ENSBTAG00000001870(CPNE6),ENSBTAG00000001941(SEMA4D),ENSBTAG00000001961(MAP1B),ENSBTAG00000002080(CCN3),ENSBTAG000…
BP	GO:0043066	negative regulation of apoptotic process	1.9e-09	7.51157e-08	ENSBTAG00000000013(PRKAA1),ENSBTAG00000000312(GRINA),ENSBTAG00000000317(MAPK8IP1),ENSBTAG00000000340(ADNP),ENSBTAG00000000395(ADAMTS20),ENSBTAG00000000396(PIM1),ENSBTAG00000000399(NANOS3),ENSBTAG00000000418(TOX3),ENSBTAG00000000436(TNFAIP3),ENSBTAG00000000437(FFAR4),ENSBTAG00000000507(NR4A1),ENSBTAG00000000625(SMAD6),ENSBTAG00000000640(SELENOS),ENSBTAG00000000730(GCG),ENSBTAG00000000735(BCL2A1),E…
BP	GO:0006935	chemotaxis	1.9e-09	7.51157e-08	ENSBTAG00000000031(TRPV4),ENSBTAG00000000088(ALCAM),ENSBTAG00000000128(FGF18),ENSBTAG00000000283(CSF1),ENSBTAG00000000347(RHOG),ENSBTAG00000000494(PDE4D),ENSBTAG00000000541(NKX2-1),ENSBTAG00000000700(PARVA),ENSBTAG00000000782(KDR),ENSBTAG00000000815(EPHA2),ENSBTAG00000000962(STAP1),ENSBTAG00000001060(CXCR4),ENSBTAG00000001081(PALLD),ENSBTAG00000001173(PLXNA2),ENSBTAG00000001191(CCL17),ENSBTAG0000…
BP	GO:2000113	negative regulation of cellular macromolecule biosynthetic process	1.9e-09	7.51157e-08	ENSBTAG00000000009(FOXF1),ENSBTAG00000000023(RNF2),ENSBTAG00000000031(TRPV4),ENSBTAG00000000039(SIRT7),ENSBTAG00000000074(NFIA),ENSBTAG00000000092(HIF1AN),ENSBTAG00000000098(SETDB1),ENSBTAG00000000252(POLE3),ENSBTAG00000000266(NAB1),ENSBTAG00000000332(ERF),ENSBTAG00000000372(TIPIN),ENSBTAG00000000399(NANOS3),ENSBTAG00000000435(TARBP2),ENSBTAG00000000455(CREBZF),ENSBTAG00000000500(PINX1),ENSBTAG00…
BP	GO:0033674	positive regulation of kinase activity	2e-09	7.8749e-08	ENSBTAG00000000056(STRADA),ENSBTAG00000000128(FGF18),ENSBTAG00000000152(RANBP2),ENSBTAG00000000205(MMD),ENSBTAG00000000218(MAP2K5),ENSBTAG00000000283(CSF1),ENSBTAG00000000305(LMO4),ENSBTAG00000000354(PDE6G),ENSBTAG00000000469(PPP2CA),ENSBTAG00000000570(RET),ENSBTAG00000000730(GCG),ENSBTAG00000000778(HSP90AB1),ENSBTAG00000000962(STAP1),ENSBTAG00000001017(SLK),ENSBTAG00000001037(MAP4K2),ENSBTAG0000…
BP	GO:0042692	muscle cell differentiation	2e-09	7.8749e-08	ENSBTAG00000000009(FOXF1),ENSBTAG00000000092(HIF1AN),ENSBTAG00000000329(MEGF10),ENSBTAG00000000435(TARBP2),ENSBTAG00000000569(HES1),ENSBTAG00000000656(NFATC1),ENSBTAG00000000731(WFIKKN2),ENSBTAG00000000919(HEY2),ENSBTAG00000000992(BMP10),ENSBTAG00000001024(ARID1A),ENSBTAG00000001086(FHL2),ENSBTAG00000001241(ISL1),ENSBTAG00000001271(PLG),ENSBTAG00000001398(ATP2A2),ENSBTAG00000001449(SRA1),ENSBTAG0…
BP	GO:0042330	taxis	2.1e-09	8.2353e-08	ENSBTAG00000000031(TRPV4),ENSBTAG00000000088(ALCAM),ENSBTAG00000000128(FGF18),ENSBTAG00000000283(CSF1),ENSBTAG00000000347(RHOG),ENSBTAG00000000494(PDE4D),ENSBTAG00000000541(NKX2-1),ENSBTAG00000000700(PARVA),ENSBTAG00000000782(KDR),ENSBTAG00000000815(EPHA2),ENSBTAG00000000962(STAP1),ENSBTAG00000001060(CXCR4),ENSBTAG00000001081(PALLD),ENSBTAG00000001173(PLXNA2),ENSBTAG00000001191(CCL17),ENSBTAG0000…
CC	GO:0016607	nuclear speck	2.1e-09	8.2353e-08	ENSBTAG00000000013(PRKAA1),ENSBTAG00000000415(ERBIN),ENSBTAG00000000423(RBM4B),ENSBTAG00000000545(PPP4R3B),ENSBTAG00000000608(PRCC),ENSBTAG00000000653(PPP1R16B),ENSBTAG00000001126(BMP2K),ENSBTAG00000001225(RBM14),ENSBTAG00000001415(THOC6),ENSBTAG00000001528(CDK13),ENSBTAG00000001574(GPATCH2),ENSBTAG00000001651(SYF2),ENSBTAG00000001729(DUSP10),ENSBTAG00000001731(GLYR1),ENSBTAG00000002086(PRPF4B),E…
BP	GO:1901362	organic cyclic compound biosynthetic process	2.4e-09	9.39284e-08	ENSBTAG00000000009(FOXF1),ENSBTAG00000000013(PRKAA1),ENSBTAG00000000023(RNF2),ENSBTAG00000000031(TRPV4),ENSBTAG00000000039(SIRT7),ENSBTAG00000000040(MAFG),ENSBTAG00000000042(PYCR1),ENSBTAG00000000054(SNAPC4),ENSBTAG00000000072(TFB2M),ENSBTAG00000000074(NFIA),ENSBTAG00000000077(ADSL),ENSBTAG00000000092(HIF1AN),ENSBTAG00000000098(SETDB1),ENSBTAG00000000113(ARHGEF2),ENSBTAG00000000124(DHH),ENSBTAG00…
BP	GO:0043623	cellular protein complex assembly	2.7e-09	1.05457e-07	ENSBTAG00000000021(WASHC3),ENSBTAG00000000091(NDUFB8),ENSBTAG00000000094(ATPAF1),ENSBTAG00000000369(EPS8),ENSBTAG00000000504(GTF2B),ENSBTAG00000000550(ATP5F1D),ENSBTAG00000000562(TOMM20),ENSBTAG00000000564(NSG2),ENSBTAG00000000625(SMAD6),ENSBTAG00000000650(TUBGCP6),ENSBTAG00000000705(COX7A2L),ENSBTAG00000000778(HSP90AB1),ENSBTAG00000000791(CALY),ENSBTAG00000000808(COX14),ENSBTAG00000000871(TRIM27…
BP	GO:0010558	negative regulation of macromolecule biosynthetic process	2.8e-09	1.09144e-07	ENSBTAG00000000009(FOXF1),ENSBTAG00000000023(RNF2),ENSBTAG00000000031(TRPV4),ENSBTAG00000000039(SIRT7),ENSBTAG00000000074(NFIA),ENSBTAG00000000092(HIF1AN),ENSBTAG00000000098(SETDB1),ENSBTAG00000000252(POLE3),ENSBTAG00000000266(NAB1),ENSBTAG00000000332(ERF),ENSBTAG00000000372(TIPIN),ENSBTAG00000000399(NANOS3),ENSBTAG00000000435(TARBP2),ENSBTAG00000000455(CREBZF),ENSBTAG00000000500(PINX1),ENSBTAG00…
BP	GO:0000902	cell morphogenesis	3e-09	1.16706e-07	ENSBTAG00000000056(STRADA),ENSBTAG00000000081(COL4A3BP),ENSBTAG00000000088(ALCAM),ENSBTAG00000000113(ARHGEF2),ENSBTAG00000000137(FRYL),ENSBTAG00000000182(SPINT2),ENSBTAG00000000342(PLOD3),ENSBTAG00000000347(RHOG),ENSBTAG00000000369(EPS8),ENSBTAG00000000541(NKX2-1),ENSBTAG00000000569(HES1),ENSBTAG00000000570(RET),ENSBTAG00000000588(CHODL),ENSBTAG00000000696(ILK),ENSBTAG00000000700(PARVA),ENSBTAG00…
BP	GO:0051650	establishment of vesicle localization	3.1e-09	1.20116e-07	ENSBTAG00000000274(YKT6),ENSBTAG00000000529(BTBD9),ENSBTAG00000000764(GIPC1),ENSBTAG00000000854(SEC16B),ENSBTAG00000001037(MAP4K2),ENSBTAG00000001057(ARFGAP3),ENSBTAG00000001243(AP3M2),ENSBTAG00000001332(MYO1C),ENSBTAG00000001394(TMED9),ENSBTAG00000001398(ATP2A2),ENSBTAG00000001407(AP3S2),ENSBTAG00000001599(SV2A),ENSBTAG00000001657(PICALM),ENSBTAG00000001801(SYT4),ENSBTAG00000001918(STXBP5L),ENSB…
BP	GO:0031532	actin cytoskeleton reorganization	3.1e-09	1.20116e-07	ENSBTAG00000000322(CD2AP),ENSBTAG00000000369(EPS8),ENSBTAG00000000700(PARVA),ENSBTAG00000000962(STAP1),ENSBTAG00000002083(AUTS2),ENSBTAG00000002167(NPHS2),ENSBTAG00000002699(KIT),ENSBTAG00000002738(S1PR2),ENSBTAG00000002809(CAPN10),ENSBTAG00000002813(GAB1),ENSBTAG00000002941(FES),ENSBTAG00000003051(FER),ENSBTAG00000003054(INSRR),ENSBTAG00000004279(RHOA),ENSBTAG00000004869(CXADR),ENSBTAG0000000490…
BP	GO:1901987	regulation of cell cycle phase transition	3.4e-09	1.31478e-07	ENSBTAG00000000483(HYAL1),ENSBTAG00000000500(PINX1),ENSBTAG00000000604(GPNMB),ENSBTAG00000000660(FAM83D),ENSBTAG00000000706(ADAMTS1),ENSBTAG00000001069(TP53),ENSBTAG00000001424(MSH6),ENSBTAG00000001567(LRRK1),ENSBTAG00000001651(SYF2),ENSBTAG00000001707(UIMC1),ENSBTAG00000001717(AURKB),ENSBTAG00000001749(SENP2),ENSBTAG00000001937(ANAPC11),ENSBTAG00000002072(ERCC2),ENSBTAG00000002073(RAD17),ENSBTAG…
BP	GO:0034248	regulation of cellular amide metabolic process	3.6e-09	1.38936e-07	ENSBTAG00000000184(EIF2AK3),ENSBTAG00000000201(LTN1),ENSBTAG00000000285(GUF1),ENSBTAG00000000399(NANOS3),ENSBTAG00000000423(RBM4B),ENSBTAG00000000435(TARBP2),ENSBTAG00000000502(DAZL),ENSBTAG00000000546(TOB1),ENSBTAG00000000555(ACO1),ENSBTAG00000000613(ELAVL1),ENSBTAG00000000623,ENSBTAG00000000630(LSM14A),ENSBTAG00000000738(DAPK1),ENSBTAG00000001069(TP53),ENSBTAG00000001096(PRKRA),ENSBTAG000000011…
BP	GO:0051252	regulation of RNA metabolic process	3.7e-09	1.42231e-07	ENSBTAG00000000009(FOXF1),ENSBTAG00000000013(PRKAA1),ENSBTAG00000000023(RNF2),ENSBTAG00000000031(TRPV4),ENSBTAG00000000039(SIRT7),ENSBTAG00000000040(MAFG),ENSBTAG00000000072(TFB2M),ENSBTAG00000000074(NFIA),ENSBTAG00000000092(HIF1AN),ENSBTAG00000000098(SETDB1),ENSBTAG00000000113(ARHGEF2),ENSBTAG00000000184(EIF2AK3),ENSBTAG00000000222(ARID4B),ENSBTAG00000000231(BMPR1A),ENSBTAG00000000252(POLE3),ENS…
BP	GO:0098657	import into cell	3.7e-09	1.42231e-07	ENSBTAG00000000005(GRK3),ENSBTAG00000000073(LRPAP1),ENSBTAG00000000082(KCNJ14),ENSBTAG00000000329(MEGF10),ENSBTAG00000000496(SLC12A8),ENSBTAG00000000522(AHSG),ENSBTAG00000000529(BTBD9),ENSBTAG00000000597(TMPRSS15),ENSBTAG00000000704(GUSB),ENSBTAG00000000736(LRP8),ENSBTAG00000000791(CALY),ENSBTAG00000000806(ATAD1),ENSBTAG00000000962(STAP1),ENSBTAG00000000973(KCNJ15),ENSBTAG00000001015(TM9SF4),ENSB…
BP	GO:0016197	endosomal transport	3.9e-09	1.49623e-07	ENSBTAG00000000025(RAB6A),ENSBTAG00000000274(YKT6),ENSBTAG00000000564(NSG2),ENSBTAG00000000676(DOP1A),ENSBTAG00000000704(GUSB),ENSBTAG00000000791(CALY),ENSBTAG00000000871(TRIM27),ENSBTAG00000000905(RAB6B),ENSBTAG00000000985(RAB10),ENSBTAG00000001117(ANKRD50),ENSBTAG00000001258(TMEM50B),ENSBTAG00000001296(TMEM50A),ENSBTAG00000001320(VPS16),ENSBTAG00000001352(ENTR1),ENSBTAG00000001404(CACNG3),ENSBT…
BP	GO:0002790	peptide secretion	4e-09	1.53157e-07	ENSBTAG00000000031(TRPV4),ENSBTAG00000000095(CD274),ENSBTAG00000000259(CHIA),ENSBTAG00000000264(RFX6),ENSBTAG00000000286(PFKM),ENSBTAG00000000292(TCIRG1),ENSBTAG00000000322(CD2AP),ENSBTAG00000000436(TNFAIP3),ENSBTAG00000000437(FFAR4),ENSBTAG00000000442(RBP4),ENSBTAG00000000484(HYAL2),ENSBTAG00000000730(GCG),ENSBTAG00000000745(AQP1),ENSBTAG00000000785(PASK),ENSBTAG00000000799(ICA1),ENSBTAG00000000…
BP	GO:1904018	positive regulation of vasculature development	4.3e-09	1.64321e-07	ENSBTAG00000000128(FGF18),ENSBTAG00000000483(HYAL1),ENSBTAG00000000653(PPP1R16B),ENSBTAG00000000745(AQP1),ENSBTAG00000000782(KDR),ENSBTAG00000001061(PRKCA),ENSBTAG00000001204(JCAD),ENSBTAG00000001241(ISL1),ENSBTAG00000001321(IL1B),ENSBTAG00000001601(PKM),ENSBTAG00000001826(SASH1),ENSBTAG00000002006(THBS1),ENSBTAG00000002341(ETS1),ENSBTAG00000002699(KIT),ENSBTAG00000002813(GAB1),ENSBTAG00000002835…
BP	GO:0031669	cellular response to nutrient levels	4.6e-09	1.7544e-07	ENSBTAG00000000013(PRKAA1),ENSBTAG00000000184(EIF2AK3),ENSBTAG00000000321(TBL2),ENSBTAG00000000396(PIM1),ENSBTAG00000000697(RRP8),ENSBTAG00000001030(MTMR3),ENSBTAG00000001069(TP53),ENSBTAG00000001295(DEPDC5),ENSBTAG00000001936(PCK1),ENSBTAG00000002216(MYOD1),ENSBTAG00000002363(SESN2),ENSBTAG00000002504(IREB2),ENSBTAG00000002563(WDR45),ENSBTAG00000002799(SLC39A5),ENSBTAG00000002833(FBXO22),ENSBTAG…
BP	GO:0019725	cellular homeostasis	4.7e-09	1.78904e-07	ENSBTAG00000000013(PRKAA1),ENSBTAG00000000014(TXN2),ENSBTAG00000000031(TRPV4),ENSBTAG00000000203(ATP6V1G1),ENSBTAG00000000264(RFX6),ENSBTAG00000000286(PFKM),ENSBTAG00000000292(TCIRG1),ENSBTAG00000000312(GRINA),ENSBTAG00000000428(BAK1),ENSBTAG00000000494(PDE4D),ENSBTAG00000000496(SLC12A8),ENSBTAG00000000520(ATP2B3),ENSBTAG00000000555(ACO1),ENSBTAG00000000640(SELENOS),ENSBTAG00000000730(GCG),ENSBTA…
BP	GO:0006508	proteolysis	4.8e-09	1.82353e-07	ENSBTAG00000000010(UBL7),ENSBTAG00000000067(SDF2L1),ENSBTAG00000000076(RECK),ENSBTAG00000000120(USP43),ENSBTAG00000000124(DHH),ENSBTAG00000000131(SENP3),ENSBTAG00000000149(USP40),ENSBTAG00000000182(SPINT2),ENSBTAG00000000201(LTN1),ENSBTAG00000000251(ALAD),ENSBTAG00000000320(UBAP1),ENSBTAG00000000395(ADAMTS20),ENSBTAG00000000428(BAK1),ENSBTAG00000000436(TNFAIP3),ENSBTAG00000000475(IMMP1L),ENSBTAG0…
BP	GO:0006955	immune response	5e-09	1.88479e-07	ENSBTAG00000000009(FOXF1),ENSBTAG00000000016(LTA),ENSBTAG00000000095(CD274),ENSBTAG00000000130(TNFSF13),ENSBTAG00000000231(BMPR1A),ENSBTAG00000000273(IL5RA),ENSBTAG00000000283(CSF1),ENSBTAG00000000292(TCIRG1),ENSBTAG00000000306(ITK),ENSBTAG00000000377(BMX),ENSBTAG00000000415(ERBIN),ENSBTAG00000000436(TNFAIP3),ENSBTAG00000000494(PDE4D),ENSBTAG00000000563(MYD88),ENSBTAG00000000625(SMAD6),ENSBTAG000…
BP	GO:0032787	monocarboxylic acid metabolic process	5e-09	1.88479e-07	ENSBTAG00000000013(PRKAA1),ENSBTAG00000000085(CYP1A2),ENSBTAG00000000123(HAO2),ENSBTAG00000000163(DDIT4),ENSBTAG00000000246(ME3),ENSBTAG00000000286(PFKM),ENSBTAG00000000492(ASNSD1),ENSBTAG00000000497(AKR1A1),ENSBTAG00000000578(ABHD16A),ENSBTAG00000000730(GCG),ENSBTAG00000000894(PGK1),ENSBTAG00000000902(OGT),ENSBTAG00000001069(TP53),ENSBTAG00000001299(CYP7B1),ENSBTAG00000001321(IL1B),ENSBTAG000000…
CC	GO:0031967	organelle envelope	5e-09	1.88479e-07	ENSBTAG00000000022(NUP37),ENSBTAG00000000091(NDUFB8),ENSBTAG00000000099(CERS2),ENSBTAG00000000152(RANBP2),ENSBTAG00000000202(SLC25A19),ENSBTAG00000000271(MNS1),ENSBTAG00000000275(PARP11),ENSBTAG00000000285(GUF1),ENSBTAG00000000417(MRPL12),ENSBTAG00000000428(BAK1),ENSBTAG00000000448(BDH1),ENSBTAG00000000475(IMMP1L),ENSBTAG00000000494(PDE4D),ENSBTAG00000000507(NR4A1),ENSBTAG00000000550(ATP5F1D),ENS…
CC	GO:0031975	envelope	5e-09	1.88479e-07	ENSBTAG00000000022(NUP37),ENSBTAG00000000091(NDUFB8),ENSBTAG00000000099(CERS2),ENSBTAG00000000152(RANBP2),ENSBTAG00000000202(SLC25A19),ENSBTAG00000000271(MNS1),ENSBTAG00000000275(PARP11),ENSBTAG00000000285(GUF1),ENSBTAG00000000417(MRPL12),ENSBTAG00000000428(BAK1),ENSBTAG00000000448(BDH1),ENSBTAG00000000475(IMMP1L),ENSBTAG00000000494(PDE4D),ENSBTAG00000000507(NR4A1),ENSBTAG00000000550(ATP5F1D),ENS…
BP	GO:0050801	ion homeostasis	5.1e-09	1.91876e-07	ENSBTAG00000000031(TRPV4),ENSBTAG00000000203(ATP6V1G1),ENSBTAG00000000292(TCIRG1),ENSBTAG00000000312(GRINA),ENSBTAG00000000428(BAK1),ENSBTAG00000000484(HYAL2),ENSBTAG00000000494(PDE4D),ENSBTAG00000000496(SLC12A8),ENSBTAG00000000520(ATP2B3),ENSBTAG00000000529(BTBD9),ENSBTAG00000000555(ACO1),ENSBTAG00000000737(DMXL2),ENSBTAG00000000782(KDR),ENSBTAG00000000842(UBASH3B),ENSBTAG00000000898(F2RL2),ENSB…
CC	GO:0005938	cell cortex	5.5e-09	2.06526e-07	ENSBTAG00000000137(FRYL),ENSBTAG00000000347(RHOG),ENSBTAG00000000369(EPS8),ENSBTAG00000000490(RTKN),ENSBTAG00000000634(MLPH),ENSBTAG00000000764(GIPC1),ENSBTAG00000000888(SPTA1),ENSBTAG00000001137(CLTA),ENSBTAG00000001182(SEPT7),ENSBTAG00000001209(PHLDB2),ENSBTAG00000001400(AKT2),ENSBTAG00000001585(WIPF1),ENSBTAG00000001610(SLC4A1),ENSBTAG00000001673(C2CD5),ENSBTAG00000001700(CDC42),ENSBTAG0000000…
BP	GO:0006952	defense response	5.6e-09	2.09876e-07	ENSBTAG00000000009(FOXF1),ENSBTAG00000000016(LTA),ENSBTAG00000000029(LYZL6),ENSBTAG00000000031(TRPV4),ENSBTAG00000000163(DDIT4),ENSBTAG00000000223(PPM1B),ENSBTAG00000000225(POLB),ENSBTAG00000000259(CHIA),ENSBTAG00000000273(IL5RA),ENSBTAG00000000283(CSF1),ENSBTAG00000000292(TCIRG1),ENSBTAG00000000344(SPACA3),ENSBTAG00000000415(ERBIN),ENSBTAG00000000435(TARBP2),ENSBTAG00000000436(TNFAIP3),ENSBTAG00…
BP	GO:0046486	glycerolipid metabolic process	5.9e-09	2.2027e-07	ENSBTAG00000000019(SERINC1),ENSBTAG00000000065(CRLS1),ENSBTAG00000000301,ENSBTAG00000000578(ABHD16A),ENSBTAG00000000675(PGS1),ENSBTAG00000000690(THEM5),ENSBTAG00000000710(PIP5K1C),ENSBTAG00000000817(SYNJ2),ENSBTAG00000000944(LPCAT1),ENSBTAG00000001030(MTMR3),ENSBTAG00000001354(INPP5E),ENSBTAG00000001420(ABHD12),ENSBTAG00000001592(INSIG1),ENSBTAG00000001868(PCYT2),ENSBTAG00000001915(APOH),ENSBTAG0…
BP	GO:0006006	glucose metabolic process	5.9e-09	2.2027e-07	ENSBTAG00000000013(PRKAA1),ENSBTAG00000000152(RANBP2),ENSBTAG00000000286(PFKM),ENSBTAG00000000442(RBP4),ENSBTAG00000000545(PPP4R3B),ENSBTAG00000000730(GCG),ENSBTAG00000000746(KAT2B),ENSBTAG00000000785(PASK),ENSBTAG00000000894(PGK1),ENSBTAG00000000902(OGT),ENSBTAG00000001069(TP53),ENSBTAG00000001400(AKT2),ENSBTAG00000001578(ADPGK),ENSBTAG00000001936(PCK1),ENSBTAG00000002363(SESN2),ENSBTAG000000026…
CC	GO:0044463	cell projection part	6e-09	2.23147e-07	ENSBTAG00000000109(NPTXR),ENSBTAG00000000113(ARHGEF2),ENSBTAG00000000215(GNB1),ENSBTAG00000000271(MNS1),ENSBTAG00000000286(PFKM),ENSBTAG00000000354(PDE6G),ENSBTAG00000000369(EPS8),ENSBTAG00000000377(BMX),ENSBTAG00000000534(PNOC),ENSBTAG00000000542(CFAP36),ENSBTAG00000000616(GPR161),ENSBTAG00000000621(CATSPERG),ENSBTAG00000000668(SLC22A5),ENSBTAG00000000687(POC1B),ENSBTAG00000000745(AQP1),ENSBTAG0…
CC	GO:0120038	plasma membrane bounded cell projection part	6e-09	2.23147e-07	ENSBTAG00000000109(NPTXR),ENSBTAG00000000113(ARHGEF2),ENSBTAG00000000215(GNB1),ENSBTAG00000000271(MNS1),ENSBTAG00000000286(PFKM),ENSBTAG00000000354(PDE6G),ENSBTAG00000000369(EPS8),ENSBTAG00000000377(BMX),ENSBTAG00000000534(PNOC),ENSBTAG00000000542(CFAP36),ENSBTAG00000000616(GPR161),ENSBTAG00000000621(CATSPERG),ENSBTAG00000000668(SLC22A5),ENSBTAG00000000687(POC1B),ENSBTAG00000000745(AQP1),ENSBTAG0…
CC	GO:0010008	endosome membrane	6.1e-09	2.26433e-07	ENSBTAG00000000026(VPS33B),ENSBTAG00000000095(CD274),ENSBTAG00000000224(TSPAN15),ENSBTAG00000000320(UBAP1),ENSBTAG00000000411(HGS),ENSBTAG00000000564(NSG2),ENSBTAG00000000570(RET),ENSBTAG00000000710(PIP5K1C),ENSBTAG00000000711(NDRG1),ENSBTAG00000001269(TMEM165),ENSBTAG00000001320(VPS16),ENSBTAG00000001662(EHD3),ENSBTAG00000001942(SNX27),ENSBTAG00000001948(VTI1B),ENSBTAG00000002014(SNX1),ENSBTAG00…
CC	GO:0015629	actin cytoskeleton	6.6e-09	2.44527e-07	ENSBTAG00000000053(FILIP1),ENSBTAG00000000113(ARHGEF2),ENSBTAG00000000197(TRMT10A),ENSBTAG00000000322(CD2AP),ENSBTAG00000000462(CCDC102A),ENSBTAG00000000490(RTKN),ENSBTAG00000000634(MLPH),ENSBTAG00000000696(ILK),ENSBTAG00000000700(PARVA),ENSBTAG00000000738(DAPK1),ENSBTAG00000000744(DCTN6),ENSBTAG00000000746(KAT2B),ENSBTAG00000000833(TAX1BP3),ENSBTAG00000000888(SPTA1),ENSBTAG00000001081(PALLD),ENS…
CC	GO:0031300	intrinsic component of organelle membrane	6.7e-09	2.4776e-07	ENSBTAG00000000202(SLC25A19),ENSBTAG00000000279(RAB26),ENSBTAG00000000390(TPST1),ENSBTAG00000000428(BAK1),ENSBTAG00000000562(TOMM20),ENSBTAG00000001192(STX12),ENSBTAG00000001475(MCUR1),ENSBTAG00000001637(FUNDC1),ENSBTAG00000001744(BET1L),ENSBTAG00000001781(TOMM40),ENSBTAG00000001801(SYT4),ENSBTAG00000002105(TEX261),ENSBTAG00000002305(PCSK4),ENSBTAG00000002522(SYT5),ENSBTAG00000002599(MGARP),ENSBT…
MF	GO:0044877	macromolecular complex binding	6.9e-09	2.54672e-07	ENSBTAG00000000087(HSD17B12),ENSBTAG00000000201(LTN1),ENSBTAG00000000215(GNB1),ENSBTAG00000000253(PTPRF),ENSBTAG00000000267(SMG6),ENSBTAG00000000285(GUF1),ENSBTAG00000000343(ZNHIT1),ENSBTAG00000000396(PIM1),ENSBTAG00000000500(PINX1),ENSBTAG00000000504(GTF2B),ENSBTAG00000000510(ATG101),ENSBTAG00000000579(NIPBL),ENSBTAG00000000604(GPNMB),ENSBTAG00000000619(KRT74),ENSBTAG00000000623,ENSBTAG000000007…
BP	GO:0065003	macromolecular complex assembly	7.2e-09	2.65241e-07	ENSBTAG00000000021(WASHC3),ENSBTAG00000000077(ADSL),ENSBTAG00000000080(GRWD1),ENSBTAG00000000090(SEC31B),ENSBTAG00000000091(NDUFB8),ENSBTAG00000000094(ATPAF1),ENSBTAG00000000113(ARHGEF2),ENSBTAG00000000184(EIF2AK3),ENSBTAG00000000251(ALAD),ENSBTAG00000000252(POLE3),ENSBTAG00000000305(LMO4),ENSBTAG00000000369(EPS8),ENSBTAG00000000404(NAXE),ENSBTAG00000000435(TARBP2),ENSBTAG00000000439(SFSWAP),ENSB…
MF	GO:0048037	cofactor binding	7.3e-09	2.68416e-07	ENSBTAG00000000011(TDH),ENSBTAG00000000039(SIRT7),ENSBTAG00000000092(HIF1AN),ENSBTAG00000000123(HAO2),ENSBTAG00000000160(CBS),ENSBTAG00000000246(ME3),ENSBTAG00000000291(DHTKD1),ENSBTAG00000000405(VKORC1),ENSBTAG00000000505(KYAT3),ENSBTAG00000000786(NQO2),ENSBTAG00000000837(PARP1),ENSBTAG00000001032(PYGM),ENSBTAG00000001164(ACAD10),ENSBTAG00000001165(AIFM2),ENSBTAG00000001731(GLYR1),ENSBTAG0000000…
BP	GO:0045785	positive regulation of cell adhesion	7.6e-09	2.7892e-07	ENSBTAG00000000009(FOXF1),ENSBTAG00000000087(HSD17B12),ENSBTAG00000000095(CD274),ENSBTAG00000000283(CSF1),ENSBTAG00000000483(HYAL1),ENSBTAG00000000569(HES1),ENSBTAG00000000570(RET),ENSBTAG00000000782(KDR),ENSBTAG00000000888(SPTA1),ENSBTAG00000001061(PRKCA),ENSBTAG00000001273(NLRP3),ENSBTAG00000001321(IL1B),ENSBTAG00000001511(BCL6),ENSBTAG00000001557(CCL28),ENSBTAG00000001700(CDC42),ENSBTAG0000000…
BP	GO:0032535	regulation of cellular component size	7.9e-09	2.89384e-07	ENSBTAG00000000369(EPS8),ENSBTAG00000000496(SLC12A8),ENSBTAG00000000570(RET),ENSBTAG00000000745(AQP1),ENSBTAG00000000871(TRIM27),ENSBTAG00000000878(RB1CC1),ENSBTAG00000000897(IQGAP2),ENSBTAG00000000900(LRRC8C),ENSBTAG00000001009(HCLS1),ENSBTAG00000001131(SLC12A9),ENSBTAG00000001585(WIPF1),ENSBTAG00000001657(PICALM),ENSBTAG00000001941(SEMA4D),ENSBTAG00000001961(MAP1B),ENSBTAG00000001987(SWAP70),EN…
BP	GO:0006511	ubiquitin-dependent protein catabolic process	8.4e-09	3.06545e-07	ENSBTAG00000000010(UBL7),ENSBTAG00000000120(USP43),ENSBTAG00000000149(USP40),ENSBTAG00000000201(LTN1),ENSBTAG00000000320(UBAP1),ENSBTAG00000000436(TNFAIP3),ENSBTAG00000000640(SELENOS),ENSBTAG00000000725(USP42),ENSBTAG00000000764(GIPC1),ENSBTAG00000000778(HSP90AB1),ENSBTAG00000000856(FBXL6),ENSBTAG00000000902(OGT),ENSBTAG00000000911(UBE2H),ENSBTAG00000000990(PSMA2),ENSBTAG00000001356(USP38),ENSBTA…
BP	GO:0045596	negative regulation of cell differentiation	8.4e-09	3.06545e-07	ENSBTAG00000000031(TRPV4),ENSBTAG00000000113(ARHGEF2),ENSBTAG00000000164(GNRH1),ENSBTAG00000000231(BMPR1A),ENSBTAG00000000469(PPP2CA),ENSBTAG00000000541(NKX2-1),ENSBTAG00000000546(TOB1),ENSBTAG00000000569(HES1),ENSBTAG00000000625(SMAD6),ENSBTAG00000000656(NFATC1),ENSBTAG00000000842(UBASH3B),ENSBTAG00000000962(STAP1),ENSBTAG00000001019(GDF10),ENSBTAG00000001069(TP53),ENSBTAG00000001161(SINHCAF),EN…
BP	GO:0001503	ossification	9e-09	3.27826e-07	ENSBTAG00000000033(PHOSPHO1),ENSBTAG00000000057(THBS3),ENSBTAG00000000124(DHH),ENSBTAG00000000128(FGF18),ENSBTAG00000000184(EIF2AK3),ENSBTAG00000000231(BMPR1A),ENSBTAG00000000266(NAB1),ENSBTAG00000000283(CSF1),ENSBTAG00000000292(TCIRG1),ENSBTAG00000000522(AHSG),ENSBTAG00000000546(TOB1),ENSBTAG00000000579(NIPBL),ENSBTAG00000000625(SMAD6),ENSBTAG00000000696(ILK),ENSBTAG00000000815(EPHA2),ENSBTAG000…
BP	GO:0009306	protein secretion	9.2e-09	3.34484e-07	ENSBTAG00000000031(TRPV4),ENSBTAG00000000095(CD274),ENSBTAG00000000259(CHIA),ENSBTAG00000000264(RFX6),ENSBTAG00000000286(PFKM),ENSBTAG00000000292(TCIRG1),ENSBTAG00000000322(CD2AP),ENSBTAG00000000436(TNFAIP3),ENSBTAG00000000437(FFAR4),ENSBTAG00000000442(RBP4),ENSBTAG00000000484(HYAL2),ENSBTAG00000000730(GCG),ENSBTAG00000000799(ICA1),ENSBTAG00000000819(RFX3),ENSBTAG00000000871(TRIM27),ENSBTAG000000…
MF	GO:0017016	Ras GTPase binding	9.4e-09	3.40483e-07	ENSBTAG00000000113(ARHGEF2),ENSBTAG00000000146(FARP1),ENSBTAG00000000152(RANBP2),ENSBTAG00000000369(EPS8),ENSBTAG00000000460(SYTL2),ENSBTAG00000000490(RTKN),ENSBTAG00000000634(MLPH),ENSBTAG00000000684(ARHGEF10L),ENSBTAG00000000711(NDRG1),ENSBTAG00000000737(DMXL2),ENSBTAG00000000897(IQGAP2),ENSBTAG00000001332(MYO1C),ENSBTAG00000001483(SRGAP2),ENSBTAG00000001533(HACE1),ENSBTAG00000001551(PLEKHG3),E…
BP	GO:0046649	lymphocyte activation	9.4e-09	3.40483e-07	ENSBTAG00000000095(CD274),ENSBTAG00000000130(TNFSF13),ENSBTAG00000000292(TCIRG1),ENSBTAG00000000296(IMPDH1),ENSBTAG00000000306(ITK),ENSBTAG00000000317(MAPK8IP1),ENSBTAG00000000428(BAK1),ENSBTAG00000000436(TNFAIP3),ENSBTAG00000000563(MYD88),ENSBTAG00000000569(HES1),ENSBTAG00000000604(GPNMB),ENSBTAG00000000816(PRDM1),ENSBTAG00000000888(SPTA1),ENSBTAG00000000892(CGAS),ENSBTAG00000001002(TCF7),ENSBTA…
BP	GO:0018212	peptidyl-tyrosine modification	9.5e-09	3.43466e-07	ENSBTAG00000000113(ARHGEF2),ENSBTAG00000000306(ITK),ENSBTAG00000000377(BMX),ENSBTAG00000000390(TPST1),ENSBTAG00000000484(HYAL2),ENSBTAG00000000569(HES1),ENSBTAG00000000570(RET),ENSBTAG00000000782(KDR),ENSBTAG00000000815(EPHA2),ENSBTAG00000000962(STAP1),ENSBTAG00000001009(HCLS1),ENSBTAG00000001069(TP53),ENSBTAG00000001241(ISL1),ENSBTAG00000001462(FLT4),ENSBTAG00000001523(YES1),ENSBTAG00000001567(L…
CC	GO:0098793	presynapse	9.6e-09	3.46437e-07	ENSBTAG00000000153(LRFN3),ENSBTAG00000000265(SYNPR),ENSBTAG00000000279(RAB26),ENSBTAG00000000534(PNOC),ENSBTAG00000000540(RNF112),ENSBTAG00000000737(DMXL2),ENSBTAG00000000764(GIPC1),ENSBTAG00000000799(ICA1),ENSBTAG00000000817(SYNJ2),ENSBTAG00000000985(RAB10),ENSBTAG00000001075(CALB2),ENSBTAG00000001137(CLTA),ENSBTAG00000001192(STX12),ENSBTAG00000001394(TMED9),ENSBTAG00000001460(LIN7C),ENSBTAG0000…
MF	GO:0016746	transferase activity, transferring acyl groups	1e-08	3.56899e-07	ENSBTAG00000000099(CERS2),ENSBTAG00000000252(POLE3),ENSBTAG00000000274(YKT6),ENSBTAG00000000504(GTF2B),ENSBTAG00000000694(TAF10),ENSBTAG00000000746(KAT2B),ENSBTAG00000000895(TAF9B),ENSBTAG00000000902(OGT),ENSBTAG00000000944(LPCAT1),ENSBTAG00000001016(NAA35),ENSBTAG00000001144(NAA20),ENSBTAG00000001417(ACSM1),ENSBTAG00000001552(EPC1),ENSBTAG00000001785(TGM3),ENSBTAG00000001932(CRAT),ENSBTAG0000000…
BP	GO:0051707	response to other organism	1e-08	3.56899e-07	ENSBTAG00000000016(LTA),ENSBTAG00000000029(LYZL6),ENSBTAG00000000095(CD274),ENSBTAG00000000163(DDIT4),ENSBTAG00000000223(PPM1B),ENSBTAG00000000344(SPACA3),ENSBTAG00000000415(ERBIN),ENSBTAG00000000428(BAK1),ENSBTAG00000000435(TARBP2),ENSBTAG00000000436(TNFAIP3),ENSBTAG00000000455(CREBZF),ENSBTAG00000000483(HYAL1),ENSBTAG00000000484(HYAL2),ENSBTAG00000000494(PDE4D),ENSBTAG00000000563(MYD88),ENSBTAG…
BP	GO:0051186	cofactor metabolic process	1e-08	3.56899e-07	ENSBTAG00000000085(CYP1A2),ENSBTAG00000000141(NFU1),ENSBTAG00000000163(DDIT4),ENSBTAG00000000212(NADK),ENSBTAG00000000251(ALAD),ENSBTAG00000000286(PFKM),ENSBTAG00000000404(NAXE),ENSBTAG00000000497(AKR1A1),ENSBTAG00000000690(THEM5),ENSBTAG00000000795(NMNAT2),ENSBTAG00000000829(SHPK),ENSBTAG00000000888(SPTA1),ENSBTAG00000000894(PGK1),ENSBTAG00000000902(OGT),ENSBTAG00000001069(TP53),ENSBTAG000000013…
BP	GO:0006644	phospholipid metabolic process	1e-08	3.56899e-07	ENSBTAG00000000019(SERINC1),ENSBTAG00000000065(CRLS1),ENSBTAG00000000541(NKX2-1),ENSBTAG00000000675(PGS1),ENSBTAG00000000690(THEM5),ENSBTAG00000000710(PIP5K1C),ENSBTAG00000000717(PLPP2),ENSBTAG00000000817(SYNJ2),ENSBTAG00000000944(LPCAT1),ENSBTAG00000001030(MTMR3),ENSBTAG00000001354(INPP5E),ENSBTAG00000001420(ABHD12),ENSBTAG00000001700(CDC42),ENSBTAG00000001868(PCYT2),ENSBTAG00000002010(PI4K2A),E…
BP	GO:0045934	negative regulation of nucleobase-containing compound metabolic process	1e-08	3.56899e-07	ENSBTAG00000000009(FOXF1),ENSBTAG00000000023(RNF2),ENSBTAG00000000031(TRPV4),ENSBTAG00000000039(SIRT7),ENSBTAG00000000074(NFIA),ENSBTAG00000000092(HIF1AN),ENSBTAG00000000098(SETDB1),ENSBTAG00000000163(DDIT4),ENSBTAG00000000252(POLE3),ENSBTAG00000000266(NAB1),ENSBTAG00000000267(SMG6),ENSBTAG00000000332(ERF),ENSBTAG00000000372(TIPIN),ENSBTAG00000000455(CREBZF),ENSBTAG00000000500(PINX1),ENSBTAG00000…
CC	GO:0043228	non-membrane-bounded organelle	1e-08	3.56899e-07	ENSBTAG00000000014(TXN2),ENSBTAG00000000022(NUP37),ENSBTAG00000000023(RNF2),ENSBTAG00000000030(RDM1),ENSBTAG00000000039(SIRT7),ENSBTAG00000000049(CCDC77),ENSBTAG00000000053(FILIP1),ENSBTAG00000000064(FEN1),ENSBTAG00000000072(TFB2M),ENSBTAG00000000080(GRWD1),ENSBTAG00000000098(SETDB1),ENSBTAG00000000103(MRPL23),ENSBTAG00000000113(ARHGEF2),ENSBTAG00000000128(FGF18),ENSBTAG00000000131(SENP3),ENSBTAG…
BP	GO:0043632	modification-dependent macromolecule catabolic process	1.1e-08	3.89729e-07	ENSBTAG00000000010(UBL7),ENSBTAG00000000120(USP43),ENSBTAG00000000149(USP40),ENSBTAG00000000201(LTN1),ENSBTAG00000000320(UBAP1),ENSBTAG00000000436(TNFAIP3),ENSBTAG00000000640(SELENOS),ENSBTAG00000000725(USP42),ENSBTAG00000000764(GIPC1),ENSBTAG00000000778(HSP90AB1),ENSBTAG00000000856(FBXL6),ENSBTAG00000000902(OGT),ENSBTAG00000000911(UBE2H),ENSBTAG00000000990(PSMA2),ENSBTAG00000001356(USP38),ENSBTA…
BP	GO:0050673	epithelial cell proliferation	1.1e-08	3.89729e-07	ENSBTAG00000000231(BMPR1A),ENSBTAG00000000436(TNFAIP3),ENSBTAG00000000483(HYAL1),ENSBTAG00000000507(NR4A1),ENSBTAG00000000569(HES1),ENSBTAG00000000653(PPP1R16B),ENSBTAG00000000782(KDR),ENSBTAG00000000815(EPHA2),ENSBTAG00000001061(PRKCA),ENSBTAG00000001204(JCAD),ENSBTAG00000001221(NKX3-1),ENSBTAG00000001333(PPARG),ENSBTAG00000001462(FLT4),ENSBTAG00000001539(SAV1),ENSBTAG00000001700(CDC42),ENSBTAG0…
CC	GO:0005815	microtubule organizing center	1.1e-08	3.89729e-07	ENSBTAG00000000049(CCDC77),ENSBTAG00000000147(RIC8B),ENSBTAG00000000371(DIS3L),ENSBTAG00000000458(DYNC1LI2),ENSBTAG00000000494(PDE4D),ENSBTAG00000000545(PPP4R3B),ENSBTAG00000000566(CCDC14),ENSBTAG00000000650(TUBGCP6),ENSBTAG00000000687(POC1B),ENSBTAG00000000711(NDRG1),ENSBTAG00000000744(DCTN6),ENSBTAG00000000746(KAT2B),ENSBTAG00000000752(SGO1),ENSBTAG00000000754(PPP2R5A),ENSBTAG00000000838(CCDC88…
CC	GO:0043232	intracellular non-membrane-bounded organelle	1.1e-08	3.89729e-07	ENSBTAG00000000014(TXN2),ENSBTAG00000000022(NUP37),ENSBTAG00000000023(RNF2),ENSBTAG00000000030(RDM1),ENSBTAG00000000039(SIRT7),ENSBTAG00000000049(CCDC77),ENSBTAG00000000053(FILIP1),ENSBTAG00000000064(FEN1),ENSBTAG00000000072(TFB2M),ENSBTAG00000000080(GRWD1),ENSBTAG00000000098(SETDB1),ENSBTAG00000000103(MRPL23),ENSBTAG00000000113(ARHGEF2),ENSBTAG00000000128(FGF18),ENSBTAG00000000131(SENP3),ENSBTAG…
MF	GO:0031406	carboxylic acid binding	1.2e-08	4.22083e-07	ENSBTAG00000000071(PMP2),ENSBTAG00000000092(HIF1AN),ENSBTAG00000000342(PLOD3),ENSBTAG00000000437(FFAR4),ENSBTAG00000000484(HYAL2),ENSBTAG00000000802(LYVE1),ENSBTAG00000001116(P4HA2),ENSBTAG00000001171(OGFOD1),ENSBTAG00000001333(PPARG),ENSBTAG00000001488(OTC),ENSBTAG00000001740(HAPLN3),ENSBTAG00000001764(NCAN),ENSBTAG00000001936(PCK1),ENSBTAG00000002052(PLOD1),ENSBTAG00000002214(TAT),ENSBTAG000000…
BP	GO:0043254	regulation of protein complex assembly	1.2e-08	4.22083e-07	ENSBTAG00000000113(ARHGEF2),ENSBTAG00000000305(LMO4),ENSBTAG00000000369(EPS8),ENSBTAG00000000504(GTF2B),ENSBTAG00000000625(SMAD6),ENSBTAG00000000871(TRIM27),ENSBTAG00000000897(IQGAP2),ENSBTAG00000000919(HEY2),ENSBTAG00000001009(HCLS1),ENSBTAG00000001069(TP53),ENSBTAG00000001320(VPS16),ENSBTAG00000001570(CSF2),ENSBTAG00000001585(WIPF1),ENSBTAG00000001771(DYRK1A),ENSBTAG00000001776(SIRT2),ENSBTAG00…
BP	GO:0031347	regulation of defense response	1.2e-08	4.22083e-07	ENSBTAG00000000009(FOXF1),ENSBTAG00000000016(LTA),ENSBTAG00000000031(TRPV4),ENSBTAG00000000223(PPM1B),ENSBTAG00000000415(ERBIN),ENSBTAG00000000435(TARBP2),ENSBTAG00000000436(TNFAIP3),ENSBTAG00000000437(FFAR4),ENSBTAG00000000484(HYAL2),ENSBTAG00000000522(AHSG),ENSBTAG00000000563(MYD88),ENSBTAG00000000630(LSM14A),ENSBTAG00000000640(SELENOS),ENSBTAG00000000778(HSP90AB1),ENSBTAG00000000829(SHPK),ENSB…
BP	GO:0043207	response to external biotic stimulus	1.2e-08	4.22083e-07	ENSBTAG00000000016(LTA),ENSBTAG00000000029(LYZL6),ENSBTAG00000000095(CD274),ENSBTAG00000000163(DDIT4),ENSBTAG00000000223(PPM1B),ENSBTAG00000000344(SPACA3),ENSBTAG00000000415(ERBIN),ENSBTAG00000000428(BAK1),ENSBTAG00000000435(TARBP2),ENSBTAG00000000436(TNFAIP3),ENSBTAG00000000455(CREBZF),ENSBTAG00000000483(HYAL1),ENSBTAG00000000484(HYAL2),ENSBTAG00000000494(PDE4D),ENSBTAG00000000563(MYD88),ENSBTAG…
BP	GO:0010563	negative regulation of phosphorus metabolic process	1.3e-08	4.53159e-07	ENSBTAG00000000163(DDIT4),ENSBTAG00000000428(BAK1),ENSBTAG00000000436(TNFAIP3),ENSBTAG00000000460(SYTL2),ENSBTAG00000000484(HYAL2),ENSBTAG00000000494(PDE4D),ENSBTAG00000000511(CNST),ENSBTAG00000000625(SMAD6),ENSBTAG00000000653(PPP1R16B),ENSBTAG00000000746(KAT2B),ENSBTAG00000000754(PPP2R5A),ENSBTAG00000000837(PARP1),ENSBTAG00000000842(UBASH3B),ENSBTAG00000000843(NDRG2),ENSBTAG00000000871(TRIM27),E…
BP	GO:0045936	negative regulation of phosphate metabolic process	1.3e-08	4.53159e-07	ENSBTAG00000000163(DDIT4),ENSBTAG00000000428(BAK1),ENSBTAG00000000436(TNFAIP3),ENSBTAG00000000460(SYTL2),ENSBTAG00000000484(HYAL2),ENSBTAG00000000494(PDE4D),ENSBTAG00000000511(CNST),ENSBTAG00000000625(SMAD6),ENSBTAG00000000653(PPP1R16B),ENSBTAG00000000746(KAT2B),ENSBTAG00000000754(PPP2R5A),ENSBTAG00000000837(PARP1),ENSBTAG00000000842(UBASH3B),ENSBTAG00000000843(NDRG2),ENSBTAG00000000871(TRIM27),E…
BP	GO:1901990	regulation of mitotic cell cycle phase transition	1.3e-08	4.53159e-07	ENSBTAG00000000483(HYAL1),ENSBTAG00000000500(PINX1),ENSBTAG00000000604(GPNMB),ENSBTAG00000000706(ADAMTS1),ENSBTAG00000001069(TP53),ENSBTAG00000001424(MSH6),ENSBTAG00000001651(SYF2),ENSBTAG00000001717(AURKB),ENSBTAG00000001749(SENP2),ENSBTAG00000001937(ANAPC11),ENSBTAG00000002072(ERCC2),ENSBTAG00000002073(RAD17),ENSBTAG00000002121(CDK2AP2),ENSBTAG00000002226(FBXO31),ENSBTAG00000002474(MAD1L1),ENSB…
BP	GO:0031668	cellular response to extracellular stimulus	1.3e-08	4.53159e-07	ENSBTAG00000000013(PRKAA1),ENSBTAG00000000184(EIF2AK3),ENSBTAG00000000321(TBL2),ENSBTAG00000000396(PIM1),ENSBTAG00000000697(RRP8),ENSBTAG00000001030(MTMR3),ENSBTAG00000001069(TP53),ENSBTAG00000001295(DEPDC5),ENSBTAG00000001936(PCK1),ENSBTAG00000002216(MYOD1),ENSBTAG00000002363(SESN2),ENSBTAG00000002480(NUDT1),ENSBTAG00000002504(IREB2),ENSBTAG00000002563(WDR45),ENSBTAG00000002799(SLC39A5),ENSBTAG0…
BP	GO:0043161	proteasome-mediated ubiquitin-dependent protein catabolic process	1.3e-08	4.53159e-07	ENSBTAG00000000201(LTN1),ENSBTAG00000000640(SELENOS),ENSBTAG00000000764(GIPC1),ENSBTAG00000000778(HSP90AB1),ENSBTAG00000000856(FBXL6),ENSBTAG00000000902(OGT),ENSBTAG00000000911(UBE2H),ENSBTAG00000000990(PSMA2),ENSBTAG00000001503(TRIM72),ENSBTAG00000001548(UBQLN4),ENSBTAG00000001776(SIRT2),ENSBTAG00000001926(RAD23B),ENSBTAG00000002033(UBXN2A),ENSBTAG00000002098(CDC34),ENSBTAG00000002185(RNF7),ENSB…
BP	GO:0045860	positive regulation of protein kinase activity	1.4e-08	4.85408e-07	ENSBTAG00000000056(STRADA),ENSBTAG00000000128(FGF18),ENSBTAG00000000205(MMD),ENSBTAG00000000218(MAP2K5),ENSBTAG00000000283(CSF1),ENSBTAG00000000354(PDE6G),ENSBTAG00000000469(PPP2CA),ENSBTAG00000000570(RET),ENSBTAG00000000730(GCG),ENSBTAG00000000778(HSP90AB1),ENSBTAG00000000962(STAP1),ENSBTAG00000001017(SLK),ENSBTAG00000001037(MAP4K2),ENSBTAG00000001083(MAP3K20),ENSBTAG00000001292(LTF),ENSBTAG0000…
BP	GO:1903530	regulation of secretion by cell	1.4e-08	4.85408e-07	ENSBTAG00000000009(FOXF1),ENSBTAG00000000031(TRPV4),ENSBTAG00000000095(CD274),ENSBTAG00000000259(CHIA),ENSBTAG00000000264(RFX6),ENSBTAG00000000279(RAB26),ENSBTAG00000000286(PFKM),ENSBTAG00000000292(TCIRG1),ENSBTAG00000000322(CD2AP),ENSBTAG00000000411(HGS),ENSBTAG00000000436(TNFAIP3),ENSBTAG00000000437(FFAR4),ENSBTAG00000000442(RBP4),ENSBTAG00000000484(HYAL2),ENSBTAG00000000730(GCG),ENSBTAG0000000…
BP	GO:0009411	response to UV	1.4e-08	4.85408e-07	ENSBTAG00000000013(PRKAA1),ENSBTAG00000000372(TIPIN),ENSBTAG00000000428(BAK1),ENSBTAG00000000483(HYAL1),ENSBTAG00000000484(HYAL2),ENSBTAG00000000745(AQP1),ENSBTAG00000000837(PARP1),ENSBTAG00000001069(TP53),ENSBTAG00000001424(MSH6),ENSBTAG00000001717(AURKB),ENSBTAG00000001817(TMEM161A),ENSBTAG00000002072(ERCC2),ENSBTAG00000002075(MME),ENSBTAG00000002095(MEN1),ENSBTAG00000002323(USP28),ENSBTAG00000…
MF	GO:1990837	sequence-specific double-stranded DNA binding	1.5e-08	5.17314e-07	ENSBTAG00000000009(FOXF1),ENSBTAG00000000040(MAFG),ENSBTAG00000000074(NFIA),ENSBTAG00000000080(GRWD1),ENSBTAG00000000264(RFX6),ENSBTAG00000000305(LMO4),ENSBTAG00000000504(GTF2B),ENSBTAG00000000507(NR4A1),ENSBTAG00000000536(ZNF395),ENSBTAG00000000541(NKX2-1),ENSBTAG00000000558(NEUROD6),ENSBTAG00000000565(RFX7),ENSBTAG00000000569(HES1),ENSBTAG00000000602(RXRB),ENSBTAG00000000625(SMAD6),ENSBTAG00000…
BP	GO:0010038	response to metal ion	1.5e-08	5.17314e-07	ENSBTAG00000000013(PRKAA1),ENSBTAG00000000085(CYP1A2),ENSBTAG00000000292(TCIRG1),ENSBTAG00000000555(ACO1),ENSBTAG00000000745(AQP1),ENSBTAG00000001013(SLC30A5),ENSBTAG00000001029(RASGRP2),ENSBTAG00000001250(TFAP2A),ENSBTAG00000001306(FXN),ENSBTAG00000001575(CALM2),ENSBTAG00000001595(MT1E),ENSBTAG00000001635(CUTA),ENSBTAG00000001703(SYT13),ENSBTAG00000001801(SYT4),ENSBTAG00000001870(CPNE6),ENSBTAG0…
BP	GO:0032496	response to lipopolysaccharide	1.5e-08	5.17314e-07	ENSBTAG00000000095(CD274),ENSBTAG00000000415(ERBIN),ENSBTAG00000000436(TNFAIP3),ENSBTAG00000000494(PDE4D),ENSBTAG00000000563(MYD88),ENSBTAG00000000625(SMAD6),ENSBTAG00000000640(SELENOS),ENSBTAG00000000829(SHPK),ENSBTAG00000000962(STAP1),ENSBTAG00000001061(PRKCA),ENSBTAG00000001273(NLRP3),ENSBTAG00000001292(LTF),ENSBTAG00000001321(IL1B),ENSBTAG00000001725(CXCL10),ENSBTAG00000001729(DUSP10),ENSBTAG…
BP	GO:0071417	cellular response to organonitrogen compound	1.6e-08	5.48882e-07	ENSBTAG00000000113(ARHGEF2),ENSBTAG00000000215(GNB1),ENSBTAG00000000438(GNRHR),ENSBTAG00000000494(PDE4D),ENSBTAG00000000507(NR4A1),ENSBTAG00000000745(AQP1),ENSBTAG00000000746(KAT2B),ENSBTAG00000000837(PARP1),ENSBTAG00000000902(OGT),ENSBTAG00000000985(RAB10),ENSBTAG00000001069(TP53),ENSBTAG00000001151(APLP1),ENSBTAG00000001273(NLRP3),ENSBTAG00000001321(IL1B),ENSBTAG00000001332(MYO1C),ENSBTAG000000…
BP	GO:0006732	coenzyme metabolic process	1.6e-08	5.48882e-07	ENSBTAG00000000163(DDIT4),ENSBTAG00000000212(NADK),ENSBTAG00000000286(PFKM),ENSBTAG00000000404(NAXE),ENSBTAG00000000690(THEM5),ENSBTAG00000000795(NMNAT2),ENSBTAG00000000829(SHPK),ENSBTAG00000000894(PGK1),ENSBTAG00000000902(OGT),ENSBTAG00000001069(TP53),ENSBTAG00000001417(ACSM1),ENSBTAG00000001578(ADPGK),ENSBTAG00000001601(PKM),ENSBTAG00000001754(AHCYL2),ENSBTAG00000001855(COQ9),ENSBTAG00000001908…
BP	GO:0032870	cellular response to hormone stimulus	1.6e-08	5.48882e-07	ENSBTAG00000000013(PRKAA1),ENSBTAG00000000163(DDIT4),ENSBTAG00000000215(GNB1),ENSBTAG00000000438(GNRHR),ENSBTAG00000000507(NR4A1),ENSBTAG00000000602(RXRB),ENSBTAG00000000720(CTSL),ENSBTAG00000000745(AQP1),ENSBTAG00000000746(KAT2B),ENSBTAG00000000837(PARP1),ENSBTAG00000000902(OGT),ENSBTAG00000000985(RAB10),ENSBTAG00000001024(ARID1A),ENSBTAG00000001221(NKX3-1),ENSBTAG00000001246(ATP1A1),ENSBTAG0000…
BP	GO:0097193	intrinsic apoptotic signaling pathway	1.8e-08	6.16405e-07	ENSBTAG00000000163(DDIT4),ENSBTAG00000000184(EIF2AK3),ENSBTAG00000000225(POLB),ENSBTAG00000000312(GRINA),ENSBTAG00000000317(MAPK8IP1),ENSBTAG00000000428(BAK1),ENSBTAG00000000640(SELENOS),ENSBTAG00000000697(RRP8),ENSBTAG00000000735(BCL2A1),ENSBTAG00000000753(PIAS4),ENSBTAG00000000815(EPHA2),ENSBTAG00000001014(MAPK7),ENSBTAG00000001069(TP53),ENSBTAG00000001096(PRKRA),ENSBTAG00000001221(NKX3-1),ENSB…
BP	GO:0019941	modification-dependent protein catabolic process	1.9e-08	6.47231e-07	ENSBTAG00000000010(UBL7),ENSBTAG00000000120(USP43),ENSBTAG00000000149(USP40),ENSBTAG00000000201(LTN1),ENSBTAG00000000320(UBAP1),ENSBTAG00000000436(TNFAIP3),ENSBTAG00000000640(SELENOS),ENSBTAG00000000725(USP42),ENSBTAG00000000764(GIPC1),ENSBTAG00000000778(HSP90AB1),ENSBTAG00000000856(FBXL6),ENSBTAG00000000902(OGT),ENSBTAG00000000911(UBE2H),ENSBTAG00000000990(PSMA2),ENSBTAG00000001356(USP38),ENSBTA…
BP	GO:0018108	peptidyl-tyrosine phosphorylation	1.9e-08	6.47231e-07	ENSBTAG00000000113(ARHGEF2),ENSBTAG00000000306(ITK),ENSBTAG00000000377(BMX),ENSBTAG00000000484(HYAL2),ENSBTAG00000000569(HES1),ENSBTAG00000000570(RET),ENSBTAG00000000782(KDR),ENSBTAG00000000815(EPHA2),ENSBTAG00000000962(STAP1),ENSBTAG00000001009(HCLS1),ENSBTAG00000001069(TP53),ENSBTAG00000001241(ISL1),ENSBTAG00000001462(FLT4),ENSBTAG00000001523(YES1),ENSBTAG00000001567(LRRK1),ENSBTAG00000001570(C…
BP	GO:0098771	inorganic ion homeostasis	1.9e-08	6.47231e-07	ENSBTAG00000000031(TRPV4),ENSBTAG00000000203(ATP6V1G1),ENSBTAG00000000292(TCIRG1),ENSBTAG00000000312(GRINA),ENSBTAG00000000428(BAK1),ENSBTAG00000000484(HYAL2),ENSBTAG00000000494(PDE4D),ENSBTAG00000000496(SLC12A8),ENSBTAG00000000520(ATP2B3),ENSBTAG00000000529(BTBD9),ENSBTAG00000000555(ACO1),ENSBTAG00000000737(DMXL2),ENSBTAG00000000842(UBASH3B),ENSBTAG00000000898(F2RL2),ENSBTAG00000001013(SLC30A5),…
BP	GO:0071356	cellular response to tumor necrosis factor	2e-08	6.77735e-07	ENSBTAG00000000415(ERBIN),ENSBTAG00000000483(HYAL1),ENSBTAG00000000484(HYAL2),ENSBTAG00000000696(ILK),ENSBTAG00000000753(PIAS4),ENSBTAG00000000836(KRT8),ENSBTAG00000001191(CCL17),ENSBTAG00000001221(NKX3-1),ENSBTAG00000002130(SMPD4),ENSBTAG00000002216(MYOD1),ENSBTAG00000002632(CSN2),ENSBTAG00000003186(OTULIN),ENSBTAG00000003289,ENSBTAG00000003553(ZFP36L2),ENSBTAG00000004129(CCL11),ENSBTAG000000042…
BP	GO:0044282	small molecule catabolic process	2e-08	6.77735e-07	ENSBTAG00000000011(TDH),ENSBTAG00000000286(PFKM),ENSBTAG00000000287(GNPDA2),ENSBTAG00000000483(HYAL1),ENSBTAG00000000484(HYAL2),ENSBTAG00000000497(AKR1A1),ENSBTAG00000000578(ABHD16A),ENSBTAG00000000704(GUSB),ENSBTAG00000000817(SYNJ2),ENSBTAG00000001022(AMDHD2),ENSBTAG00000001069(TP53),ENSBTAG00000001249(SULT1B1),ENSBTAG00000001354(INPP5E),ENSBTAG00000001400(AKT2),ENSBTAG00000001488(OTC),ENSBTAG00…
BP	GO:0007169	transmembrane receptor protein tyrosine kinase signaling pathway	2e-08	6.77735e-07	ENSBTAG00000000128(FGF18),ENSBTAG00000000163(DDIT4),ENSBTAG00000000283(CSF1),ENSBTAG00000000354(PDE6G),ENSBTAG00000000411(HGS),ENSBTAG00000000413(NRTN),ENSBTAG00000000570(RET),ENSBTAG00000000782(KDR),ENSBTAG00000000815(EPHA2),ENSBTAG00000000842(UBASH3B),ENSBTAG00000000902(OGT),ENSBTAG00000000962(STAP1),ENSBTAG00000001204(JCAD),ENSBTAG00000001221(NKX3-1),ENSBTAG00000001244(PLAT),ENSBTAG00000001321…
BP	GO:0007265	Ras protein signal transduction	2.1e-08	7.06697e-07	ENSBTAG00000000025(RAB6A),ENSBTAG00000000098(SETDB1),ENSBTAG00000000105(RIT1),ENSBTAG00000000113(ARHGEF2),ENSBTAG00000000146(FARP1),ENSBTAG00000000279(RAB26),ENSBTAG00000000283(CSF1),ENSBTAG00000000347(RHOG),ENSBTAG00000000369(EPS8),ENSBTAG00000000490(RTKN),ENSBTAG00000000684(ARHGEF10L),ENSBTAG00000000833(TAX1BP3),ENSBTAG00000000898(F2RL2),ENSBTAG00000000902(OGT),ENSBTAG00000000905(RAB6B),ENSBTAG…
BP	GO:0016236	macroautophagy	2.1e-08	7.06697e-07	ENSBTAG00000000292(TCIRG1),ENSBTAG00000000510(ATG101),ENSBTAG00000000782(KDR),ENSBTAG00000000841(LZTS1),ENSBTAG00000000878(RB1CC1),ENSBTAG00000001030(MTMR3),ENSBTAG00000001069(TP53),ENSBTAG00000001192(STX12),ENSBTAG00000001303(HSPB8),ENSBTAG00000001320(VPS16),ENSBTAG00000001548(UBQLN4),ENSBTAG00000001607(TMEM41B),ENSBTAG00000001632(NBR1),ENSBTAG00000002033(UBXN2A),ENSBTAG00000002144(ADRB2),ENSBTA…
BP	GO:0055065	metal ion homeostasis	2.1e-08	7.06697e-07	ENSBTAG00000000031(TRPV4),ENSBTAG00000000203(ATP6V1G1),ENSBTAG00000000292(TCIRG1),ENSBTAG00000000312(GRINA),ENSBTAG00000000428(BAK1),ENSBTAG00000000484(HYAL2),ENSBTAG00000000494(PDE4D),ENSBTAG00000000496(SLC12A8),ENSBTAG00000000520(ATP2B3),ENSBTAG00000000529(BTBD9),ENSBTAG00000000555(ACO1),ENSBTAG00000000842(UBASH3B),ENSBTAG00000000898(F2RL2),ENSBTAG00000001013(SLC30A5),ENSBTAG00000001060(CXCR4),…
BP	GO:0022407	regulation of cell-cell adhesion	2.1e-08	7.06697e-07	ENSBTAG00000000026(VPS33B),ENSBTAG00000000031(TRPV4),ENSBTAG00000000095(CD274),ENSBTAG00000000182(SPINT2),ENSBTAG00000000317(MAPK8IP1),ENSBTAG00000000569(HES1),ENSBTAG00000000604(GPNMB),ENSBTAG00000000816(PRDM1),ENSBTAG00000000842(UBASH3B),ENSBTAG00000000888(SPTA1),ENSBTAG00000000892(CGAS),ENSBTAG00000001014(MAPK7),ENSBTAG00000001061(PRKCA),ENSBTAG00000001273(NLRP3),ENSBTAG00000001321(IL1B),ENSBT…
BP	GO:0030030	cell projection organization	2.2e-08	7.39071e-07	ENSBTAG00000000056(STRADA),ENSBTAG00000000088(ALCAM),ENSBTAG00000000109(NPTXR),ENSBTAG00000000137(FRYL),ENSBTAG00000000253(PTPRF),ENSBTAG00000000271(MNS1),ENSBTAG00000000347(RHOG),ENSBTAG00000000369(EPS8),ENSBTAG00000000413(NRTN),ENSBTAG00000000541(NKX2-1),ENSBTAG00000000569(HES1),ENSBTAG00000000570(RET),ENSBTAG00000000575(TNC),ENSBTAG00000000588(CHODL),ENSBTAG00000000653(PPP1R16B),ENSBTAG0000000…
MF	GO:0008289	lipid binding	2.3e-08	7.70005e-07	ENSBTAG00000000071(PMP2),ENSBTAG00000000081(COL4A3BP),ENSBTAG00000000437(FFAR4),ENSBTAG00000000442(RBP4),ENSBTAG00000000460(SYTL2),ENSBTAG00000000559(PLTP),ENSBTAG00000000667(APOL3),ENSBTAG00000000785(PASK),ENSBTAG00000000897(IQGAP2),ENSBTAG00000000902(OGT),ENSBTAG00000000939(KIF16B),ENSBTAG00000001050(LDLRAP1),ENSBTAG00000001077(OSBPL5),ENSBTAG00000001098(PLEKHA3),ENSBTAG00000001105(ANXA4),ENSBT…
BP	GO:0031647	regulation of protein stability	2.3e-08	7.70005e-07	ENSBTAG00000000149(USP40),ENSBTAG00000000396(PIM1),ENSBTAG00000000500(PINX1),ENSBTAG00000000764(GIPC1),ENSBTAG00000000838(CCDC88C),ENSBTAG00000000895(TAF9B),ENSBTAG00000000957(CDKN2AIP),ENSBTAG00000001069(TP53),ENSBTAG00000001096(PRKRA),ENSBTAG00000001192(STX12),ENSBTAG00000001539(SAV1),ENSBTAG00000001749(SENP2),ENSBTAG00000002323(USP28),ENSBTAG00000002493(VPS35),ENSBTAG00000002887(DDI1),ENSBTAG0…
BP	GO:0045444	fat cell differentiation	2.4e-08	8.02103e-07	ENSBTAG00000000031(TRPV4),ENSBTAG00000000437(FFAR4),ENSBTAG00000000507(NR4A1),ENSBTAG00000000569(HES1),ENSBTAG00000000579(NIPBL),ENSBTAG00000000625(SMAD6),ENSBTAG00000000900(LRRC8C),ENSBTAG00000001019(GDF10),ENSBTAG00000001333(PPARG),ENSBTAG00000001539(SAV1),ENSBTAG00000001592(INSIG1),ENSBTAG00000001729(DUSP10),ENSBTAG00000001749(SENP2),ENSBTAG00000001776(SIRT2),ENSBTAG00000001864(NR4A3),ENSBTAG0…
BP	GO:0033673	negative regulation of kinase activity	2.5e-08	8.32663e-07	ENSBTAG00000000436(TNFAIP3),ENSBTAG00000000484(HYAL2),ENSBTAG00000000746(KAT2B),ENSBTAG00000000754(PPP2R5A),ENSBTAG00000000842(UBASH3B),ENSBTAG00000000871(TRIM27),ENSBTAG00000001321(IL1B),ENSBTAG00000001729(DUSP10),ENSBTAG00000001774(SPRY2),ENSBTAG00000001809(DUSP21),ENSBTAG00000002095(MEN1),ENSBTAG00000002277(MLLT1),ENSBTAG00000002645(SH3BP5L),ENSBTAG00000002883(RPTOR),ENSBTAG00000002917(PRKAG2)…
BP	GO:0010564	regulation of cell cycle process	2.5e-08	8.32663e-07	ENSBTAG00000000064(FEN1),ENSBTAG00000000483(HYAL1),ENSBTAG00000000500(PINX1),ENSBTAG00000000501(KLHL13),ENSBTAG00000000502(DAZL),ENSBTAG00000000540(RNF112),ENSBTAG00000000579(NIPBL),ENSBTAG00000000599(CCNI),ENSBTAG00000000604(GPNMB),ENSBTAG00000000660(FAM83D),ENSBTAG00000000697(RRP8),ENSBTAG00000000706(ADAMTS1),ENSBTAG00000000746(KAT2B),ENSBTAG00000000764(GIPC1),ENSBTAG00000000778(HSP90AB1),ENSBT…
BP	GO:0070555	response to interleukin-1	2.6e-08	8.63014e-07	ENSBTAG00000000483(HYAL1),ENSBTAG00000000484(HYAL2),ENSBTAG00000001061(PRKCA),ENSBTAG00000001191(CCL17),ENSBTAG00000001221(NKX3-1),ENSBTAG00000001321(IL1B),ENSBTAG00000002150(IL17A),ENSBTAG00000003289,ENSBTAG00000004129(CCL11),ENSBTAG00000005273(IL1R1),ENSBTAG00000005560(ST18),ENSBTAG00000005581(CCL25),ENSBTAG00000006193(IRAK2),ENSBTAG00000006343(IL1R2),ENSBTAG00000006654(TANK),ENSBTAG00000007307…
BP	GO:0042594	response to starvation	2.6e-08	8.63014e-07	ENSBTAG00000000013(PRKAA1),ENSBTAG00000000184(EIF2AK3),ENSBTAG00000000321(TBL2),ENSBTAG00000000697(RRP8),ENSBTAG00000001030(MTMR3),ENSBTAG00000001069(TP53),ENSBTAG00000001295(DEPDC5),ENSBTAG00000001936(PCK1),ENSBTAG00000002216(MYOD1),ENSBTAG00000002363(SESN2),ENSBTAG00000002563(WDR45),ENSBTAG00000002799(SLC39A5),ENSBTAG00000002833(FBXO22),ENSBTAG00000002883(RPTOR),ENSBTAG00000003015(SESN1),ENSBTA…
CC	GO:0044297	cell body	2.7e-08	8.9468e-07	ENSBTAG00000000013(PRKAA1),ENSBTAG00000000088(ALCAM),ENSBTAG00000000109(NPTXR),ENSBTAG00000000113(ARHGEF2),ENSBTAG00000000241(STAU1),ENSBTAG00000000253(PTPRF),ENSBTAG00000000317(MAPK8IP1),ENSBTAG00000000404(NAXE),ENSBTAG00000000534(PNOC),ENSBTAG00000000540(RNF112),ENSBTAG00000000644(S100A5),ENSBTAG00000000778(HSP90AB1),ENSBTAG00000001296(TMEM50A),ENSBTAG00000001657(PICALM),ENSBTAG00000001776(SIRT…
BP	GO:0070997	neuron death	2.8e-08	9.23098e-07	ENSBTAG00000000102(GPR75),ENSBTAG00000000163(DDIT4),ENSBTAG00000000225(POLB),ENSBTAG00000000283(CSF1),ENSBTAG00000000340(ADNP),ENSBTAG00000000418(TOX3),ENSBTAG00000000604(GPNMB),ENSBTAG00000001069(TP53),ENSBTAG00000001241(ISL1),ENSBTAG00000001400(AKT2),ENSBTAG00000001403(PRKCI),ENSBTAG00000001657(PICALM),ENSBTAG00000001694(TYRO3),ENSBTAG00000001864(NR4A3),ENSBTAG00000002107(FZD1),ENSBTAG000000024…
BP	GO:0006469	negative regulation of protein kinase activity	2.8e-08	9.23098e-07	ENSBTAG00000000436(TNFAIP3),ENSBTAG00000000484(HYAL2),ENSBTAG00000000746(KAT2B),ENSBTAG00000000842(UBASH3B),ENSBTAG00000000871(TRIM27),ENSBTAG00000001321(IL1B),ENSBTAG00000001729(DUSP10),ENSBTAG00000001774(SPRY2),ENSBTAG00000001809(DUSP21),ENSBTAG00000002095(MEN1),ENSBTAG00000002277(MLLT1),ENSBTAG00000002645(SH3BP5L),ENSBTAG00000002883(RPTOR),ENSBTAG00000002917(PRKAG2),ENSBTAG00000003966(DUSP3),E…
BP	GO:0030595	leukocyte chemotaxis	2.8e-08	9.23098e-07	ENSBTAG00000000031(TRPV4),ENSBTAG00000000283(CSF1),ENSBTAG00000000494(PDE4D),ENSBTAG00000000962(STAP1),ENSBTAG00000001191(CCL17),ENSBTAG00000001321(IL1B),ENSBTAG00000001725(CXCL10),ENSBTAG00000001815(ARHGEF5),ENSBTAG00000001987(SWAP70),ENSBTAG00000002080(CCN3),ENSBTAG00000002085(IL36G),ENSBTAG00000002240(GPR18),ENSBTAG00000002326(LGALS3),ENSBTAG00000002346(HSD3B7),ENSBTAG00000002699(KIT),ENSBTAG0…
BP	GO:0048545	response to steroid hormone	2.9e-08	9.52836e-07	ENSBTAG00000000163(DDIT4),ENSBTAG00000000164(GNRH1),ENSBTAG00000000507(NR4A1),ENSBTAG00000000602(RXRB),ENSBTAG00000000745(AQP1),ENSBTAG00000001024(ARID1A),ENSBTAG00000001221(NKX3-1),ENSBTAG00000001246(ATP1A1),ENSBTAG00000001333(PPARG),ENSBTAG00000001790(SAFB2),ENSBTAG00000001864(NR4A3),ENSBTAG00000001936(PCK1),ENSBTAG00000002163(PTGER2),ENSBTAG00000002216(MYOD1),ENSBTAG00000002472(CASP9),ENSBTAG0…
BP	GO:0055082	cellular chemical homeostasis	2.9e-08	9.52836e-07	ENSBTAG00000000013(PRKAA1),ENSBTAG00000000031(TRPV4),ENSBTAG00000000203(ATP6V1G1),ENSBTAG00000000264(RFX6),ENSBTAG00000000292(TCIRG1),ENSBTAG00000000312(GRINA),ENSBTAG00000000428(BAK1),ENSBTAG00000000494(PDE4D),ENSBTAG00000000520(ATP2B3),ENSBTAG00000000555(ACO1),ENSBTAG00000000730(GCG),ENSBTAG00000000737(DMXL2),ENSBTAG00000000842(UBASH3B),ENSBTAG00000000898(F2RL2),ENSBTAG00000001013(SLC30A5),ENSB…
BP	GO:0060284	regulation of cell development	3.1e-08	1.00833e-06	ENSBTAG00000000076(RECK),ENSBTAG00000000113(ARHGEF2),ENSBTAG00000000164(GNRH1),ENSBTAG00000000205(MMD),ENSBTAG00000000231(BMPR1A),ENSBTAG00000000253(PTPRF),ENSBTAG00000000283(CSF1),ENSBTAG00000000540(RNF112),ENSBTAG00000000569(HES1),ENSBTAG00000000570(RET),ENSBTAG00000000579(NIPBL),ENSBTAG00000000588(CHODL),ENSBTAG00000000819(RFX3),ENSBTAG00000000919(HEY2),ENSBTAG00000000962(STAP1),ENSBTAG0000000…
BP	GO:0018130	heterocycle biosynthetic process	3.1e-08	1.00833e-06	ENSBTAG00000000009(FOXF1),ENSBTAG00000000013(PRKAA1),ENSBTAG00000000023(RNF2),ENSBTAG00000000031(TRPV4),ENSBTAG00000000039(SIRT7),ENSBTAG00000000040(MAFG),ENSBTAG00000000042(PYCR1),ENSBTAG00000000054(SNAPC4),ENSBTAG00000000072(TFB2M),ENSBTAG00000000074(NFIA),ENSBTAG00000000077(ADSL),ENSBTAG00000000092(HIF1AN),ENSBTAG00000000098(SETDB1),ENSBTAG00000000113(ARHGEF2),ENSBTAG00000000184(EIF2AK3),ENSBT…
BP	GO:1903037	regulation of leukocyte cell-cell adhesion	3.1e-08	1.00833e-06	ENSBTAG00000000095(CD274),ENSBTAG00000000317(MAPK8IP1),ENSBTAG00000000569(HES1),ENSBTAG00000000604(GPNMB),ENSBTAG00000000816(PRDM1),ENSBTAG00000000888(SPTA1),ENSBTAG00000000892(CGAS),ENSBTAG00000001273(NLRP3),ENSBTAG00000001321(IL1B),ENSBTAG00000001508(SH3RF1),ENSBTAG00000001511(BCL6),ENSBTAG00000001557(CCL28),ENSBTAG00000001729(DUSP10),ENSBTAG00000001805(TWSG1),ENSBTAG00000001864(NR4A3),ENSBTAG0…
CC	GO:0008021	synaptic vesicle	3.1e-08	1.00833e-06	ENSBTAG00000000265(SYNPR),ENSBTAG00000000279(RAB26),ENSBTAG00000000540(RNF112),ENSBTAG00000000737(DMXL2),ENSBTAG00000000764(GIPC1),ENSBTAG00000000799(ICA1),ENSBTAG00000000985(RAB10),ENSBTAG00000001137(CLTA),ENSBTAG00000001192(STX12),ENSBTAG00000001394(TMED9),ENSBTAG00000001599(SV2A),ENSBTAG00000001657(PICALM),ENSBTAG00000001981(SLC6A17),ENSBTAG00000002075(MME),ENSBTAG00000002349(STX1B),ENSBTAG000…
CC	GO:0005813	centrosome	3.1e-08	1.00833e-06	ENSBTAG00000000049(CCDC77),ENSBTAG00000000147(RIC8B),ENSBTAG00000000371(DIS3L),ENSBTAG00000000458(DYNC1LI2),ENSBTAG00000000494(PDE4D),ENSBTAG00000000545(PPP4R3B),ENSBTAG00000000566(CCDC14),ENSBTAG00000000650(TUBGCP6),ENSBTAG00000000687(POC1B),ENSBTAG00000000711(NDRG1),ENSBTAG00000000744(DCTN6),ENSBTAG00000000746(KAT2B),ENSBTAG00000000752(SGO1),ENSBTAG00000000754(PPP2R5A),ENSBTAG00000000838(CCDC88…
CC	GO:0099503	secretory vesicle	3.1e-08	1.00833e-06	ENSBTAG00000000025(RAB6A),ENSBTAG00000000026(VPS33B),ENSBTAG00000000265(SYNPR),ENSBTAG00000000279(RAB26),ENSBTAG00000000292(TCIRG1),ENSBTAG00000000344(SPACA3),ENSBTAG00000000460(SYTL2),ENSBTAG00000000540(RNF112),ENSBTAG00000000737(DMXL2),ENSBTAG00000000745(AQP1),ENSBTAG00000000764(GIPC1),ENSBTAG00000000799(ICA1),ENSBTAG00000000985(RAB10),ENSBTAG00000001013(SLC30A5),ENSBTAG00000001020(AKAP3),ENSBT…
BP	GO:0010608	posttranscriptional regulation of gene expression	3.2e-08	1.03912e-06	ENSBTAG00000000184(EIF2AK3),ENSBTAG00000000201(LTN1),ENSBTAG00000000267(SMG6),ENSBTAG00000000285(GUF1),ENSBTAG00000000399(NANOS3),ENSBTAG00000000423(RBM4B),ENSBTAG00000000435(TARBP2),ENSBTAG00000000502(DAZL),ENSBTAG00000000546(TOB1),ENSBTAG00000000555(ACO1),ENSBTAG00000000613(ELAVL1),ENSBTAG00000000623,ENSBTAG00000000630(LSM14A),ENSBTAG00000000738(DAPK1),ENSBTAG00000001069(TP53),ENSBTAG0000000109…
BP	GO:0045926	negative regulation of growth	3.3e-08	1.06802e-06	ENSBTAG00000000016(LTA),ENSBTAG00000000483(HYAL1),ENSBTAG00000000484(HYAL2),ENSBTAG00000000563(MYD88),ENSBTAG00000000957(CDKN2AIP),ENSBTAG00000000992(BMP10),ENSBTAG00000001069(TP53),ENSBTAG00000001306(FXN),ENSBTAG00000001511(BCL6),ENSBTAG00000001539(SAV1),ENSBTAG00000001729(DUSP10),ENSBTAG00000001823(STC2),ENSBTAG00000001835(GJA1),ENSBTAG00000001941(SEMA4D),ENSBTAG00000002080(CCN3),ENSBTAG0000000…
CC	GO:0043005	neuron projection	3.3e-08	1.06802e-06	ENSBTAG00000000013(PRKAA1),ENSBTAG00000000088(ALCAM),ENSBTAG00000000109(NPTXR),ENSBTAG00000000113(ARHGEF2),ENSBTAG00000000153(LRFN3),ENSBTAG00000000215(GNB1),ENSBTAG00000000241(STAU1),ENSBTAG00000000253(PTPRF),ENSBTAG00000000317(MAPK8IP1),ENSBTAG00000000354(PDE6G),ENSBTAG00000000369(EPS8),ENSBTAG00000000534(PNOC),ENSBTAG00000000564(NSG2),ENSBTAG00000000570(RET),ENSBTAG00000000623,ENSBTAG000000006…
BP	GO:0055080	cation homeostasis	3.4e-08	1.09492e-06	ENSBTAG00000000031(TRPV4),ENSBTAG00000000203(ATP6V1G1),ENSBTAG00000000292(TCIRG1),ENSBTAG00000000312(GRINA),ENSBTAG00000000428(BAK1),ENSBTAG00000000484(HYAL2),ENSBTAG00000000494(PDE4D),ENSBTAG00000000496(SLC12A8),ENSBTAG00000000520(ATP2B3),ENSBTAG00000000529(BTBD9),ENSBTAG00000000555(ACO1),ENSBTAG00000000737(DMXL2),ENSBTAG00000000842(UBASH3B),ENSBTAG00000000898(F2RL2),ENSBTAG00000001013(SLC30A5),…
BP	GO:0022411	cellular component disassembly	3.4e-08	1.09492e-06	ENSBTAG00000000080(GRWD1),ENSBTAG00000000113(ARHGEF2),ENSBTAG00000000163(DDIT4),ENSBTAG00000000369(EPS8),ENSBTAG00000000878(RB1CC1),ENSBTAG00000001024(ARID1A),ENSBTAG00000001069(TP53),ENSBTAG00000001171(OGFOD1),ENSBTAG00000001320(VPS16),ENSBTAG00000001548(UBQLN4),ENSBTAG00000001637(FUNDC1),ENSBTAG00000001848(KATNB1),ENSBTAG00000001961(MAP1B),ENSBTAG00000001987(SWAP70),ENSBTAG00000002018(EIF5A),EN…
BP	GO:0034504	protein localization to nucleus	3.4e-08	1.09492e-06	ENSBTAG00000000152(RANBP2),ENSBTAG00000000231(BMPR1A),ENSBTAG00000000322(CD2AP),ENSBTAG00000000484(HYAL2),ENSBTAG00000000500(PINX1),ENSBTAG00000000546(TOB1),ENSBTAG00000000771(DNAJB6),ENSBTAG00000001009(HCLS1),ENSBTAG00000001069(TP53),ENSBTAG00000001071(WRAP53),ENSBTAG00000002080(CCN3),ENSBTAG00000002238(ARL2),ENSBTAG00000002350(PIK3R2),ENSBTAG00000002363(SESN2),ENSBTAG00000002458(NUP155),ENSBTAG…
MF	GO:0031267	small GTPase binding	3.5e-08	1.12341e-06	ENSBTAG00000000113(ARHGEF2),ENSBTAG00000000146(FARP1),ENSBTAG00000000152(RANBP2),ENSBTAG00000000369(EPS8),ENSBTAG00000000460(SYTL2),ENSBTAG00000000490(RTKN),ENSBTAG00000000634(MLPH),ENSBTAG00000000684(ARHGEF10L),ENSBTAG00000000711(NDRG1),ENSBTAG00000000737(DMXL2),ENSBTAG00000000897(IQGAP2),ENSBTAG00000001332(MYO1C),ENSBTAG00000001483(SRGAP2),ENSBTAG00000001533(HACE1),ENSBTAG00000001551(PLEKHG3),E…
BP	GO:0007507	heart development	3.5e-08	1.12341e-06	ENSBTAG00000000009(FOXF1),ENSBTAG00000000081(COL4A3BP),ENSBTAG00000000218(MAP2K5),ENSBTAG00000000231(BMPR1A),ENSBTAG00000000305(LMO4),ENSBTAG00000000396(PIM1),ENSBTAG00000000569(HES1),ENSBTAG00000000579(NIPBL),ENSBTAG00000000625(SMAD6),ENSBTAG00000000696(ILK),ENSBTAG00000000700(PARVA),ENSBTAG00000000706(ADAMTS1),ENSBTAG00000000784(MTERF4),ENSBTAG00000000816(PRDM1),ENSBTAG00000000878(RB1CC1),ENSBT…
BP	GO:2001242	regulation of intrinsic apoptotic signaling pathway	3.7e-08	1.1837e-06	ENSBTAG00000000184(EIF2AK3),ENSBTAG00000000312(GRINA),ENSBTAG00000000317(MAPK8IP1),ENSBTAG00000000640(SELENOS),ENSBTAG00000000735(BCL2A1),ENSBTAG00000000753(PIAS4),ENSBTAG00000001014(MAPK7),ENSBTAG00000001069(TP53),ENSBTAG00000001096(PRKRA),ENSBTAG00000001221(NKX3-1),ENSBTAG00000001500(FIGNL1),ENSBTAG00000001817(TMEM161A),ENSBTAG00000002187(SERINC3),ENSBTAG00000003430(EPO),ENSBTAG00000004147(FBH1…
BP	GO:0051604	protein maturation	3.7e-08	1.1837e-06	ENSBTAG00000000124(DHH),ENSBTAG00000000141(NFU1),ENSBTAG00000000224(TSPAN15),ENSBTAG00000000428(BAK1),ENSBTAG00000000475(IMMP1L),ENSBTAG00000000597(TMPRSS15),ENSBTAG00000000746(KAT2B),ENSBTAG00000000874(CAST),ENSBTAG00000000894(PGK1),ENSBTAG00000000902(OGT),ENSBTAG00000001016(NAA35),ENSBTAG00000001027(SERPINH1),ENSBTAG00000001144(NAA20),ENSBTAG00000001244(PLAT),ENSBTAG00000001306(FXN),ENSBTAG0000…
BP	GO:1901615	organic hydroxy compound metabolic process	3.8e-08	1.21369e-06	ENSBTAG00000000301,ENSBTAG00000000442(RBP4),ENSBTAG00000000529(BTBD9),ENSBTAG00000000559(PLTP),ENSBTAG00000000730(GCG),ENSBTAG00000000764(GIPC1),ENSBTAG00000000817(SYNJ2),ENSBTAG00000000831(CTNS),ENSBTAG00000001069(TP53),ENSBTAG00000001249(SULT1B1),ENSBTAG00000001299(CYP7B1),ENSBTAG00000001321(IL1B),ENSBTAG00000001354(INPP5E),ENSBTAG00000001485(PPIP5K2),ENSBTAG00000001592(INSIG1),ENSBTAG000000016…
MF	GO:0003723	RNA binding	4e-08	1.26511e-06	ENSBTAG00000000030(RDM1),ENSBTAG00000000072(TFB2M),ENSBTAG00000000108(KHDC4),ENSBTAG00000000132(EIF4A1),ENSBTAG00000000179(RPUSD1),ENSBTAG00000000197(TRMT10A),ENSBTAG00000000221(RBM34),ENSBTAG00000000241(STAU1),ENSBTAG00000000267(SMG6),ENSBTAG00000000288(UPF2),ENSBTAG00000000371(DIS3L),ENSBTAG00000000392(ASCC1),ENSBTAG00000000399(NANOS3),ENSBTAG00000000423(RBM4B),ENSBTAG00000000435(TARBP2),ENSBTA…
MF	GO:0046914	transition metal ion binding	4e-08	1.26511e-06	ENSBTAG00000000023(RNF2),ENSBTAG00000000064(FEN1),ENSBTAG00000000085(CYP1A2),ENSBTAG00000000092(HIF1AN),ENSBTAG00000000098(SETDB1),ENSBTAG00000000124(DHH),ENSBTAG00000000141(NFU1),ENSBTAG00000000201(LTN1),ENSBTAG00000000223(PPM1B),ENSBTAG00000000229,ENSBTAG00000000251(ALAD),ENSBTAG00000000297(ZNF330),ENSBTAG00000000342(PLOD3),ENSBTAG00000000354(PDE6G),ENSBTAG00000000365(TDP2),ENSBTAG00000000395(A…
BP	GO:0042176	regulation of protein catabolic process	4e-08	1.26511e-06	ENSBTAG00000000251(ALAD),ENSBTAG00000000279(RAB26),ENSBTAG00000000436(TNFAIP3),ENSBTAG00000000660(FAM83D),ENSBTAG00000000764(GIPC1),ENSBTAG00000000778(HSP90AB1),ENSBTAG00000000902(OGT),ENSBTAG00000000944(LPCAT1),ENSBTAG00000001321(IL1B),ENSBTAG00000001514(ASB11),ENSBTAG00000001548(UBQLN4),ENSBTAG00000001776(SIRT2),ENSBTAG00000001835(GJA1),ENSBTAG00000001992(CYP51A1),ENSBTAG00000002033(UBXN2A),ENS…
BP	GO:0043405	regulation of MAP kinase activity	4e-08	1.26511e-06	ENSBTAG00000000128(FGF18),ENSBTAG00000000218(MAP2K5),ENSBTAG00000000354(PDE6G),ENSBTAG00000000411(HGS),ENSBTAG00000000484(HYAL2),ENSBTAG00000000570(RET),ENSBTAG00000001037(MAP4K2),ENSBTAG00000001083(MAP3K20),ENSBTAG00000001321(IL1B),ENSBTAG00000001609(MAP2K6),ENSBTAG00000001729(DUSP10),ENSBTAG00000001774(SPRY2),ENSBTAG00000001809(DUSP21),ENSBTAG00000001815(ARHGEF5),ENSBTAG00000001826(SASH1),ENSBT…
CC	GO:0005635	nuclear envelope	4e-08	1.26511e-06	ENSBTAG00000000022(NUP37),ENSBTAG00000000099(CERS2),ENSBTAG00000000152(RANBP2),ENSBTAG00000000271(MNS1),ENSBTAG00000000275(PARP11),ENSBTAG00000000494(PDE4D),ENSBTAG00000000507(NR4A1),ENSBTAG00000000745(AQP1),ENSBTAG00000000837(PARP1),ENSBTAG00000000871(TRIM27),ENSBTAG00000000878(RB1CC1),ENSBTAG00000001105(ANXA4),ENSBTAG00000001107(CACYBP),ENSBTAG00000001108(GMCL1),ENSBTAG00000001112(SMOX),ENSBTAG…
CC	GO:0070382	exocytic vesicle	4e-08	1.26511e-06	ENSBTAG00000000025(RAB6A),ENSBTAG00000000265(SYNPR),ENSBTAG00000000279(RAB26),ENSBTAG00000000460(SYTL2),ENSBTAG00000000540(RNF112),ENSBTAG00000000737(DMXL2),ENSBTAG00000000764(GIPC1),ENSBTAG00000000799(ICA1),ENSBTAG00000000985(RAB10),ENSBTAG00000001137(CLTA),ENSBTAG00000001192(STX12),ENSBTAG00000001394(TMED9),ENSBTAG00000001599(SV2A),ENSBTAG00000001657(PICALM),ENSBTAG00000001703(SYT13),ENSBTAG000…
BP	GO:0050863	regulation of T cell activation	4.7e-08	1.48168e-06	ENSBTAG00000000095(CD274),ENSBTAG00000000317(MAPK8IP1),ENSBTAG00000000569(HES1),ENSBTAG00000000604(GPNMB),ENSBTAG00000000816(PRDM1),ENSBTAG00000000888(SPTA1),ENSBTAG00000000892(CGAS),ENSBTAG00000001273(NLRP3),ENSBTAG00000001321(IL1B),ENSBTAG00000001508(SH3RF1),ENSBTAG00000001511(BCL6),ENSBTAG00000001729(DUSP10),ENSBTAG00000001805(TWSG1),ENSBTAG00000001906(FANCA),ENSBTAG00000002041(SASH3),ENSBTAG0…
BP	GO:0009617	response to bacterium	4.7e-08	1.48168e-06	ENSBTAG00000000016(LTA),ENSBTAG00000000029(LYZL6),ENSBTAG00000000095(CD274),ENSBTAG00000000344(SPACA3),ENSBTAG00000000415(ERBIN),ENSBTAG00000000436(TNFAIP3),ENSBTAG00000000494(PDE4D),ENSBTAG00000000563(MYD88),ENSBTAG00000000625(SMAD6),ENSBTAG00000000640(SELENOS),ENSBTAG00000000815(EPHA2),ENSBTAG00000000829(SHPK),ENSBTAG00000000962(STAP1),ENSBTAG00000000995(TENT5A),ENSBTAG00000001061(PRKCA),ENSBTA…
BP	GO:0019438	aromatic compound biosynthetic process	4.9e-08	1.53974e-06	ENSBTAG00000000009(FOXF1),ENSBTAG00000000013(PRKAA1),ENSBTAG00000000023(RNF2),ENSBTAG00000000031(TRPV4),ENSBTAG00000000039(SIRT7),ENSBTAG00000000040(MAFG),ENSBTAG00000000054(SNAPC4),ENSBTAG00000000072(TFB2M),ENSBTAG00000000074(NFIA),ENSBTAG00000000077(ADSL),ENSBTAG00000000092(HIF1AN),ENSBTAG00000000098(SETDB1),ENSBTAG00000000113(ARHGEF2),ENSBTAG00000000184(EIF2AK3),ENSBTAG00000000212(NADK),ENSBTA…
BP	GO:0043903	regulation of symbiosis, encompassing mutualism through parasitism	4.9e-08	1.53974e-06	ENSBTAG00000000016(LTA),ENSBTAG00000000188(HS3ST5),ENSBTAG00000000241(STAU1),ENSBTAG00000000435(TARBP2),ENSBTAG00000000504(GTF2B),ENSBTAG00000000563(MYD88),ENSBTAG00000000871(TRIM27),ENSBTAG00000001292(LTF),ENSBTAG00000001659(VPS4A),ENSBTAG00000001752(FUCA2),ENSBTAG00000002175(SRPK2),ENSBTAG00000002253(FKBP6),ENSBTAG00000002896(KPNA6),ENSBTAG00000003021(SP1),ENSBTAG00000003255(CD4),ENSBTAG0000000…
BP	GO:0006417	regulation of translation	5.1e-08	1.59486e-06	ENSBTAG00000000184(EIF2AK3),ENSBTAG00000000201(LTN1),ENSBTAG00000000285(GUF1),ENSBTAG00000000399(NANOS3),ENSBTAG00000000423(RBM4B),ENSBTAG00000000435(TARBP2),ENSBTAG00000000502(DAZL),ENSBTAG00000000546(TOB1),ENSBTAG00000000555(ACO1),ENSBTAG00000000613(ELAVL1),ENSBTAG00000000623,ENSBTAG00000000630(LSM14A),ENSBTAG00000000738(DAPK1),ENSBTAG00000001069(TP53),ENSBTAG00000001096(PRKRA),ENSBTAG000000011…
BP	GO:0032388	positive regulation of intracellular transport	5.1e-08	1.59486e-06	ENSBTAG00000000013(PRKAA1),ENSBTAG00000000231(BMPR1A),ENSBTAG00000000484(HYAL2),ENSBTAG00000000854(SEC16B),ENSBTAG00000001009(HCLS1),ENSBTAG00000001015(TM9SF4),ENSBTAG00000001050(LDLRAP1),ENSBTAG00000001332(MYO1C),ENSBTAG00000001400(AKT2),ENSBTAG00000001673(C2CD5),ENSBTAG00000002297(CACNB4),ENSBTAG00000002350(PIK3R2),ENSBTAG00000002554(TCAF1),ENSBTAG00000002650(ZPR1),ENSBTAG00000002774(PTPN23),EN…
CC	GO:0044437	vacuolar part	5.1e-08	1.59486e-06	ENSBTAG00000000026(VPS33B),ENSBTAG00000000133(CD68),ENSBTAG00000000203(ATP6V1G1),ENSBTAG00000000292(TCIRG1),ENSBTAG00000000344(SPACA3),ENSBTAG00000000564(NSG2),ENSBTAG00000000831(CTNS),ENSBTAG00000001269(TMEM165),ENSBTAG00000001295(DEPDC5),ENSBTAG00000001320(VPS16),ENSBTAG00000001908(DLD),ENSBTAG00000001927(ATP6V1C2),ENSBTAG00000001948(VTI1B),ENSBTAG00000002703(ATP6V1A),ENSBTAG00000002748(PIP4P1)…
BP	GO:0070848	response to growth factor	5.9e-08	1.83912e-06	ENSBTAG00000000128(FGF18),ENSBTAG00000000163(DDIT4),ENSBTAG00000000231(BMPR1A),ENSBTAG00000000411(HGS),ENSBTAG00000000483(HYAL1),ENSBTAG00000000484(HYAL2),ENSBTAG00000000541(NKX2-1),ENSBTAG00000000546(TOB1),ENSBTAG00000000569(HES1),ENSBTAG00000000625(SMAD6),ENSBTAG00000000696(ILK),ENSBTAG00000000731(WFIKKN2),ENSBTAG00000000764(GIPC1),ENSBTAG00000000778(HSP90AB1),ENSBTAG00000000782(KDR),ENSBTAG000…
BP	GO:0140014	mitotic nuclear division	5.9e-08	1.83912e-06	ENSBTAG00000000039(SIRT7),ENSBTAG00000000369(EPS8),ENSBTAG00000000500(PINX1),ENSBTAG00000000579(NIPBL),ENSBTAG00000000599(CCNI),ENSBTAG00000000752(SGO1),ENSBTAG00000000981(KLHDC8B),ENSBTAG00000001321(IL1B),ENSBTAG00000001323(CENPC),ENSBTAG00000001463(TNKS),ENSBTAG00000001631(KIFC1),ENSBTAG00000001698(CHTF8),ENSBTAG00000001700(CDC42),ENSBTAG00000001717(AURKB),ENSBTAG00000001848(KATNB1),ENSBTAG0000…
MF	GO:0050839	cell adhesion molecule binding	6.2e-08	1.92646e-06	ENSBTAG00000000253(PTPRF),ENSBTAG00000000604(GPNMB),ENSBTAG00000000707(CCN4),ENSBTAG00000000711(NDRG1),ENSBTAG00000000782(KDR),ENSBTAG00000001321(IL1B),ENSBTAG00000001739(CDH20),ENSBTAG00000002006(THBS1),ENSBTAG00000002048(PTPN11),ENSBTAG00000002080(CCN3),ENSBTAG00000002278(FBN1),ENSBTAG00000002317(PTN),ENSBTAG00000002411(CTNND1),ENSBTAG00000002651(PKP2),ENSBTAG00000002738(S1PR2),ENSBTAG000000028…
BP	GO:0009991	response to extracellular stimulus	6.2e-08	1.92646e-06	ENSBTAG00000000013(PRKAA1),ENSBTAG00000000031(TRPV4),ENSBTAG00000000184(EIF2AK3),ENSBTAG00000000321(TBL2),ENSBTAG00000000396(PIM1),ENSBTAG00000000697(RRP8),ENSBTAG00000000759(NENF),ENSBTAG00000001030(MTMR3),ENSBTAG00000001069(TP53),ENSBTAG00000001295(DEPDC5),ENSBTAG00000001776(SIRT2),ENSBTAG00000001936(PCK1),ENSBTAG00000002144(ADRB2),ENSBTAG00000002216(MYOD1),ENSBTAG00000002363(SESN2),ENSBTAG0000…
BP	GO:0009887	animal organ morphogenesis	6.3e-08	1.95441e-06	ENSBTAG00000000009(FOXF1),ENSBTAG00000000031(TRPV4),ENSBTAG00000000033(PHOSPHO1),ENSBTAG00000000057(THBS3),ENSBTAG00000000081(COL4A3BP),ENSBTAG00000000128(FGF18),ENSBTAG00000000225(POLB),ENSBTAG00000000231(BMPR1A),ENSBTAG00000000266(NAB1),ENSBTAG00000000283(CSF1),ENSBTAG00000000292(TCIRG1),ENSBTAG00000000342(PLOD3),ENSBTAG00000000396(PIM1),ENSBTAG00000000422(TSHZ1),ENSBTAG00000000428(BAK1),ENSBTA…
MF	GO:0140110	transcription regulator activity	6.4e-08	1.98227e-06	ENSBTAG00000000009(FOXF1),ENSBTAG00000000040(MAFG),ENSBTAG00000000072(TFB2M),ENSBTAG00000000074(NFIA),ENSBTAG00000000231(BMPR1A),ENSBTAG00000000264(RFX6),ENSBTAG00000000266(NAB1),ENSBTAG00000000332(ERF),ENSBTAG00000000382(MED27),ENSBTAG00000000385(ZBTB18),ENSBTAG00000000455(CREBZF),ENSBTAG00000000484(HYAL2),ENSBTAG00000000504(GTF2B),ENSBTAG00000000507(NR4A1),ENSBTAG00000000541(NKX2-1),ENSBTAG0000…
BP	GO:0002237	response to molecule of bacterial origin	6.6e-08	2.04096e-06	ENSBTAG00000000095(CD274),ENSBTAG00000000415(ERBIN),ENSBTAG00000000436(TNFAIP3),ENSBTAG00000000494(PDE4D),ENSBTAG00000000563(MYD88),ENSBTAG00000000625(SMAD6),ENSBTAG00000000640(SELENOS),ENSBTAG00000000829(SHPK),ENSBTAG00000000962(STAP1),ENSBTAG00000001061(PRKCA),ENSBTAG00000001273(NLRP3),ENSBTAG00000001292(LTF),ENSBTAG00000001321(IL1B),ENSBTAG00000001725(CXCL10),ENSBTAG00000001729(DUSP10),ENSBTAG…
MF	GO:0001228	transcriptional activator activity, RNA polymerase II transcription regulatory region sequence-specific binding	6.7e-08	2.0686e-06	ENSBTAG00000000009(FOXF1),ENSBTAG00000000040(MAFG),ENSBTAG00000000074(NFIA),ENSBTAG00000000264(RFX6),ENSBTAG00000000507(NR4A1),ENSBTAG00000000558(NEUROD6),ENSBTAG00000000602(RXRB),ENSBTAG00000000837(PARP1),ENSBTAG00000000923(HOXC13),ENSBTAG00000001063(HOXA4),ENSBTAG00000001069(TP53),ENSBTAG00000001160(GMEB1),ENSBTAG00000001250(TFAP2A),ENSBTAG00000001509(ELK3),ENSBTAG00000001755(NEUROD1),ENSBTAG00…
BP	GO:0046890	regulation of lipid biosynthetic process	6.8e-08	2.09283e-06	ENSBTAG00000000124(DHH),ENSBTAG00000000944(LPCAT1),ENSBTAG00000001035(SF1),ENSBTAG00000001246(ATP1A1),ENSBTAG00000001321(IL1B),ENSBTAG00000001592(INSIG1),ENSBTAG00000003072(ACADVL),ENSBTAG00000003359(ELOVL5),ENSBTAG00000004347(ADGRF5),ENSBTAG00000005045(GIP),ENSBTAG00000005111(BMP2),ENSBTAG00000005198(FGF1),ENSBTAG00000005287(CYP7A1),ENSBTAG00000005474(CREB1),ENSBTAG00000006191(SERPINA12),ENSBTAG…
BP	GO:0070374	positive regulation of ERK1 and ERK2 cascade	6.8e-08	2.09283e-06	ENSBTAG00000000031(TRPV4),ENSBTAG00000000078(GLIPR2),ENSBTAG00000000128(FGF18),ENSBTAG00000000437(FFAR4),ENSBTAG00000000476(THPO),ENSBTAG00000000604(GPNMB),ENSBTAG00000000730(GCG),ENSBTAG00000000782(KDR),ENSBTAG00000001191(CCL17),ENSBTAG00000001462(FLT4),ENSBTAG00000001774(SPRY2),ENSBTAG00000002048(PTPN11),ENSBTAG00000002699(KIT),ENSBTAG00000002700(PLA2G2A),ENSBTAG00000002804(PDGFRB),ENSBTAG00000…
MF	GO:0000976	transcription regulatory region sequence-specific DNA binding	7e-08	2.1442e-06	ENSBTAG00000000009(FOXF1),ENSBTAG00000000040(MAFG),ENSBTAG00000000074(NFIA),ENSBTAG00000000264(RFX6),ENSBTAG00000000305(LMO4),ENSBTAG00000000504(GTF2B),ENSBTAG00000000507(NR4A1),ENSBTAG00000000536(ZNF395),ENSBTAG00000000541(NKX2-1),ENSBTAG00000000558(NEUROD6),ENSBTAG00000000565(RFX7),ENSBTAG00000000569(HES1),ENSBTAG00000000602(RXRB),ENSBTAG00000000625(SMAD6),ENSBTAG00000000656(NFATC1),ENSBTAG0000…
MF	GO:0001012	RNA polymerase II regulatory region DNA binding	7e-08	2.1442e-06	ENSBTAG00000000009(FOXF1),ENSBTAG00000000040(MAFG),ENSBTAG00000000074(NFIA),ENSBTAG00000000264(RFX6),ENSBTAG00000000504(GTF2B),ENSBTAG00000000507(NR4A1),ENSBTAG00000000536(ZNF395),ENSBTAG00000000541(NKX2-1),ENSBTAG00000000558(NEUROD6),ENSBTAG00000000565(RFX7),ENSBTAG00000000569(HES1),ENSBTAG00000000602(RXRB),ENSBTAG00000000625(SMAD6),ENSBTAG00000000656(NFATC1),ENSBTAG00000000746(KAT2B),ENSBTAG000…
BP	GO:0030258	lipid modification	7e-08	2.1442e-06	ENSBTAG00000000013(PRKAA1),ENSBTAG00000000123(HAO2),ENSBTAG00000000710(PIP5K1C),ENSBTAG00000000717(PLPP2),ENSBTAG00000000817(SYNJ2),ENSBTAG00000001021(CYP1A1),ENSBTAG00000001030(MTMR3),ENSBTAG00000001354(INPP5E),ENSBTAG00000001400(AKT2),ENSBTAG00000001864(NR4A3),ENSBTAG00000002010(PI4K2A),ENSBTAG00000002350(PIK3R2),ENSBTAG00000002363(SESN2),ENSBTAG00000002526(BDH2),ENSBTAG00000002748(PIP4P1),ENSB…
BP	GO:0030855	epithelial cell differentiation	7.4e-08	2.26317e-06	ENSBTAG00000000009(FOXF1),ENSBTAG00000000040(MAFG),ENSBTAG00000000182(SPINT2),ENSBTAG00000000222(ARID4B),ENSBTAG00000000264(RFX6),ENSBTAG00000000342(PLOD3),ENSBTAG00000000541(NKX2-1),ENSBTAG00000000563(MYD88),ENSBTAG00000000569(HES1),ENSBTAG00000000653(PPP1R16B),ENSBTAG00000000694(TAF10),ENSBTAG00000000782(KDR),ENSBTAG00000000815(EPHA2),ENSBTAG00000000816(PRDM1),ENSBTAG00000000819(RFX3),ENSBTAG00…
MF	GO:0030674	protein binding, bridging	8.1e-08	2.46177e-06	ENSBTAG00000000634(MLPH),ENSBTAG00000000962(STAP1),ENSBTAG00000001050(LDLRAP1),ENSBTAG00000001847(CNTLN),ENSBTAG00000002048(PTPN11),ENSBTAG00000002072(ERCC2),ENSBTAG00000002095(MEN1),ENSBTAG00000002105(TEX261),ENSBTAG00000002147(PPP4R2),ENSBTAG00000002883(RPTOR),ENSBTAG00000002922(GAB2),ENSBTAG00000003034(GATAD2A),ENSBTAG00000003075(DVL2),ENSBTAG00000003191(FSCN1),ENSBTAG00000003341(DOK2),ENSBTAG…
BP	GO:0016053	organic acid biosynthetic process	8.1e-08	2.46177e-06	ENSBTAG00000000042(PYCR1),ENSBTAG00000000160(CBS),ENSBTAG00000000342(PLOD3),ENSBTAG00000000483(HYAL1),ENSBTAG00000000492(ASNSD1),ENSBTAG00000000497(AKR1A1),ENSBTAG00000000686(NANP),ENSBTAG00000000730(GCG),ENSBTAG00000001299(CYP7B1),ENSBTAG00000001321(IL1B),ENSBTAG00000001325(UPB1),ENSBTAG00000001417(ACSM1),ENSBTAG00000001488(OTC),ENSBTAG00000001592(INSIG1),ENSBTAG00000001727(PRXL2B),ENSBTAG000000…
BP	GO:0031667	response to nutrient levels	8.1e-08	2.46177e-06	ENSBTAG00000000013(PRKAA1),ENSBTAG00000000031(TRPV4),ENSBTAG00000000184(EIF2AK3),ENSBTAG00000000321(TBL2),ENSBTAG00000000396(PIM1),ENSBTAG00000000697(RRP8),ENSBTAG00000000759(NENF),ENSBTAG00000001030(MTMR3),ENSBTAG00000001069(TP53),ENSBTAG00000001295(DEPDC5),ENSBTAG00000001776(SIRT2),ENSBTAG00000001936(PCK1),ENSBTAG00000002144(ADRB2),ENSBTAG00000002216(MYOD1),ENSBTAG00000002363(SESN2),ENSBTAG0000…
BP	GO:0046394	carboxylic acid biosynthetic process	8.1e-08	2.46177e-06	ENSBTAG00000000042(PYCR1),ENSBTAG00000000160(CBS),ENSBTAG00000000342(PLOD3),ENSBTAG00000000483(HYAL1),ENSBTAG00000000492(ASNSD1),ENSBTAG00000000497(AKR1A1),ENSBTAG00000000686(NANP),ENSBTAG00000000730(GCG),ENSBTAG00000001299(CYP7B1),ENSBTAG00000001321(IL1B),ENSBTAG00000001325(UPB1),ENSBTAG00000001417(ACSM1),ENSBTAG00000001488(OTC),ENSBTAG00000001592(INSIG1),ENSBTAG00000001727(PRXL2B),ENSBTAG000000…
BP	GO:0120036	plasma membrane bounded cell projection organization	8.2e-08	2.48827e-06	ENSBTAG00000000056(STRADA),ENSBTAG00000000088(ALCAM),ENSBTAG00000000109(NPTXR),ENSBTAG00000000137(FRYL),ENSBTAG00000000253(PTPRF),ENSBTAG00000000271(MNS1),ENSBTAG00000000347(RHOG),ENSBTAG00000000369(EPS8),ENSBTAG00000000413(NRTN),ENSBTAG00000000541(NKX2-1),ENSBTAG00000000569(HES1),ENSBTAG00000000570(RET),ENSBTAG00000000575(TNC),ENSBTAG00000000588(CHODL),ENSBTAG00000000653(PPP1R16B),ENSBTAG0000000…
BP	GO:0032102	negative regulation of response to external stimulus	8.4e-08	2.54499e-06	ENSBTAG00000000009(FOXF1),ENSBTAG00000000223(PPM1B),ENSBTAG00000000435(TARBP2),ENSBTAG00000000436(TNFAIP3),ENSBTAG00000000437(FFAR4),ENSBTAG00000000640(SELENOS),ENSBTAG00000000759(NENF),ENSBTAG00000000842(UBASH3B),ENSBTAG00000000962(STAP1),ENSBTAG00000001209(PHLDB2),ENSBTAG00000001241(ISL1),ENSBTAG00000001271(PLG),ENSBTAG00000001273(NLRP3),ENSBTAG00000001292(LTF),ENSBTAG00000001694(TYRO3),ENSBTAG…
BP	GO:0034654	nucleobase-containing compound biosynthetic process	8.7e-08	2.63178e-06	ENSBTAG00000000009(FOXF1),ENSBTAG00000000013(PRKAA1),ENSBTAG00000000023(RNF2),ENSBTAG00000000031(TRPV4),ENSBTAG00000000039(SIRT7),ENSBTAG00000000040(MAFG),ENSBTAG00000000054(SNAPC4),ENSBTAG00000000072(TFB2M),ENSBTAG00000000074(NFIA),ENSBTAG00000000077(ADSL),ENSBTAG00000000092(HIF1AN),ENSBTAG00000000098(SETDB1),ENSBTAG00000000113(ARHGEF2),ENSBTAG00000000184(EIF2AK3),ENSBTAG00000000212(NADK),ENSBTA…
BP	GO:0043112	receptor metabolic process	9.1e-08	2.74851e-06	ENSBTAG00000000005(GRK3),ENSBTAG00000000073(LRPAP1),ENSBTAG00000000791(CALY),ENSBTAG00000000806(ATAD1),ENSBTAG00000001050(LDLRAP1),ENSBTAG00000001139(ACHE),ENSBTAG00000001333(PPARG),ENSBTAG00000001404(CACNG3),ENSBTAG00000001505(GRK4),ENSBTAG00000001647(PLEKHJ1),ENSBTAG00000001657(PICALM),ENSBTAG00000001662(EHD3),ENSBTAG00000002014(SNX1),ENSBTAG00000002475(RAB11B),ENSBTAG00000002939(FURIN),ENSBTAG…
CC	GO:0031301	integral component of organelle membrane	9.2e-08	2.77441e-06	ENSBTAG00000000202(SLC25A19),ENSBTAG00000000390(TPST1),ENSBTAG00000000428(BAK1),ENSBTAG00000000562(TOMM20),ENSBTAG00000001192(STX12),ENSBTAG00000001475(MCUR1),ENSBTAG00000001637(FUNDC1),ENSBTAG00000001744(BET1L),ENSBTAG00000001781(TOMM40),ENSBTAG00000001801(SYT4),ENSBTAG00000002105(TEX261),ENSBTAG00000002305(PCSK4),ENSBTAG00000002522(SYT5),ENSBTAG00000002599(MGARP),ENSBTAG00000002939(FURIN),ENSBT…
BP	GO:0042063	gliogenesis	1e-07	2.99246e-06	ENSBTAG00000000266(NAB1),ENSBTAG00000000283(CSF1),ENSBTAG00000000540(RNF112),ENSBTAG00000000541(NKX2-1),ENSBTAG00000000569(HES1),ENSBTAG00000000696(ILK),ENSBTAG00000000711(NDRG1),ENSBTAG00000000962(STAP1),ENSBTAG00000001321(IL1B),ENSBTAG00000001400(AKT2),ENSBTAG00000001403(PRKCI),ENSBTAG00000001483(SRGAP2),ENSBTAG00000001729(DUSP10),ENSBTAG00000001776(SIRT2),ENSBTAG00000001866(EMX1),ENSBTAG000000…
BP	GO:0022604	regulation of cell morphogenesis	1e-07	2.99246e-06	ENSBTAG00000000347(RHOG),ENSBTAG00000000369(EPS8),ENSBTAG00000000570(RET),ENSBTAG00000000588(CHODL),ENSBTAG00000000782(KDR),ENSBTAG00000000888(SPTA1),ENSBTAG00000001028(MAP6),ENSBTAG00000001173(PLXNA2),ENSBTAG00000001700(CDC42),ENSBTAG00000001801(SYT4),ENSBTAG00000001870(CPNE6),ENSBTAG00000001941(SEMA4D),ENSBTAG00000001961(MAP1B),ENSBTAG00000002518(NKX6-1),ENSBTAG00000002527(ZSWIM4),ENSBTAG000000…
BP	GO:0030162	regulation of proteolysis	1e-07	2.99246e-06	ENSBTAG00000000076(RECK),ENSBTAG00000000182(SPINT2),ENSBTAG00000000251(ALAD),ENSBTAG00000000428(BAK1),ENSBTAG00000000507(NR4A1),ENSBTAG00000000522(AHSG),ENSBTAG00000000598(CST3),ENSBTAG00000000731(WFIKKN2),ENSBTAG00000000738(DAPK1),ENSBTAG00000000764(GIPC1),ENSBTAG00000000771(DNAJB6),ENSBTAG00000000778(HSP90AB1),ENSBTAG00000000874(CAST),ENSBTAG00000000902(OGT),ENSBTAG00000001027(SERPINH1),ENSBTAG…
BP	GO:0050727	regulation of inflammatory response	1e-07	2.99246e-06	ENSBTAG00000000009(FOXF1),ENSBTAG00000000016(LTA),ENSBTAG00000000031(TRPV4),ENSBTAG00000000436(TNFAIP3),ENSBTAG00000000437(FFAR4),ENSBTAG00000000484(HYAL2),ENSBTAG00000000522(AHSG),ENSBTAG00000000563(MYD88),ENSBTAG00000000640(SELENOS),ENSBTAG00000000829(SHPK),ENSBTAG00000001241(ISL1),ENSBTAG00000001273(NLRP3),ENSBTAG00000001321(IL1B),ENSBTAG00000001511(BCL6),ENSBTAG00000001694(TYRO3),ENSBTAG00000…
BP	GO:0051046	regulation of secretion	1e-07	2.99246e-06	ENSBTAG00000000009(FOXF1),ENSBTAG00000000031(TRPV4),ENSBTAG00000000095(CD274),ENSBTAG00000000259(CHIA),ENSBTAG00000000264(RFX6),ENSBTAG00000000279(RAB26),ENSBTAG00000000286(PFKM),ENSBTAG00000000292(TCIRG1),ENSBTAG00000000322(CD2AP),ENSBTAG00000000411(HGS),ENSBTAG00000000436(TNFAIP3),ENSBTAG00000000437(FFAR4),ENSBTAG00000000442(RBP4),ENSBTAG00000000460(SYTL2),ENSBTAG00000000484(HYAL2),ENSBTAG00000…
CC	GO:0044459	plasma membrane part	1.1e-07	3.28665e-06	ENSBTAG00000000020(TRPV3),ENSBTAG00000000031(TRPV4),ENSBTAG00000000061(PCDH7),ENSBTAG00000000088(ALCAM),ENSBTAG00000000095(CD274),ENSBTAG00000000109(NPTXR),ENSBTAG00000000113(ARHGEF2),ENSBTAG00000000153(LRFN3),ENSBTAG00000000215(GNB1),ENSBTAG00000000224(TSPAN15),ENSBTAG00000000231(BMPR1A),ENSBTAG00000000273(IL5RA),ENSBTAG00000000274(YKT6),ENSBTAG00000000279(RAB26),ENSBTAG00000000286(PFKM),ENSBTAG…
BP	GO:0001649	osteoblast differentiation	1.2e-07	3.56899e-06	ENSBTAG00000000124(DHH),ENSBTAG00000000231(BMPR1A),ENSBTAG00000000292(TCIRG1),ENSBTAG00000000546(TOB1),ENSBTAG00000000625(SMAD6),ENSBTAG00000000696(ILK),ENSBTAG00000000815(EPHA2),ENSBTAG00000001019(GDF10),ENSBTAG00000001086(FHL2),ENSBTAG00000001139(ACHE),ENSBTAG00000001292(LTF),ENSBTAG00000001500(FIGNL1),ENSBTAG00000001632(NBR1),ENSBTAG00000001805(TWSG1),ENSBTAG00000001835(GJA1),ENSBTAG0000000194…
BP	GO:0060537	muscle tissue development	1.2e-07	3.56899e-06	ENSBTAG00000000013(PRKAA1),ENSBTAG00000000231(BMPR1A),ENSBTAG00000000329(MEGF10),ENSBTAG00000000396(PIM1),ENSBTAG00000000507(NR4A1),ENSBTAG00000000919(HEY2),ENSBTAG00000000992(BMP10),ENSBTAG00000001024(ARID1A),ENSBTAG00000001058(SRPK3),ENSBTAG00000001086(FHL2),ENSBTAG00000001241(ISL1),ENSBTAG00000001539(SAV1),ENSBTAG00000001700(CDC42),ENSBTAG00000001776(SIRT2),ENSBTAG00000001835(GJA1),ENSBTAG0000…
CC	GO:0005667	transcription factor complex	1.2e-07	3.56899e-06	ENSBTAG00000000054(SNAPC4),ENSBTAG00000000305(LMO4),ENSBTAG00000000382(MED27),ENSBTAG00000000392(ASCC1),ENSBTAG00000000484(HYAL2),ENSBTAG00000000504(GTF2B),ENSBTAG00000000507(NR4A1),ENSBTAG00000000541(NKX2-1),ENSBTAG00000000625(SMAD6),ENSBTAG00000000656(NFATC1),ENSBTAG00000000694(TAF10),ENSBTAG00000000837(PARP1),ENSBTAG00000000895(TAF9B),ENSBTAG00000001002(TCF7),ENSBTAG00000001009(HCLS1),ENSBTAG0…
BP	GO:0000045	autophagosome assembly	1.3e-07	3.85462e-06	ENSBTAG00000000510(ATG101),ENSBTAG00000000878(RB1CC1),ENSBTAG00000001030(MTMR3),ENSBTAG00000001192(STX12),ENSBTAG00000001607(TMEM41B),ENSBTAG00000002033(UBXN2A),ENSBTAG00000002563(WDR45),ENSBTAG00000003208(RAB33B),ENSBTAG00000003695(WDR45B),ENSBTAG00000003928(ATG16L1),ENSBTAG00000003942(PIP4K2C),ENSBTAG00000004282(AMBRA1),ENSBTAG00000005314(MFN2),ENSBTAG00000005362(RAB23),ENSBTAG00000005400(ATG5)…
BP	GO:0044270	cellular nitrogen compound catabolic process	1.3e-07	3.85462e-06	ENSBTAG00000000064(FEN1),ENSBTAG00000000267(SMG6),ENSBTAG00000000288(UPF2),ENSBTAG00000000371(DIS3L),ENSBTAG00000000399(NANOS3),ENSBTAG00000000494(PDE4D),ENSBTAG00000000502(DAZL),ENSBTAG00000000546(TOB1),ENSBTAG00000000613(ELAVL1),ENSBTAG00000000678(CSDE1),ENSBTAG00000001044(SUPV3L1),ENSBTAG00000001325(UPB1),ENSBTAG00000001468(SAMD4A),ENSBTAG00000001546(MGAT1),ENSBTAG00000001612(LSM1),ENSBTAG0000…
BP	GO:1901214	regulation of neuron death	1.4e-07	4.12597e-06	ENSBTAG00000000102(GPR75),ENSBTAG00000000163(DDIT4),ENSBTAG00000000283(CSF1),ENSBTAG00000000340(ADNP),ENSBTAG00000000418(TOX3),ENSBTAG00000000604(GPNMB),ENSBTAG00000001069(TP53),ENSBTAG00000001241(ISL1),ENSBTAG00000001403(PRKCI),ENSBTAG00000001657(PICALM),ENSBTAG00000001694(TYRO3),ENSBTAG00000001864(NR4A3),ENSBTAG00000002107(FZD1),ENSBTAG00000002471(CHL1),ENSBTAG00000002472(CASP9),ENSBTAG00000002…
BP	GO:0007034	vacuolar transport	1.4e-07	4.12597e-06	ENSBTAG00000000411(HGS),ENSBTAG00000000704(GUSB),ENSBTAG00000001258(TMEM50B),ENSBTAG00000001296(TMEM50A),ENSBTAG00000001320(VPS16),ENSBTAG00000001404(CACNG3),ENSBTAG00000001662(EHD3),ENSBTAG00000001819(CDX2),ENSBTAG00000001942(SNX27),ENSBTAG00000001948(VTI1B),ENSBTAG00000002402(IGF2R),ENSBTAG00000002493(VPS35),ENSBTAG00000002643(VPS52),ENSBTAG00000002769(AP1G1),ENSBTAG00000002881(AP4M1),ENSBTAG00…
BP	GO:0050776	regulation of immune response	1.4e-07	4.12597e-06	ENSBTAG00000000009(FOXF1),ENSBTAG00000000016(LTA),ENSBTAG00000000095(CD274),ENSBTAG00000000130(TNFSF13),ENSBTAG00000000306(ITK),ENSBTAG00000000377(BMX),ENSBTAG00000000415(ERBIN),ENSBTAG00000000436(TNFAIP3),ENSBTAG00000000494(PDE4D),ENSBTAG00000000563(MYD88),ENSBTAG00000000630(LSM14A),ENSBTAG00000000640(SELENOS),ENSBTAG00000000778(HSP90AB1),ENSBTAG00000000871(TRIM27),ENSBTAG00000000892(CGAS),ENSBT…
CC	GO:0005774	vacuolar membrane	1.4e-07	4.12597e-06	ENSBTAG00000000026(VPS33B),ENSBTAG00000000133(CD68),ENSBTAG00000000203(ATP6V1G1),ENSBTAG00000000292(TCIRG1),ENSBTAG00000000831(CTNS),ENSBTAG00000001269(TMEM165),ENSBTAG00000001295(DEPDC5),ENSBTAG00000001320(VPS16),ENSBTAG00000001927(ATP6V1C2),ENSBTAG00000001948(VTI1B),ENSBTAG00000002703(ATP6V1A),ENSBTAG00000002748(PIP4P1),ENSBTAG00000002854(TMEM63A),ENSBTAG00000003001(LAMTOR1),ENSBTAG00000003288(…
MF	GO:0000977	RNA polymerase II regulatory region sequence-specific DNA binding	1.5e-07	4.38086e-06	ENSBTAG00000000009(FOXF1),ENSBTAG00000000040(MAFG),ENSBTAG00000000074(NFIA),ENSBTAG00000000264(RFX6),ENSBTAG00000000504(GTF2B),ENSBTAG00000000507(NR4A1),ENSBTAG00000000536(ZNF395),ENSBTAG00000000541(NKX2-1),ENSBTAG00000000558(NEUROD6),ENSBTAG00000000565(RFX7),ENSBTAG00000000569(HES1),ENSBTAG00000000602(RXRB),ENSBTAG00000000625(SMAD6),ENSBTAG00000000656(NFATC1),ENSBTAG00000000746(KAT2B),ENSBTAG000…
BP	GO:0030278	regulation of ossification	1.5e-07	4.38086e-06	ENSBTAG00000000231(BMPR1A),ENSBTAG00000000283(CSF1),ENSBTAG00000000292(TCIRG1),ENSBTAG00000000522(AHSG),ENSBTAG00000000546(TOB1),ENSBTAG00000000579(NIPBL),ENSBTAG00000000625(SMAD6),ENSBTAG00000000696(ILK),ENSBTAG00000001019(GDF10),ENSBTAG00000001126(BMP2K),ENSBTAG00000001250(TFAP2A),ENSBTAG00000001292(LTF),ENSBTAG00000001632(NBR1),ENSBTAG00000001768(TXLNG),ENSBTAG00000001805(TWSG1),ENSBTAG0000000…
BP	GO:1903706	regulation of hemopoiesis	1.5e-07	4.38086e-06	ENSBTAG00000000283(CSF1),ENSBTAG00000000396(PIM1),ENSBTAG00000000476(THPO),ENSBTAG00000000569(HES1),ENSBTAG00000000816(PRDM1),ENSBTAG00000000842(UBASH3B),ENSBTAG00000001009(HCLS1),ENSBTAG00000001273(NLRP3),ENSBTAG00000001292(LTF),ENSBTAG00000001508(SH3RF1),ENSBTAG00000001511(BCL6),ENSBTAG00000001729(DUSP10),ENSBTAG00000001906(FANCA),ENSBTAG00000002041(SASH3),ENSBTAG00000002150(IL17A),ENSBTAG00000…
BP	GO:0008015	blood circulation	1.5e-07	4.38086e-06	ENSBTAG00000000031(TRPV4),ENSBTAG00000000342(PLOD3),ENSBTAG00000000494(PDE4D),ENSBTAG00000000512(SNTA1),ENSBTAG00000000919(HEY2),ENSBTAG00000000965(TNNI3K),ENSBTAG00000000992(BMP10),ENSBTAG00000001150(KCNE1),ENSBTAG00000001246(ATP1A1),ENSBTAG00000001333(PPARG),ENSBTAG00000001398(ATP2A2),ENSBTAG00000001575(CALM2),ENSBTAG00000001609(MAP2K6),ENSBTAG00000001662(EHD3),ENSBTAG00000001687(STC1),ENSBTAG0…
BP	GO:0071216	cellular response to biotic stimulus	1.5e-07	4.38086e-06	ENSBTAG00000000095(CD274),ENSBTAG00000000184(EIF2AK3),ENSBTAG00000000436(TNFAIP3),ENSBTAG00000000494(PDE4D),ENSBTAG00000000563(MYD88),ENSBTAG00000000640(SELENOS),ENSBTAG00000000829(SHPK),ENSBTAG00000000962(STAP1),ENSBTAG00000001061(PRKCA),ENSBTAG00000001069(TP53),ENSBTAG00000001273(NLRP3),ENSBTAG00000001292(LTF),ENSBTAG00000001321(IL1B),ENSBTAG00000001725(CXCL10),ENSBTAG00000001776(SIRT2),ENSBTAG…
BP	GO:0002685	regulation of leukocyte migration	1.5e-07	4.38086e-06	ENSBTAG00000000031(TRPV4),ENSBTAG00000000283(CSF1),ENSBTAG00000000563(MYD88),ENSBTAG00000000962(STAP1),ENSBTAG00000001557(CCL28),ENSBTAG00000001725(CXCL10),ENSBTAG00000001987(SWAP70),ENSBTAG00000002080(CCN3),ENSBTAG00000002190(DOCK8),ENSBTAG00000002240(GPR18),ENSBTAG00000002326(LGALS3),ENSBTAG00000002959(LRCH1),ENSBTAG00000003176(JAM3),ENSBTAG00000003418(MSN),ENSBTAG00000003806(ECM1),ENSBTAG00000…
MF	GO:1901363	heterocyclic compound binding	1.6e-07	4.65196e-06	ENSBTAG00000000005(GRK3),ENSBTAG00000000009(FOXF1),ENSBTAG00000000013(PRKAA1),ENSBTAG00000000025(RAB6A),ENSBTAG00000000030(RDM1),ENSBTAG00000000039(SIRT7),ENSBTAG00000000040(MAFG),ENSBTAG00000000054(SNAPC4),ENSBTAG00000000056(STRADA),ENSBTAG00000000062(RASL12),ENSBTAG00000000064(FEN1),ENSBTAG00000000072(TFB2M),ENSBTAG00000000074(NFIA),ENSBTAG00000000080(GRWD1),ENSBTAG00000000085(CYP1A2),ENSBTAG00…
BP	GO:1901361	organic cyclic compound catabolic process	1.6e-07	4.65196e-06	ENSBTAG00000000064(FEN1),ENSBTAG00000000085(CYP1A2),ENSBTAG00000000267(SMG6),ENSBTAG00000000288(UPF2),ENSBTAG00000000371(DIS3L),ENSBTAG00000000399(NANOS3),ENSBTAG00000000494(PDE4D),ENSBTAG00000000502(DAZL),ENSBTAG00000000546(TOB1),ENSBTAG00000000613(ELAVL1),ENSBTAG00000000678(CSDE1),ENSBTAG00000001044(SUPV3L1),ENSBTAG00000001325(UPB1),ENSBTAG00000001468(SAMD4A),ENSBTAG00000001546(MGAT1),ENSBTAG00…
BP	GO:0003013	circulatory system process	1.6e-07	4.65196e-06	ENSBTAG00000000031(TRPV4),ENSBTAG00000000342(PLOD3),ENSBTAG00000000494(PDE4D),ENSBTAG00000000512(SNTA1),ENSBTAG00000000919(HEY2),ENSBTAG00000000965(TNNI3K),ENSBTAG00000000992(BMP10),ENSBTAG00000001150(KCNE1),ENSBTAG00000001246(ATP1A1),ENSBTAG00000001333(PPARG),ENSBTAG00000001398(ATP2A2),ENSBTAG00000001575(CALM2),ENSBTAG00000001609(MAP2K6),ENSBTAG00000001662(EHD3),ENSBTAG00000001687(STC1),ENSBTAG0…
MF	GO:0097159	organic cyclic compound binding	1.7e-07	4.90604e-06	ENSBTAG00000000005(GRK3),ENSBTAG00000000009(FOXF1),ENSBTAG00000000013(PRKAA1),ENSBTAG00000000025(RAB6A),ENSBTAG00000000030(RDM1),ENSBTAG00000000039(SIRT7),ENSBTAG00000000040(MAFG),ENSBTAG00000000054(SNAPC4),ENSBTAG00000000056(STRADA),ENSBTAG00000000062(RASL12),ENSBTAG00000000064(FEN1),ENSBTAG00000000071(PMP2),ENSBTAG00000000072(TFB2M),ENSBTAG00000000074(NFIA),ENSBTAG00000000080(GRWD1),ENSBTAG0000…
MF	GO:0005539	glycosaminoglycan binding	1.7e-07	4.90604e-06	ENSBTAG00000000057(THBS3),ENSBTAG00000000073(LRPAP1),ENSBTAG00000000087(HSD17B12),ENSBTAG00000000253(PTPRF),ENSBTAG00000000484(HYAL2),ENSBTAG00000000604(GPNMB),ENSBTAG00000000706(ADAMTS1),ENSBTAG00000000707(CCN4),ENSBTAG00000000802(LYVE1),ENSBTAG00000001105(ANXA4),ENSBTAG00000001151(APLP1),ENSBTAG00000001292(LTF),ENSBTAG00000001535(LIPH),ENSBTAG00000001725(CXCL10),ENSBTAG00000001740(HAPLN3),ENSBT…
BP	GO:0050730	regulation of peptidyl-tyrosine phosphorylation	1.7e-07	4.90604e-06	ENSBTAG00000000113(ARHGEF2),ENSBTAG00000000484(HYAL2),ENSBTAG00000000569(HES1),ENSBTAG00000000962(STAP1),ENSBTAG00000001009(HCLS1),ENSBTAG00000001069(TP53),ENSBTAG00000001241(ISL1),ENSBTAG00000001523(YES1),ENSBTAG00000001567(LRRK1),ENSBTAG00000001570(CSF2),ENSBTAG00000001941(SEMA4D),ENSBTAG00000002140(IL3),ENSBTAG00000002483(HES5),ENSBTAG00000002623(SAMSN1),ENSBTAG00000002645(SH3BP5L),ENSBTAG0000…
BP	GO:2001234	negative regulation of apoptotic signaling pathway	1.7e-07	4.90604e-06	ENSBTAG00000000312(GRINA),ENSBTAG00000000317(MAPK8IP1),ENSBTAG00000000399(NANOS3),ENSBTAG00000000436(TNFAIP3),ENSBTAG00000000640(SELENOS),ENSBTAG00000000735(BCL2A1),ENSBTAG00000000878(RB1CC1),ENSBTAG00000001014(MAPK7),ENSBTAG00000001223(CAAP1),ENSBTAG00000001306(FXN),ENSBTAG00000001321(IL1B),ENSBTAG00000001500(FIGNL1),ENSBTAG00000001508(SH3RF1),ENSBTAG00000001570(CSF2),ENSBTAG00000001817(TMEM161A…
BP	GO:0019439	aromatic compound catabolic process	1.7e-07	4.90604e-06	ENSBTAG00000000064(FEN1),ENSBTAG00000000140(EPHX1),ENSBTAG00000000267(SMG6),ENSBTAG00000000288(UPF2),ENSBTAG00000000371(DIS3L),ENSBTAG00000000399(NANOS3),ENSBTAG00000000494(PDE4D),ENSBTAG00000000502(DAZL),ENSBTAG00000000546(TOB1),ENSBTAG00000000613(ELAVL1),ENSBTAG00000000678(CSDE1),ENSBTAG00000001044(SUPV3L1),ENSBTAG00000001325(UPB1),ENSBTAG00000001468(SAMD4A),ENSBTAG00000001546(MGAT1),ENSBTAG000…
MF	GO:0005096	GTPase activator activity	1.8e-07	5.17926e-06	ENSBTAG00000000147(RIC8B),ENSBTAG00000000152(RANBP2),ENSBTAG00000000210(ARHGAP31),ENSBTAG00000000333(ARHGAP20),ENSBTAG00000000571(ARHGAP27),ENSBTAG00000000684(ARHGEF10L),ENSBTAG00000000713(AGFG2),ENSBTAG00000000942(SIPA1L2),ENSBTAG00000001057(ARFGAP3),ENSBTAG00000001295(DEPDC5),ENSBTAG00000001483(SRGAP2),ENSBTAG00000001918(STXBP5L),ENSBTAG00000002042(RIC8A),ENSBTAG00000002329(ASAP2),ENSBTAG000000…
MF	GO:0030695	GTPase regulator activity	1.8e-07	5.17926e-06	ENSBTAG00000000147(RIC8B),ENSBTAG00000000152(RANBP2),ENSBTAG00000000210(ARHGAP31),ENSBTAG00000000333(ARHGAP20),ENSBTAG00000000490(RTKN),ENSBTAG00000000571(ARHGAP27),ENSBTAG00000000684(ARHGEF10L),ENSBTAG00000000713(AGFG2),ENSBTAG00000000942(SIPA1L2),ENSBTAG00000001057(ARFGAP3),ENSBTAG00000001295(DEPDC5),ENSBTAG00000001483(SRGAP2),ENSBTAG00000001918(STXBP5L),ENSBTAG00000002042(RIC8A),ENSBTAG0000000…
BP	GO:0030522	intracellular receptor signaling pathway	1.9e-07	5.45087e-06	ENSBTAG00000000396(PIM1),ENSBTAG00000000415(ERBIN),ENSBTAG00000000436(TNFAIP3),ENSBTAG00000000507(NR4A1),ENSBTAG00000000602(RXRB),ENSBTAG00000000630(LSM14A),ENSBTAG00000001024(ARID1A),ENSBTAG00000001221(NKX3-1),ENSBTAG00000001333(PPARG),ENSBTAG00000001790(SAFB2),ENSBTAG00000001864(NR4A3),ENSBTAG00000002116(ZCCHC3),ENSBTAG00000002296(TMEM173),ENSBTAG00000002315(RNF34),ENSBTAG00000002487(UBE3A),ENS…
CC	GO:0005798	Golgi-associated vesicle	1.9e-07	5.45087e-06	ENSBTAG00000000090(SEC31B),ENSBTAG00000000807(TMED3),ENSBTAG00000000810(COPE),ENSBTAG00000000854(SEC16B),ENSBTAG00000001028(MAP6),ENSBTAG00000001057(ARFGAP3),ENSBTAG00000001137(CLTA),ENSBTAG00000001394(TMED9),ENSBTAG00000001948(VTI1B),ENSBTAG00000001977(YIPF6),ENSBTAG00000002105(TEX261),ENSBTAG00000002309(CSPG5),ENSBTAG00000002357(TICAM2),ENSBTAG00000002402(IGF2R),ENSBTAG00000002769(AP1G1),ENSBTA…
MF	GO:0060589	nucleoside-triphosphatase regulator activity	2e-07	5.70411e-06	ENSBTAG00000000147(RIC8B),ENSBTAG00000000152(RANBP2),ENSBTAG00000000210(ARHGAP31),ENSBTAG00000000333(ARHGAP20),ENSBTAG00000000490(RTKN),ENSBTAG00000000571(ARHGAP27),ENSBTAG00000000684(ARHGEF10L),ENSBTAG00000000713(AGFG2),ENSBTAG00000000771(DNAJB6),ENSBTAG00000000942(SIPA1L2),ENSBTAG00000001057(ARFGAP3),ENSBTAG00000001295(DEPDC5),ENSBTAG00000001483(SRGAP2),ENSBTAG00000001918(STXBP5L),ENSBTAG000000…
BP	GO:0014706	striated muscle tissue development	2e-07	5.70411e-06	ENSBTAG00000000013(PRKAA1),ENSBTAG00000000231(BMPR1A),ENSBTAG00000000329(MEGF10),ENSBTAG00000000396(PIM1),ENSBTAG00000000507(NR4A1),ENSBTAG00000000919(HEY2),ENSBTAG00000000992(BMP10),ENSBTAG00000001024(ARID1A),ENSBTAG00000001058(SRPK3),ENSBTAG00000001086(FHL2),ENSBTAG00000001241(ISL1),ENSBTAG00000001539(SAV1),ENSBTAG00000001700(CDC42),ENSBTAG00000001776(SIRT2),ENSBTAG00000001835(GJA1),ENSBTAG0000…
CC	GO:0044421	extracellular region part	2e-07	5.70411e-06	ENSBTAG00000000016(LTA),ENSBTAG00000000027(IGFL1),ENSBTAG00000000033(PHOSPHO1),ENSBTAG00000000078(GLIPR2),ENSBTAG00000000087(HSD17B12),ENSBTAG00000000095(CD274),ENSBTAG00000000124(DHH),ENSBTAG00000000130(TNFSF13),ENSBTAG00000000164(GNRH1),ENSBTAG00000000259(CHIA),ENSBTAG00000000283(CSF1),ENSBTAG00000000310(MFAP5),ENSBTAG00000000340(ADNP),ENSBTAG00000000342(PLOD3),ENSBTAG00000000395(ADAMTS20),ENSB…
CC	GO:0000775	chromosome, centromeric region	2e-07	5.70411e-06	ENSBTAG00000000022(NUP37),ENSBTAG00000000162(ANAPC16),ENSBTAG00000000297(ZNF330),ENSBTAG00000000469(PPP2CA),ENSBTAG00000000500(PINX1),ENSBTAG00000000744(DCTN6),ENSBTAG00000000746(KAT2B),ENSBTAG00000000752(SGO1),ENSBTAG00000001185(KMT5B),ENSBTAG00000001323(CENPC),ENSBTAG00000001717(AURKB),ENSBTAG00000002078(KDM4A),ENSBTAG00000002117(KIF18A),ENSBTAG00000002260(NCAPD3),ENSBTAG00000002474(MAD1L1),ENS…
BP	GO:0051098	regulation of binding	2.1e-07	5.94572e-06	ENSBTAG00000000073(LRPAP1),ENSBTAG00000000253(PTPRF),ENSBTAG00000000428(BAK1),ENSBTAG00000000500(PINX1),ENSBTAG00000000504(GTF2B),ENSBTAG00000000569(HES1),ENSBTAG00000000579(NIPBL),ENSBTAG00000000694(TAF10),ENSBTAG00000000730(GCG),ENSBTAG00000000731(WFIKKN2),ENSBTAG00000000842(UBASH3B),ENSBTAG00000000888(SPTA1),ENSBTAG00000000919(HEY2),ENSBTAG00000001050(LDLRAP1),ENSBTAG00000001221(NKX3-1),ENSBTA…
BP	GO:1905037	autophagosome organization	2.1e-07	5.94572e-06	ENSBTAG00000000510(ATG101),ENSBTAG00000000878(RB1CC1),ENSBTAG00000001030(MTMR3),ENSBTAG00000001192(STX12),ENSBTAG00000001607(TMEM41B),ENSBTAG00000002033(UBXN2A),ENSBTAG00000002563(WDR45),ENSBTAG00000003208(RAB33B),ENSBTAG00000003695(WDR45B),ENSBTAG00000003928(ATG16L1),ENSBTAG00000003942(PIP4K2C),ENSBTAG00000004282(AMBRA1),ENSBTAG00000005314(MFN2),ENSBTAG00000005362(RAB23),ENSBTAG00000005400(ATG5)…
BP	GO:2001141	regulation of RNA biosynthetic process	2.1e-07	5.94572e-06	ENSBTAG00000000009(FOXF1),ENSBTAG00000000013(PRKAA1),ENSBTAG00000000023(RNF2),ENSBTAG00000000031(TRPV4),ENSBTAG00000000039(SIRT7),ENSBTAG00000000040(MAFG),ENSBTAG00000000072(TFB2M),ENSBTAG00000000074(NFIA),ENSBTAG00000000092(HIF1AN),ENSBTAG00000000098(SETDB1),ENSBTAG00000000113(ARHGEF2),ENSBTAG00000000184(EIF2AK3),ENSBTAG00000000222(ARID4B),ENSBTAG00000000231(BMPR1A),ENSBTAG00000000252(POLE3),ENS…
BP	GO:0071363	cellular response to growth factor stimulus	2.1e-07	5.94572e-06	ENSBTAG00000000128(FGF18),ENSBTAG00000000163(DDIT4),ENSBTAG00000000231(BMPR1A),ENSBTAG00000000411(HGS),ENSBTAG00000000483(HYAL1),ENSBTAG00000000484(HYAL2),ENSBTAG00000000541(NKX2-1),ENSBTAG00000000546(TOB1),ENSBTAG00000000569(HES1),ENSBTAG00000000625(SMAD6),ENSBTAG00000000696(ILK),ENSBTAG00000000731(WFIKKN2),ENSBTAG00000000764(GIPC1),ENSBTAG00000000778(HSP90AB1),ENSBTAG00000000782(KDR),ENSBTAG000…
CC	GO:0030135	coated vesicle	2.1e-07	5.94572e-06	ENSBTAG00000000026(VPS33B),ENSBTAG00000000090(SEC31B),ENSBTAG00000000807(TMED3),ENSBTAG00000000810(COPE),ENSBTAG00000000854(SEC16B),ENSBTAG00000001057(ARFGAP3),ENSBTAG00000001137(CLTA),ENSBTAG00000001394(TMED9),ENSBTAG00000001657(PICALM),ENSBTAG00000001870(CPNE6),ENSBTAG00000001948(VTI1B),ENSBTAG00000001977(YIPF6),ENSBTAG00000002105(TEX261),ENSBTAG00000002136(FCHO1),ENSBTAG00000002352(GGA2),ENSBT…
BP	GO:0055114	oxidation-reduction process	2.2e-07	6.20177e-06	ENSBTAG00000000011(TDH),ENSBTAG00000000013(PRKAA1),ENSBTAG00000000014(TXN2),ENSBTAG00000000031(TRPV4),ENSBTAG00000000042(PYCR1),ENSBTAG00000000085(CYP1A2),ENSBTAG00000000087(HSD17B12),ENSBTAG00000000091(NDUFB8),ENSBTAG00000000092(HIF1AN),ENSBTAG00000000111(UGP2),ENSBTAG00000000123(HAO2),ENSBTAG00000000229,ENSBTAG00000000246(ME3),ENSBTAG00000000257(MRAP2),ENSBTAG00000000286(PFKM),ENSBTAG0000000029…
BP	GO:0002521	leukocyte differentiation	2.2e-07	6.20177e-06	ENSBTAG00000000283(CSF1),ENSBTAG00000000292(TCIRG1),ENSBTAG00000000306(ITK),ENSBTAG00000000428(BAK1),ENSBTAG00000000815(EPHA2),ENSBTAG00000000816(PRDM1),ENSBTAG00000000842(UBASH3B),ENSBTAG00000001002(TCF7),ENSBTAG00000001009(HCLS1),ENSBTAG00000001034(IL18R1),ENSBTAG00000001069(TP53),ENSBTAG00000001273(NLRP3),ENSBTAG00000001292(LTF),ENSBTAG00000001333(PPARG),ENSBTAG00000001508(SH3RF1),ENSBTAG00000…
CC	GO:0055037	recycling endosome	2.2e-07	6.20177e-06	ENSBTAG00000000026(VPS33B),ENSBTAG00000000095(CD274),ENSBTAG00000000616(GPR161),ENSBTAG00000000711(NDRG1),ENSBTAG00000000742(AMOTL2),ENSBTAG00000000985(RAB10),ENSBTAG00000001050(LDLRAP1),ENSBTAG00000001192(STX12),ENSBTAG00000001320(VPS16),ENSBTAG00000001352(ENTR1),ENSBTAG00000001489(TUBA1A),ENSBTAG00000001647(PLEKHJ1),ENSBTAG00000001662(EHD3),ENSBTAG00000001948(VTI1B),ENSBTAG00000002283(FZD7),ENS…
BP	GO:0072657	protein localization to membrane	2.3e-07	6.47428e-06	ENSBTAG00000000224(TSPAN15),ENSBTAG00000000257(MRAP2),ENSBTAG00000000279(RAB26),ENSBTAG00000000347(RHOG),ENSBTAG00000000411(HGS),ENSBTAG00000000460(SYTL2),ENSBTAG00000000511(CNST),ENSBTAG00000000754(PPP2R5A),ENSBTAG00000000815(EPHA2),ENSBTAG00000000985(RAB10),ENSBTAG00000001015(TM9SF4),ENSBTAG00000001050(LDLRAP1),ENSBTAG00000001332(MYO1C),ENSBTAG00000001400(AKT2),ENSBTAG00000001403(PRKCI),ENSBTAG…
BP	GO:0016485	protein processing	2.4e-07	6.74601e-06	ENSBTAG00000000124(DHH),ENSBTAG00000000428(BAK1),ENSBTAG00000000475(IMMP1L),ENSBTAG00000000597(TMPRSS15),ENSBTAG00000000874(CAST),ENSBTAG00000000894(PGK1),ENSBTAG00000000902(OGT),ENSBTAG00000001244(PLAT),ENSBTAG00000001306(FXN),ENSBTAG00000001321(IL1B),ENSBTAG00000001353(PMPCA),ENSBTAG00000001915(APOH),ENSBTAG00000002006(THBS1),ENSBTAG00000002075(MME),ENSBTAG00000002303(GLG1),ENSBTAG00000002305(P…
MF	GO:0001085	RNA polymerase II transcription factor binding	2.5e-07	7.01696e-06	ENSBTAG00000000919(HEY2),ENSBTAG00000001009(HCLS1),ENSBTAG00000001069(TP53),ENSBTAG00000001241(ISL1),ENSBTAG00000001333(PPARG),ENSBTAG00000001755(NEUROD1),ENSBTAG00000002295(ATF2),ENSBTAG00000002579(FBL),ENSBTAG00000003098(MTDH),ENSBTAG00000003184(GATA1),ENSBTAG00000004037(JUN),ENSBTAG00000004073(MTA3),ENSBTAG00000004322(FOS),ENSBTAG00000004602(PITX1),ENSBTAG00000005029(TAL1),ENSBTAG00000005425(G…
BP	GO:0009267	cellular response to starvation	2.7e-07	7.56739e-06	ENSBTAG00000000013(PRKAA1),ENSBTAG00000000184(EIF2AK3),ENSBTAG00000000321(TBL2),ENSBTAG00000000697(RRP8),ENSBTAG00000001030(MTMR3),ENSBTAG00000001069(TP53),ENSBTAG00000001295(DEPDC5),ENSBTAG00000001936(PCK1),ENSBTAG00000002216(MYOD1),ENSBTAG00000002363(SESN2),ENSBTAG00000002563(WDR45),ENSBTAG00000002799(SLC39A5),ENSBTAG00000002833(FBXO22),ENSBTAG00000002883(RPTOR),ENSBTAG00000003015(SESN1),ENSBTA…
BP	GO:0019318	hexose metabolic process	2.8e-07	7.83637e-06	ENSBTAG00000000013(PRKAA1),ENSBTAG00000000152(RANBP2),ENSBTAG00000000286(PFKM),ENSBTAG00000000442(RBP4),ENSBTAG00000000545(PPP4R3B),ENSBTAG00000000730(GCG),ENSBTAG00000000746(KAT2B),ENSBTAG00000000785(PASK),ENSBTAG00000000894(PGK1),ENSBTAG00000000902(OGT),ENSBTAG00000001069(TP53),ENSBTAG00000001400(AKT2),ENSBTAG00000001440(PMM2),ENSBTAG00000001578(ADPGK),ENSBTAG00000001752(FUCA2),ENSBTAG000000019…
BP	GO:0051051	negative regulation of transport	2.9e-07	8.09296e-06	ENSBTAG00000000009(FOXF1),ENSBTAG00000000073(LRPAP1),ENSBTAG00000000436(TNFAIP3),ENSBTAG00000000437(FFAR4),ENSBTAG00000000871(TRIM27),ENSBTAG00000000970(ASIC1),ENSBTAG00000001105(ANXA4),ENSBTAG00000001150(KCNE1),ENSBTAG00000001273(NLRP3),ENSBTAG00000001321(IL1B),ENSBTAG00000001400(AKT2),ENSBTAG00000001575(CALM2),ENSBTAG00000001592(INSIG1),ENSBTAG00000001657(PICALM),ENSBTAG00000001687(STC1),ENSBTA…
BP	GO:1903506	regulation of nucleic acid-templated transcription	2.9e-07	8.09296e-06	ENSBTAG00000000009(FOXF1),ENSBTAG00000000013(PRKAA1),ENSBTAG00000000023(RNF2),ENSBTAG00000000031(TRPV4),ENSBTAG00000000039(SIRT7),ENSBTAG00000000040(MAFG),ENSBTAG00000000072(TFB2M),ENSBTAG00000000074(NFIA),ENSBTAG00000000092(HIF1AN),ENSBTAG00000000098(SETDB1),ENSBTAG00000000113(ARHGEF2),ENSBTAG00000000184(EIF2AK3),ENSBTAG00000000222(ARID4B),ENSBTAG00000000231(BMPR1A),ENSBTAG00000000252(POLE3),ENS…
MF	GO:0000287	magnesium ion binding	3e-07	8.34807e-06	ENSBTAG00000000064(FEN1),ENSBTAG00000000199(PDP1),ENSBTAG00000000207(PUDP),ENSBTAG00000000223(PPM1B),ENSBTAG00000000365(TDP2),ENSBTAG00000000473(ATP10D),ENSBTAG00000000679(PGM3),ENSBTAG00000001083(MAP3K20),ENSBTAG00000001224(ATP9B),ENSBTAG00000001424(MSH6),ENSBTAG00000001601(PKM),ENSBTAG00000001936(PCK1),ENSBTAG00000002015(RPS6KA6),ENSBTAG00000002175(SRPK2),ENSBTAG00000002347(MAST3),ENSBTAG000000…
BP	GO:0060485	mesenchyme development	3e-07	8.34807e-06	ENSBTAG00000000009(FOXF1),ENSBTAG00000000078(GLIPR2),ENSBTAG00000000231(BMPR1A),ENSBTAG00000000413(NRTN),ENSBTAG00000000469(PPP2CA),ENSBTAG00000000541(NKX2-1),ENSBTAG00000000569(HES1),ENSBTAG00000000570(RET),ENSBTAG00000000660(FAM83D),ENSBTAG00000000919(HEY2),ENSBTAG00000001209(PHLDB2),ENSBTAG00000001241(ISL1),ENSBTAG00000001321(IL1B),ENSBTAG00000001941(SEMA4D),ENSBTAG00000002335(HAND1),ENSBTAG00…
BP	GO:2001020	regulation of response to DNA damage stimulus	3.1e-07	8.60173e-06	ENSBTAG00000000753(PIAS4),ENSBTAG00000000837(PARP1),ENSBTAG00000000892(CGAS),ENSBTAG00000001069(TP53),ENSBTAG00000001071(WRAP53),ENSBTAG00000001221(NKX3-1),ENSBTAG00000001500(FIGNL1),ENSBTAG00000001707(UIMC1),ENSBTAG00000001771(DYRK1A),ENSBTAG00000001773(CYREN),ENSBTAG00000001817(TMEM161A),ENSBTAG00000002147(PPP4R2),ENSBTAG00000002472(CASP9),ENSBTAG00000002534(EEF1E1),ENSBTAG00000002918(RAD51),EN…
BP	GO:0007517	muscle organ development	3.1e-07	8.60173e-06	ENSBTAG00000000013(PRKAA1),ENSBTAG00000000231(BMPR1A),ENSBTAG00000000329(MEGF10),ENSBTAG00000000396(PIM1),ENSBTAG00000000507(NR4A1),ENSBTAG00000000919(HEY2),ENSBTAG00000000992(BMP10),ENSBTAG00000001058(SRPK3),ENSBTAG00000001241(ISL1),ENSBTAG00000001503(TRIM72),ENSBTAG00000001539(SAV1),ENSBTAG00000001776(SIRT2),ENSBTAG00000001835(GJA1),ENSBTAG00000002092(PI16),ENSBTAG00000002107(FZD1),ENSBTAG00000…
MF	GO:0000987	core promoter proximal region sequence-specific DNA binding	3.4e-07	9.39395e-06	ENSBTAG00000000040(MAFG),ENSBTAG00000000074(NFIA),ENSBTAG00000000264(RFX6),ENSBTAG00000000507(NR4A1),ENSBTAG00000000536(ZNF395),ENSBTAG00000000541(NKX2-1),ENSBTAG00000000558(NEUROD6),ENSBTAG00000000565(RFX7),ENSBTAG00000000625(SMAD6),ENSBTAG00000000656(NFATC1),ENSBTAG00000000816(PRDM1),ENSBTAG00000000819(RFX3),ENSBTAG00000001002(TCF7),ENSBTAG00000001042(MXD1),ENSBTAG00000001069(TP53),ENSBTAG00000…
MF	GO:0001159	core promoter proximal region DNA binding	3.4e-07	9.39395e-06	ENSBTAG00000000040(MAFG),ENSBTAG00000000074(NFIA),ENSBTAG00000000264(RFX6),ENSBTAG00000000507(NR4A1),ENSBTAG00000000536(ZNF395),ENSBTAG00000000541(NKX2-1),ENSBTAG00000000558(NEUROD6),ENSBTAG00000000565(RFX7),ENSBTAG00000000625(SMAD6),ENSBTAG00000000656(NFATC1),ENSBTAG00000000816(PRDM1),ENSBTAG00000000819(RFX3),ENSBTAG00000001002(TCF7),ENSBTAG00000001042(MXD1),ENSBTAG00000001069(TP53),ENSBTAG00000…
BP	GO:0090407	organophosphate biosynthetic process	3.4e-07	9.39395e-06	ENSBTAG00000000019(SERINC1),ENSBTAG00000000065(CRLS1),ENSBTAG00000000077(ADSL),ENSBTAG00000000212(NADK),ENSBTAG00000000296(IMPDH1),ENSBTAG00000000301,ENSBTAG00000000550(ATP5F1D),ENSBTAG00000000605(ATP5PF),ENSBTAG00000000639(APRT),ENSBTAG00000000675(PGS1),ENSBTAG00000000795(NMNAT2),ENSBTAG00000000837(PARP1),ENSBTAG00000000944(LPCAT1),ENSBTAG00000001485(PPIP5K2),ENSBTAG00000001675(ITPKA),ENSBTAG000…
CC	GO:0030496	midbody	3.5e-07	9.65652e-06	ENSBTAG00000000501(KLHL13),ENSBTAG00000000981(KLHDC8B),ENSBTAG00000001323(CENPC),ENSBTAG00000001352(ENTR1),ENSBTAG00000001700(CDC42),ENSBTAG00000001717(AURKB),ENSBTAG00000001776(SIRT2),ENSBTAG00000002393(C23H6orf89),ENSBTAG00000002411(CTNND1),ENSBTAG00000002608(SEPT2),ENSBTAG00000002682(MARK4),ENSBTAG00000002714(GNAI1),ENSBTAG00000002834(CCDC69),ENSBTAG00000003298(LZTS2),ENSBTAG00000003362(HSP90B…
BP	GO:0046700	heterocycle catabolic process	3.6e-07	9.91836e-06	ENSBTAG00000000064(FEN1),ENSBTAG00000000267(SMG6),ENSBTAG00000000288(UPF2),ENSBTAG00000000371(DIS3L),ENSBTAG00000000399(NANOS3),ENSBTAG00000000494(PDE4D),ENSBTAG00000000502(DAZL),ENSBTAG00000000546(TOB1),ENSBTAG00000000613(ELAVL1),ENSBTAG00000000678(CSDE1),ENSBTAG00000001044(SUPV3L1),ENSBTAG00000001325(UPB1),ENSBTAG00000001468(SAMD4A),ENSBTAG00000001546(MGAT1),ENSBTAG00000001612(LSM1),ENSBTAG0000…
BP	GO:0008361	regulation of cell size	3.7e-07	1.01507e-05	ENSBTAG00000000496(SLC12A8),ENSBTAG00000000570(RET),ENSBTAG00000000745(AQP1),ENSBTAG00000000878(RB1CC1),ENSBTAG00000000900(LRRC8C),ENSBTAG00000001131(SLC12A9),ENSBTAG00000001941(SEMA4D),ENSBTAG00000001961(MAP1B),ENSBTAG00000002518(NKX6-1),ENSBTAG00000002661(ISLR2),ENSBTAG00000002883(RPTOR),ENSBTAG00000003014(TRPV2),ENSBTAG00000003418(MSN),ENSBTAG00000003791(LPAR3),ENSBTAG00000004279(RHOA),ENSBTAG…
BP	GO:0060249	anatomical structure homeostasis	3.7e-07	1.01507e-05	ENSBTAG00000000013(PRKAA1),ENSBTAG00000000267(SMG6),ENSBTAG00000000283(CSF1),ENSBTAG00000000286(PFKM),ENSBTAG00000000292(TCIRG1),ENSBTAG00000000442(RBP4),ENSBTAG00000000500(PINX1),ENSBTAG00000000668(SLC22A5),ENSBTAG00000000687(POC1B),ENSBTAG00000000778(HSP90AB1),ENSBTAG00000000842(UBASH3B),ENSBTAG00000000944(LPCAT1),ENSBTAG00000000986(USH1C),ENSBTAG00000001071(WRAP53),ENSBTAG00000001075(CALB2),EN…
BP	GO:0042110	T cell activation	3.7e-07	1.01507e-05	ENSBTAG00000000095(CD274),ENSBTAG00000000292(TCIRG1),ENSBTAG00000000306(ITK),ENSBTAG00000000317(MAPK8IP1),ENSBTAG00000000569(HES1),ENSBTAG00000000604(GPNMB),ENSBTAG00000000816(PRDM1),ENSBTAG00000000888(SPTA1),ENSBTAG00000000892(CGAS),ENSBTAG00000001002(TCF7),ENSBTAG00000001034(IL18R1),ENSBTAG00000001069(TP53),ENSBTAG00000001273(NLRP3),ENSBTAG00000001321(IL1B),ENSBTAG00000001508(SH3RF1),ENSBTAG000…
BP	GO:0051253	negative regulation of RNA metabolic process	3.8e-07	1.04104e-05	ENSBTAG00000000009(FOXF1),ENSBTAG00000000023(RNF2),ENSBTAG00000000031(TRPV4),ENSBTAG00000000039(SIRT7),ENSBTAG00000000074(NFIA),ENSBTAG00000000092(HIF1AN),ENSBTAG00000000098(SETDB1),ENSBTAG00000000252(POLE3),ENSBTAG00000000266(NAB1),ENSBTAG00000000332(ERF),ENSBTAG00000000455(CREBZF),ENSBTAG00000000502(DAZL),ENSBTAG00000000541(NKX2-1),ENSBTAG00000000546(TOB1),ENSBTAG00000000569(HES1),ENSBTAG000000…
BP	GO:0016311	dephosphorylation	3.9e-07	1.06693e-05	ENSBTAG00000000033(PHOSPHO1),ENSBTAG00000000199(PDP1),ENSBTAG00000000223(PPM1B),ENSBTAG00000000253(PTPRF),ENSBTAG00000000460(SYTL2),ENSBTAG00000000469(PPP2CA),ENSBTAG00000000511(CNST),ENSBTAG00000000545(PPP4R3B),ENSBTAG00000000653(PPP1R16B),ENSBTAG00000000686(NANP),ENSBTAG00000000717(PLPP2),ENSBTAG00000000754(PPP2R5A),ENSBTAG00000000778(HSP90AB1),ENSBTAG00000000817(SYNJ2),ENSBTAG00000000842(UBASH…
MF	GO:0042578	phosphoric ester hydrolase activity	4.1e-07	1.12007e-05	ENSBTAG00000000033(PHOSPHO1),ENSBTAG00000000199(PDP1),ENSBTAG00000000223(PPM1B),ENSBTAG00000000253(PTPRF),ENSBTAG00000000354(PDE6G),ENSBTAG00000000365(TDP2),ENSBTAG00000000445(PDE6C),ENSBTAG00000000469(PPP2CA),ENSBTAG00000000494(PDE4D),ENSBTAG00000000686(NANP),ENSBTAG00000000717(PLPP2),ENSBTAG00000000754(PPP2R5A),ENSBTAG00000000817(SYNJ2),ENSBTAG00000000842(UBASH3B),ENSBTAG00000001030(MTMR3),ENSB…
MF	GO:0032182	ubiquitin-like protein binding	4.5e-07	1.22419e-05	ENSBTAG00000000320(UBAP1),ENSBTAG00000000436(TNFAIP3),ENSBTAG00000001060(CXCR4),ENSBTAG00000001178(USPL1),ENSBTAG00000001600(DCUN1D4),ENSBTAG00000001632(NBR1),ENSBTAG00000001776(SIRT2),ENSBTAG00000001926(RAD23B),ENSBTAG00000001938(CKS2),ENSBTAG00000002033(UBXN2A),ENSBTAG00000002573(UBA2),ENSBTAG00000002887(DDI1),ENSBTAG00000003087(DCUN1D5),ENSBTAG00000003745(WDR48),ENSBTAG00000003914(MVB12A),ENSB…
BP	GO:0048589	developmental growth	4.5e-07	1.22419e-05	ENSBTAG00000000057(THBS3),ENSBTAG00000000231(BMPR1A),ENSBTAG00000000283(CSF1),ENSBTAG00000000396(PIM1),ENSBTAG00000000435(TARBP2),ENSBTAG00000000494(PDE4D),ENSBTAG00000000579(NIPBL),ENSBTAG00000000694(TAF10),ENSBTAG00000000778(HSP90AB1),ENSBTAG00000000919(HEY2),ENSBTAG00000000992(BMP10),ENSBTAG00000001069(TP53),ENSBTAG00000001271(PLG),ENSBTAG00000001306(FXN),ENSBTAG00000001539(SAV1),ENSBTAG000000…
CC	GO:0030027	lamellipodium	4.5e-07	1.22419e-05	ENSBTAG00000000032(ABI3),ENSBTAG00000000210(ARHGAP31),ENSBTAG00000000696(ILK),ENSBTAG00000000700(PARVA),ENSBTAG00000000815(EPHA2),ENSBTAG00000000897(IQGAP2),ENSBTAG00000001508(SH3RF1),ENSBTAG00000001700(CDC42),ENSBTAG00000002084(UNC5C),ENSBTAG00000002727(PHACTR4),ENSBTAG00000003051(FER),ENSBTAG00000003191(FSCN1),ENSBTAG00000003401(ACTR3),ENSBTAG00000003712(FAM89B),ENSBTAG00000004279(RHOA),ENSBTAG…
BP	GO:0018209	peptidyl-serine modification	4.6e-07	1.24965e-05	ENSBTAG00000000013(PRKAA1),ENSBTAG00000000163(DDIT4),ENSBTAG00000000428(BAK1),ENSBTAG00000000494(PDE4D),ENSBTAG00000000570(RET),ENSBTAG00000000626(STK32A),ENSBTAG00000000696(ILK),ENSBTAG00000000730(GCG),ENSBTAG00000000778(HSP90AB1),ENSBTAG00000000837(PARP1),ENSBTAG00000001009(HCLS1),ENSBTAG00000001014(MAPK7),ENSBTAG00000001061(PRKCA),ENSBTAG00000001400(AKT2),ENSBTAG00000001403(PRKCI),ENSBTAG00000…
BP	GO:0010948	negative regulation of cell cycle process	4.7e-07	1.27503e-05	ENSBTAG00000000500(PINX1),ENSBTAG00000000604(GPNMB),ENSBTAG00000000746(KAT2B),ENSBTAG00000000778(HSP90AB1),ENSBTAG00000001069(TP53),ENSBTAG00000001225(RBM14),ENSBTAG00000001424(MSH6),ENSBTAG00000001463(TNKS),ENSBTAG00000001567(LRRK1),ENSBTAG00000001651(SYF2),ENSBTAG00000001707(UIMC1),ENSBTAG00000001717(AURKB),ENSBTAG00000002073(RAD17),ENSBTAG00000002121(CDK2AP2),ENSBTAG00000002226(FBXO31),ENSBTAG…
BP	GO:0002573	myeloid leukocyte differentiation	4.9e-07	1.32744e-05	ENSBTAG00000000283(CSF1),ENSBTAG00000000292(TCIRG1),ENSBTAG00000000815(EPHA2),ENSBTAG00000000842(UBASH3B),ENSBTAG00000001009(HCLS1),ENSBTAG00000001292(LTF),ENSBTAG00000001333(PPARG),ENSBTAG00000001567(LRRK1),ENSBTAG00000001570(CSF2),ENSBTAG00000002150(IL17A),ENSBTAG00000002278(FBN1),ENSBTAG00000002504(IREB2),ENSBTAG00000002699(KIT),ENSBTAG00000002922(GAB2),ENSBTAG00000002929(IRF4),ENSBTAG00000002…
BP	GO:0045667	regulation of osteoblast differentiation	5e-07	1.35264e-05	ENSBTAG00000000231(BMPR1A),ENSBTAG00000000292(TCIRG1),ENSBTAG00000000546(TOB1),ENSBTAG00000000625(SMAD6),ENSBTAG00000000696(ILK),ENSBTAG00000001019(GDF10),ENSBTAG00000001292(LTF),ENSBTAG00000001632(NBR1),ENSBTAG00000001805(TWSG1),ENSBTAG00000001835(GJA1),ENSBTAG00000001941(SEMA4D),ENSBTAG00000002081(BMPR1B),ENSBTAG00000002095(MEN1),ENSBTAG00000002835(SMAD1),ENSBTAG00000002878(CHRD),ENSBTAG0000000…
BP	GO:0031098	stress-activated protein kinase signaling cascade	5.4e-07	1.45883e-05	ENSBTAG00000000031(TRPV4),ENSBTAG00000000056(STRADA),ENSBTAG00000000218(MAP2K5),ENSBTAG00000000317(MAPK8IP1),ENSBTAG00000000548(KLHDC10),ENSBTAG00000000563(MYD88),ENSBTAG00000000838(CCDC88C),ENSBTAG00000000878(RB1CC1),ENSBTAG00000001017(SLK),ENSBTAG00000001037(MAP4K2),ENSBTAG00000001083(MAP3K20),ENSBTAG00000001321(IL1B),ENSBTAG00000001462(FLT4),ENSBTAG00000001508(SH3RF1),ENSBTAG00000001609(MAP2K6…
BP	GO:0045927	positive regulation of growth	5.6e-07	1.5045e-05	ENSBTAG00000000231(BMPR1A),ENSBTAG00000000283(CSF1),ENSBTAG00000000396(PIM1),ENSBTAG00000000483(HYAL1),ENSBTAG00000000579(NIPBL),ENSBTAG00000000895(TAF9B),ENSBTAG00000000919(HEY2),ENSBTAG00000000957(CDKN2AIP),ENSBTAG00000000992(BMP10),ENSBTAG00000001044(SUPV3L1),ENSBTAG00000001306(FXN),ENSBTAG00000001570(CSF2),ENSBTAG00000001801(SYT4),ENSBTAG00000001870(CPNE6),ENSBTAG00000001941(SEMA4D),ENSBTAG00…
BP	GO:1903532	positive regulation of secretion by cell	5.6e-07	1.5045e-05	ENSBTAG00000000031(TRPV4),ENSBTAG00000000095(CD274),ENSBTAG00000000259(CHIA),ENSBTAG00000000264(RFX6),ENSBTAG00000000286(PFKM),ENSBTAG00000000322(CD2AP),ENSBTAG00000000411(HGS),ENSBTAG00000000442(RBP4),ENSBTAG00000000484(HYAL2),ENSBTAG00000000730(GCG),ENSBTAG00000001221(NKX3-1),ENSBTAG00000001273(NLRP3),ENSBTAG00000001321(IL1B),ENSBTAG00000001801(SYT4),ENSBTAG00000002048(PTPN11),ENSBTAG0000000214…
CC	GO:0030658	transport vesicle membrane	5.6e-07	1.5045e-05	ENSBTAG00000000090(SEC31B),ENSBTAG00000000279(RAB26),ENSBTAG00000000799(ICA1),ENSBTAG00000000854(SEC16B),ENSBTAG00000001137(CLTA),ENSBTAG00000001192(STX12),ENSBTAG00000001599(SV2A),ENSBTAG00000001948(VTI1B),ENSBTAG00000002475(RAB11B),ENSBTAG00000002522(SYT5),ENSBTAG00000002769(AP1G1),ENSBTAG00000002791(SEC24C),ENSBTAG00000003619(SEC24D),ENSBTAG00000003708(SEC23A),ENSBTAG00000004188(SNAP47),ENSBTA…
CC	GO:0036477	somatodendritic compartment	5.6e-07	1.5045e-05	ENSBTAG00000000013(PRKAA1),ENSBTAG00000000088(ALCAM),ENSBTAG00000000109(NPTXR),ENSBTAG00000000113(ARHGEF2),ENSBTAG00000000153(LRFN3),ENSBTAG00000000241(STAU1),ENSBTAG00000000253(PTPRF),ENSBTAG00000000317(MAPK8IP1),ENSBTAG00000000534(PNOC),ENSBTAG00000000564(NSG2),ENSBTAG00000000634(MLPH),ENSBTAG00000000644(S100A5),ENSBTAG00000000764(GIPC1),ENSBTAG00000000778(HSP90AB1),ENSBTAG00000001028(MAP6),ENS…
MF	GO:0017137	Rab GTPase binding	5.7e-07	1.52295e-05	ENSBTAG00000000460(SYTL2),ENSBTAG00000000634(MLPH),ENSBTAG00000000711(NDRG1),ENSBTAG00000000737(DMXL2),ENSBTAG00000001533(HACE1),ENSBTAG00000001657(PICALM),ENSBTAG00000001918(STXBP5L),ENSBTAG00000002643(VPS52),ENSBTAG00000002645(SH3BP5L),ENSBTAG00000002769(AP1G1),ENSBTAG00000003049(MICALL2),ENSBTAG00000003097(DENND4C),ENSBTAG00000003192(TBC1D16),ENSBTAG00000003232(RAB29),ENSBTAG00000003382(RIMS4)…
MF	GO:0043177	organic acid binding	5.7e-07	1.52295e-05	ENSBTAG00000000071(PMP2),ENSBTAG00000000092(HIF1AN),ENSBTAG00000000342(PLOD3),ENSBTAG00000000437(FFAR4),ENSBTAG00000000484(HYAL2),ENSBTAG00000000802(LYVE1),ENSBTAG00000001116(P4HA2),ENSBTAG00000001171(OGFOD1),ENSBTAG00000001333(PPARG),ENSBTAG00000001488(OTC),ENSBTAG00000001740(HAPLN3),ENSBTAG00000001764(NCAN),ENSBTAG00000001936(PCK1),ENSBTAG00000002052(PLOD1),ENSBTAG00000002214(TAT),ENSBTAG000000…
BP	GO:0034655	nucleobase-containing compound catabolic process	5.7e-07	1.52295e-05	ENSBTAG00000000064(FEN1),ENSBTAG00000000267(SMG6),ENSBTAG00000000288(UPF2),ENSBTAG00000000371(DIS3L),ENSBTAG00000000399(NANOS3),ENSBTAG00000000494(PDE4D),ENSBTAG00000000502(DAZL),ENSBTAG00000000546(TOB1),ENSBTAG00000000613(ELAVL1),ENSBTAG00000000678(CSDE1),ENSBTAG00000001044(SUPV3L1),ENSBTAG00000001325(UPB1),ENSBTAG00000001468(SAMD4A),ENSBTAG00000001546(MGAT1),ENSBTAG00000001612(LSM1),ENSBTAG0000…
BP	GO:0071383	cellular response to steroid hormone stimulus	5.7e-07	1.52295e-05	ENSBTAG00000000163(DDIT4),ENSBTAG00000000507(NR4A1),ENSBTAG00000000602(RXRB),ENSBTAG00000000745(AQP1),ENSBTAG00000001024(ARID1A),ENSBTAG00000001221(NKX3-1),ENSBTAG00000001246(ATP1A1),ENSBTAG00000001333(PPARG),ENSBTAG00000001790(SAFB2),ENSBTAG00000001864(NR4A3),ENSBTAG00000001936(PCK1),ENSBTAG00000002216(MYOD1),ENSBTAG00000002472(CASP9),ENSBTAG00000002487(UBE3A),ENSBTAG00000002599(MGARP),ENSBTAG00…
BP	GO:1903829	positive regulation of cellular protein localization	5.9e-07	1.56992e-05	ENSBTAG00000000013(PRKAA1),ENSBTAG00000000231(BMPR1A),ENSBTAG00000000322(CD2AP),ENSBTAG00000000347(RHOG),ENSBTAG00000000484(HYAL2),ENSBTAG00000000500(PINX1),ENSBTAG00000000511(CNST),ENSBTAG00000000579(NIPBL),ENSBTAG00000000778(HSP90AB1),ENSBTAG00000000815(EPHA2),ENSBTAG00000000854(SEC16B),ENSBTAG00000001009(HCLS1),ENSBTAG00000001015(TM9SF4),ENSBTAG00000001071(WRAP53),ENSBTAG00000001332(MYO1C),ENS…
BP	GO:0071214	cellular response to abiotic stimulus	5.9e-07	1.56992e-05	ENSBTAG00000000031(TRPV4),ENSBTAG00000000252(POLE3),ENSBTAG00000000428(BAK1),ENSBTAG00000000483(HYAL1),ENSBTAG00000000484(HYAL2),ENSBTAG00000000579(NIPBL),ENSBTAG00000000745(AQP1),ENSBTAG00000000837(PARP1),ENSBTAG00000000970(ASIC1),ENSBTAG00000001069(TP53),ENSBTAG00000001083(MAP3K20),ENSBTAG00000001310(RHO),ENSBTAG00000001321(IL1B),ENSBTAG00000001400(AKT2),ENSBTAG00000001500(FIGNL1),ENSBTAG000000…
BP	GO:0104004	cellular response to environmental stimulus	5.9e-07	1.56992e-05	ENSBTAG00000000031(TRPV4),ENSBTAG00000000252(POLE3),ENSBTAG00000000428(BAK1),ENSBTAG00000000483(HYAL1),ENSBTAG00000000484(HYAL2),ENSBTAG00000000579(NIPBL),ENSBTAG00000000745(AQP1),ENSBTAG00000000837(PARP1),ENSBTAG00000000970(ASIC1),ENSBTAG00000001069(TP53),ENSBTAG00000001083(MAP3K20),ENSBTAG00000001310(RHO),ENSBTAG00000001321(IL1B),ENSBTAG00000001400(AKT2),ENSBTAG00000001500(FIGNL1),ENSBTAG000000…
CC	GO:0098857	membrane microdomain	6e-07	1.59434e-05	ENSBTAG00000000231(BMPR1A),ENSBTAG00000000469(PPP2CA),ENSBTAG00000000484(HYAL2),ENSBTAG00000000570(RET),ENSBTAG00000000736(LRP8),ENSBTAG00000000745(AQP1),ENSBTAG00000000782(KDR),ENSBTAG00000000894(PGK1),ENSBTAG00000001027(SERPINH1),ENSBTAG00000001192(STX12),ENSBTAG00000001332(MYO1C),ENSBTAG00000001882(CD79A),ENSBTAG00000002010(PI4K2A),ENSBTAG00000002075(MME),ENSBTAG00000002117(KIF18A),ENSBTAG0000…
BP	GO:0097530	granulocyte migration	6.2e-07	1.64524e-05	ENSBTAG00000000031(TRPV4),ENSBTAG00000000283(CSF1),ENSBTAG00000000494(PDE4D),ENSBTAG00000000563(MYD88),ENSBTAG00000001191(CCL17),ENSBTAG00000001321(IL1B),ENSBTAG00000001725(CXCL10),ENSBTAG00000002085(IL36G),ENSBTAG00000002150(IL17A),ENSBTAG00000002326(LGALS3),ENSBTAG00000003176(JAM3),ENSBTAG00000003289,ENSBTAG00000004129(CCL11),ENSBTAG00000004215(RARRES2),ENSBTAG00000004378(IL23A),ENSBTAG00000004…
BP	GO:0071347	cellular response to interleukin-1	6.3e-07	1.6695e-05	ENSBTAG00000000483(HYAL1),ENSBTAG00000000484(HYAL2),ENSBTAG00000001191(CCL17),ENSBTAG00000001221(NKX3-1),ENSBTAG00000002150(IL17A),ENSBTAG00000003289,ENSBTAG00000004129(CCL11),ENSBTAG00000005273(IL1R1),ENSBTAG00000005560(ST18),ENSBTAG00000005581(CCL25),ENSBTAG00000006193(IRAK2),ENSBTAG00000006343(IL1R2),ENSBTAG00000006654(TANK),ENSBTAG00000007599(IKBKB),ENSBTAG00000007636(IRAK3),ENSBTAG0000000823…
BP	GO:0006888	ER to Golgi vesicle-mediated transport	6.4e-07	1.69139e-05	ENSBTAG00000000090(SEC31B),ENSBTAG00000000274(YKT6),ENSBTAG00000000807(TMED3),ENSBTAG00000000810(COPE),ENSBTAG00000000854(SEC16B),ENSBTAG00000001057(ARFGAP3),ENSBTAG00000001394(TMED9),ENSBTAG00000001592(INSIG1),ENSBTAG00000001948(VTI1B),ENSBTAG00000002105(TEX261),ENSBTAG00000002128(MPPE1),ENSBTAG00000002357(TICAM2),ENSBTAG00000002417(RAB30),ENSBTAG00000002791(SEC24C),ENSBTAG00000002982(PITPNM3),E…
BP	GO:2001235	positive regulation of apoptotic signaling pathway	6.4e-07	1.69139e-05	ENSBTAG00000000484(HYAL2),ENSBTAG00000000753(PIAS4),ENSBTAG00000001069(TP53),ENSBTAG00000001096(PRKRA),ENSBTAG00000001221(NKX3-1),ENSBTAG00000002006(THBS1),ENSBTAG00000002081(BMPR1B),ENSBTAG00000002187(SERINC3),ENSBTAG00000002534(EEF1E1),ENSBTAG00000003257(STK4),ENSBTAG00000004147(FBH1),ENSBTAG00000004154(SKIL),ENSBTAG00000004280(SRPX),ENSBTAG00000004709(MAPK9),ENSBTAG00000005560(ST18),ENSBTAG000…
BP	GO:0044419	interspecies interaction between organisms	6.5e-07	1.71549e-05	ENSBTAG00000000016(LTA),ENSBTAG00000000188(HS3ST5),ENSBTAG00000000241(STAU1),ENSBTAG00000000435(TARBP2),ENSBTAG00000000484(HYAL2),ENSBTAG00000000504(GTF2B),ENSBTAG00000000563(MYD88),ENSBTAG00000000668(SLC22A5),ENSBTAG00000000745(AQP1),ENSBTAG00000000778(HSP90AB1),ENSBTAG00000000871(TRIM27),ENSBTAG00000001008(PRF1),ENSBTAG00000001069(TP53),ENSBTAG00000001292(LTF),ENSBTAG00000001415(THOC6),ENSBTAG0…
BP	GO:0006396	RNA processing	7.3e-07	1.92401e-05	ENSBTAG00000000072(TFB2M),ENSBTAG00000000197(TRMT10A),ENSBTAG00000000409(CDC40),ENSBTAG00000000423(RBM4B),ENSBTAG00000000435(TARBP2),ENSBTAG00000000439(SFSWAP),ENSBTAG00000000551(SMNDC1),ENSBTAG00000000642(INTS1),ENSBTAG00000000670(RRP9),ENSBTAG00000000697(RRP8),ENSBTAG00000000721(GPATCH1),ENSBTAG00000000824(TSEN54),ENSBTAG00000000848(SNRNP200),ENSBTAG00000000955(RBM41),ENSBTAG00000001035(SF1),EN…
BP	GO:0006355	regulation of transcription, DNA-templated	7.5e-07	1.97139e-05	ENSBTAG00000000009(FOXF1),ENSBTAG00000000013(PRKAA1),ENSBTAG00000000023(RNF2),ENSBTAG00000000031(TRPV4),ENSBTAG00000000039(SIRT7),ENSBTAG00000000040(MAFG),ENSBTAG00000000072(TFB2M),ENSBTAG00000000074(NFIA),ENSBTAG00000000092(HIF1AN),ENSBTAG00000000098(SETDB1),ENSBTAG00000000113(ARHGEF2),ENSBTAG00000000184(EIF2AK3),ENSBTAG00000000222(ARID4B),ENSBTAG00000000231(BMPR1A),ENSBTAG00000000252(POLE3),ENS…
CC	GO:0045121	membrane raft	7.5e-07	1.97139e-05	ENSBTAG00000000231(BMPR1A),ENSBTAG00000000469(PPP2CA),ENSBTAG00000000484(HYAL2),ENSBTAG00000000570(RET),ENSBTAG00000000736(LRP8),ENSBTAG00000000745(AQP1),ENSBTAG00000000782(KDR),ENSBTAG00000000894(PGK1),ENSBTAG00000001027(SERPINH1),ENSBTAG00000001192(STX12),ENSBTAG00000001332(MYO1C),ENSBTAG00000001882(CD79A),ENSBTAG00000002010(PI4K2A),ENSBTAG00000002075(MME),ENSBTAG00000002117(KIF18A),ENSBTAG0000…
BP	GO:2000021	regulation of ion homeostasis	7.6e-07	1.99229e-05	ENSBTAG00000000428(BAK1),ENSBTAG00000000494(PDE4D),ENSBTAG00000000782(KDR),ENSBTAG00000000842(UBASH3B),ENSBTAG00000001575(CALM2),ENSBTAG00000001725(CXCL10),ENSBTAG00000001835(GJA1),ENSBTAG00000002062(TRPA1),ENSBTAG00000002232(TRPC1),ENSBTAG00000003409(FKBP1B),ENSBTAG00000003430(EPO),ENSBTAG00000003491(SLC25A23),ENSBTAG00000003505(DCN),ENSBTAG00000003826(SCN1B),ENSBTAG00000005048(DHRS7C),ENSBTAG00…
BP	GO:0001818	negative regulation of cytokine production	7.6e-07	1.99229e-05	ENSBTAG00000000095(CD274),ENSBTAG00000000223(PPM1B),ENSBTAG00000000322(CD2AP),ENSBTAG00000000415(ERBIN),ENSBTAG00000000436(TNFAIP3),ENSBTAG00000000437(FFAR4),ENSBTAG00000000604(GPNMB),ENSBTAG00000000640(SELENOS),ENSBTAG00000000778(HSP90AB1),ENSBTAG00000000815(EPHA2),ENSBTAG00000000843(NDRG2),ENSBTAG00000000871(TRIM27),ENSBTAG00000001105(ANXA4),ENSBTAG00000001273(NLRP3),ENSBTAG00000001292(LTF),ENS…
BP	GO:0010001	glial cell differentiation	7.7e-07	2.01307e-05	ENSBTAG00000000266(NAB1),ENSBTAG00000000540(RNF112),ENSBTAG00000000541(NKX2-1),ENSBTAG00000000569(HES1),ENSBTAG00000000696(ILK),ENSBTAG00000000711(NDRG1),ENSBTAG00000001321(IL1B),ENSBTAG00000001400(AKT2),ENSBTAG00000001729(DUSP10),ENSBTAG00000001776(SIRT2),ENSBTAG00000001866(EMX1),ENSBTAG00000002048(PTPN11),ENSBTAG00000002072(ERCC2),ENSBTAG00000002317(PTN),ENSBTAG00000002414(KCNJ10),ENSBTAG000000…
BP	GO:0006470	protein dephosphorylation	7.7e-07	2.01307e-05	ENSBTAG00000000199(PDP1),ENSBTAG00000000223(PPM1B),ENSBTAG00000000253(PTPRF),ENSBTAG00000000469(PPP2CA),ENSBTAG00000000545(PPP4R3B),ENSBTAG00000000653(PPP1R16B),ENSBTAG00000000754(PPP2R5A),ENSBTAG00000000778(HSP90AB1),ENSBTAG00000000842(UBASH3B),ENSBTAG00000001030(MTMR3),ENSBTAG00000001294(PPP1R15A),ENSBTAG00000001575(CALM2),ENSBTAG00000001729(DUSP10),ENSBTAG00000001809(DUSP21),ENSBTAG00000001862…
BP	GO:0006650	glycerophospholipid metabolic process	7.8e-07	2.03648e-05	ENSBTAG00000000019(SERINC1),ENSBTAG00000000065(CRLS1),ENSBTAG00000000675(PGS1),ENSBTAG00000000690(THEM5),ENSBTAG00000000710(PIP5K1C),ENSBTAG00000000817(SYNJ2),ENSBTAG00000000944(LPCAT1),ENSBTAG00000001030(MTMR3),ENSBTAG00000001354(INPP5E),ENSBTAG00000001420(ABHD12),ENSBTAG00000001868(PCYT2),ENSBTAG00000002010(PI4K2A),ENSBTAG00000002128(MPPE1),ENSBTAG00000002130(SMPD4),ENSBTAG00000002187(SERINC3),…
BP	GO:0072507	divalent inorganic cation homeostasis	8e-07	2.0859e-05	ENSBTAG00000000031(TRPV4),ENSBTAG00000000292(TCIRG1),ENSBTAG00000000312(GRINA),ENSBTAG00000000428(BAK1),ENSBTAG00000000494(PDE4D),ENSBTAG00000000520(ATP2B3),ENSBTAG00000000842(UBASH3B),ENSBTAG00000000898(F2RL2),ENSBTAG00000001013(SLC30A5),ENSBTAG00000001060(CXCR4),ENSBTAG00000001075(CALB2),ENSBTAG00000001269(TMEM165),ENSBTAG00000001398(ATP2A2),ENSBTAG00000001475(MCUR1),ENSBTAG00000001516(CALCB),E…
BP	GO:0000070	mitotic sister chromatid segregation	8.1e-07	2.10914e-05	ENSBTAG00000000500(PINX1),ENSBTAG00000000579(NIPBL),ENSBTAG00000000752(SGO1),ENSBTAG00000001323(CENPC),ENSBTAG00000001463(TNKS),ENSBTAG00000001631(KIFC1),ENSBTAG00000001698(CHTF8),ENSBTAG00000001717(AURKB),ENSBTAG00000001848(KATNB1),ENSBTAG00000001937(ANAPC11),ENSBTAG00000002117(KIF18A),ENSBTAG00000002260(NCAPD3),ENSBTAG00000002474(MAD1L1),ENSBTAG00000002726(CDC27),ENSBTAG00000002999(ANAPC15),ENS…
BP	GO:0002009	morphogenesis of an epithelium	8.2e-07	2.12948e-05	ENSBTAG00000000009(FOXF1),ENSBTAG00000000182(SPINT2),ENSBTAG00000000283(CSF1),ENSBTAG00000000305(LMO4),ENSBTAG00000000342(PLOD3),ENSBTAG00000000541(NKX2-1),ENSBTAG00000000569(HES1),ENSBTAG00000000570(RET),ENSBTAG00000000575(TNC),ENSBTAG00000000619(KRT74),ENSBTAG00000000696(ILK),ENSBTAG00000000809(IRX1),ENSBTAG00000000815(EPHA2),ENSBTAG00000001024(ARID1A),ENSBTAG00000001209(PHLDB2),ENSBTAG00000001…
BP	GO:0072503	cellular divalent inorganic cation homeostasis	8.2e-07	2.12948e-05	ENSBTAG00000000031(TRPV4),ENSBTAG00000000292(TCIRG1),ENSBTAG00000000312(GRINA),ENSBTAG00000000428(BAK1),ENSBTAG00000000494(PDE4D),ENSBTAG00000000520(ATP2B3),ENSBTAG00000000842(UBASH3B),ENSBTAG00000000898(F2RL2),ENSBTAG00000001013(SLC30A5),ENSBTAG00000001060(CXCR4),ENSBTAG00000001075(CALB2),ENSBTAG00000001269(TMEM165),ENSBTAG00000001398(ATP2A2),ENSBTAG00000001475(MCUR1),ENSBTAG00000001516(CALCB),E…
MF	GO:0048306	calcium-dependent protein binding	8.4e-07	2.17561e-05	ENSBTAG00000001105(ANXA4),ENSBTAG00000002454(ALG2),ENSBTAG00000004777(S100B),ENSBTAG00000005189(SPACA9),ENSBTAG00000007049(MBL2),ENSBTAG00000008064(VPS37C),ENSBTAG00000008766(SLC9A1),ENSBTAG00000010153(ANXA3),ENSBTAG00000010378(PEF1),ENSBTAG00000011500(CASQ2),ENSBTAG00000012467(MASP1),ENSBTAG00000012808(MASP2),ENSBTAG00000013563(TSG101),ENSBTAG00000014809(ANXA6),ENSBTAG00000015145(S100A11),ENSBTA…
BP	GO:0005996	monosaccharide metabolic process	8.4e-07	2.17561e-05	ENSBTAG00000000013(PRKAA1),ENSBTAG00000000152(RANBP2),ENSBTAG00000000286(PFKM),ENSBTAG00000000442(RBP4),ENSBTAG00000000497(AKR1A1),ENSBTAG00000000545(PPP4R3B),ENSBTAG00000000730(GCG),ENSBTAG00000000746(KAT2B),ENSBTAG00000000785(PASK),ENSBTAG00000000894(PGK1),ENSBTAG00000000902(OGT),ENSBTAG00000001069(TP53),ENSBTAG00000001400(AKT2),ENSBTAG00000001440(PMM2),ENSBTAG00000001578(ADPGK),ENSBTAG00000001…
BP	GO:0051960	regulation of nervous system development	8.6e-07	2.2215e-05	ENSBTAG00000000113(ARHGEF2),ENSBTAG00000000164(GNRH1),ENSBTAG00000000205(MMD),ENSBTAG00000000231(BMPR1A),ENSBTAG00000000253(PTPRF),ENSBTAG00000000283(CSF1),ENSBTAG00000000540(RNF112),ENSBTAG00000000569(HES1),ENSBTAG00000000570(RET),ENSBTAG00000000579(NIPBL),ENSBTAG00000000588(CHODL),ENSBTAG00000000616(GPR161),ENSBTAG00000000919(HEY2),ENSBTAG00000000962(STAP1),ENSBTAG00000001028(MAP6),ENSBTAG00000…
BP	GO:0048729	tissue morphogenesis	8.6e-07	2.2215e-05	ENSBTAG00000000009(FOXF1),ENSBTAG00000000182(SPINT2),ENSBTAG00000000231(BMPR1A),ENSBTAG00000000283(CSF1),ENSBTAG00000000305(LMO4),ENSBTAG00000000342(PLOD3),ENSBTAG00000000541(NKX2-1),ENSBTAG00000000569(HES1),ENSBTAG00000000570(RET),ENSBTAG00000000575(TNC),ENSBTAG00000000619(KRT74),ENSBTAG00000000696(ILK),ENSBTAG00000000809(IRX1),ENSBTAG00000000815(EPHA2),ENSBTAG00000000919(HEY2),ENSBTAG0000000099…
BP	GO:0034249	negative regulation of cellular amide metabolic process	9.1e-07	2.34753e-05	ENSBTAG00000000399(NANOS3),ENSBTAG00000000435(TARBP2),ENSBTAG00000000546(TOB1),ENSBTAG00000000613(ELAVL1),ENSBTAG00000000623,ENSBTAG00000000738(DAPK1),ENSBTAG00000001069(TP53),ENSBTAG00000001096(PRKRA),ENSBTAG00000001134(SRRT),ENSBTAG00000001333(PPARG),ENSBTAG00000001468(SAMD4A),ENSBTAG00000001737(TUT7),ENSBTAG00000002363(SESN2),ENSBTAG00000002504(IREB2),ENSBTAG00000002782(ZC3H7B),ENSBTAG00000003…
BP	GO:0051259	protein oligomerization	9.2e-07	2.36705e-05	ENSBTAG00000000077(ADSL),ENSBTAG00000000184(EIF2AK3),ENSBTAG00000000251(ALAD),ENSBTAG00000000404(NAXE),ENSBTAG00000000613(ELAVL1),ENSBTAG00000000694(TAF10),ENSBTAG00000000838(CCDC88C),ENSBTAG00000000871(TRIM27),ENSBTAG00000000900(LRRC8C),ENSBTAG00000001008(PRF1),ENSBTAG00000001069(TP53),ENSBTAG00000001139(ACHE),ENSBTAG00000001325(UPB1),ENSBTAG00000001503(TRIM72),ENSBTAG00000001632(NBR1),ENSBTAG00…
BP	GO:0002791	regulation of peptide secretion	9.2e-07	2.36705e-05	ENSBTAG00000000031(TRPV4),ENSBTAG00000000095(CD274),ENSBTAG00000000259(CHIA),ENSBTAG00000000264(RFX6),ENSBTAG00000000286(PFKM),ENSBTAG00000000292(TCIRG1),ENSBTAG00000000322(CD2AP),ENSBTAG00000000436(TNFAIP3),ENSBTAG00000000437(FFAR4),ENSBTAG00000000442(RBP4),ENSBTAG00000000484(HYAL2),ENSBTAG00000000730(GCG),ENSBTAG00000000785(PASK),ENSBTAG00000000799(ICA1),ENSBTAG00000000819(RFX3),ENSBTAG00000000…
BP	GO:0043900	regulation of multi-organism process	9.5e-07	2.44101e-05	ENSBTAG00000000016(LTA),ENSBTAG00000000188(HS3ST5),ENSBTAG00000000223(PPM1B),ENSBTAG00000000241(STAU1),ENSBTAG00000000435(TARBP2),ENSBTAG00000000436(TNFAIP3),ENSBTAG00000000504(GTF2B),ENSBTAG00000000563(MYD88),ENSBTAG00000000871(TRIM27),ENSBTAG00000000892(CGAS),ENSBTAG00000001008(PRF1),ENSBTAG00000001061(PRKCA),ENSBTAG00000001101(IFNLR1),ENSBTAG00000001292(LTF),ENSBTAG00000001321(IL1B),ENSBTAG000…
CC	GO:0070161	anchoring junction	9.6e-07	2.46345e-05	ENSBTAG00000000031(TRPV4),ENSBTAG00000000357(PRAG1),ENSBTAG00000000696(ILK),ENSBTAG00000000700(PARVA),ENSBTAG00000000711(NDRG1),ENSBTAG00000000815(EPHA2),ENSBTAG00000001004(ESAM),ENSBTAG00000001153(TLE2),ENSBTAG00000001204(JCAD),ENSBTAG00000001209(PHLDB2),ENSBTAG00000001393(MTF2),ENSBTAG00000001460(LIN7C),ENSBTAG00000001739(CDH20),ENSBTAG00000001835(GJA1),ENSBTAG00000002350(PIK3R2),ENSBTAG0000000…
BP	GO:0051961	negative regulation of nervous system development	9.7e-07	2.48583e-05	ENSBTAG00000000113(ARHGEF2),ENSBTAG00000000164(GNRH1),ENSBTAG00000000231(BMPR1A),ENSBTAG00000000569(HES1),ENSBTAG00000000616(GPR161),ENSBTAG00000000962(STAP1),ENSBTAG00000001069(TP53),ENSBTAG00000001228(CEND1),ENSBTAG00000001241(ISL1),ENSBTAG00000001612(LSM1),ENSBTAG00000001801(SYT4),ENSBTAG00000001941(SEMA4D),ENSBTAG00000002261(LBX1),ENSBTAG00000002317(PTN),ENSBTAG00000002483(HES5),ENSBTAG000000…
BP	GO:0006873	cellular ion homeostasis	1e-06	2.55262e-05	ENSBTAG00000000031(TRPV4),ENSBTAG00000000203(ATP6V1G1),ENSBTAG00000000292(TCIRG1),ENSBTAG00000000312(GRINA),ENSBTAG00000000428(BAK1),ENSBTAG00000000494(PDE4D),ENSBTAG00000000520(ATP2B3),ENSBTAG00000000555(ACO1),ENSBTAG00000000737(DMXL2),ENSBTAG00000000842(UBASH3B),ENSBTAG00000000898(F2RL2),ENSBTAG00000001013(SLC30A5),ENSBTAG00000001015(TM9SF4),ENSBTAG00000001060(CXCR4),ENSBTAG00000001075(CALB2),E…
BP	GO:0002683	negative regulation of immune system process	1e-06	2.55262e-05	ENSBTAG00000000009(FOXF1),ENSBTAG00000000095(CD274),ENSBTAG00000000223(PPM1B),ENSBTAG00000000415(ERBIN),ENSBTAG00000000435(TARBP2),ENSBTAG00000000436(TNFAIP3),ENSBTAG00000000569(HES1),ENSBTAG00000000604(GPNMB),ENSBTAG00000000640(SELENOS),ENSBTAG00000000842(UBASH3B),ENSBTAG00000000871(TRIM27),ENSBTAG00000000962(STAP1),ENSBTAG00000001292(LTF),ENSBTAG00000001333(PPARG),ENSBTAG00000001511(BCL6),ENSBT…
BP	GO:0016569	covalent chromatin modification	1e-06	2.55262e-05	ENSBTAG00000000013(PRKAA1),ENSBTAG00000000023(RNF2),ENSBTAG00000000039(SIRT7),ENSBTAG00000000098(SETDB1),ENSBTAG00000000222(ARID4B),ENSBTAG00000000252(POLE3),ENSBTAG00000000343(ZNHIT1),ENSBTAG00000000579(NIPBL),ENSBTAG00000000694(TAF10),ENSBTAG00000000730(GCG),ENSBTAG00000000746(KAT2B),ENSBTAG00000000895(TAF9B),ENSBTAG00000000902(OGT),ENSBTAG00000000978(ASH2L),ENSBTAG00000001061(PRKCA),ENSBTAG000…
MF	GO:0016747	transferase activity, transferring acyl groups other than amino-acyl groups	1.1e-06	2.77871e-05	ENSBTAG00000000099(CERS2),ENSBTAG00000000252(POLE3),ENSBTAG00000000274(YKT6),ENSBTAG00000000504(GTF2B),ENSBTAG00000000694(TAF10),ENSBTAG00000000746(KAT2B),ENSBTAG00000000895(TAF9B),ENSBTAG00000000902(OGT),ENSBTAG00000000944(LPCAT1),ENSBTAG00000001016(NAA35),ENSBTAG00000001144(NAA20),ENSBTAG00000001417(ACSM1),ENSBTAG00000001552(EPC1),ENSBTAG00000001932(CRAT),ENSBTAG00000002220(SPTLC1),ENSBTAG00000…
MF	GO:0019842	vitamin binding	1.1e-06	2.77871e-05	ENSBTAG00000000160(CBS),ENSBTAG00000000291(DHTKD1),ENSBTAG00000000342(PLOD3),ENSBTAG00000000442(RBP4),ENSBTAG00000000505(KYAT3),ENSBTAG00000001032(PYGM),ENSBTAG00000001116(P4HA2),ENSBTAG00000001171(OGFOD1),ENSBTAG00000001310(RHO),ENSBTAG00000002052(PLOD1),ENSBTAG00000002214(TAT),ENSBTAG00000002220(SPTLC1),ENSBTAG00000002770(TCN2),ENSBTAG00000002817(SLC46A1),ENSBTAG00000002980(GPT2),ENSBTAG0000000…
BP	GO:0009611	response to wounding	1.1e-06	2.77871e-05	ENSBTAG00000000009(FOXF1),ENSBTAG00000000026(VPS33B),ENSBTAG00000000253(PTPRF),ENSBTAG00000000405(VKORC1),ENSBTAG00000000435(TARBP2),ENSBTAG00000000575(TNC),ENSBTAG00000000745(AQP1),ENSBTAG00000000842(UBASH3B),ENSBTAG00000000898(F2RL2),ENSBTAG00000001061(PRKCA),ENSBTAG00000001209(PHLDB2),ENSBTAG00000001271(PLG),ENSBTAG00000001503(TRIM72),ENSBTAG00000001509(ELK3),ENSBTAG00000001638(FGA),ENSBTAG000…
BP	GO:0050708	regulation of protein secretion	1.1e-06	2.77871e-05	ENSBTAG00000000031(TRPV4),ENSBTAG00000000095(CD274),ENSBTAG00000000259(CHIA),ENSBTAG00000000264(RFX6),ENSBTAG00000000286(PFKM),ENSBTAG00000000292(TCIRG1),ENSBTAG00000000322(CD2AP),ENSBTAG00000000436(TNFAIP3),ENSBTAG00000000437(FFAR4),ENSBTAG00000000442(RBP4),ENSBTAG00000000484(HYAL2),ENSBTAG00000000730(GCG),ENSBTAG00000000799(ICA1),ENSBTAG00000000819(RFX3),ENSBTAG00000000871(TRIM27),ENSBTAG000000…
BP	GO:0051147	regulation of muscle cell differentiation	1.1e-06	2.77871e-05	ENSBTAG00000000009(FOXF1),ENSBTAG00000000092(HIF1AN),ENSBTAG00000000329(MEGF10),ENSBTAG00000000435(TARBP2),ENSBTAG00000000656(NFATC1),ENSBTAG00000000992(BMP10),ENSBTAG00000001449(SRA1),ENSBTAG00000001503(TRIM72),ENSBTAG00000001725(CXCL10),ENSBTAG00000002080(CCN3),ENSBTAG00000002092(PI16),ENSBTAG00000002216(MYOD1),ENSBTAG00000002283(FZD7),ENSBTAG00000002333(HOPX),ENSBTAG00000002699(KIT),ENSBTAG000…
BP	GO:0000122	negative regulation of transcription from RNA polymerase II promoter	1.1e-06	2.77871e-05	ENSBTAG00000000009(FOXF1),ENSBTAG00000000023(RNF2),ENSBTAG00000000031(TRPV4),ENSBTAG00000000039(SIRT7),ENSBTAG00000000074(NFIA),ENSBTAG00000000092(HIF1AN),ENSBTAG00000000332(ERF),ENSBTAG00000000541(NKX2-1),ENSBTAG00000000569(HES1),ENSBTAG00000000579(NIPBL),ENSBTAG00000000753(PIAS4),ENSBTAG00000000809(IRX1),ENSBTAG00000000816(PRDM1),ENSBTAG00000000871(TRIM27),ENSBTAG00000000895(TAF9B),ENSBTAG00000…
BP	GO:0007249	I-kappaB kinase/NF-kappaB signaling	1.1e-06	2.77871e-05	ENSBTAG00000000223(PPM1B),ENSBTAG00000000436(TNFAIP3),ENSBTAG00000000563(MYD88),ENSBTAG00000001292(LTF),ENSBTAG00000001321(IL1B),ENSBTAG00000001835(GJA1),ENSBTAG00000002085(IL36G),ENSBTAG00000002578(ZMYND11),ENSBTAG00000002625(MAP3K7),ENSBTAG00000002632(CSN2),ENSBTAG00000003098(MTDH),ENSBTAG00000003255(CD4),ENSBTAG00000003954(ASH1L),ENSBTAG00000004117(AZI2),ENSBTAG00000004211(TNFRSF1A),ENSBTAG000…
CC	GO:0031965	nuclear membrane	1.1e-06	2.77871e-05	ENSBTAG00000000099(CERS2),ENSBTAG00000000152(RANBP2),ENSBTAG00000000494(PDE4D),ENSBTAG00000000507(NR4A1),ENSBTAG00000000745(AQP1),ENSBTAG00000000871(TRIM27),ENSBTAG00000000878(RB1CC1),ENSBTAG00000001105(ANXA4),ENSBTAG00000001112(SMOX),ENSBTAG00000001168(BRAP),ENSBTAG00000001463(TNKS),ENSBTAG00000001470(DTX2),ENSBTAG00000001552(EPC1),ENSBTAG00000001697(TRA2B),ENSBTAG00000001768(TXLNG),ENSBTAG00000…
MF	GO:0008009	chemokine activity	1.2e-06	3.01956e-05	ENSBTAG00000001191(CCL17),ENSBTAG00000001557(CCL28),ENSBTAG00000001725(CXCL10),ENSBTAG00000003289,ENSBTAG00000004129(CCL11),ENSBTAG00000005077(CXCL12),ENSBTAG00000005581(CCL25),ENSBTAG00000005603(CXCL11),ENSBTAG00000006694(CXCL14),ENSBTAG00000008479(CXCL13),ENSBTAG00000008832(CCL1),ENSBTAG00000009812(CXCL5),ENSBTAG00000009938(XCL1),ENSBTAG00000009943,ENSBTAG00000010155,ENSBTAG00000010161(CCL21),E…
BP	GO:0034976	response to endoplasmic reticulum stress	1.2e-06	3.01956e-05	ENSBTAG00000000067(SDF2L1),ENSBTAG00000000081(COL4A3BP),ENSBTAG00000000184(EIF2AK3),ENSBTAG00000000312(GRINA),ENSBTAG00000000321(TBL2),ENSBTAG00000000428(BAK1),ENSBTAG00000000640(SELENOS),ENSBTAG00000001069(TP53),ENSBTAG00000001294(PPP1R15A),ENSBTAG00000001823(STC2),ENSBTAG00000002187(SERINC3),ENSBTAG00000002286(DNAJC18),ENSBTAG00000002350(PIK3R2),ENSBTAG00000002363(SESN2),ENSBTAG00000002704(POMT…
BP	GO:0051090	regulation of DNA binding transcription factor activity	1.2e-06	3.01956e-05	ENSBTAG00000000023(RNF2),ENSBTAG00000000113(ARHGEF2),ENSBTAG00000000396(PIM1),ENSBTAG00000000415(ERBIN),ENSBTAG00000000436(TNFAIP3),ENSBTAG00000000455(CREBZF),ENSBTAG00000000563(MYD88),ENSBTAG00000000753(PIAS4),ENSBTAG00000000871(TRIM27),ENSBTAG00000001009(HCLS1),ENSBTAG00000001034(IL18R1),ENSBTAG00000001105(ANXA4),ENSBTAG00000001221(NKX3-1),ENSBTAG00000001273(NLRP3),ENSBTAG00000001292(LTF),ENSBT…
BP	GO:0050678	regulation of epithelial cell proliferation	1.3e-06	3.25854e-05	ENSBTAG00000000231(BMPR1A),ENSBTAG00000000436(TNFAIP3),ENSBTAG00000000483(HYAL1),ENSBTAG00000000507(NR4A1),ENSBTAG00000000569(HES1),ENSBTAG00000000653(PPP1R16B),ENSBTAG00000000782(KDR),ENSBTAG00000001061(PRKCA),ENSBTAG00000001204(JCAD),ENSBTAG00000001221(NKX3-1),ENSBTAG00000001333(PPARG),ENSBTAG00000001462(FLT4),ENSBTAG00000001539(SAV1),ENSBTAG00000001700(CDC42),ENSBTAG00000001729(DUSP10),ENSBTAG…
BP	GO:0010639	negative regulation of organelle organization	1.3e-06	3.25854e-05	ENSBTAG00000000113(ARHGEF2),ENSBTAG00000000267(SMG6),ENSBTAG00000000369(EPS8),ENSBTAG00000000500(PINX1),ENSBTAG00000000746(KAT2B),ENSBTAG00000001069(TP53),ENSBTAG00000001209(PHLDB2),ENSBTAG00000001225(RBM14),ENSBTAG00000001306(FXN),ENSBTAG00000001393(MTF2),ENSBTAG00000001463(TNKS),ENSBTAG00000001567(LRRK1),ENSBTAG00000001592(INSIG1),ENSBTAG00000001634(PHF1),ENSBTAG00000001717(AURKB),ENSBTAG000000…
BP	GO:0097479	synaptic vesicle localization	1.3e-06	3.25854e-05	ENSBTAG00000000529(BTBD9),ENSBTAG00000000764(GIPC1),ENSBTAG00000001243(AP3M2),ENSBTAG00000001398(ATP2A2),ENSBTAG00000001407(AP3S2),ENSBTAG00000001599(SV2A),ENSBTAG00000001657(PICALM),ENSBTAG00000001801(SYT4),ENSBTAG00000001918(STXBP5L),ENSBTAG00000002297(CACNB4),ENSBTAG00000002309(CSPG5),ENSBTAG00000002349(STX1B),ENSBTAG00000002522(SYT5),ENSBTAG00000002844(PPFIA3),ENSBTAG00000003063(SYNJ1),ENSBTA…
MF	GO:0019902	phosphatase binding	1.4e-06	3.48228e-05	ENSBTAG00000000184(EIF2AK3),ENSBTAG00000000460(SYTL2),ENSBTAG00000000511(CNST),ENSBTAG00000001030(MTMR3),ENSBTAG00000001069(TP53),ENSBTAG00000001462(FLT4),ENSBTAG00000001933(PTPA),ENSBTAG00000002236(TRPC4AP),ENSBTAG00000002326(LGALS3),ENSBTAG00000002726(CDC27),ENSBTAG00000002727(PHACTR4),ENSBTAG00000003051(FER),ENSBTAG00000003092(ANAPC5),ENSBTAG00000003147(JAK1),ENSBTAG00000003362(HSP90B1),ENSBTA…
BP	GO:0006875	cellular metal ion homeostasis	1.4e-06	3.48228e-05	ENSBTAG00000000031(TRPV4),ENSBTAG00000000203(ATP6V1G1),ENSBTAG00000000292(TCIRG1),ENSBTAG00000000312(GRINA),ENSBTAG00000000428(BAK1),ENSBTAG00000000494(PDE4D),ENSBTAG00000000520(ATP2B3),ENSBTAG00000000555(ACO1),ENSBTAG00000000842(UBASH3B),ENSBTAG00000000898(F2RL2),ENSBTAG00000001013(SLC30A5),ENSBTAG00000001060(CXCR4),ENSBTAG00000001075(CALB2),ENSBTAG00000001246(ATP1A1),ENSBTAG00000001269(TMEM165)…
BP	GO:0048666	neuron development	1.4e-06	3.48228e-05	ENSBTAG00000000056(STRADA),ENSBTAG00000000088(ALCAM),ENSBTAG00000000109(NPTXR),ENSBTAG00000000137(FRYL),ENSBTAG00000000253(PTPRF),ENSBTAG00000000365(TDP2),ENSBTAG00000000413(NRTN),ENSBTAG00000000445(PDE6C),ENSBTAG00000000541(NKX2-1),ENSBTAG00000000569(HES1),ENSBTAG00000000570(RET),ENSBTAG00000000575(TNC),ENSBTAG00000000588(CHODL),ENSBTAG00000000778(HSP90AB1),ENSBTAG00000000815(EPHA2),ENSBTAG00000…
BP	GO:0071901	negative regulation of protein serine/threonine kinase activity	1.4e-06	3.48228e-05	ENSBTAG00000000436(TNFAIP3),ENSBTAG00000000484(HYAL2),ENSBTAG00000000746(KAT2B),ENSBTAG00000001321(IL1B),ENSBTAG00000001729(DUSP10),ENSBTAG00000001774(SPRY2),ENSBTAG00000001809(DUSP21),ENSBTAG00000002095(MEN1),ENSBTAG00000002883(RPTOR),ENSBTAG00000003966(DUSP3),ENSBTAG00000004394(PKIB),ENSBTAG00000004587(DUSP6),ENSBTAG00000004658(WEE2),ENSBTAG00000005275(PKIG),ENSBTAG00000006056(HEXIM1),ENSBTAG00…
BP	GO:0000302	response to reactive oxygen species	1.4e-06	3.48228e-05	ENSBTAG00000000013(PRKAA1),ENSBTAG00000000042(PYCR1),ENSBTAG00000000436(TNFAIP3),ENSBTAG00000000483(HYAL1),ENSBTAG00000000484(HYAL2),ENSBTAG00000000540(RNF112),ENSBTAG00000000745(AQP1),ENSBTAG00000001014(MAPK7),ENSBTAG00000001306(FXN),ENSBTAG00000001864(NR4A3),ENSBTAG00000002062(TRPA1),ENSBTAG00000002363(SESN2),ENSBTAG00000003015(SESN1),ENSBTAG00000003035(IMPACT),ENSBTAG00000003051(FER),ENSBTAG00…
BP	GO:0010959	regulation of metal ion transport	1.4e-06	3.48228e-05	ENSBTAG00000000428(BAK1),ENSBTAG00000000494(PDE4D),ENSBTAG00000000512(SNTA1),ENSBTAG00000000730(GCG),ENSBTAG00000000842(UBASH3B),ENSBTAG00000000871(TRIM27),ENSBTAG00000001150(KCNE1),ENSBTAG00000001246(ATP1A1),ENSBTAG00000001575(CALM2),ENSBTAG00000001662(EHD3),ENSBTAG00000001687(STC1),ENSBTAG00000001725(CXCL10),ENSBTAG00000001823(STC2),ENSBTAG00000001861(SESTD1),ENSBTAG00000002036(CACNB1),ENSBTAG0…
BP	GO:0048771	tissue remodeling	1.5e-06	3.72149e-05	ENSBTAG00000000292(TCIRG1),ENSBTAG00000000428(BAK1),ENSBTAG00000000604(GPNMB),ENSBTAG00000000815(EPHA2),ENSBTAG00000000842(UBASH3B),ENSBTAG00000001069(TP53),ENSBTAG00000001271(PLG),ENSBTAG00000001462(FLT4),ENSBTAG00000001567(LRRK1),ENSBTAG00000001835(GJA1),ENSBTAG00000002144(ADRB2),ENSBTAG00000002148(RAB3D),ENSBTAG00000002317(PTN),ENSBTAG00000002606(LGR4),ENSBTAG00000002940(WNT16),ENSBTAG00000003…
BP	GO:0010467	gene expression	1.5e-06	3.72149e-05	ENSBTAG00000000009(FOXF1),ENSBTAG00000000013(PRKAA1),ENSBTAG00000000023(RNF2),ENSBTAG00000000031(TRPV4),ENSBTAG00000000039(SIRT7),ENSBTAG00000000040(MAFG),ENSBTAG00000000054(SNAPC4),ENSBTAG00000000072(TFB2M),ENSBTAG00000000074(NFIA),ENSBTAG00000000085(CYP1A2),ENSBTAG00000000092(HIF1AN),ENSBTAG00000000098(SETDB1),ENSBTAG00000000103(MRPL23),ENSBTAG00000000113(ARHGEF2),ENSBTAG00000000124(DHH),ENSBTA…
BP	GO:0051047	positive regulation of secretion	1.7e-06	4.19628e-05	ENSBTAG00000000031(TRPV4),ENSBTAG00000000095(CD274),ENSBTAG00000000259(CHIA),ENSBTAG00000000264(RFX6),ENSBTAG00000000286(PFKM),ENSBTAG00000000322(CD2AP),ENSBTAG00000000411(HGS),ENSBTAG00000000442(RBP4),ENSBTAG00000000460(SYTL2),ENSBTAG00000000484(HYAL2),ENSBTAG00000000730(GCG),ENSBTAG00000000745(AQP1),ENSBTAG00000001221(NKX3-1),ENSBTAG00000001273(NLRP3),ENSBTAG00000001321(IL1B),ENSBTAG00000001801…
BP	GO:0010721	negative regulation of cell development	1.7e-06	4.19628e-05	ENSBTAG00000000113(ARHGEF2),ENSBTAG00000000164(GNRH1),ENSBTAG00000000231(BMPR1A),ENSBTAG00000000569(HES1),ENSBTAG00000000962(STAP1),ENSBTAG00000001069(TP53),ENSBTAG00000001241(ISL1),ENSBTAG00000001292(LTF),ENSBTAG00000001612(LSM1),ENSBTAG00000001801(SYT4),ENSBTAG00000001941(SEMA4D),ENSBTAG00000002092(PI16),ENSBTAG00000002261(LBX1),ENSBTAG00000002278(FBN1),ENSBTAG00000002317(PTN),ENSBTAG0000000248…
BP	GO:0023061	signal release	1.7e-06	4.19628e-05	ENSBTAG00000000031(TRPV4),ENSBTAG00000000264(RFX6),ENSBTAG00000000286(PFKM),ENSBTAG00000000292(TCIRG1),ENSBTAG00000000437(FFAR4),ENSBTAG00000000442(RBP4),ENSBTAG00000000730(GCG),ENSBTAG00000000745(AQP1),ENSBTAG00000000764(GIPC1),ENSBTAG00000000785(PASK),ENSBTAG00000000799(ICA1),ENSBTAG00000000819(RFX3),ENSBTAG00000000970(ASIC1),ENSBTAG00000001221(NKX3-1),ENSBTAG00000001321(IL1B),ENSBTAG0000000139…
CC	GO:0000776	kinetochore	1.7e-06	4.19628e-05	ENSBTAG00000000022(NUP37),ENSBTAG00000000162(ANAPC16),ENSBTAG00000000500(PINX1),ENSBTAG00000000744(DCTN6),ENSBTAG00000000746(KAT2B),ENSBTAG00000000752(SGO1),ENSBTAG00000001323(CENPC),ENSBTAG00000001717(AURKB),ENSBTAG00000002117(KIF18A),ENSBTAG00000002474(MAD1L1),ENSBTAG00000002608(SEPT2),ENSBTAG00000002613(MIS18BP1),ENSBTAG00000002655(ZWINT),ENSBTAG00000002705(REC8),ENSBTAG00000003314(SKA3),ENSBT…
MF	GO:0000978	RNA polymerase II core promoter proximal region sequence-specific DNA binding	1.8e-06	4.42627e-05	ENSBTAG00000000040(MAFG),ENSBTAG00000000074(NFIA),ENSBTAG00000000264(RFX6),ENSBTAG00000000507(NR4A1),ENSBTAG00000000536(ZNF395),ENSBTAG00000000541(NKX2-1),ENSBTAG00000000558(NEUROD6),ENSBTAG00000000565(RFX7),ENSBTAG00000000625(SMAD6),ENSBTAG00000000656(NFATC1),ENSBTAG00000000816(PRDM1),ENSBTAG00000000819(RFX3),ENSBTAG00000001002(TCF7),ENSBTAG00000001042(MXD1),ENSBTAG00000001069(TP53),ENSBTAG00000…
MF	GO:0140098	catalytic activity, acting on RNA	1.8e-06	4.42627e-05	ENSBTAG00000000064(FEN1),ENSBTAG00000000072(TFB2M),ENSBTAG00000000132(EIF4A1),ENSBTAG00000000197(TRMT10A),ENSBTAG00000000267(SMG6),ENSBTAG00000000365(TDP2),ENSBTAG00000000371(DIS3L),ENSBTAG00000000824(TSEN54),ENSBTAG00000000848(SNRNP200),ENSBTAG00000000974(IARS),ENSBTAG00000001044(SUPV3L1),ENSBTAG00000001518(ISG20L2),ENSBTAG00000001693(RPAP1),ENSBTAG00000001737(TUT7),ENSBTAG00000001780(SARS2),ENS…
BP	GO:0044089	positive regulation of cellular component biogenesis	1.8e-06	4.42627e-05	ENSBTAG00000000271(MNS1),ENSBTAG00000000369(EPS8),ENSBTAG00000000411(HGS),ENSBTAG00000000483(HYAL1),ENSBTAG00000000504(GTF2B),ENSBTAG00000000684(ARHGEF10L),ENSBTAG00000000782(KDR),ENSBTAG00000000815(EPHA2),ENSBTAG00000000871(TRIM27),ENSBTAG00000000897(IQGAP2),ENSBTAG00000000992(BMP10),ENSBTAG00000001069(TP53),ENSBTAG00000001176(LRRN1),ENSBTAG00000001209(PHLDB2),ENSBTAG00000001352(ENTR1),ENSBTAG00…
BP	GO:0034614	cellular response to reactive oxygen species	1.9e-06	4.66039e-05	ENSBTAG00000000042(PYCR1),ENSBTAG00000000436(TNFAIP3),ENSBTAG00000000540(RNF112),ENSBTAG00000000745(AQP1),ENSBTAG00000001014(MAPK7),ENSBTAG00000001306(FXN),ENSBTAG00000001864(NR4A3),ENSBTAG00000003035(IMPACT),ENSBTAG00000003051(FER),ENSBTAG00000003305(NCF1),ENSBTAG00000003642(PRDX1),ENSBTAG00000003840(GUCY1B1),ENSBTAG00000004037(JUN),ENSBTAG00000004322(FOS),ENSBTAG00000004343(CCS),ENSBTAG00000004…
BP	GO:0050728	negative regulation of inflammatory response	1.9e-06	4.66039e-05	ENSBTAG00000000009(FOXF1),ENSBTAG00000000436(TNFAIP3),ENSBTAG00000000437(FFAR4),ENSBTAG00000000640(SELENOS),ENSBTAG00000001241(ISL1),ENSBTAG00000001273(NLRP3),ENSBTAG00000001694(TYRO3),ENSBTAG00000001729(DUSP10),ENSBTAG00000002080(CCN3),ENSBTAG00000002341(ETS1),ENSBTAG00000002493(VPS35),ENSBTAG00000002501(CUEDC2),ENSBTAG00000002632(CSN2),ENSBTAG00000002635(PGLYRP1),ENSBTAG00000003186(OTULIN),ENSB…
BP	GO:0030003	cellular cation homeostasis	2e-06	4.88719e-05	ENSBTAG00000000031(TRPV4),ENSBTAG00000000203(ATP6V1G1),ENSBTAG00000000292(TCIRG1),ENSBTAG00000000312(GRINA),ENSBTAG00000000428(BAK1),ENSBTAG00000000494(PDE4D),ENSBTAG00000000520(ATP2B3),ENSBTAG00000000555(ACO1),ENSBTAG00000000737(DMXL2),ENSBTAG00000000842(UBASH3B),ENSBTAG00000000898(F2RL2),ENSBTAG00000001013(SLC30A5),ENSBTAG00000001015(TM9SF4),ENSBTAG00000001060(CXCR4),ENSBTAG00000001075(CALB2),E…
BP	GO:0032103	positive regulation of response to external stimulus	2e-06	4.88719e-05	ENSBTAG00000000016(LTA),ENSBTAG00000000031(TRPV4),ENSBTAG00000000128(FGF18),ENSBTAG00000000283(CSF1),ENSBTAG00000000484(HYAL2),ENSBTAG00000000563(MYD88),ENSBTAG00000000782(KDR),ENSBTAG00000001061(PRKCA),ENSBTAG00000001321(IL1B),ENSBTAG00000001725(CXCL10),ENSBTAG00000001826(SASH1),ENSBTAG00000001915(APOH),ENSBTAG00000001987(SWAP70),ENSBTAG00000002006(THBS1),ENSBTAG00000002116(ZCCHC3),ENSBTAG000000…
CC	GO:0090575	RNA polymerase II transcription factor complex	2e-06	4.88719e-05	ENSBTAG00000000484(HYAL2),ENSBTAG00000000504(GTF2B),ENSBTAG00000000694(TAF10),ENSBTAG00000000895(TAF9B),ENSBTAG00000001069(TP53),ENSBTAG00000001333(PPARG),ENSBTAG00000001755(NEUROD1),ENSBTAG00000001979(TAF7L),ENSBTAG00000002072(ERCC2),ENSBTAG00000002335(HAND1),ENSBTAG00000002422(BCL9),ENSBTAG00000002586(TCF12),ENSBTAG00000002678(MED18),ENSBTAG00000002836(TAF3),ENSBTAG00000003264(NR1H2),ENSBTAG000…
CC	GO:0005770	late endosome	2.1e-06	5.12511e-05	ENSBTAG00000000026(VPS33B),ENSBTAG00000000224(TSPAN15),ENSBTAG00000000292(TCIRG1),ENSBTAG00000000411(HGS),ENSBTAG00000000564(NSG2),ENSBTAG00000000795(NMNAT2),ENSBTAG00000000831(CTNS),ENSBTAG00000001060(CXCR4),ENSBTAG00000001320(VPS16),ENSBTAG00000001632(NBR1),ENSBTAG00000001835(GJA1),ENSBTAG00000001882(CD79A),ENSBTAG00000001948(VTI1B),ENSBTAG00000002357(TICAM2),ENSBTAG00000002402(IGF2R),ENSBTAG00…
MF	GO:1901681	sulfur compound binding	2.2e-06	5.32904e-05	ENSBTAG00000000057(THBS3),ENSBTAG00000000073(LRPAP1),ENSBTAG00000000087(HSD17B12),ENSBTAG00000000253(PTPRF),ENSBTAG00000000291(DHTKD1),ENSBTAG00000000604(GPNMB),ENSBTAG00000000706(ADAMTS1),ENSBTAG00000000707(CCN4),ENSBTAG00000001105(ANXA4),ENSBTAG00000001151(APLP1),ENSBTAG00000001292(LTF),ENSBTAG00000001535(LIPH),ENSBTAG00000001725(CXCL10),ENSBTAG00000001842(GSTM3),ENSBTAG00000002006(THBS1),ENSBT…
BP	GO:0007015	actin filament organization	2.2e-06	5.32904e-05	ENSBTAG00000000021(WASHC3),ENSBTAG00000000031(TRPV4),ENSBTAG00000000113(ARHGEF2),ENSBTAG00000000322(CD2AP),ENSBTAG00000000347(RHOG),ENSBTAG00000000369(EPS8),ENSBTAG00000000684(ARHGEF10L),ENSBTAG00000000871(TRIM27),ENSBTAG00000000897(IQGAP2),ENSBTAG00000001009(HCLS1),ENSBTAG00000001209(PHLDB2),ENSBTAG00000001403(PRKCI),ENSBTAG00000001585(WIPF1),ENSBTAG00000001700(CDC42),ENSBTAG00000001815(ARHGEF5)…
BP	GO:0006513	protein monoubiquitination	2.2e-06	5.32904e-05	ENSBTAG00000000023(RNF2),ENSBTAG00000002224(UHRF1),ENSBTAG00000002612(FANCM),ENSBTAG00000003421(RNF40),ENSBTAG00000003741(NEURL1),ENSBTAG00000003745(WDR48),ENSBTAG00000003952(FBXL2),ENSBTAG00000004790(UBE2T),ENSBTAG00000004964(PCGF5),ENSBTAG00000005870(FANCL),ENSBTAG00000005905(TOPORS),ENSBTAG00000006122(HUWE1),ENSBTAG00000009516(RNF20),ENSBTAG00000009726(KLHL12),ENSBTAG00000009879(PCGF6),ENSBTAG…
BP	GO:0001819	positive regulation of cytokine production	2.2e-06	5.32904e-05	ENSBTAG00000000016(LTA),ENSBTAG00000000031(TRPV4),ENSBTAG00000000095(CD274),ENSBTAG00000000113(ARHGEF2),ENSBTAG00000000184(EIF2AK3),ENSBTAG00000000259(CHIA),ENSBTAG00000000484(HYAL2),ENSBTAG00000000494(PDE4D),ENSBTAG00000000563(MYD88),ENSBTAG00000000630(LSM14A),ENSBTAG00000000892(CGAS),ENSBTAG00000001034(IL18R1),ENSBTAG00000001241(ISL1),ENSBTAG00000001273(NLRP3),ENSBTAG00000001321(IL1B),ENSBTAG00…
BP	GO:0032846	positive regulation of homeostatic process	2.2e-06	5.32904e-05	ENSBTAG00000000264(RFX6),ENSBTAG00000000428(BAK1),ENSBTAG00000000668(SLC22A5),ENSBTAG00000000730(GCG),ENSBTAG00000001321(IL1B),ENSBTAG00000001463(TNKS),ENSBTAG00000001575(CALM2),ENSBTAG00000001717(AURKB),ENSBTAG00000001725(CXCL10),ENSBTAG00000002232(TRPC1),ENSBTAG00000002341(ETS1),ENSBTAG00000002798(NABP2),ENSBTAG00000003111(ATM),ENSBTAG00000003184(GATA1),ENSBTAG00000003409(FKBP1B),ENSBTAG0000000…
BP	GO:0006887	exocytosis	2.2e-06	5.32904e-05	ENSBTAG00000000009(FOXF1),ENSBTAG00000000021(WASHC3),ENSBTAG00000000026(VPS33B),ENSBTAG00000000274(YKT6),ENSBTAG00000000279(RAB26),ENSBTAG00000000411(HGS),ENSBTAG00000000460(SYTL2),ENSBTAG00000000764(GIPC1),ENSBTAG00000000985(RAB10),ENSBTAG00000001398(ATP2A2),ENSBTAG00000001460(LIN7C),ENSBTAG00000001599(SV2A),ENSBTAG00000001703(SYT13),ENSBTAG00000001801(SYT4),ENSBTAG00000001828(SCRN2),ENSBTAG0000…
BP	GO:0000819	sister chromatid segregation	2.3e-06	5.52995e-05	ENSBTAG00000000064(FEN1),ENSBTAG00000000500(PINX1),ENSBTAG00000000579(NIPBL),ENSBTAG00000000752(SGO1),ENSBTAG00000001323(CENPC),ENSBTAG00000001463(TNKS),ENSBTAG00000001567(LRRK1),ENSBTAG00000001631(KIFC1),ENSBTAG00000001698(CHTF8),ENSBTAG00000001717(AURKB),ENSBTAG00000001848(KATNB1),ENSBTAG00000001937(ANAPC11),ENSBTAG00000002117(KIF18A),ENSBTAG00000002260(NCAPD3),ENSBTAG00000002474(MAD1L1),ENSBTA…
BP	GO:0032944	regulation of mononuclear cell proliferation	2.3e-06	5.52995e-05	ENSBTAG00000000095(CD274),ENSBTAG00000000283(CSF1),ENSBTAG00000000317(MAPK8IP1),ENSBTAG00000000563(MYD88),ENSBTAG00000000569(HES1),ENSBTAG00000000604(GPNMB),ENSBTAG00000000888(SPTA1),ENSBTAG00000001321(IL1B),ENSBTAG00000001508(SH3RF1),ENSBTAG00000001511(BCL6),ENSBTAG00000001805(TWSG1),ENSBTAG00000002041(SASH3),ENSBTAG00000002326(LGALS3),ENSBTAG00000002474(MAD1L1),ENSBTAG00000003111(ATM),ENSBTAG00…
BP	GO:0045862	positive regulation of proteolysis	2.3e-06	5.52995e-05	ENSBTAG00000000428(BAK1),ENSBTAG00000000738(DAPK1),ENSBTAG00000000902(OGT),ENSBTAG00000001221(NKX3-1),ENSBTAG00000001273(NLRP3),ENSBTAG00000001321(IL1B),ENSBTAG00000001333(PPARG),ENSBTAG00000001657(PICALM),ENSBTAG00000001776(SIRT2),ENSBTAG00000002472(CASP9),ENSBTAG00000002833(FBXO22),ENSBTAG00000002998(MELTF),ENSBTAG00000003644(HSPBP1),ENSBTAG00000003745(WDR48),ENSBTAG00000003815(EDEM2),ENSBTAG00…
BP	GO:0006874	cellular calcium ion homeostasis	2.3e-06	5.52995e-05	ENSBTAG00000000031(TRPV4),ENSBTAG00000000292(TCIRG1),ENSBTAG00000000312(GRINA),ENSBTAG00000000428(BAK1),ENSBTAG00000000494(PDE4D),ENSBTAG00000000520(ATP2B3),ENSBTAG00000000842(UBASH3B),ENSBTAG00000000898(F2RL2),ENSBTAG00000001060(CXCR4),ENSBTAG00000001075(CALB2),ENSBTAG00000001269(TMEM165),ENSBTAG00000001398(ATP2A2),ENSBTAG00000001475(MCUR1),ENSBTAG00000001516(CALCB),ENSBTAG00000001557(CCL28),ENS…
BP	GO:0009314	response to radiation	2.3e-06	5.52995e-05	ENSBTAG00000000013(PRKAA1),ENSBTAG00000000252(POLE3),ENSBTAG00000000372(TIPIN),ENSBTAG00000000423(RBM4B),ENSBTAG00000000428(BAK1),ENSBTAG00000000445(PDE6C),ENSBTAG00000000483(HYAL1),ENSBTAG00000000484(HYAL2),ENSBTAG00000000579(NIPBL),ENSBTAG00000000632(RAD54B),ENSBTAG00000000745(AQP1),ENSBTAG00000000831(CTNS),ENSBTAG00000000837(PARP1),ENSBTAG00000001069(TP53),ENSBTAG00000001083(MAP3K20),ENSBTAG00…
BP	GO:0016570	histone modification	2.3e-06	5.52995e-05	ENSBTAG00000000013(PRKAA1),ENSBTAG00000000023(RNF2),ENSBTAG00000000039(SIRT7),ENSBTAG00000000098(SETDB1),ENSBTAG00000000222(ARID4B),ENSBTAG00000000252(POLE3),ENSBTAG00000000343(ZNHIT1),ENSBTAG00000000579(NIPBL),ENSBTAG00000000694(TAF10),ENSBTAG00000000730(GCG),ENSBTAG00000000746(KAT2B),ENSBTAG00000000895(TAF9B),ENSBTAG00000000902(OGT),ENSBTAG00000000978(ASH2L),ENSBTAG00000001061(PRKCA),ENSBTAG000…
BP	GO:0035295	tube development	2.4e-06	5.73494e-05	ENSBTAG00000000009(FOXF1),ENSBTAG00000000074(NFIA),ENSBTAG00000000085(CYP1A2),ENSBTAG00000000128(FGF18),ENSBTAG00000000182(SPINT2),ENSBTAG00000000231(BMPR1A),ENSBTAG00000000283(CSF1),ENSBTAG00000000305(LMO4),ENSBTAG00000000342(PLOD3),ENSBTAG00000000541(NKX2-1),ENSBTAG00000000569(HES1),ENSBTAG00000000570(RET),ENSBTAG00000000579(NIPBL),ENSBTAG00000000616(GPR161),ENSBTAG00000000625(SMAD6),ENSBTAG000…
BP	GO:0002696	positive regulation of leukocyte activation	2.4e-06	5.73494e-05	ENSBTAG00000000095(CD274),ENSBTAG00000000130(TNFSF13),ENSBTAG00000000563(MYD88),ENSBTAG00000000569(HES1),ENSBTAG00000000888(SPTA1),ENSBTAG00000000962(STAP1),ENSBTAG00000001219,ENSBTAG00000001273(NLRP3),ENSBTAG00000001321(IL1B),ENSBTAG00000001424(MSH6),ENSBTAG00000001511(BCL6),ENSBTAG00000001729(DUSP10),ENSBTAG00000001864(NR4A3),ENSBTAG00000002006(THBS1),ENSBTAG00000002041(SASH3),ENSBTAG0000000219…
BP	GO:0071902	positive regulation of protein serine/threonine kinase activity	2.4e-06	5.73494e-05	ENSBTAG00000000128(FGF18),ENSBTAG00000000218(MAP2K5),ENSBTAG00000000354(PDE6G),ENSBTAG00000000469(PPP2CA),ENSBTAG00000000570(RET),ENSBTAG00000001037(MAP4K2),ENSBTAG00000001083(MAP3K20),ENSBTAG00000001292(LTF),ENSBTAG00000001321(IL1B),ENSBTAG00000001609(MAP2K6),ENSBTAG00000001774(SPRY2),ENSBTAG00000001815(ARHGEF5),ENSBTAG00000001826(SASH1),ENSBTAG00000001938(CKS2),ENSBTAG00000002006(THBS1),ENSBTAG…
BP	GO:0007059	chromosome segregation	2.4e-06	5.73494e-05	ENSBTAG00000000064(FEN1),ENSBTAG00000000500(PINX1),ENSBTAG00000000579(NIPBL),ENSBTAG00000000660(FAM83D),ENSBTAG00000000752(SGO1),ENSBTAG00000000789(PPP1R7),ENSBTAG00000000981(KLHDC8B),ENSBTAG00000001323(CENPC),ENSBTAG00000001463(TNKS),ENSBTAG00000001567(LRRK1),ENSBTAG00000001631(KIFC1),ENSBTAG00000001698(CHTF8),ENSBTAG00000001700(CDC42),ENSBTAG00000001717(AURKB),ENSBTAG00000001776(SIRT2),ENSBTAG0…
CC	GO:0031253	cell projection membrane	2.4e-06	5.73494e-05	ENSBTAG00000000113(ARHGEF2),ENSBTAG00000000215(GNB1),ENSBTAG00000000354(PDE6G),ENSBTAG00000000369(EPS8),ENSBTAG00000000377(BMX),ENSBTAG00000000616(GPR161),ENSBTAG00000000668(SLC22A5),ENSBTAG00000000745(AQP1),ENSBTAG00000000899(TMEM17),ENSBTAG00000001029(RASGRP2),ENSBTAG00000001188(ROM1),ENSBTAG00000001204(JCAD),ENSBTAG00000001231(CDHR1),ENSBTAG00000001279(MPP2),ENSBTAG00000001310(RHO),ENSBTAG0000…
BP	GO:0048285	organelle fission	2.5e-06	5.93742e-05	ENSBTAG00000000039(SIRT7),ENSBTAG00000000169(ASZ1),ENSBTAG00000000281(MND1),ENSBTAG00000000369(EPS8),ENSBTAG00000000500(PINX1),ENSBTAG00000000502(DAZL),ENSBTAG00000000579(NIPBL),ENSBTAG00000000599(CCNI),ENSBTAG00000000752(SGO1),ENSBTAG00000000782(KDR),ENSBTAG00000000854(SEC16B),ENSBTAG00000000981(KLHDC8B),ENSBTAG00000001321(IL1B),ENSBTAG00000001323(CENPC),ENSBTAG00000001424(MSH6),ENSBTAG000000014…
BP	GO:0045892	negative regulation of transcription, DNA-templated	2.5e-06	5.93742e-05	ENSBTAG00000000009(FOXF1),ENSBTAG00000000023(RNF2),ENSBTAG00000000031(TRPV4),ENSBTAG00000000039(SIRT7),ENSBTAG00000000074(NFIA),ENSBTAG00000000092(HIF1AN),ENSBTAG00000000098(SETDB1),ENSBTAG00000000252(POLE3),ENSBTAG00000000266(NAB1),ENSBTAG00000000332(ERF),ENSBTAG00000000455(CREBZF),ENSBTAG00000000541(NKX2-1),ENSBTAG00000000569(HES1),ENSBTAG00000000579(NIPBL),ENSBTAG00000000697(RRP8),ENSBTAG00000…
BP	GO:0070663	regulation of leukocyte proliferation	2.5e-06	5.93742e-05	ENSBTAG00000000095(CD274),ENSBTAG00000000283(CSF1),ENSBTAG00000000317(MAPK8IP1),ENSBTAG00000000563(MYD88),ENSBTAG00000000569(HES1),ENSBTAG00000000604(GPNMB),ENSBTAG00000000888(SPTA1),ENSBTAG00000001321(IL1B),ENSBTAG00000001508(SH3RF1),ENSBTAG00000001511(BCL6),ENSBTAG00000001805(TWSG1),ENSBTAG00000002041(SASH3),ENSBTAG00000002326(LGALS3),ENSBTAG00000002474(MAD1L1),ENSBTAG00000003111(ATM),ENSBTAG00…
BP	GO:0055074	calcium ion homeostasis	2.5e-06	5.93742e-05	ENSBTAG00000000031(TRPV4),ENSBTAG00000000292(TCIRG1),ENSBTAG00000000312(GRINA),ENSBTAG00000000428(BAK1),ENSBTAG00000000494(PDE4D),ENSBTAG00000000520(ATP2B3),ENSBTAG00000000842(UBASH3B),ENSBTAG00000000898(F2RL2),ENSBTAG00000001060(CXCR4),ENSBTAG00000001075(CALB2),ENSBTAG00000001269(TMEM165),ENSBTAG00000001398(ATP2A2),ENSBTAG00000001475(MCUR1),ENSBTAG00000001516(CALCB),ENSBTAG00000001557(CCL28),ENS…
BP	GO:0071621	granulocyte chemotaxis	2.5e-06	5.93742e-05	ENSBTAG00000000031(TRPV4),ENSBTAG00000000283(CSF1),ENSBTAG00000000494(PDE4D),ENSBTAG00000001191(CCL17),ENSBTAG00000001321(IL1B),ENSBTAG00000001725(CXCL10),ENSBTAG00000002085(IL36G),ENSBTAG00000002326(LGALS3),ENSBTAG00000003176(JAM3),ENSBTAG00000003289,ENSBTAG00000004129(CCL11),ENSBTAG00000004215(RARRES2),ENSBTAG00000004378(IL23A),ENSBTAG00000004715(AKIRIN1),ENSBTAG00000004767(SYK),ENSBTAG00000004…
BP	GO:0030307	positive regulation of cell growth	2.6e-06	6.15238e-05	ENSBTAG00000000483(HYAL1),ENSBTAG00000000895(TAF9B),ENSBTAG00000000957(CDKN2AIP),ENSBTAG00000001044(SUPV3L1),ENSBTAG00000001306(FXN),ENSBTAG00000001801(SYT4),ENSBTAG00000001870(CPNE6),ENSBTAG00000001941(SEMA4D),ENSBTAG00000001961(MAP1B),ENSBTAG00000002661(ISLR2),ENSBTAG00000002883(RPTOR),ENSBTAG00000003014(TRPV2),ENSBTAG00000003134(CRYAA),ENSBTAG00000003177(SLC25A33),ENSBTAG00000003791(LPAR3),ENS…
CC	GO:0005777	peroxisome	2.6e-06	6.15238e-05	ENSBTAG00000000123(HAO2),ENSBTAG00000000806(ATAD1),ENSBTAG00000001932(CRAT),ENSBTAG00000002296(TMEM173),ENSBTAG00000002843(ACOT4),ENSBTAG00000003126(PEX16),ENSBTAG00000003718(HACL1),ENSBTAG00000003746(SCP2),ENSBTAG00000003885(PEX2),ENSBTAG00000004075(IDI1),ENSBTAG00000004178(ACOX2),ENSBTAG00000004248(MLYCD),ENSBTAG00000004303(SLC27A2),ENSBTAG00000004893(ACOX3),ENSBTAG00000005183(MVK),ENSBTAG00000…
CC	GO:0042579	microbody	2.6e-06	6.15238e-05	ENSBTAG00000000123(HAO2),ENSBTAG00000000806(ATAD1),ENSBTAG00000001932(CRAT),ENSBTAG00000002296(TMEM173),ENSBTAG00000002843(ACOT4),ENSBTAG00000003126(PEX16),ENSBTAG00000003718(HACL1),ENSBTAG00000003746(SCP2),ENSBTAG00000003885(PEX2),ENSBTAG00000004075(IDI1),ENSBTAG00000004178(ACOX2),ENSBTAG00000004248(MLYCD),ENSBTAG00000004303(SLC27A2),ENSBTAG00000004893(ACOX3),ENSBTAG00000005183(MVK),ENSBTAG00000…
BP	GO:1902679	negative regulation of RNA biosynthetic process	2.7e-06	6.36578e-05	ENSBTAG00000000009(FOXF1),ENSBTAG00000000023(RNF2),ENSBTAG00000000031(TRPV4),ENSBTAG00000000039(SIRT7),ENSBTAG00000000074(NFIA),ENSBTAG00000000092(HIF1AN),ENSBTAG00000000098(SETDB1),ENSBTAG00000000252(POLE3),ENSBTAG00000000266(NAB1),ENSBTAG00000000332(ERF),ENSBTAG00000000455(CREBZF),ENSBTAG00000000541(NKX2-1),ENSBTAG00000000546(TOB1),ENSBTAG00000000569(HES1),ENSBTAG00000000579(NIPBL),ENSBTAG00000…
BP	GO:1903507	negative regulation of nucleic acid-templated transcription	2.7e-06	6.36578e-05	ENSBTAG00000000009(FOXF1),ENSBTAG00000000023(RNF2),ENSBTAG00000000031(TRPV4),ENSBTAG00000000039(SIRT7),ENSBTAG00000000074(NFIA),ENSBTAG00000000092(HIF1AN),ENSBTAG00000000098(SETDB1),ENSBTAG00000000252(POLE3),ENSBTAG00000000266(NAB1),ENSBTAG00000000332(ERF),ENSBTAG00000000455(CREBZF),ENSBTAG00000000541(NKX2-1),ENSBTAG00000000546(TOB1),ENSBTAG00000000569(HES1),ENSBTAG00000000579(NIPBL),ENSBTAG00000…
CC	GO:0044798	nuclear transcription factor complex	2.7e-06	6.36578e-05	ENSBTAG00000000054(SNAPC4),ENSBTAG00000000484(HYAL2),ENSBTAG00000000504(GTF2B),ENSBTAG00000000656(NFATC1),ENSBTAG00000000694(TAF10),ENSBTAG00000000895(TAF9B),ENSBTAG00000001069(TP53),ENSBTAG00000001333(PPARG),ENSBTAG00000001755(NEUROD1),ENSBTAG00000001979(TAF7L),ENSBTAG00000002072(ERCC2),ENSBTAG00000002335(HAND1),ENSBTAG00000002422(BCL9),ENSBTAG00000002586(TCF12),ENSBTAG00000002678(MED18),ENSBTAG…
BP	GO:0006637	acyl-CoA metabolic process	2.8e-06	6.57763e-05	ENSBTAG00000000690(THEM5),ENSBTAG00000001417(ACSM1),ENSBTAG00000001908(DLD),ENSBTAG00000002843(ACOT4),ENSBTAG00000003359(ELOVL5),ENSBTAG00000003898(HMGCS2),ENSBTAG00000004248(MLYCD),ENSBTAG00000004281(ACSS1),ENSBTAG00000005183(MVK),ENSBTAG00000005730(GPAT4),ENSBTAG00000006029(OGDH),ENSBTAG00000006075(SUCLG1),ENSBTAG00000006978(HSD17B4),ENSBTAG00000007031(OXSM),ENSBTAG00000007184(NUDT7),ENSBTAG000…
BP	GO:0035383	thioester metabolic process	2.8e-06	6.57763e-05	ENSBTAG00000000690(THEM5),ENSBTAG00000001417(ACSM1),ENSBTAG00000001908(DLD),ENSBTAG00000002843(ACOT4),ENSBTAG00000003359(ELOVL5),ENSBTAG00000003898(HMGCS2),ENSBTAG00000004248(MLYCD),ENSBTAG00000004281(ACSS1),ENSBTAG00000005183(MVK),ENSBTAG00000005730(GPAT4),ENSBTAG00000006029(OGDH),ENSBTAG00000006075(SUCLG1),ENSBTAG00000006978(HSD17B4),ENSBTAG00000007031(OXSM),ENSBTAG00000007184(NUDT7),ENSBTAG000…
CC	GO:0005884	actin filament	2.8e-06	6.57763e-05	ENSBTAG00000000322(CD2AP),ENSBTAG00000001081(PALLD),ENSBTAG00000001332(MYO1C),ENSBTAG00000001523(YES1),ENSBTAG00000001585(WIPF1),ENSBTAG00000002123(MYO3A),ENSBTAG00000002157(LMOD2),ENSBTAG00000002624(PSTPIP2),ENSBTAG00000002996(SHROOM4),ENSBTAG00000003100(SMTN),ENSBTAG00000003543(KEAP1),ENSBTAG00000004553(TPM4),ENSBTAG00000004643(WASL),ENSBTAG00000004783(CORO1B),ENSBTAG00000005116(FKBP15),ENSBTAG…
BP	GO:0034330	cell junction organization	2.9e-06	6.76354e-05	ENSBTAG00000000031(TRPV4),ENSBTAG00000000561(OCLN),ENSBTAG00000000782(KDR),ENSBTAG00000000815(EPHA2),ENSBTAG00000001017(SLK),ENSBTAG00000001061(PRKCA),ENSBTAG00000001209(PHLDB2),ENSBTAG00000001332(MYO1C),ENSBTAG00000001403(PRKCI),ENSBTAG00000001700(CDC42),ENSBTAG00000001739(CDH20),ENSBTAG00000001835(GJA1),ENSBTAG00000002238(ARL2),ENSBTAG00000002411(CTNND1),ENSBTAG00000002430(COL17A1),ENSBTAG00000…
BP	GO:0043393	regulation of protein binding	2.9e-06	6.76354e-05	ENSBTAG00000000073(LRPAP1),ENSBTAG00000000253(PTPRF),ENSBTAG00000000428(BAK1),ENSBTAG00000000730(GCG),ENSBTAG00000000731(WFIKKN2),ENSBTAG00000000842(UBASH3B),ENSBTAG00000000888(SPTA1),ENSBTAG00000001050(LDLRAP1),ENSBTAG00000001221(NKX3-1),ENSBTAG00000001700(CDC42),ENSBTAG00000001717(AURKB),ENSBTAG00000002095(MEN1),ENSBTAG00000002144(ADRB2),ENSBTAG00000002326(LGALS3),ENSBTAG00000002333(HOPX),ENSBT…
BP	GO:0050670	regulation of lymphocyte proliferation	2.9e-06	6.76354e-05	ENSBTAG00000000095(CD274),ENSBTAG00000000317(MAPK8IP1),ENSBTAG00000000563(MYD88),ENSBTAG00000000569(HES1),ENSBTAG00000000604(GPNMB),ENSBTAG00000000888(SPTA1),ENSBTAG00000001321(IL1B),ENSBTAG00000001508(SH3RF1),ENSBTAG00000001511(BCL6),ENSBTAG00000001805(TWSG1),ENSBTAG00000002041(SASH3),ENSBTAG00000002326(LGALS3),ENSBTAG00000002474(MAD1L1),ENSBTAG00000003111(ATM),ENSBTAG00000004378(IL23A),ENSBTAG0…
BP	GO:0050867	positive regulation of cell activation	2.9e-06	6.76354e-05	ENSBTAG00000000095(CD274),ENSBTAG00000000130(TNFSF13),ENSBTAG00000000563(MYD88),ENSBTAG00000000569(HES1),ENSBTAG00000000888(SPTA1),ENSBTAG00000000962(STAP1),ENSBTAG00000001219,ENSBTAG00000001273(NLRP3),ENSBTAG00000001321(IL1B),ENSBTAG00000001424(MSH6),ENSBTAG00000001511(BCL6),ENSBTAG00000001729(DUSP10),ENSBTAG00000001864(NR4A3),ENSBTAG00000002006(THBS1),ENSBTAG00000002041(SASH3),ENSBTAG0000000219…
BP	GO:0016071	mRNA metabolic process	2.9e-06	6.76354e-05	ENSBTAG00000000267(SMG6),ENSBTAG00000000288(UPF2),ENSBTAG00000000399(NANOS3),ENSBTAG00000000409(CDC40),ENSBTAG00000000423(RBM4B),ENSBTAG00000000439(SFSWAP),ENSBTAG00000000502(DAZL),ENSBTAG00000000546(TOB1),ENSBTAG00000000551(SMNDC1),ENSBTAG00000000613(ELAVL1),ENSBTAG00000000678(CSDE1),ENSBTAG00000000721(GPATCH1),ENSBTAG00000000848(SNRNP200),ENSBTAG00000000955(RBM41),ENSBTAG00000001035(SF1),ENSBTA…
CC	GO:0043025	neuronal cell body	2.9e-06	6.76354e-05	ENSBTAG00000000013(PRKAA1),ENSBTAG00000000088(ALCAM),ENSBTAG00000000109(NPTXR),ENSBTAG00000000113(ARHGEF2),ENSBTAG00000000253(PTPRF),ENSBTAG00000000534(PNOC),ENSBTAG00000000644(S100A5),ENSBTAG00000000778(HSP90AB1),ENSBTAG00000001296(TMEM50A),ENSBTAG00000001657(PICALM),ENSBTAG00000001776(SIRT2),ENSBTAG00000001801(SYT4),ENSBTAG00000001870(CPNE6),ENSBTAG00000001961(MAP1B),ENSBTAG00000002010(PI4K2A),…
CC	GO:0098589	membrane region	3.1e-06	7.22133e-05	ENSBTAG00000000152(RANBP2),ENSBTAG00000000231(BMPR1A),ENSBTAG00000000469(PPP2CA),ENSBTAG00000000484(HYAL2),ENSBTAG00000000570(RET),ENSBTAG00000000736(LRP8),ENSBTAG00000000745(AQP1),ENSBTAG00000000782(KDR),ENSBTAG00000000894(PGK1),ENSBTAG00000001027(SERPINH1),ENSBTAG00000001137(CLTA),ENSBTAG00000001192(STX12),ENSBTAG00000001332(MYO1C),ENSBTAG00000001657(PICALM),ENSBTAG00000001882(CD79A),ENSBTAG000…
BP	GO:0051258	protein polymerization	3.2e-06	7.44536e-05	ENSBTAG00000000021(WASHC3),ENSBTAG00000000369(EPS8),ENSBTAG00000000650(TUBGCP6),ENSBTAG00000000871(TRIM27),ENSBTAG00000000897(IQGAP2),ENSBTAG00000001009(HCLS1),ENSBTAG00000001585(WIPF1),ENSBTAG00000001638(FGA),ENSBTAG00000001771(DYRK1A),ENSBTAG00000002157(LMOD2),ENSBTAG00000002238(ARL2),ENSBTAG00000002350(PIK3R2),ENSBTAG00000002624(PSTPIP2),ENSBTAG00000002941(FES),ENSBTAG00000003051(FER),ENSBTAG0…
BP	GO:0050778	positive regulation of immune response	3.3e-06	7.6597e-05	ENSBTAG00000000016(LTA),ENSBTAG00000000095(CD274),ENSBTAG00000000130(TNFSF13),ENSBTAG00000000306(ITK),ENSBTAG00000000377(BMX),ENSBTAG00000000415(ERBIN),ENSBTAG00000000436(TNFAIP3),ENSBTAG00000000494(PDE4D),ENSBTAG00000000563(MYD88),ENSBTAG00000000630(LSM14A),ENSBTAG00000000892(CGAS),ENSBTAG00000000962(STAP1),ENSBTAG00000001034(IL18R1),ENSBTAG00000001193(UNC93B1),ENSBTAG00000001219,ENSBTAG00000001…
BP	GO:0002687	positive regulation of leukocyte migration	3.3e-06	7.6597e-05	ENSBTAG00000000031(TRPV4),ENSBTAG00000000283(CSF1),ENSBTAG00000001725(CXCL10),ENSBTAG00000001987(SWAP70),ENSBTAG00000002190(DOCK8),ENSBTAG00000002326(LGALS3),ENSBTAG00000004215(RARRES2),ENSBTAG00000004279(RHOA),ENSBTAG00000004378(IL23A),ENSBTAG00000004715(AKIRIN1),ENSBTAG00000005077(CXCL12),ENSBTAG00000005221(WNK1),ENSBTAG00000005273(IL1R1),ENSBTAG00000005339(VEGFA),ENSBTAG00000005434(PLVAP),ENSB…
MF	GO:0019787	ubiquitin-like protein transferase activity	3.4e-06	7.85432e-05	ENSBTAG00000000023(RNF2),ENSBTAG00000000201(LTN1),ENSBTAG00000000260(ZNRF2),ENSBTAG00000000436(TNFAIP3),ENSBTAG00000000501(KLHL13),ENSBTAG00000000540(RNF112),ENSBTAG00000000753(PIAS4),ENSBTAG00000000856(FBXL6),ENSBTAG00000000871(TRIM27),ENSBTAG00000000911(UBE2H),ENSBTAG00000000961(NEURL2),ENSBTAG00000001168(BRAP),ENSBTAG00000001425(FBXO11),ENSBTAG00000001503(TRIM72),ENSBTAG00000001508(SH3RF1),ENS…
MF	GO:0000981	RNA polymerase II transcription factor activity, sequence-specific DNA binding	3.4e-06	7.85432e-05	ENSBTAG00000000009(FOXF1),ENSBTAG00000000040(MAFG),ENSBTAG00000000074(NFIA),ENSBTAG00000000231(BMPR1A),ENSBTAG00000000264(RFX6),ENSBTAG00000000332(ERF),ENSBTAG00000000507(NR4A1),ENSBTAG00000000541(NKX2-1),ENSBTAG00000000558(NEUROD6),ENSBTAG00000000569(HES1),ENSBTAG00000000602(RXRB),ENSBTAG00000000816(PRDM1),ENSBTAG00000000837(PARP1),ENSBTAG00000000919(HEY2),ENSBTAG00000000923(HOXC13),ENSBTAG00000…
BP	GO:0097191	extrinsic apoptotic signaling pathway	3.4e-06	7.85432e-05	ENSBTAG00000000428(BAK1),ENSBTAG00000000436(TNFAIP3),ENSBTAG00000000484(HYAL2),ENSBTAG00000000735(BCL2A1),ENSBTAG00000000738(DAPK1),ENSBTAG00000000836(KRT8),ENSBTAG00000000878(RB1CC1),ENSBTAG00000001014(MAPK7),ENSBTAG00000001321(IL1B),ENSBTAG00000001508(SH3RF1),ENSBTAG00000001570(CSF2),ENSBTAG00000002006(THBS1),ENSBTAG00000002081(BMPR1B),ENSBTAG00000002315(RNF34),ENSBTAG00000002326(LGALS3),ENSBTA…
BP	GO:0016482	cytosolic transport	3.4e-06	7.85432e-05	ENSBTAG00000000025(RAB6A),ENSBTAG00000000274(YKT6),ENSBTAG00000000676(DOP1A),ENSBTAG00000000871(TRIM27),ENSBTAG00000000905(RAB6B),ENSBTAG00000001647(PLEKHJ1),ENSBTAG00000001662(EHD3),ENSBTAG00000001744(BET1L),ENSBTAG00000001948(VTI1B),ENSBTAG00000002014(SNX1),ENSBTAG00000002493(VPS35),ENSBTAG00000002643(VPS52),ENSBTAG00000002769(AP1G1),ENSBTAG00000002774(PTPN23),ENSBTAG00000002881(AP4M1),ENSBTAG0…
BP	GO:0050767	regulation of neurogenesis	3.5e-06	8.0471e-05	ENSBTAG00000000113(ARHGEF2),ENSBTAG00000000164(GNRH1),ENSBTAG00000000205(MMD),ENSBTAG00000000231(BMPR1A),ENSBTAG00000000253(PTPRF),ENSBTAG00000000283(CSF1),ENSBTAG00000000540(RNF112),ENSBTAG00000000569(HES1),ENSBTAG00000000570(RET),ENSBTAG00000000579(NIPBL),ENSBTAG00000000588(CHODL),ENSBTAG00000000919(HEY2),ENSBTAG00000000962(STAP1),ENSBTAG00000001028(MAP6),ENSBTAG00000001069(TP53),ENSBTAG0000000…
BP	GO:0051251	positive regulation of lymphocyte activation	3.5e-06	8.0471e-05	ENSBTAG00000000095(CD274),ENSBTAG00000000130(TNFSF13),ENSBTAG00000000563(MYD88),ENSBTAG00000000569(HES1),ENSBTAG00000000888(SPTA1),ENSBTAG00000001219,ENSBTAG00000001273(NLRP3),ENSBTAG00000001321(IL1B),ENSBTAG00000001424(MSH6),ENSBTAG00000001511(BCL6),ENSBTAG00000001729(DUSP10),ENSBTAG00000002041(SASH3),ENSBTAG00000002190(DOCK8),ENSBTAG00000002742(MSH2),ENSBTAG00000002769(AP1G1),ENSBTAG00000003166…
BP	GO:0006633	fatty acid biosynthetic process	3.5e-06	8.0471e-05	ENSBTAG00000001321(IL1B),ENSBTAG00000001417(ACSM1),ENSBTAG00000001592(INSIG1),ENSBTAG00000001727(PRXL2B),ENSBTAG00000002413(MCAT),ENSBTAG00000002497(ELOVL2),ENSBTAG00000003072(ACADVL),ENSBTAG00000003359(ELOVL5),ENSBTAG00000004248(MLYCD),ENSBTAG00000004364(THNSL2),ENSBTAG00000005045(GIP),ENSBTAG00000005709(ABHD3),ENSBTAG00000005940(PRKAB1),ENSBTAG00000006391(NDUFAB1),ENSBTAG00000006489(MYO5A),ENSB…
CC	GO:0030424	axon	3.5e-06	8.0471e-05	ENSBTAG00000000013(PRKAA1),ENSBTAG00000000088(ALCAM),ENSBTAG00000000153(LRFN3),ENSBTAG00000000317(MAPK8IP1),ENSBTAG00000000570(RET),ENSBTAG00000000745(AQP1),ENSBTAG00000000778(HSP90AB1),ENSBTAG00000000795(NMNAT2),ENSBTAG00000001028(MAP6),ENSBTAG00000001081(PALLD),ENSBTAG00000001243(AP3M2),ENSBTAG00000001407(AP3S2),ENSBTAG00000001481(IGSF9),ENSBTAG00000001771(DYRK1A),ENSBTAG00000001801(SYT4),ENSBT…
MF	GO:0050662	coenzyme binding	3.7e-06	8.48687e-05	ENSBTAG00000000011(TDH),ENSBTAG00000000039(SIRT7),ENSBTAG00000000246(ME3),ENSBTAG00000000291(DHTKD1),ENSBTAG00000000786(NQO2),ENSBTAG00000000837(PARP1),ENSBTAG00000001164(ACAD10),ENSBTAG00000001165(AIFM2),ENSBTAG00000001731(GLYR1),ENSBTAG00000001776(SIRT2),ENSBTAG00000001908(DLD),ENSBTAG00000002044(SIRT3),ENSBTAG00000002049(HADH),ENSBTAG00000002203(NDUFS2),ENSBTAG00000002321(AMT),ENSBTAG000000023…
BP	GO:0032970	regulation of actin filament-based process	3.7e-06	8.48687e-05	ENSBTAG00000000322(CD2AP),ENSBTAG00000000347(RHOG),ENSBTAG00000000369(EPS8),ENSBTAG00000000494(PDE4D),ENSBTAG00000000684(ARHGEF10L),ENSBTAG00000000871(TRIM27),ENSBTAG00000000897(IQGAP2),ENSBTAG00000000962(STAP1),ENSBTAG00000000992(BMP10),ENSBTAG00000001009(HCLS1),ENSBTAG00000001209(PHLDB2),ENSBTAG00000001446(ABRACL),ENSBTAG00000001585(WIPF1),ENSBTAG00000001687(STC1),ENSBTAG00000001700(CDC42),ENSB…
[truncated: 1,339 more rows]
